# Supplementary material for: Unified Metal-Free Regioselective Heck-Type Sulfonylation, Cyanation, Amination, Amidation of Alkenes by Thianthrenation
Source: Research Square preprint supplement (doi:10.21203/rs.3.rs-2691386/v1), 2023-08-18

# Unified Metal-Free Regioselective Heck-Type Sulfonylation, Cyanation, Amination, Amidation of Alkenes by Thianthrenation

Ming-Shang Liu<sup>†</sup>, Huan Meng<sup>†</sup>, and Wei Shu<sup>†,††,\*</sup>

<sup>†</sup>*Shenzhen Grubbs Institute and Department of Chemistry, Southern University of Science and Technology, Shenzhen 518055, Guangdong, P. R. China.*

<sup>††</sup>*State Key Laboratory of Elemento-Organic Chemistry, Nankai University, 300071 Tianjin, P. R. China*

\*E-mail: [shuw@sustech.edu.cn](mailto:shuw@sustech.edu.cn)

## Table of Contents

|                                                                                   |     |
|-----------------------------------------------------------------------------------|-----|
| I. General Information .....                                                      | S2  |
| II. Optimization of Reaction Conditions.....                                      | S3  |
| III. Substrate Synthesis and Characterization.....                                | S6  |
| IV. General Procedure for the Alkene .....                                        | S12 |
| V. Gram Scale Synthesis .....                                                     | S14 |
| VI. Characterization of Cross-Coupling Products.....                              | S15 |
| VII. Mechanistic Study .....                                                      | S46 |
| One-Pot Experiments.....                                                          | S46 |
| Probe of Radical Experiments .....                                                | S47 |
| Assignment of Reaction Intermediate.....                                          | S48 |
| VIII. Crystallographic Data.....                                                  | S50 |
| IX. References .....                                                              | S53 |
| X. Copies of <sup>1</sup> H, <sup>13</sup> C and <sup>19</sup> F NMR Spectra..... | S55 |

## I. General Information

**General remarks:** Unless otherwise noted, all reactions of substrates preparation were conducted in flame-dried glassware under a nitrogen atmosphere using anhydrous solvent were re-distilled according to *Purification of Laboratory Chemicals* (Fifth Edition). Commercially available reagents were used without further purification. Thin layer chromatography (TLC) was performed using Jiangyou TLC silica gel plates HSG F<sub>254</sub> and visualized using UV light, anisaldehyde or potassium permanganate. Flash column chromatography was performed over silica gel (300-400 mesh). <sup>1</sup>H and <sup>13</sup>C NMR spectra were recorded in CDCl<sub>3</sub>, unless otherwise noted, on a Bruker AVANCE 600 MHz or a Bruker AVANCE 400 MHz spectrometer. Chemical shifts in <sup>1</sup>H NMR spectra were reported in parts per million (ppm) on the  $\delta$  scale from an internal standard of residual chloroform (7.26 ppm). Data for <sup>1</sup>H NMR were reported as follows: chemical shift, multiplicity (s = singlet, d = doublet, t = triplet, q = quartet, m = multiplet, br = broad), coupling constant in Hertz (Hz) and integration. Data for <sup>13</sup>C NMR spectra were reported in terms of chemical shift in ppm from the central peak of CDCl<sub>3</sub> (77.16 ppm). MS experiments were performed on a Thermo Scientific Q Exactive.

**Materials and methods:** Unless otherwise noted, commercial reagents were purchased from Energy Chemical Limited, J&K, Adamas-beta®, TCI, Aladdin, MERYER, Macklin Reagent, Alfa Aesar, Bidepharm and used directly without further purification. DCE and CH<sub>3</sub>CN were distilled over CaH<sub>2</sub> and stored under nitrogen atmosphere. Thianthrene was purchased from MERYER.

## II. Optimization of Reaction Conditions

**Table S1.** Evaluation of solvent for sulfonylation

$\text{MeSO}_2\text{Na}$  (**1a**) + **2a**  $\xrightarrow[\text{r.t., 10 h}]{\text{solvent (0.1 M)}}$  **3a**

| entry | solvent                    | conversion of <b>2a</b> | yield of <b>3a</b> <sup>a</sup> |
|-------|----------------------------|-------------------------|---------------------------------|
| 1     | DCE (0.1 M)                | >95%                    | 88% (83%)                       |
| 2     | DMF (0.1 M)                | >95%                    | 62%                             |
| 3     | DMA (0.1 M)                | >95%                    | 52%                             |
| 4     | THF (0.1 M)                | >95%                    | 75%                             |
| 5     | CH <sub>3</sub> CN (0.1 M) | 90%                     | 56%                             |
| 6     | DCM (0.1 M)                | >95%                    | 78%                             |
| 7     | DMSO (0.1 M)               | >95%                    | 65%                             |
| 8     | DME (0.1 M)                | >95%                    | 77%                             |
| 9     | toluene (0.1 M)            | >95%                    | 76%                             |

<sup>a</sup> The reaction was conducted using sodium methanesulfinate **1a** (15.6 mg, 0.15 mmol, 1.5 equiv), (*E*)-5-(4-phenylbut-1-en-1-yl)-5*H*-thianthren-5-ium tetrafluoroborate **2a** (43.4 mg, 0.10 mmol, 1.0 equiv) for 10 h. The reaction was run in 1.0 mL solvent at room temperature. Yield was determined by <sup>1</sup>H NMR of the crude mixture using mesitylene (12.0 mg, 0.10 mmol, 1.0 equiv) as internal standard. Isolated yield after flash chromatography is shown in the parentheses. N.D. = not detected.

**Table S2.** Evaluation of additives for cyanation

$\text{Zn(CN)}_2$  (**1u**) + **2a**  $\xrightarrow[\text{CH}_3\text{CN (0.1 M), r.t., 10 h}]{\text{additives}}$  **5a**

| entry | additives                                   | Conversion of <b>2a</b> | yield of <b>5a</b> <sup>a</sup> |
|-------|---------------------------------------------|-------------------------|---------------------------------|
| 1     | -                                           | 20%                     | N.D.                            |
| 2     | <sup>n</sup> Bu <sub>4</sub> NF (1.0 equiv) | 53%                     | N.D.                            |

|    |                 |      |           |
|----|-----------------|------|-----------|
| 3  | KI (1.0 equiv)  | 13%  | N.D.      |
| 4  | KBr (1.0 equiv) | 48%  | 7%        |
| 5  | KCl (1.0 equiv) | 34%  | 10%       |
| 6  | NaF (1.0 equiv) | 13%  | N.D.      |
| 7  | KF (1.0 equiv)  | 50%  | 35%       |
| 8  | CsF (1.0 equiv) | 64%  | 27%       |
| 9  | KF (2.0 equiv)  | 88%  | 50%       |
| 10 | KF (3.0 equiv)  | >95% | 77% (70%) |
| 11 | KF (4.0 equiv)  | >95% | 73%       |

<sup>a</sup> The reaction was conducted using zinc cyanide **1u** (17.6 mg, 0.15 mmol, 1.5 equiv), (*E*)-5-(4-phenylbut-1-en-1-yl)-5*H*-thianthren-5-ium tetrafluoroborate **2a** (43.4 mg, 0.10 mmol, 1.0 equiv) and additives for 10 h. The reaction was run in 1.0 mL CH<sub>3</sub>CN at room temperature. Yield was determined by <sup>1</sup>H NMR of the crude mixture using mesitylene (12.0 mg, 0.10 mmol, 1.0 equiv) as internal standard. Isolated yield after flash chromatography is shown in the parentheses. N.D. = not detected.

**Table S3.** Evaluation of solvent for cyanation

| 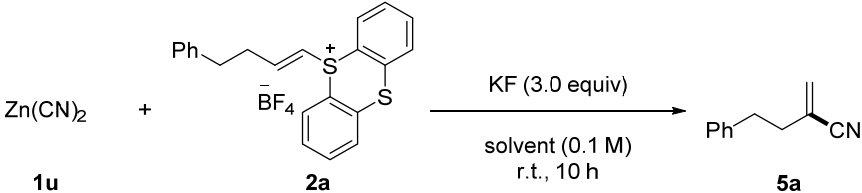 |                    |                         |                                 |
|--------------------------------------------------------------------------------------|--------------------|-------------------------|---------------------------------|
| entry                                                                                | solvent            | Conversion of <b>2a</b> | yield of <b>5a</b> <sup>a</sup> |
| 1                                                                                    | CH <sub>3</sub> CN | >95%                    | 77% (70%)                       |
| 2                                                                                    | DCM                | >95%                    | 8%                              |
| 3                                                                                    | DCE                | >95%                    | 7%                              |
| 4                                                                                    | THF                | >95%                    | trace                           |
| 5                                                                                    | DMF                | >95%                    | 31%                             |
| 6                                                                                    | DMSO               | >95%                    | 15%                             |
| 7                                                                                    | toluene            | 75%                     | 11%                             |

<sup>a</sup> The reaction was conducted using zinc cyanide **1u** (17.6 mg, 0.15 mmol, 1.5 equiv), (*E*)-5-(4-phenylbut-1-en-1-yl)-5*H*-thianthren-5-ium tetrafluoroborate **2a** (43.4 mg, 0.10 mmol, 1.0 equiv) and KF (17.4 mg, 0.3 mmol, 3.0 equiv) for 10 h. The reaction was run in 1.0 mL solvent at room temperature. Yield was determined by <sup>1</sup>H NMR of the crude mixture using mesitylene (12.0 mg, 0.10 mmol, 1.0 equiv) as internal

standard. Isolated yield after flash chromatography is shown in the parentheses. N.D. = not detected.

**Table S4.** Evaluation of base for amination

Reaction scheme showing the amination of indole **1v** with thianthren salt **2q** using various bases to produce **6a**. Conditions: base (1.0 equiv), CH<sub>3</sub>CN (0.1 M), r.t., 10 h.

| entry | base                                        | Conversion of <b>2q</b> | yield of <b>6a</b> <sup>a</sup> |
|-------|---------------------------------------------|-------------------------|---------------------------------|
| 1     | K <sub>2</sub> CO <sub>3</sub> (1.0 equiv)  | >95%                    | 84% (82%)                       |
| 2     | Cs <sub>2</sub> CO <sub>3</sub> (1.0 equiv) | >95%                    | 69%                             |
| 3     | Na <sub>2</sub> CO <sub>3</sub> (1.0 equiv) | 25%                     | N.D.                            |
| 4     | K <sub>3</sub> PO <sub>4</sub> (1.0 equiv)  | >95%                    | 59%                             |
| 5     | KOH (1.0 equiv)                             | >95%                    | 62%                             |

<sup>a</sup> The reaction was conducted using indole **1v** (17.6 mg, 0.15 mmol, 1.5 equiv), (*E*)-5-(4-fluorostyryl)-5*H*-thianthren-5-ium tetrafluoroborate **2q** (42.4 mg, 0.10 mmol, 1.0 equiv) and base (0.1 mmol, 1.0 equiv) for 10 h. The reaction was run in 1.0 mL CH<sub>3</sub>CN at room temperature. Yield was determined by <sup>1</sup>H NMR of the crude mixture using mesitylene (12.0 mg, 0.10 mmol, 1.0 equiv) as internal standard. Isolated yield after flash chromatography is shown in the parentheses. N.D. = not detected.

**Table S5.** Evaluation of solvent for amination

Reaction scheme showing the amination of indole **1v** with thianthren salt **2q** using K<sub>2</sub>CO<sub>3</sub> (1.0 equiv) in various solvents to produce **6a**. Conditions: K<sub>2</sub>CO<sub>3</sub> (1.0 equiv), solvent (0.1 M), r.t., 10 h.

| entry | solvent                    | Conversion of <b>2q</b> | yield of <b>6a</b> <sup>a</sup> |
|-------|----------------------------|-------------------------|---------------------------------|
| 1     | CH <sub>3</sub> CN (0.1 M) | >95%                    | 84% (82%)                       |
| 2     | DCM (0.1 M)                | 79%                     | 32%                             |
| 3     | DCE (0.1 M)                | 86%                     | 40%                             |
| 4     | THF (0.1 M)                | >95%                    | 61%                             |
| 5     | DMF (0.1 M)                | >95%                    | 36%                             |
| 6     | toluene (0.1 M)            | 58%                     | 18%                             |

<sup>a</sup> The reaction was conducted using indole **1v** (17.6 mg, 0.15 mmol, 1.5 equiv), (*E*)-5-(4-fluorostyryl)-5*H*-thianthren-5-ium tetrafluoroborate **2q** (42.4 mg, 0.10 mmol, 1.0 equiv) and K<sub>2</sub>CO<sub>3</sub> (13.8 mg, 0.1 mmol, 1.0 equiv) for 10 h. The reaction was run in 1.0 mL solvent at room temperature. Yield was determined by <sup>1</sup>H NMR of the crude mixture using mesitylene (12.0 mg, 0.10 mmol, 1.0 equiv) as internal standard. Isolated yield after flash chromatography is shown in the parentheses. N.D. = not detected.

### III. Substrate Synthesis and Characterization

**Table S6.** Nucleophiles used for the reaction.

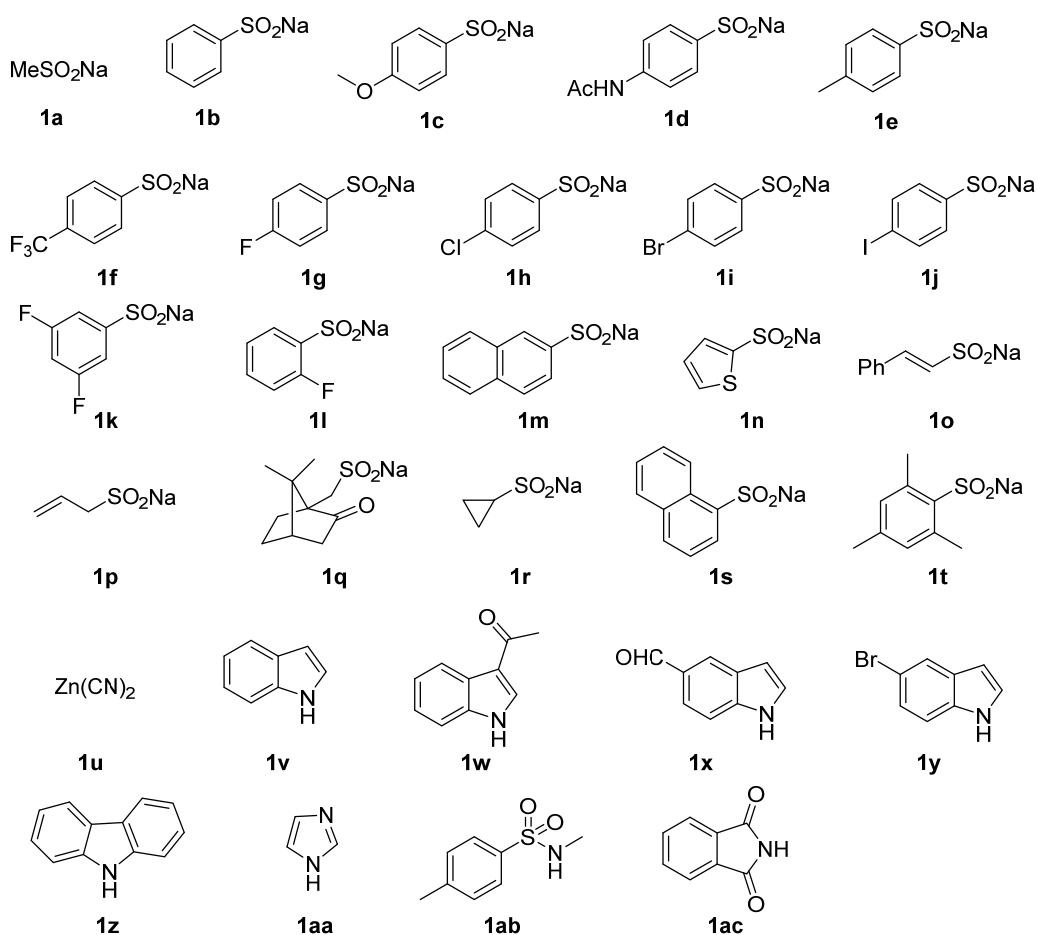

**1a, 1b, 1e, 1g, 1h, 1u, 1v, 1w, 1x, 1y, 1z, 1aa, 1ab, 1ac** were purchased from Alfa Aesar, Energy Chemical, Bidepharm, Adamas, Aladdin and TCI.

**1c, 1d, 1f, 1i, 1j, 1k, 1l, 1m, 1n, 1o, 1p, 1q, 1r, 1s and 1t** were synthesized following reported method.<sup>1-3</sup>

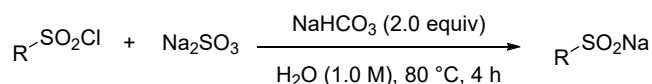

Sodium sulfite (1.25 g, 10.0 mmol, 2.0 equiv), sodium bicarbonate (0.84 g, 10.0 mmol, 2.0 equiv) and the corresponding aryl sulfonyl chloride (5.0 mmol, 1.0 equiv) were dissolved in distilled water (5.0 mL). The reaction mixture was stirred for 4 h at 80 °C. After cooling to rt, water was removed by lyophilization overnight. The white residue was extracted with ethanol (20.0 mL) to obtain the desired aryl sulfinate as white crystalline powder.

**Sodium 4-acetamidobenzenesulfinate (1d, CAS: 15898-43-8)**

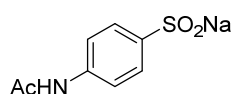

4-Acetamidobenzenesulfonyl chloride was used for the reaction to afford **1d** as white solid. <sup>1</sup>H NMR (400 MHz, D<sub>2</sub>O) δ 7.63 – 7.57 (m, 2H), 7.53 – 7.47 (m, 2H), 2.13 (s, 3H). The characterization data are consistent with literature.<sup>2</sup>

**Sodium 4-bromobenzenesulfinate (1i, CAS: 34176-08-4)**

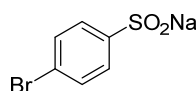

4-Bromobenzenesulfonyl chloride was used for the reaction to afford **1i** as white solid. <sup>1</sup>H NMR (400 MHz, D<sub>2</sub>O) δ 7.71 – 7.65 (m, 1H), 7.55 – 7.48 (m, 1H). The characterization data are consistent with literature.<sup>1</sup>

**Sodium 4-iodobenzenesulfinate (1j, CAS: 61404-98-6)**

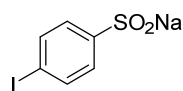

4-Iodobenzenesulfonyl chloride was used for the reaction to afford **1j** as white solid. <sup>1</sup>H NMR (400 MHz, D<sub>2</sub>O) δ 7.90 (d, *J* = 8.3 Hz, 2H), 7.38 (d, *J* = 8.3 Hz, 2H). The characterization data are consistent with literature.<sup>2</sup>

**Sodium naphthalene-2-sulfinate (1m, CAS: 63735-42-2)**

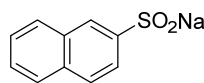

Naphthalene-2-sulfonyl chloride was used for the reaction to afford **1m** as white solid. <sup>1</sup>H NMR (600 MHz, D<sub>2</sub>O) δ 8.05 (s, 1H), 7.97 (s, 2H), 7.91 (s, 2H), 7.69 (s, 1H), 7.55 (s, 2H). The characterization data are consistent with literature.<sup>1-3</sup>

**Sodium (*E*)-2-phenylethene-1-sulfinate (1r, CAS: 130665-83-7)**

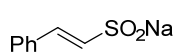

(*E*)-2-phenylethene-1-sulfonyl chloride was used for the reaction to afford **1r** as white solid. <sup>1</sup>H NMR (400 MHz, D<sub>2</sub>O) δ 7.61 – 7.52 (m, 2H), 7.48 – 7.37 (m, 3H), 7.01 (d, *J* = 16.1 Hz, 1H), 6.86 (d, *J* = 16.1 Hz, 1H). The characterization data are consistent with literature.<sup>3</sup>

**Sodium 2,4,6-trimethylbenzenesulfinate (1t, CAS: 50827-54-8)**

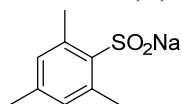

2,4,6-Trimethylbenzenesulfonyl chloride was used for the reaction to afford **1r** as white solid.  $^1\text{H}$  NMR (400 MHz,  $\text{D}_2\text{O}$ )  $\delta$  7.01 (s, 1H), 6.88 (s, 2H), 2.54 (s, 6H), 2.23 (s, 3H). The characterization data are consistent with literature.<sup>3</sup>

**Table S7.** Alkenyls thianthrenium salt used for the reaction.

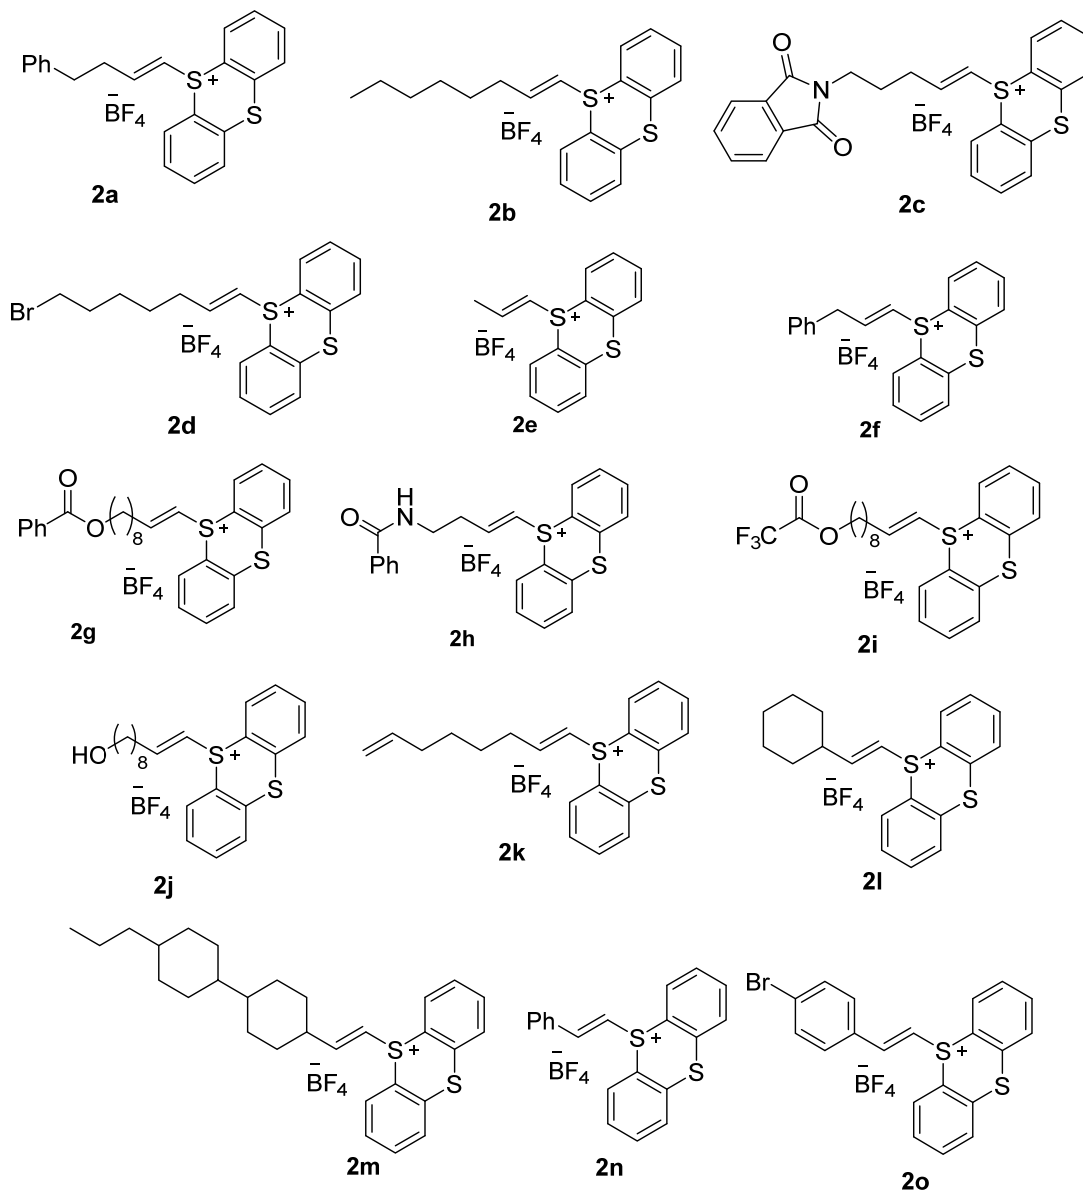



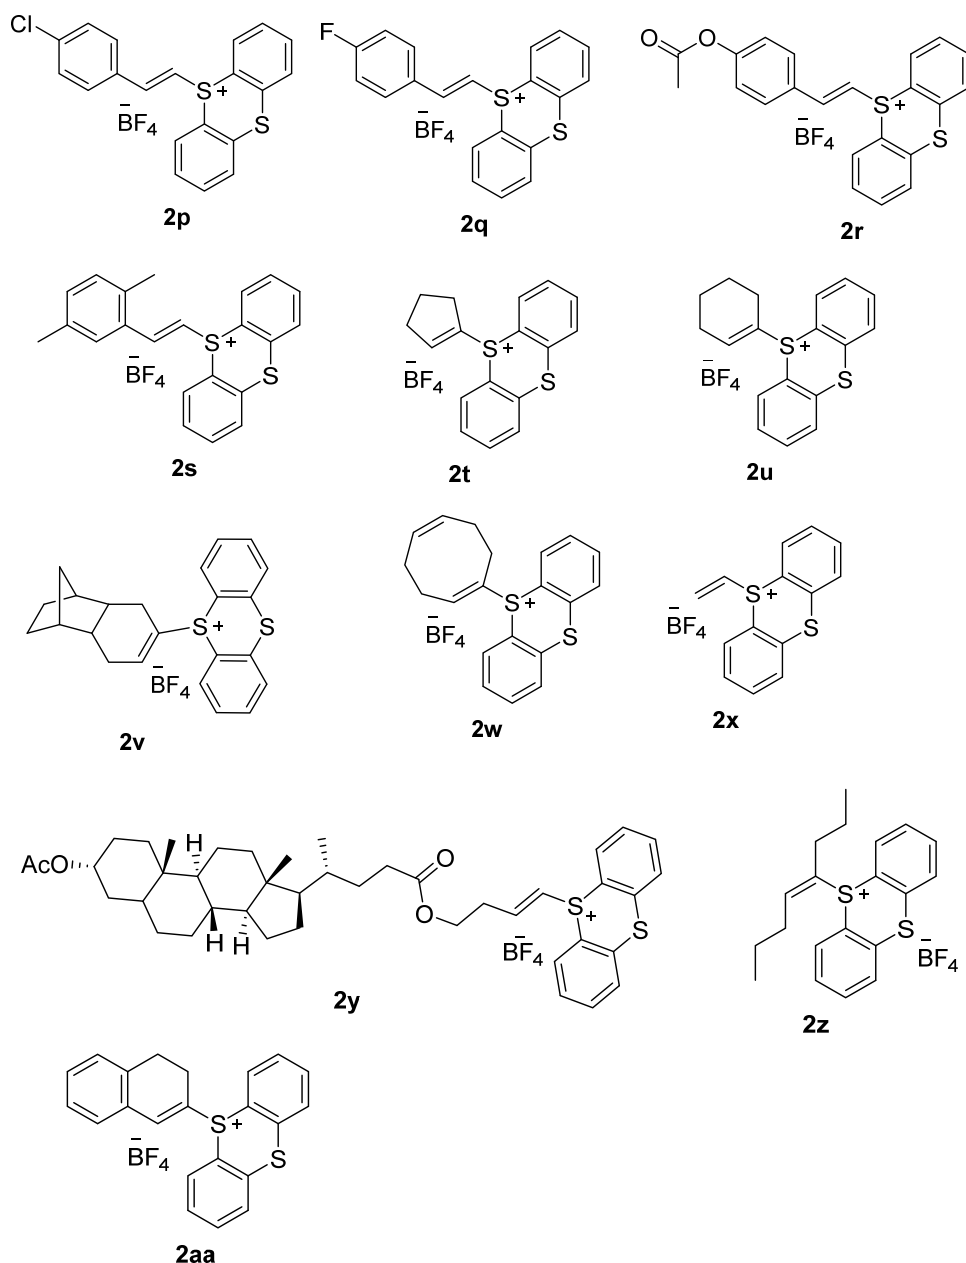

Alkenyl thianthren-5-ium tetrafluoroborate were synthesized following reported procedure.<sup>4-8</sup>

**(*E*)-5-(5-(1,3-Dioxoisindolin-2-yl)pent-1-en-1-yl)-5*H*-thianthren-5-ium tetra-fluoroborate (2c, CAS: 2411696-52-9)**

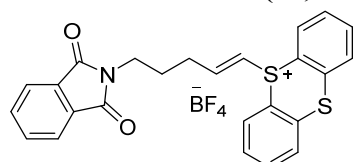

2-(Pent-4-en-1-yl)isoindoline-1,3-dione was used for the reaction to afford **2c** as white solid. <sup>1</sup>H NMR (400 MHz, CDCl<sub>3</sub>) δ 8.39 (dd, *J* = 7.8, 1.2 Hz, 2H), 7.81 (ddd, *J* = 11.6, 6.6, 2.2 Hz, 4H), 7.75 – 7.64 (m, 6H), 7.33 – 7.21 (m, 1H), 6.64 (d, *J* = 14.8 Hz, 1H), 3.60 (t, *J* = 6.8 Hz, 2H), 2.31 (q, *J* = 6.9 Hz, 2H), 1.80 (p, *J* = 7.0 Hz, 2H). The characterization data are consistent with literature.<sup>4</sup>

**(E)-5-(4-Benzamidobut-1-en-1-yl)-5H-thianthren-5-ium tetrafluoroborate (2h, CAS: 2411696-66-5)**

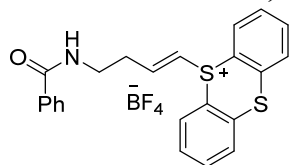

*N*-(but-3-en-1-yl)benzamide was used for the reaction to afford **2h** as white solid.  $^1\text{H}$  NMR (400 MHz,  $\text{CDCl}_3$ )  $\delta$  8.20 (dd,  $J = 7.9, 1.1$  Hz, 2H), 7.77 – 7.70 (m, 4H), 7.65 (td,  $J = 7.7, 1.2$  Hz, 2H), 7.57 (td,  $J = 7.7, 1.3$  Hz, 2H), , 7.47 – 7.39 (m, 2H), 7.33 (t,  $J = 7.5$  Hz, 2H), 6.66 (d,  $J = 14.7$  Hz, 1H), 3.62 (dt,  $J = 6.0, 5.7$  Hz, 2H), 2.66 (dt,  $J = 6.0, 5.7$  Hz, 2H). The characterization data are consistent with literature.<sup>4</sup>

**(E)-5-(4-Bromostyryl)-5H-thianthren-5-ium tetrafluoroborate (2o, CAS: 2829324-90-3)**

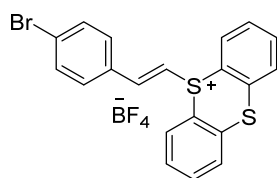

4-Bromostyrene was used for the reaction to afford **2o** as lightly yellow solid.  $^1\text{H}$  NMR (400 MHz,  $\text{CDCl}_3$ )  $\delta$  8.40 (d,  $J = 7.7$  Hz, 2H), 8.05 (d,  $J = 15.0$  Hz, 1H), 7.85 (d,  $J = 7.8$  Hz, 2H), 7.74 (t,  $J = 7.6$  Hz, 2H), 7.67 (t,  $J = 7.6$  Hz, 2H), 7.45 (d,  $J = 7.2$  Hz, 2H), 7.37 (d,  $J = 8.5$  Hz, 2H), 7.12 (d,  $J = 15.0$  Hz, 1H). The characterization data are consistent with literature.<sup>8</sup>

**(E)-5-(4-Chlorostyryl)-5H-thianthren-5-ium tetrafluoroborate (2p, CAS: 2829324-86-7)**

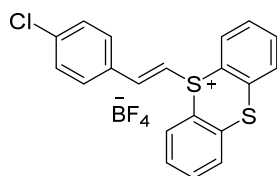

4-Chlorostyrene was used for the reaction to afford **2p** as lightly yellow solid.  $^1\text{H}$  NMR (400 MHz,  $\text{CDCl}_3$ )  $\delta$  8.41 (d,  $J = 7.8$  Hz, 2H), 8.08 (d,  $J = 15.1$  Hz, 1H), 7.85 (dd,  $J = 7.8, 1.2$  Hz, 2H), 7.74 (t,  $J = 7.2$  Hz, 2H), 7.67 (t,  $J = 7.6$  Hz, 2H), 7.45 (d,  $J = 8.5$  Hz, 2H), 7.29 (d,  $J = 8.4$  Hz, 2H), 7.10 (d,  $J = 15.1$  Hz, 1H). The characterization data are consistent with literature.<sup>8</sup>

**(E)-5-(4-Fluorostyryl)-5H-thianthren-5-ium tetrafluoroborate (2q, CAS: 2829324-84-5)**

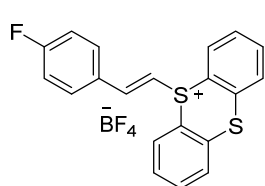

4-Fluorostyrene was used for the reaction to afford **2q** as lightly yellow solid.  $^1\text{H}$  NMR (400 MHz,  $\text{CDCl}_3$ )  $\delta$  8.47 – 8.39 (m, 2H), 8.16 (d,  $J = 15.1$  Hz, 1H), 7.85 (dd,  $J = 7.8, 1.3$  Hz, 2H), 7.74 (td,  $J = 7.8, 1.3$  Hz, 2H), 7.68 (td,  $J = 7.8, 1.3$  Hz, 2H), 7.58 – 7.51 (m, 2H), 7.10 – 6.99 (m, 3H). The characterization data are consistent with literature.<sup>8</sup>

**(E)-5-(4-Acetoxyphenyl)-5H-thianthren-5-ium tetrafluoroborate (2r)**

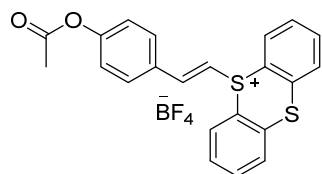

4-Acetoxystyrene was used for the reaction to afford **2r** as lightly yellow solid (0.81 g, 58% yield, 3.0 mmol scale).

**<sup>1</sup>H NMR** (400 MHz, CDCl<sub>3</sub>) δ 8.42 (d, *J* = 7.0 Hz, 2H), 8.11 (d, *J* = 15.1 Hz, 1H), 7.84 (dd, *J* = 7.8, 1.3 Hz, 2H),

7.73 (td, *J* = 7.7, 1.2 Hz, 2H), 7.67 (td, *J* = 7.7, 1.2 Hz, 2H), 7.52 (d, *J* = 7.8 Hz, 2H), 7.12 – 7.02 (m, 3H), 2.27 (s, 3H);

**<sup>13</sup>C NMR** (101 MHz, CDCl<sub>3</sub>) δ 168.9, 153.7, 150.8, 135.8, 134.5, 134.0, 130.6, 130.5, 130.2, 129.8, 122.6, 120.9, 106.2, 21.2;

**<sup>19</sup>F NMR** (376 MHz, CDCl<sub>3</sub>) δ -150.05, -150.10;

**HRMS-ESI** (*m/z*) [*M*-BF<sub>4</sub>]<sup>+</sup> calc'd for C<sub>22</sub>H<sub>17</sub>O<sub>2</sub>S<sub>2</sub><sup>+</sup>, 377.0664, found 377.0663.

**(E)-5-(2,5-Dimethylstyryl)-5H-thianthren-5-ium tetrafluoroborate (2s)**

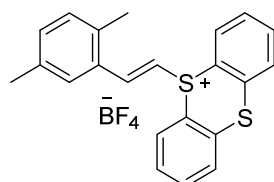

2,5-Dimethylstyrene was used for the reaction to afford **2s** as lightly yellow solid (0.60 g, 46% yield, 3.0 mmol scale). **<sup>1</sup>H NMR** (400 MHz, CDCl<sub>3</sub>) δ 8.48 (d, *J* = 7.8 Hz, 2H), 8.33 (dd,

*J* = 15.0, 3.0 Hz, 1H), 7.84 (d, *J* = 7.1 Hz, 2H), 7.73 (t, *J* = 7.1 Hz, 2H), 7.68 (t, *J* = 7.6 Hz, 2H), 7.16 (s, 1H), 7.13 – 7.00 (m, 3H), 2.40 (s, 3H), 2.24

(s, 3H);

**<sup>13</sup>C NMR** (101 MHz, CDCl<sub>3</sub>) δ 149.7, 136.7, 136.1, 135.7, 134.4, 134.2, 133.2, 131.4, 130.9, 130.5, 130.1, 128.9, 127.8, 127.2, 121.3, 106.3, 20.9, 19.3;

**<sup>19</sup>F NMR** (376 MHz, CDCl<sub>3</sub>) δ -150.23, -150.29;

**HRMS-ESI** (*m/z*) [*M*-BF<sub>4</sub>]<sup>+</sup> calc'd for C<sub>22</sub>H<sub>19</sub>S<sub>2</sub><sup>+</sup>, 347.0923, found 347.0920.

**5-((E)-4-(((4R)-4-((3R,8R,9S,10S,13R,14S,17R)-3-Acetoxy-10,13-dimethylhexadecahydro-1H-cyclopenta[*a*]phenanthren-17-yl)pentanoyl)oxy)but-1-en-1-yl)-5H-thianthren-5-ium tetrafluoroborate (2y, CAS: 2700216-11-9)**

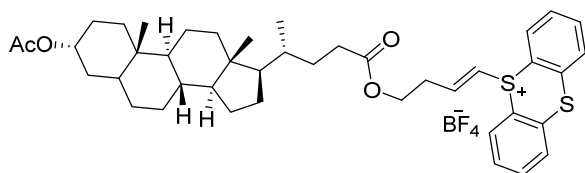

But-3-en-1-yl (4R)-4-((3R,8R,9S,10S, 13R,14S,17R)-3-acetoxy-10,13-dimethylhexadecahydro-1H-cyclo-penta[*a*]phenanthren-17-yl)pentanoate was

used for the reaction to afford **2y** as white solid. **<sup>1</sup>H NMR** (400 MHz, CDCl<sub>3</sub>) δ 8.41 (d, *J* = 7.6 Hz, 2H), 7.83 (dd, *J* = 7.7, 1.4 Hz, 2H), 7.76 – 7.65 (m, 4H), 7.24 – 7.17

(m, 1H), 6.65 (d,  $J = 14.8$  Hz, 1H), 4.72 (dt,  $J = 11.2, 6.5$  Hz, 2H), 4.12 (t,  $J = 6.3$  Hz, 2H), 2.60 (q,  $J = 6.0$  Hz, 2H), 2.25 – 2.18 (m, 1H), 2.14 – 2.06 (m, 2H), 2.03 (s, 3H), 1.98 – 1.91 (m, 2H), 1.87 – 1.75 (m, 4H), 1.71 – 1.63 (m, 2H), 1.55 – 1.50 (m, 1H), 1.47 – 1.33 (m, 6H), 1.27 – 1.15 (m, 4H), 1.10 – 0.99 (m, 5H), 0.93 (s, 3H), 0.85 (d,  $J = 6.5$  Hz, 3H), 0.63 (s, 3H). The characterization data are consistent with literature.<sup>4</sup>

**(Z)-5-(Oct-4-en-4-yl)-5H-thianthren-5-ium tetrafluoroborate (2z, CAS: 2813345-90-1)**

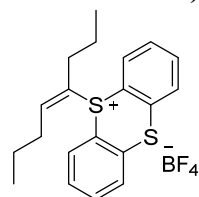

(*E*)-oct-4-ene was used for the reaction to afford **2z** as white solid.

<sup>1</sup>H NMR (400 MHz, CDCl<sub>3</sub>) δ 8.24 (d,  $J = 7.2$  Hz, 2H), 7.77 – 7.63 (m, 6H), 6.34 (t,  $J = 7.6$  Hz, 1H), 2.68 (q,  $J = 7.4$  Hz, 2H), 2.14 (t,  $J = 7.4$  Hz, 2H), 1.49 (h,  $J = 7.4$  Hz, 2H), 1.35 (h,  $J = 7.4$  Hz, 2H), 0.99 (t,  $J = 7.4$  Hz, 3H), 0.75 (t,  $J = 7.4$  Hz, 3H). The characterization data are consistent with literature.<sup>4</sup>

**5-(3,4-Dihydronaphthalen-2-yl)-5H-thianthren-5-ium tetrafluoroborate (2aa)**

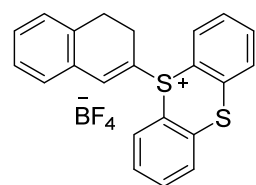

1,2-Dihydronaphthalene was used for the reaction to afford **2z** as white solid (0.90 g, 69% yield, 3.0 mmol scale). <sup>1</sup>H NMR (400 MHz, CDCl<sub>3</sub>) δ 8.49 (d,  $J = 7.7$  Hz, 2H), 7.80 (q,  $J = 7.8, 7.1$  Hz, 4H), 7.75 (t,  $J = 7.3$  Hz, 2H), 7.23 (d,  $J = 7.5$  Hz, 1H), 7.15 (t,  $J = 7.5$  Hz, 1H), 7.07 (d,  $J = 7.4$  Hz, 1H), 7.02 (d,  $J = 7.5$  Hz, 1H), 6.58 (s, 1H), 2.91 (t,  $J = 8.1$  Hz, 2H), 2.35 (t,  $J = 8.1$  Hz, 2H);

<sup>13</sup>C NMR (101 MHz, CDCl<sub>3</sub>) δ 137.7, 136.4, 135.7, 134.9, 134.8, 131.2, 130.7, 130.4, 129.9, 128.9, 128.0, 127.4, 121.5, 117.3, 27.8, 24.1;

<sup>19</sup>F NMR (376 MHz, CDCl<sub>3</sub>) δ -150.92, -150.97;

HRMS-ESI ( $m/z$ ) [ $M-BF_4$ ]<sup>+</sup> calc'd for C<sub>22</sub>H<sub>17</sub>S<sub>2</sub><sup>+</sup>, 345.0766, found 345.0765.

## IV. General Procedure for the Alkene

### Standard Procedure A:

Sodium sulfinate (1.5 equiv) and vinyl thianthrenium salt (1.0 equiv) were placed in a 10.0 mL Schlenk tube which equipped with a magnetic stir bar. After back-filled with nitrogen (this process was repeated three times), DCE (0.1 M) was added. The vial

was sealed and at room temperature with stirring until TLC indicated the complete consumption of thianthrene (typically 10 h). The reaction mixture was evaporated and purified directly by column chromatography to afford the product.

***Standard Procedure B:***

Sodium sulfinate (1.5 equiv) and vinyl thianthrenium salt (1.0 equiv) were placed in a 10.0 mL Schlenk tube which equipped with a magnetic stir bar. After back-filled with nitrogen (this process was repeated three times), DCE (0.1 M) was added. The vial was sealed and at 50 °C with stirring until TLC indicated the complete consumption of thianthrene (typically 10 h). The reaction mixture was evaporated and purified directly by column chromatography to afford the product.

***Standard Procedure C:***

Zn(CN)<sub>2</sub> (1.5 equiv), KF (3.0 equiv) and vinyl thianthrenium salt (1.0 equiv) were placed in a 10.0 mL Schlenk tube which equipped with a magnetic stir bar. After back-filled with nitrogen (this process was repeated three times), CH<sub>3</sub>CN (0.1 M) was added. The vial was sealed and at room temperature with stirring until TLC indicated the complete consumption of thianthrene (typically 10 h). The reaction mixture was evaporated and purified directly by column chromatography to afford the product.

***Standard Procedure D:***

Zn(CN)<sub>2</sub> (1.5 equiv), KF (3.0 equiv) and vinyl thianthrenium salt (1.0 equiv) were placed in a 10.0 mL Schlenk tube which equipped with a magnetic stir bar. After back-filled with nitrogen (this process was repeated three times), CH<sub>3</sub>CN (0.1 M) was added. The vial was sealed and at 50 °C with stirring until TLC indicated the complete consumption of thianthrene (typically 10 h). The reaction mixture was evaporated and purified directly by column chromatography to afford the product.

***Standard Procedure E:***

Nucleophile (1.5 equiv), K<sub>2</sub>CO<sub>3</sub> (1.0 equiv) and vinyl thianthrenium salt (1.0 equiv) were placed in a 10.0 mL Schlenk tube which equipped with a magnetic stir bar. After back-filled with nitrogen (this process was repeated three times), CH<sub>3</sub>CN (0.1 M) was added. The vial was sealed and at room temperature with stirring until TLC indicated

the complete consumption of thianthrene (typically 10 h). The reaction mixture was evaporated and purified directly by column chromatography to afford the product.

#### Standard Procedure F:

Nucleophile (1.5 equiv), Cs<sub>2</sub>CO<sub>3</sub> (1.0 equiv) and vinyl thianthrenium salt (1.0 equiv) were placed in a 10.0 mL Schlenk tube which equipped with a magnetic stir bar. After back-filled with nitrogen (this process was repeated three times), CH<sub>3</sub>CN (0.1 M) was added. The vial was sealed and at room temperature with stirring until TLC indicated the complete consumption of thianthrene (typically 10 h). The reaction mixture was evaporated and purified directly by column chromatography to afford the product.

## V. Gram Scale Synthesis

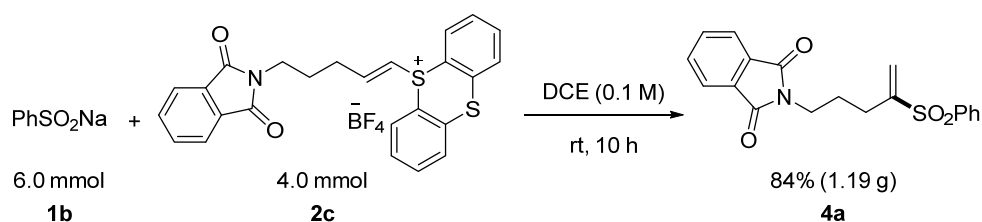

Sodium benzene sulfinate **1b** (985.0 mg, 6.0 mmol, 1.5 equiv), and (*E*)-5-(5-(1,3-dioxoisindolin-2-yl)pent-1-en-1-yl)-5*H*-thianthren-5-ium tetrafluoroborate **2c** (2069.4 mg, 4.0 mmol, 1.0 equiv) were placed in 100 mL Schlenk flask equipped with a magnetic stirring bar. After backfilled with nitrogen (this process was repeated three times), 40.0 mL DCE was added. The flask was sealed at room temperature with stirring for 10 h. The reaction mixture was filtrated and washed with DCM (3 x 20.0 mL). The organic phase was purified directly by column chromatography to afford **4a** as white solid (1193.1 mg, 84% yield).

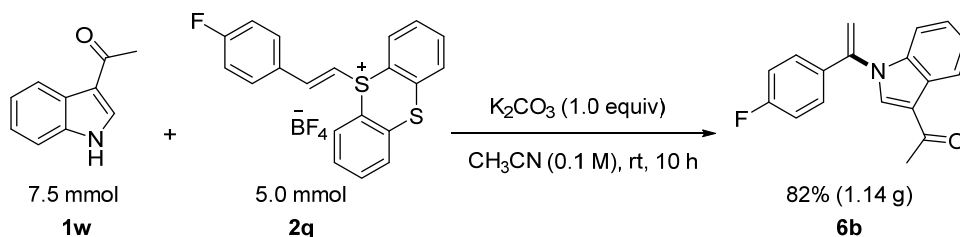

3-Acetylintole **1w** (1208.7 mg, 7.5 mmol, 1.5 equiv), (*E*)-5-(4-fluorostyryl)-5*H*-thianthren-5-ium tetrafluoroborate **2q** (2121.3 mg, 5.0 mmol, 1.0 equiv) and K<sub>2</sub>CO<sub>3</sub> (691.1 mg, mmol, 1.0 equiv) were placed in 100 mL Schlenk flask equipped with a magnetic stirring bar. After backfilled with nitrogen (this process was repeated three times), 50.0 mL CH<sub>3</sub>CN was added. The flask was sealed at room temperature with stirring for 10 h. The reaction mixture was filtrated and washed with DCM (3 x 20.0 mL). The organic phase was purified directly by column chromatography to afford **6b** as lightly yellow solid (1145.3 mg, 82% yield).

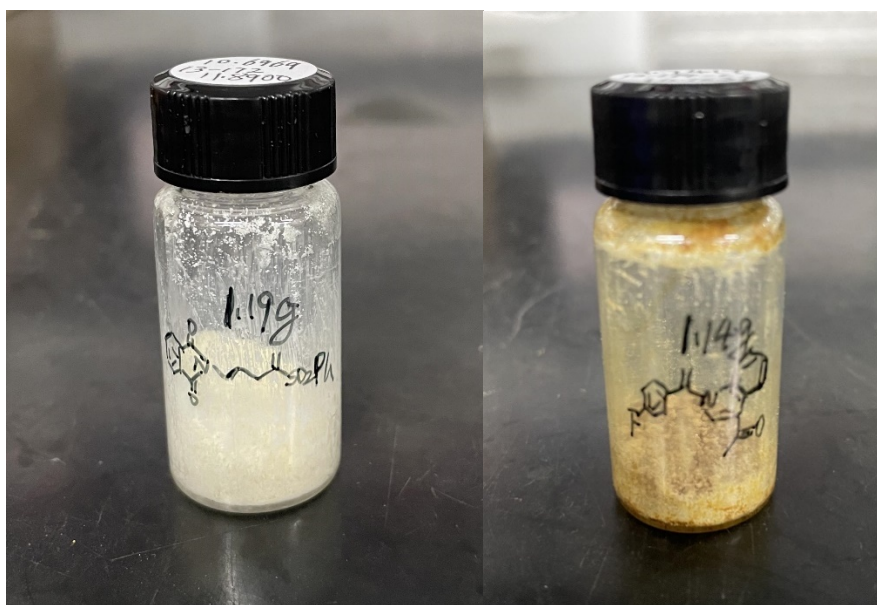

## VI. Characterization of Cross-Coupling Products

### (3-(Methylsulfonyl)but-3-en-1-yl)benzene (**3a**)

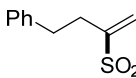
 Following the Standard Procedure A, the reaction of Sodium methyl sulfinate **1a** (15.6 mg, 0.15 mmol, 1.5 equiv) and (*E*)-5-(4-phenylbut-1-en-1-yl)-5*H*-thianthren-5-ium tetrafluoroborate **2a** (43.4 mg, 0.10 mmol, 1.0 equiv) for 10 h afforded product after flash chromatography EA: PE = 0-20% as white solid **3a** (17.5 mg, 83% yield).

**<sup>1</sup>H NMR** (400 MHz, CDCl<sub>3</sub>) δ 7.35 – 7.28 (m, 2H), 7.25 – 7.19 (m, 3H), 6.29 (d, *J* = 1.1 Hz, 1H), 5.75 (d, *J* = 1.1 Hz, 1H), 2.95 (t, *J* = 7.8 Hz, 2H), 2.85 (s, 3H), 2.76 (t, *J* = 7.8 Hz, 2H);

**<sup>13</sup>C NMR** (101 MHz, CDCl<sub>3</sub>) δ 149.5, 140.0, 128.7, 128.6, 126.7, 124.7, 40.8, 34.2, 31.6;

**HRMS-ESI** (m/z) [M+H]<sup>+</sup> calc'd for C<sub>11</sub>H<sub>15</sub>O<sub>2</sub>S<sup>+</sup>, 211.0787, found 211.0785.

### 2-(Methylsulfonyl)oct-1-ene (3b)

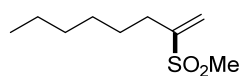

Following the Standard Procedure A, the reaction of Sodium methyl sulfinate **1a** (15.6 mg, 0.15 mmol, 1.5 equiv) and (*E*)-5-(oct-1-en-1-yl)-5*H*-thianthren-5-ium tetrafluoroborate **2b** (41.4 mg, 0.10 mmol, 1.0 equiv) for 10 h afforded product after flash chromatography EA: PE = 0-20% as colorless oil **3b** (14.1 mg, 74% yield).

**<sup>1</sup>H NMR** (600 MHz, CDCl<sub>3</sub>) δ 6.26 (s, 1H), 5.76 (s, 1H), 2.90 (s, 3H), 2.43 (t, *J* = 7.8 Hz, 2H), 1.61 (p, *J* = 7.4 Hz, 2H), 1.43 – 1.35 (m, 2H), 1.34 – 1.27 (m, 4H), 0.89 (t, *J* = 6.9 Hz, 3H);

**<sup>13</sup>C NMR** (151 MHz, CDCl<sub>3</sub>) δ 150.6, 123.6, 41.0, 31.6, 29.8, 28.8, 27.8, 22.7, 14.2;

**HRMS-ESI** (m/z) [M+H]<sup>+</sup> calc'd for C<sub>9</sub>H<sub>19</sub>O<sub>2</sub>S<sup>+</sup>, 191.1100, found 191.1100.

### 2-(4-(Methylsulfonyl)pent-4-en-1-yl)isoindoline-1,3-dione (3c)

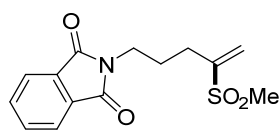

Following the Standard Procedure A, the reaction of Sodium methyl sulfinate **1a** (15.6 mg, 0.15 mmol, 1.5 equiv) and (*E*)-5-(5-(1,3-dioxoisoindolin-2-yl)pent-1-en-1-yl)-5*H*-thianthren-5-ium tetrafluoroborate **2c** (51.7 mg, 0.10 mmol, 1.0 equiv) for 10 h afforded product after flash chromatography EA: PE = 0-20% as white solid **3c** (25.7 mg, 88% yield).

**<sup>1</sup>H NMR** (400 MHz, CDCl<sub>3</sub>) δ 7.87 – 7.81 (m, 2H), 7.72 (m, 2H), 6.30 (s, 1H), 5.86 (s, 1H), 3.76 (t, *J* = 7.1 Hz, 2H), 2.91 (s, 3H), 2.51 (t, *J* = 7.4 Hz, 2H), 2.02 (tt, *J* = 7.4, 7.1 Hz, 2H);

**<sup>13</sup>C NMR** (101 MHz, CDCl<sub>3</sub>) δ 168.4, 149.3, 134.3, 132.1, 124.5, 123.5, 41.1, 37.1, 27.1, 26.7;

**HRMS-ESI** (m/z) [M+H]<sup>+</sup> calc'd for C<sub>14</sub>H<sub>16</sub>NO<sub>4</sub>S<sup>+</sup>, 294.0795, found 294.0792.

### 7-Bromo-2-(methylsulfonyl)hept-1-ene (3d)

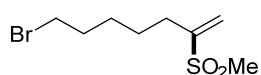

Following the Standard Procedure A, the reaction of Sodium methyl sulfinate **1a** (15.6 mg, 0.15 mmol, 1.5 equiv) and (*E*)-5-(7-bromohept-1-en-1-yl)-5*H*-thianthren-5-ium tetrafluoroborate **2d** (47.9 mg, 0.10 mmol, 1.0 equiv) for 10 h afforded product after flash chromatography EA: PE = 0-20% as colorless oil **3d** (19.6 mg, 77% yield).



**<sup>1</sup>H NMR** (400 MHz, CDCl<sub>3</sub>) δ 6.27 (s, 1H), 5.77 (s, 1H), 3.42 (t, *J* = 6.6 Hz, 2H), 2.91 (s, 3H), 2.46 (t, *J* = 7.6 Hz, 2H), 1.91 (p, *J* = 6.8 Hz, 2H), 1.71 – 1.62 (m, 2H), 1.59 – 1.49 (m, 2H);

**<sup>13</sup>C NMR** (101 MHz, CDCl<sub>3</sub>) δ 150.2, 124.0, 41.0, 33.6, 32.4, 29.7, 27.6, 27.1;

**HRMS-ESI** (*m/z*) [*M*+*H*]<sup>+</sup> calc'd for C<sub>8</sub>H<sub>16</sub>BrO<sub>2</sub>S<sup>+</sup>, 255.0049, found 255.0047.

### 2-(Methylsulfonyl)prop-1-ene (3e)

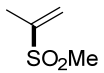 Following the Standard Procedure A, the reaction of Sodium methyl sulfinate **1a** (15.6 mg, 0.15 mmol, 1.5 equiv) and (*E*)-5-(prop-1-en-1-yl)-5*H*-thianthren-5-ium tetrafluoroborate **2e** (34.4 mg, 0.10 mmol, 1.0 equiv) for 10 h afforded product after flash chromatography EA: PE = 0-20% as colorless oil **3e** (6.3 mg, 52% yield).

**<sup>1</sup>H NMR** (400 MHz, CDCl<sub>3</sub>) δ 6.18 (s, 1H), 5.76 (q, *J* = 1.6 Hz, 1H), 2.91 (s, 3H), 2.18 (t, *J* = 1.6 Hz, 3H);

**<sup>13</sup>C NMR** (101 MHz, CDCl<sub>3</sub>) δ 145.9, 125.0, 40.2, 16.8;

**HRMS-ESI** (*m/z*) [*M*+*H*]<sup>+</sup> calc'd for C<sub>4</sub>H<sub>9</sub>O<sub>2</sub>S<sup>+</sup>, 121.0318, found 121.0319.

### (2-(Methylsulfonyl)allyl)benzene (3f)

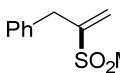 Following the Standard Procedure A, the reaction of Sodium methyl sulfinate **1a** (15.6 mg, 0.15 mmol, 1.5 equiv) and (*E*)-5-(3-phenylprop-1-en-1-yl)-5*H*-thianthren-5-ium tetrafluoroborate **2f** (42.0 mg, 0.10 mmol, 1.0 equiv) for 10 h afforded product after flash chromatography EA: PE = 0-20% as colorless oil **3f** (10.8 mg, 55% yield).

**<sup>1</sup>H NMR** (400 MHz, CDCl<sub>3</sub>) δ 7.36 (dd, *J* = 8.1, 6.5 Hz, 2H), 7.32 – 7.28 (m, 1H), 7.27 – 7.24 (m, 2H), 6.31 (s, 1H), 5.67 (s, 1H), 3.81 (s, 2H), 2.68 (s, 3H);

**<sup>13</sup>C NMR** (101 MHz, CDCl<sub>3</sub>) δ 150.4, 136.0, 129.4, 129.1, 127.6, 126.2, 42.1, 36.8;

**HRMS-ESI** (*m/z*) [*M*+*H*]<sup>+</sup> calc'd for C<sub>10</sub>H<sub>13</sub>O<sub>2</sub>S<sup>+</sup>, 197.0631, found 197.0631.

### 9-(Methylsulfonyl)dec-9-en-1-yl benzoate (3g)

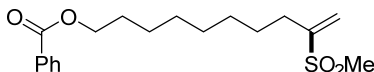 Following the Standard Procedure A, the reaction of Sodium methyl sulfinate **1a** (15.6 mg, 0.15 mmol, 1.5 equiv) and (*E*)-5-(10-(benzoyloxy)dec-1-en-1-yl)-5*H*-thianthren-5-ium tetrafluoroborate **2g** (56.2 mg, 0.10 mmol, 1.0 equiv) for 10 h afforded product after flash chromatography EA: PE = 0-20% as colorless oil **3g** (24.5 mg, 72% yield).

**<sup>1</sup>H NMR** (400 MHz, CDCl<sub>3</sub>) δ 8.07 – 8.01 (m, 2H), 7.58 – 7.52 (m, 1H), 7.47 – 7.40 (m, 2H), 6.25 (s, 1H), 5.75 (s, 1H), 4.31 (t, *J* = 6.6 Hz, 2H), 2.89 (s, 3H), 2.43 (t, *J* = 7.9 Hz, 2H), 1.77 (tt, *J* = 6.9, 6.6 Hz, 2H), 1.62 (tt, *J* = 7.9, 7.3 Hz, 2H), 1.47 – 1.35 (m, 8H);

**<sup>13</sup>C NMR** (101 MHz, CDCl<sub>3</sub>) δ 166.8, 150.5, 133.0, 130.6, 129.6, 128.5, 123.7, 65.1, 41.0, 29.7, 29.3, 29.2, 29.1, 28.8, 27.8, 26.1;

**HRMS-ESI** (*m/z*) [*M*+*H*]<sup>+</sup> calc'd for C<sub>18</sub>H<sub>27</sub>O<sub>4</sub>S<sup>+</sup>, 339.1625, found 339.1622.

### ***N*-(3-(Methylsulfonyl)but-3-en-1-yl)benzamide (3h)**

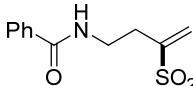 Following the Standard Procedure A, the reaction of Sodium methyl sulfinate **1a** (15.6 mg, 0.15 mmol, 1.5 equiv) and (*E*)-5-(4-benzamidobut-1-en-1-yl)-5*H*-thianthren-5-ium tetrafluoroborate **2h** (47.7 mg, 0.10 mmol, 1.0 equiv) for 10 h afforded product after flash chromatography EA: PE = 0-20% as white solid **3h** (17.9 mg, 71% yield).

**<sup>1</sup>H NMR** (400 MHz, CDCl<sub>3</sub>) δ 7.80 – 7.74 (m, 2H), 7.53 – 7.46 (m, 1H), 7.45 – 7.38 (m, 2H), 6.81 (bs, 1H), 6.34 (s, 1H), 5.90 (s, 1H), 3.74 (dt, *J* = 6.5, 6.2 Hz, 2H), 2.97 (s, 3H), 2.81 (t, *J* = 6.5 Hz, 2H);

**<sup>13</sup>C NMR** (101 MHz, CDCl<sub>3</sub>) δ 167.8, 147.6, 134.1, 131.8, 128.8, 127.0, 126.9, 40.9, 39.2, 30.1;

**HRMS-ESI** (*m/z*) [*M*+*H*]<sup>+</sup> calc'd for C<sub>12</sub>H<sub>16</sub>NO<sub>3</sub>S<sup>+</sup>, 254.0845, found 254.0843.

### **9-(Methylsulfonyl)dec-9-en-1-yl 2,2,2-trifluoroacetate (3i)**

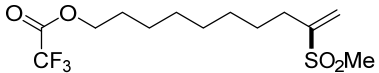 Following the Standard Procedure A, the reaction of Sodium methyl sulfinate **1a** (15.6 mg, 0.15 mmol, 1.5 equiv) and (*E*)-5-(10-(2,2,2-trifluoroacetoxy)dec-1-en-1-yl)-5*H*-thianthren-5-ium tetrafluoroborate **2i** (55.4 mg, 0.10 mmol, 1.0 equiv) for 10 h afforded product after flash chromatography EA: PE = 0-20% as colorless oil **3i** (22.9 mg, 69% yield).

**<sup>1</sup>H NMR** (400 MHz, CDCl<sub>3</sub>) δ 6.25 (s, 1H), 5.75 (s, 1H), 4.34 (t, *J* = 6.6 Hz, 2H), 2.90 (s, 3H), 2.43 (t, *J* = 7.7 Hz, 2H), 1.74 (tt, *J* = 7.2, 6.6 Hz, 2H), 1.61 (tt, *J* = 7.7, 7.0 Hz, 2H), 1.43 – 1.31 (m, 8H);

**<sup>13</sup>C NMR** (101 MHz, CDCl<sub>3</sub>) δ 157.7 (q, *J* = 42.0 Hz), 150.5, 123.7, 114.7 (q, *J* = 285.7 Hz), 68.3, 41.0, 29.7, 29.2, 29.01, 28.99, 28.2, 27.8, 25.6;

**<sup>19</sup>F NMR** (376 MHz, CDCl<sub>3</sub>) δ -75.13;

**HRMS-ESI** (*m/z*) [*M*+*H*]<sup>+</sup> calc'd for C<sub>13</sub>H<sub>22</sub>F<sub>3</sub>O<sub>4</sub>S<sup>+</sup>, 331.1185, found 331.1183.

### 9-(Methylsulfonyl)dec-9-en-1-ol (**3j**)

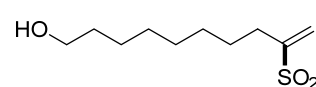

Following the Standard Procedure A, the reaction of Sodium methyl sulfinate **1a** (15.6 mg, 0.15 mmol, 1.5 equiv) and (*E*)-5-(10-hydroxydec-1-en-1-yl)-5*H*-thianthren-5-ium tetrafluoroborate **2j** (45.8 mg, 0.10 mmol, 1.0 equiv) for 10 h afforded product after flash chromatography EA: PE = 0-20% as white solid **3j** (17.5 mg, 75% yield).

<sup>1</sup>H NMR (400 MHz, CDCl<sub>3</sub>) δ 6.25 (s, 1H), 5.75 (s, 1H), 3.63 (t, *J* = 6.6 Hz, 2H), 2.90 (s, 3H), 2.42 (t, *J* = 7.6 Hz, 2H), 1.65 – 1.51 (m, 4H), 1.43 – 1.29 (m, 8H);

<sup>13</sup>C NMR (101 MHz, CDCl<sub>3</sub>) δ 150.5, 123.7, 63.1, 41.0, 32.8, 29.7, 29.3, 29.0, 27.8, 25.8;

HRMS-ESI (*m/z*) [*M*+H]<sup>+</sup> calc'd for C<sub>11</sub>H<sub>23</sub>O<sub>3</sub>S<sup>+</sup>, 235.1362, found 235.1360.

### 2-(Methylsulfonyl)octa-1,7-diene (**3k**)

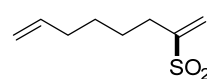

Following the Standard Procedure A, the reaction of Sodium methyl sulfinate **1a** (15.6 mg, 0.15 mmol, 1.5 equiv) and (*E*)-5-(octa-1,7-dien-1-yl)-5*H*-thianthren-5-ium tetrafluoroborate **2k** (41.2 mg, 0.10 mmol, 1.0 equiv) for 10 h afforded product after flash chromatography EA: PE = 0-20% as colorless oil **3k** (13.1 mg, 70% yield).

<sup>1</sup>H NMR (400 MHz, CDCl<sub>3</sub>) δ 6.26 (s, 1H), 5.79 (ddt, *J* = 17.0, 10.2, 6.7 Hz, 1H), 5.76 (s, 1H), 5.02 (dd, *J* = 17.0, 1.8 Hz, 1H), 4.97 (dd, *J* = 10.2, 1.8 Hz, 1H), 2.90 (s, 3H), 2.44 (t, *J* = 7.7 Hz, 2H), 2.10 (dt, *J* = 7.0, 6.7 Hz, 2H), 1.64 (tt, *J* = 8.3, 7.0 Hz, 2H), 1.49 (tt, *J* = 8.3, 7.7 Hz, 2H);

<sup>13</sup>C NMR (101 MHz, CDCl<sub>3</sub>) δ 150.4, 138.3, 123.8, 115.1, 41.0, 33.5, 29.6, 28.3, 27.2;

HRMS-ESI (*m/z*) [*M*+Na]<sup>+</sup> calc'd for C<sub>9</sub>H<sub>16</sub>NaO<sub>2</sub>S<sup>+</sup>, 211.0763, found 211.0764.

### (1-(Methylsulfonyl)vinyl)cyclohexane (**3l**)

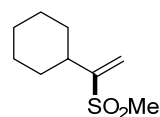

Following the Standard Procedure A, the reaction of Sodium methyl sulfinate **1a** (15.6 mg, 0.15 mmol, 1.5 equiv) and (*E*)-5-(2-cyclohexylvinyl)-5*H*-thianthren-5-ium tetrafluoroborate **2l** (41.2 mg, 0.10 mmol, 1.0 equiv) for 24 h afforded product after flash chromatography EA: PE = 0-20% as colorless oil **3l** (15.3 mg, 81% yield).

<sup>1</sup>H NMR (400 MHz, CDCl<sub>3</sub>) δ 6.27 (s, 1H), 5.79 (s, 1H), 2.90 (s, 3H), 2.46 (tt, *J* =

11.5, 3.4 Hz, 1H), 1.98 (ddt,  $J = 11.5, 3.3, 1.7$  Hz, 2H), 1.82 (dt,  $J = 12.9, 3.3$  Hz, 2H), 1.73 (ddt,  $J = 12.9, 3.4, 1.7$  Hz, 1H), 1.41 – 1.19 (m, 5H);

$^{13}\text{C}$  NMR (101 MHz,  $\text{CDCl}_3$ )  $\delta$  156.3, 123.1, 41.8, 38.8, 33.9, 26.6, 25.8;

HRMS-ESI ( $m/z$ )  $[\text{M}+\text{H}]^+$  calc'd for  $\text{C}_9\text{H}_{17}\text{O}_2\text{S}^+$ , 189.0944, found 189.0944.

#### 4-(1-(Methylsulfonyl)vinyl)-4'-propyl-1,1'-bi(cyclohexane) (3m)

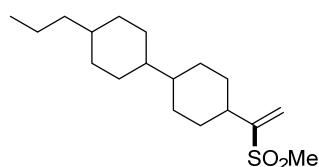

Following the Standard Procedure A, the reaction of Sodium methyl sulfinate **1a** (15.6 mg, 0.15 mmol, 1.5 equiv) and (*E*)-5-(2-(4'-propyl-[1,1'-bi(cyclohexan)]-4-yl) vinyl)-5*H*-thianthren-5-ium tetrafluoroborate **2m** (53.7 mg,

0.10 mmol, 1.0 equiv) for 24 h afforded product after flash chromatography EA: PE = 0-20% as white solid **3m** (26.5 mg, 85% yield).

$^1\text{H}$  NMR (400 MHz,  $\text{CDCl}_3$ )  $\delta$  6.26 (s, 1H), 5.78 (s, 1H), 2.90 (s, 3H), 2.41 (tt,  $J = 12.0, 3.3$  Hz, 1H), 2.08 – 1.98 (m, 2H), 1.86 – 1.64 (m, 6H), 1.35 – 1.21 (m, 4H), 1.19 – 1.08 (m, 6H), 1.07 – 0.91 (m, 3H), 0.90 – 0.77 (m, 5H);

$^{13}\text{C}$  NMR (101 MHz,  $\text{CDCl}_3$ )  $\delta$  156.2, 122.9, 43.3, 42.8, 41.8, 39.9, 38.9, 37.7, 34.0, 33.6, 30.13, 30.06, 20.2, 14.5;

HRMS-ESI ( $m/z$ )  $[\text{M}+\text{H}]^+$  calc'd for  $\text{C}_{18}\text{H}_{33}\text{O}_2\text{S}^+$ , 313.2196, found 313.2192.

#### (1-(Methylsulfonyl)vinyl)benzene (3n)

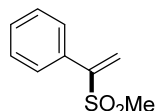

Following the Standard Procedure A, the reaction of Sodium methyl sulfinate **1a** (15.6 mg, 0.15 mmol, 1.5 equiv) and (*E*)-5-styryl-5*H*-thianthren-5-ium tetrafluoroborate **2n** (40.6 mg, 0.10 mmol, 1.0 equiv) for 10 h afforded product after flash chromatography EA: PE = 0-20% as white solid **3n** (13.0 mg, 71% yield).

$^1\text{H}$  NMR (600 MHz,  $\text{CDCl}_3$ )  $\delta$  7.63 (d,  $J = 7.5$  Hz, 2H), 7.47 – 7.41 (m, 3H), 6.54 (s, 1H), 6.02 (s, 1H), 2.80 (s, 3H);

$^{13}\text{C}$  NMR (151 MHz,  $\text{CDCl}_3$ )  $\delta$  150.2, 132.6, 130.0, 129.0, 128.8, 126.1, 40.8;

HRMS-ESI ( $m/z$ )  $[\text{M}+\text{H}]^+$  calc'd for  $\text{C}_9\text{H}_{11}\text{O}_2\text{S}^+$ , 183.0474, found 183.0473.

#### 1-Bromo-4-(1-(methylsulfonyl)vinyl)benzene (3o)

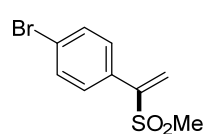

Following the Standard Procedure A, the reaction of Sodium methyl sulfinate **1a** (15.6 mg, 0.15 mmol, 1.5 equiv) and (*E*)-5-(4-bromostyryl)-5*H*-thianthren-5-ium tetrafluoroborate **2o**

(48.5 mg, 0.10 mmol, 1.0 equiv) for 10 h afforded product after flash chromatography EA: PE = 0-20% as light yellow solid **3o** (22.7 mg, 87% yield).

**<sup>1</sup>H NMR** (600 MHz, CDCl<sub>3</sub>) δ 7.59 – 7.54 (m, 2H), 7.53 – 7.48 (m, 2H), 6.55 (s, 1H), 6.03 (s, 1H), 2.80 (s, 3H);

**<sup>13</sup>C NMR** (151 MHz, CDCl<sub>3</sub>) δ 149.3, 132.3, 131.5, 130.3, 126.6, 124.6, 40.8;

**HRMS-ESI** (m/z) [M+H]<sup>+</sup> calc'd for C<sub>9</sub>H<sub>10</sub>BrO<sub>2</sub>S<sup>+</sup>, 260.9579, found 260.9577.

#### 1-Chloro-4-(1-(methylsulfonyl)vinyl)benzene (3p)

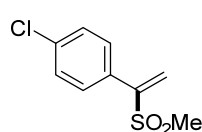

Following the Standard Procedure A, the reaction of Sodium methyl sulfinate **1a** (15.6 mg, 0.15 mmol, 1.5 equiv) and (*E*)-5-(4-chlorostyryl)-5*H*-thianthren-5-ium tetrafluoroborate **2p**

(44.1 mg, 0.10 mmol, 1.0 equiv) for 10 h afforded product after flash chromatography EA: PE = 0-20% as white solid **3p** (13.2 mg, 61% yield).

**<sup>1</sup>H NMR** (400 MHz, CDCl<sub>3</sub>) δ 7.58 (d, *J* = 8.5 Hz, 2H), 7.41 (d, *J* = 8.5 Hz, 2H), 6.55 (s, 1H), 6.03 (s, 1H), 2.80 (s, 3H);

**<sup>13</sup>C NMR** (101 MHz, CDCl<sub>3</sub>) δ 149.2, 136.4, 131.0, 130.1, 129.3, 126.6, 40.8;

**HRMS-ESI** (m/z) [M+H]<sup>+</sup> calc'd for C<sub>9</sub>H<sub>10</sub>ClO<sub>2</sub>S<sup>+</sup>, 217.0085, found 217.0082.

#### 1-Fluoro-4-(1-(methylsulfonyl)vinyl)benzene (3q)

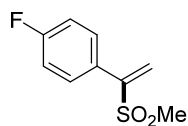

Following the Standard Procedure A, the reaction of Sodium methyl sulfinate **1a** (15.6 mg, 0.15 mmol, 1.5 equiv) and (*E*)-5-(4-fluorostyryl)-5*H*-thianthren-5-ium tetrafluoroborate **2q** (42.4

mg, 0.10 mmol, 1.0 equiv) for 10 h afforded product after flash chromatography EA: PE = 0-20% as white solid **3q** (16.8 mg, 84% yield).

**<sup>1</sup>H NMR** (400 MHz, CDCl<sub>3</sub>) δ 7.67 – 7.58 (m, 2H), 7.16 – 7.07 (m, 2H), 6.54 (s, 1H), 6.01 (s, 1H), 2.79 (s, 3H);

**<sup>13</sup>C NMR** (101 MHz, CDCl<sub>3</sub>) δ 163.8 (d, *J* = 250.7 Hz), 149.3, 130.9 (d, *J* = 8.4 Hz), 128.6 (d, *J* = 3.5 Hz), 126.3, 116.2 (d, *J* = 21.8 Hz), 40.7;

**<sup>19</sup>F NMR** (376 MHz, CDCl<sub>3</sub>) δ -110.61;

**HRMS-ESI** (m/z) [M+H]<sup>+</sup> calc'd for C<sub>9</sub>H<sub>10</sub>FO<sub>2</sub>S<sup>+</sup>, 201.0380, found 201.0378.

#### 4-(1-(Methylsulfonyl)vinyl)phenyl acetate (3r)

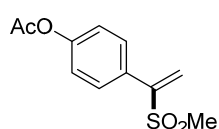

Following the Standard Procedure A, the reaction of Sodium

methyl sulfinate **1a** (15.6 mg, 0.15 mmol, 1.5 equiv) and (*E*)-5-(4-acetoxystyryl)-5*H*-thianthren-5-ium tetrafluoroborate **2r** (46.4 mg, 0.10 mmol, 1.0 equiv) for 10 h afforded product after flash chromatography EA: PE = 0-20% as white solid **3r** (22.2 mg, 92% yield).

**<sup>1</sup>H NMR** (600 MHz, CDCl<sub>3</sub>) δ 7.68 – 7.63 (m, 2H), 7.18 – 7.14 (m, 2H), 6.54 (s, 1H), 6.02 (s, 1H), 2.81 (s, 3H), 2.32 (s, 3H);

**<sup>13</sup>C NMR** (151 MHz, CDCl<sub>3</sub>) δ 169.3, 152.0, 149.4, 130.1, 130.0, 126.4, 122.3, 40.8, 21.3;

**HRMS-ESI** (m/z) [M+H]<sup>+</sup> calc'd for C<sub>11</sub>H<sub>13</sub>O<sub>4</sub>S<sup>+</sup>, 241.0529, found 241.0526.

### 1,4-Dimethyl-2-(1-(methylsulfonyl)vinyl)benzene (3s)

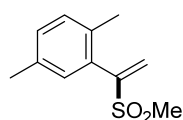

Following the Standard Procedure B, the reaction of Sodium methyl sulfinate **1a** (15.6 mg, 0.15 mmol, 1.5 equiv) and (*E*)-5-(2,5-dimethylstyryl)-5*H*-thianthren-5-ium tetrafluoroborate **2s** (43.4 mg, 0.10 mmol, 1.0 equiv) for 10 h at 50 °C afforded product after flash chromatography EA: PE = 0-20% as white solid **3s** (13.8 mg, 66% yield).

**<sup>1</sup>H NMR** (400 MHz, CDCl<sub>3</sub>) δ 7.20 – 7.12 (m, 3H), 6.67 (s, 1H), 5.87 (s, 1H), 2.80 (s, 3H), 2.33 (s, 3H), 2.31 (s, 3H);

**<sup>13</sup>C NMR** (101 MHz, CDCl<sub>3</sub>) δ 149.6, 135.6, 134.3, 131.7, 130.82, 130.80, 130.6, 127.7, 40.0, 21.0, 19.7;

**HRMS-ESI** (m/z) [M+H]<sup>+</sup> calc'd for C<sub>11</sub>H<sub>15</sub>O<sub>2</sub>S<sup>+</sup>, 211.0787, found 211.0786.

### 1-(Methylsulfonyl)cyclopent-1-ene (3t)

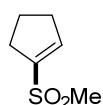

Following the Standard Procedure B, the reaction of Sodium methyl sulfinate **1a** (15.6 mg, 0.15 mmol, 1.5 equiv) and 5-(cyclopent-1-en-1-yl)-5*H*-thianthren-5-ium tetrafluoroborate **2t** (37.0 mg, 0.10 mmol, 1.0 equiv) for 36 h at 50 °C afforded product after flash chromatography EA: PE = 0-20% as white solid **3t** (13.0 mg, 89% yield).

**<sup>1</sup>H NMR** (400 MHz, CDCl<sub>3</sub>) δ 6.75 (p, *J* = 2.2, Hz, 1H), 2.93 (s, 3H), 2.72 (ddt, *J* = 10.3, 7.4, 2.3 Hz, 2H), 2.59 (tq, *J* = 7.7, 2.6 Hz, 2H), 2.19 – 2.10 (m, 2H);

**<sup>13</sup>C NMR** (101 MHz, CDCl<sub>3</sub>) δ 144.1, 144.0, 41.4, 33.1, 31.3, 23.9;

**HRMS-ESI** (m/z) [M+H]<sup>+</sup> calc'd for C<sub>6</sub>H<sub>11</sub>O<sub>2</sub>S<sup>+</sup>, 147.0474, found 147.0474.

### 1-(Methylsulfonyl)cyclohex-1-ene (**3u**)

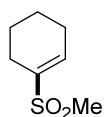

Following the Standard Procedure B, the reaction of Sodium methyl sulfinate **1a** (15.6 mg, 0.15 mmol, 1.5 equiv) and 5-(cyclohex-1-en-1-yl)-5*H*-thianthren-5-ium tetrafluoroborate **2u** (38.4 mg, 0.10 mmol, 1.0 equiv) for 36 h at 50 °C afforded product after flash chromatography EA: PE = 0-20% as white solid **3u** (9.4 mg, 59% yield).

**<sup>1</sup>H NMR** (400 MHz, CDCl<sub>3</sub>) δ 6.94 (tt, *J* = 3.7, 1.8 Hz, 1H), 2.86 (s, 3H), 2.38 (dt, *J* = 6.2, 1.8 Hz, 2H), 2.28 (dt, *J* = 6.2, 3.7 Hz, 2H), 1.82 – 1.73 (m, 2H), 1.71 – 1.61 (m, 2H);

**<sup>13</sup>C NMR** (101 MHz, CDCl<sub>3</sub>) δ 139.5, 139.1, 40.5, 25.5, 23.4, 22.0, 20.9;

**HRMS-ESI** (*m/z*) [*M*+*H*]<sup>+</sup> calc'd for C<sub>7</sub>H<sub>13</sub>O<sub>2</sub>S<sup>+</sup>, 161.0631, found 161.0630.

### 6-(Methylsulfonyl)-1,2,3,4,4a,5,8,8a-octahydro-1,4-methanonaphthalene (**3v**)

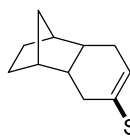

Following the Standard Procedure B, the reaction of Sodium methyl sulfinate **1a** (15.6 mg, 0.15 mmol, 1.5 equiv) and 5-(1,2,3,4,4a,5,8,8a-octahydro-1,4-methanonaphthalen-6-yl)-5*H*-thianthren-5-ium tetrafluoroborate **2v** (45.0 mg, 0.10 mmol, 1.0 equiv) for 36 h at 50 °C afforded product after flash chromatography EA: PE = 0-20% as white solid **3v** (19.1 mg, 84% yield).

**<sup>1</sup>H NMR** (400 MHz, CDCl<sub>3</sub>) δ 7.09 – 6.99 (m, 1H), 2.85 (s, 3H), 2.79 – 2.68 (m, 1H), 2.62 – 2.49 (m, 1H), 2.07 (s, 1H), 2.03 (s, 1H), 1.83 – 1.72 (m, 2H), 1.70 – 1.64 (m, 1H), 1.61 – 1.55 (m, 4H), 1.26 – 1.21 (m, 2H), 1.12 (d, *J* = 10.4 Hz, 1H);

**<sup>13</sup>C NMR** (151 MHz, CDCl<sub>3</sub>) δ 140.8, 140.4, 43.7, 43.2, 43.1, 42.5, 40.9, 33.5, 29.6, 29.5, 29.1, 27.1;

**HRMS-ESI** (*m/z*) [*M*+*H*]<sup>+</sup> calc'd for C<sub>12</sub>H<sub>19</sub>O<sub>2</sub>S<sup>+</sup>, 227.1100, found 227.1099.

### (1*E*,5*Z*)-1-(methylsulfonyl)cycloocta-1,5-diene (**3w**)

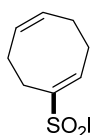

Following the Standard Procedure B, the reaction of Sodium methyl sulfinate **1a** (15.6 mg, 0.15 mmol, 1.5 equiv) and 5-((1*E*,5*Z*)-cycloocta-1,5-dien-1-yl)-5*H*-thianthren-5-ium tetrafluoroborate **2w** (41.0 mg, 0.10 mmol, 1.0 equiv) for 36 h at 50 °C afforded product after flash chromatography EA: PE = 0-20% as colorless oil **3w** (11.9 mg, 64% yield).

**<sup>1</sup>H NMR** (400 MHz, CDCl<sub>3</sub>) δ 6.96 (t, *J* = 6.1 Hz, 1H), 5.61 – 5.56 (m, 2H), 2.89 – 2.81 (m, 5H), 2.62 – 2.51 (m, 4H), 2.45 (q, *J* = 6.1 Hz, 2H);

$^{13}\text{C}$  NMR (101 MHz,  $\text{CDCl}_3$ )  $\delta$  140.9, 140.5, 128.4, 128.2, 41.2, 28.8, 28.0, 26.0, 25.8;

HRMS-ESI ( $m/z$ )  $[\text{M}+\text{H}]^+$  calc'd for  $\text{C}_9\text{H}_{15}\text{O}_2\text{S}^+$ , 187.0787, found 187.0787.

### (Vinylsulfonyl)benzene (3x)

 Following the Standard Procedure A, the reaction of sodium benzene sulfinate **1a** (24.6 mg, 0.15 mmol, 1.5 equiv) and 5-vinyl-5*H*-thianthren-5-ium tetrafluoroborate **2x** (33.0 mg, 0.10 mmol, 1.0 equiv) for 10 h afforded product after flash chromatography EA: PE = 0-20% as white solid **3x** (11.9 mg, 71% yield).

$^1\text{H}$  NMR (400 MHz,  $\text{CDCl}_3$ )  $\delta$  7.93 – 7.87 (m, 2H), 7.67 – 7.61 (m, 1H), 7.59 – 7.51 (m, 2H), 6.66 (dd,  $J$  = 16.6, 9.8 Hz, 1H), 6.46 (d,  $J$  = 16.6 Hz, 1H), 6.04 (d,  $J$  = 9.8 Hz, 1H);

$^{13}\text{C}$  NMR (101 MHz,  $\text{CDCl}_3$ )  $\delta$  139.7, 138.6, 133.8, 129.5, 128.1, 127.9;

HRMS-ESI ( $m/z$ )  $[\text{M}+\text{H}]^+$  calc'd for  $\text{C}_8\text{H}_9\text{O}_2\text{S}^+$ , 169.0318, found 169.0317.

### (Prop-1-en-2-ylsulfonyl)benzene (3y)

 Following the Standard Procedure A, the reaction of sodium benzene sulfinate **1a** (24.6 mg, 0.15 mmol, 1.5 equiv) and (*E*)-5-(prop-1-en-1-yl)-5*H*-thianthren-5-ium tetrafluoroborate **2e** (34.4 mg, 0.10 mmol, 1.0 equiv) for 10 h afforded product after flash chromatography EA: PE = 0-20% as colorless oil **3y** (16.0 mg, 88% yield).

$^1\text{H}$  NMR (400 MHz,  $\text{CDCl}_3$ )  $\delta$  7.94 – 7.85 (m, 2H), 7.69 – 7.60 (m, 1H), 7.58 – 7.50 (m, 2H), 6.28 (s, 1H), 5.71 (q,  $J$  = 1.6 Hz, 1H), 1.96 (dd,  $J$  = 1.6, 1.0 Hz, 3H);

$^{13}\text{C}$  NMR (101 MHz,  $\text{CDCl}_3$ )  $\delta$  146.4, 138.6, 133.6, 129.3, 128.4, 124.4, 16.5;

HRMS-ESI ( $m/z$ )  $[\text{M}+\text{H}]^+$  calc'd for  $\text{C}_9\text{H}_{11}\text{O}_2\text{S}^+$ , 183.0474, found 183.0473.

### 3-(Methylsulfonyl)but-3-en-1-yl (4*R*)-4-((3*R*,8*R*,9*S*,10*S*,13*R*,14*S*,17*R*)-3-acetoxy-10,13-dimethylhexadecahydro-1*H*-cyclopenta[*a*]phenanthren-17-yl)pentanoate (3z)

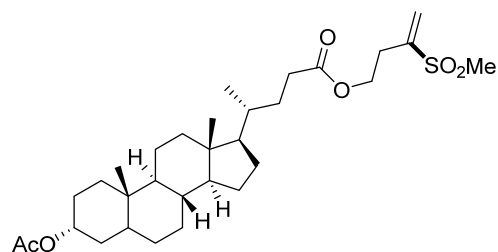

Following the Standard Procedure A, the reaction of Sodium methyl sulfinat **1a** (15.6 mg, 0.15 mmol, 1.5 equiv) and 5-((*E*)-4-(((4*R*)-4-((3*R*,8*R*,9*S*,10*S*,13*R*,14*S*,17



*R*)-3-acetoxy-10,13-dimethylhexadecahydro-1*H*-cyclopenta[*a*]phenanthren-17-yl)pentanoyl)oxy)but-1-en-1-yl)-5*H*-thianthren-5-ium tetrafluoroborate **2y** (77.5 mg, 0.10 mmol, 1.0 equiv) for 10 h afforded product after flash chromatography EA: PE = 0-20% as white solid **3z** (38.8 mg, 70% yield).

**<sup>1</sup>H NMR** (400 MHz, CDCl<sub>3</sub>) δ 6.35 (s, 1H), 5.87 (s, 1H), 4.71 (tt, *J* = 11.1, 4.7 Hz, 1H), 4.33 (t, *J* = 6.6 Hz, 2H), 2.94 (s, 3H), 2.79 (t, *J* = 6.6 Hz, 2H), 2.34 (ddd, *J* = 15.3, 10.1, 5.1 Hz, 1H), 2.21 (ddd, *J* = 15.7, 9.6, 6.4 Hz, 1H), 2.02 (s, 3H), 1.98 – 1.91 (m, 1H), 1.89 – 1.73 (m, 5H), 1.72 – 1.64 (m, 1H), 1.60 – 1.49 (m, 2H), 1.48 – 1.19 (m, 11H), 1.08 (dddd, *J* = 29.1, 24.5, 14.9, 11.6 Hz, 6H), 0.92 (s, 3H), 0.90 (d, *J* = 6.9 Hz, 3H), 0.63 (s, 3H);

**<sup>13</sup>C NMR** (101 MHz, CDCl<sub>3</sub>) δ 174.1, 170.8, 146.8, 126.3, 74.5, 61.6, 56.6, 56.1, 42.9, 42.0, 41.1, 40.5, 40.3, 35.9, 35.5, 35.2, 34.7, 32.4, 31.3, 31.1, 29.4, 28.3, 27.1, 26.8, 26.4, 24.3, 23.5, 21.6, 21.0, 18.4, 12.2;

**HRMS-ESI** (*m/z*) [*M*+Na]<sup>+</sup> calc'd for C<sub>31</sub>H<sub>50</sub>NaO<sub>6</sub>S<sup>+</sup>, 573.3220, found 573.3216.

#### 2-(4-(Phenylsulfonyl)pent-4-en-1-yl)isoindoline-1,3-dione (**4a**)

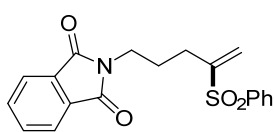

Following the Standard Procedure A, the reaction of sodium benzene sulfinate **1b** (24.6 mg, 0.15 mmol, 1.5 equiv) and (*E*)-5-(5-(1,3-dioxisoindolin-2-yl)pent-1-en-1-yl)-5*H*-thianthren-5-ium tetrafluoroborate **2a** (51.7 mg, 0.10 mmol, 1.0 equiv) for 10 h afforded product after flash chromatography EA: PE = 0-20% as white solid **4a** (29.7 mg, 84% yield).

**<sup>1</sup>H NMR** (600 MHz, CDCl<sub>3</sub>) δ 7.87 – 7.83 (m, 2H), 7.81 (dd, *J* = 5.4, 3.0 Hz, 2H), 7.71 (dd, *J* = 5.5, 3.0 Hz, 2H), 7.63 – 7.57 (m, 1H), 7.51 (t, *J* = 7.8 Hz, 2H), 6.40 (s, 1H), 5.83 (s, 1H), 3.61 (t, *J* = 7.2 Hz, 2H), 2.29 (t, *J* = 7.7 Hz, 2H), 1.85 (p, *J* = 7.4 Hz, 2H);

**<sup>13</sup>C NMR** (151 MHz, CDCl<sub>3</sub>) δ 168.3, 149.5, 138.7, 134.2, 133.7, 132.1, 129.4, 128.4, 123.7, 123.4, 37.0, 26.7, 26.6;

**HRMS-ESI** (*m/z*) [*M*+H]<sup>+</sup> calc'd for C<sub>19</sub>H<sub>18</sub>NO<sub>4</sub>S<sup>+</sup>, 356.0951, found 356.0948.

#### 2-(4-((4-Methoxyphenyl)sulfonyl)pent-4-en-1-yl)isoindoline-1,3-dione (**4b**)

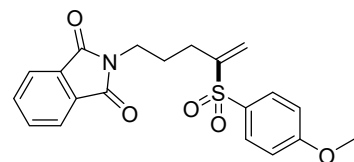

Following the Standard Procedure A, the reaction of sodium 4-methoxybenzenesulfinate **1c** (29.1 mg, 0.15

mmol, 1.5 equiv) and (*E*)-5-(5-(1,3-dioxoisindolin-2-yl)pent-1-en-1-yl)-5*H*-thianthren-5-ium tetrafluoroborate **2a** (51.7 mg, 0.10 mmol, 1.0 equiv) for 10 h afforded product after flash chromatography EA: PE = 0-20% as white solid **4b** (32.8 mg, 85% yield).

**<sup>1</sup>H NMR** (600 MHz, CDCl<sub>3</sub>) δ 7.86 – 7.79 (m, 2H), 7.78 (dd, *J* = 8.8, 3.7 Hz, 2H), 7.73 – 7.68 (m, 2H), 6.96 (dd, *J* = 8.8, 2.9 Hz, 2H), 6.33 (s, 1H), 5.76 (s, 1H), 3.86 (s, 3H), 3.62 (t, *J* = 7.3 Hz, 2H), 2.29 (t, *J* = 7.8 Hz, 2H), 1.84 (tt, *J* = 7.8, 7.3 Hz, 2H);

**<sup>13</sup>C NMR** (151 MHz, CDCl<sub>3</sub>) δ 168.3, 163.8, 150.0, 134.2, 132.1, 130.6, 130.1, 123.4, 122.8, 114.6, 55.8, 37.1, 26.6;

**HRMS-ESI** (*m/z*) [*M*+*H*]<sup>+</sup> calc'd for C<sub>20</sub>H<sub>20</sub>NO<sub>5</sub>S<sup>+</sup>, 386.1057, found 386.1054.

#### *N*-(4-((5-(1,3-Dioxoisindolin-2-yl)pent-1-en-2-yl)sulfonyl)phenyl)acetamide (**4c**)

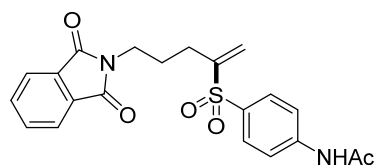

Following the Standard Procedure A, the reaction of sodium 4-acetamidobenzenesulfinate **1d** (33.2 mg, 0.15 mmol, 1.5 equiv) and (*E*)-5-(5-(1,3-dioxoisindolin-2-yl)pent-1-en-1-yl)-5*H*-thianthren-5-ium tetrafluoroborate **2a** (51.7 mg, 0.10 mmol, 1.0 equiv) for 24 h afforded product after flash chromatography EA: PE = 0-20% as white solid **4c** (39.7 mg, 96% yield).

**<sup>1</sup>H NMR** (600 MHz, CDCl<sub>3</sub>) δ 8.07 – 7.94 (bs, 1H), 7.81 (dd, *J* = 5.5, 3.0 Hz, 2H), 7.75 (dd, *J* = 9.0, 2.3 Hz, 2H), 7.72 – 7.65 (m, 4H), 6.35 (s, 1H), 5.81 (d, *J* = 2.0 Hz, 1H), 3.62 (t, *J* = 7.2 Hz, 2H), 2.28 (t, *J* = 7.7 Hz, 2H), 2.20 (s, 3H), 1.85 (p, *J* = 7.5 Hz, 2H);

**<sup>13</sup>C NMR** (151 MHz, CDCl<sub>3</sub>) δ 169.1, 168.4, 149.6, 143.2, 134.2, 132.0, 129.7, 123.5, 123.4, 119.5, 37.1, 26.7, 26.6, 24.8;

**HRMS-ESI** (*m/z*) [*M*+*H*]<sup>+</sup> calc'd for C<sub>21</sub>H<sub>21</sub>N<sub>2</sub>O<sub>5</sub>S<sup>+</sup>, 413.1166, found 413.1163.

#### 2-(4-Tosylpent-4-en-1-yl)isoindoline-1,3-dione (**4d**)

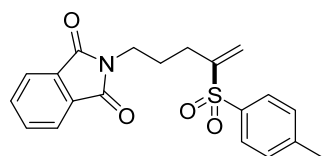

Following the Standard Procedure A, the reaction of Sodium *p*-toluenesulfinate **1e** (26.7 mg, 0.15 mmol, 1.5 equiv) and (*E*)-5-(5-(1,3-dioxoisindolin-2-yl)pent-1-en-1-yl)-5*H*-thianthren-5-ium tetrafluoroborate **2a** (51.7 mg, 0.10 mmol, 1.0 equiv) for 10 h afforded product after flash chromatography EA: PE = 0-20% as white solid **4d** (30.3 mg, 82% yield).

**<sup>1</sup>H NMR** (400 MHz, CDCl<sub>3</sub>) δ 7.82 (dd, *J* = 5.4, 3.0 Hz, 2H), 7.74 – 7.69 (m, 4H), 7.29 (d, *J* = 8.0 Hz, 2H), 6.37 (s, 1H), 5.79 (s, 1H), 3.61 (t, *J* = 7.1 Hz, 2H), 2.41 (s, 3H), 2.28 (t, *J* = 7.8 Hz, 2H), 1.84 (tt, *J* = 7.8, 7.1 Hz, 2H);

**<sup>13</sup>C NMR** (101 MHz, CDCl<sub>3</sub>) δ 168.3, 149.7, 144.7, 135.7, 134.2, 132.1, 130.0, 128.4, 123.4, 123.2, 37.1, 26.7, 26.6, 21.7;

**HRMS-ESI** (*m/z*) [*M*+*H*]<sup>+</sup> calc'd for C<sub>20</sub>H<sub>20</sub>NO<sub>4</sub>S<sup>+</sup>, 370.1108, found 370.1105.

**2-(4-((4-(Trifluoromethyl)phenyl)sulfonyl)pent-4-en-1-yl)isoindoline-1,3-dione (4e)**

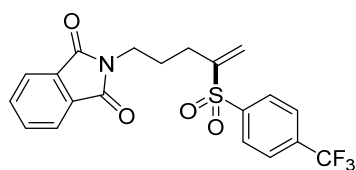

Following the Standard Procedure A, the reaction of sodium 4-(trifluoromethyl)benzenesulfinate **1f** (34.8 mg, 0.15 mmol, 1.5 equiv) and (*E*)-5-(5-(1,3-dioxo

-isoindolin-2-yl)pent-1-en-1-yl)-5*H*-thianthren-5-ium tetrafluoroborate **2a** (51.7 mg, 0.10 mmol, 1.0 equiv) for 24 h afforded product after flash chromatography EA: PE = 0-20% as white solid **4e** (25.9 mg, 61% yield).

**<sup>1</sup>H NMR** (600 MHz, CDCl<sub>3</sub>) δ 7.99 (d, *J* = 8.1 Hz, 2H), 7.82 (dd, *J* = 5.4, 3.1 Hz, 2H), 7.78 (d, *J* = 8.1 Hz, 2H), 7.72 (dd, *J* = 5.5, 3.0 Hz, 2H), 6.47 (s, 1H), 5.92 (s, 1H), 3.65 (t, *J* = 7.1 Hz, 2H), 2.28 (t, *J* = 7.7 Hz, 2H), 1.88 (p, *J* = 7.4 Hz, 2H);

**<sup>13</sup>C NMR** (151 MHz, CDCl<sub>3</sub>) δ 168.3, 149.0, 142.5, 135.4 (q, *J* = 33.2 Hz), 134.3, 132.0, 129.0, 126.6 (q, *J* = 3.8 Hz), 125.1, 123.4, 123.2 (q, *J* = 273.2 Hz), 37.0, 26.8, 26.5;

**<sup>19</sup>F NMR** (565 MHz, CDCl<sub>3</sub>) δ -63.17;

**HRMS-ESI** (*m/z*) [*M*+*H*]<sup>+</sup> calc'd for C<sub>20</sub>H<sub>17</sub>F<sub>3</sub>NO<sub>4</sub>S<sup>+</sup>, 424.0825, found 424.0821.

**2-(4-((4-Fluorophenyl)sulfonyl)pent-4-en-1-yl)isoindoline-1,3-dione (4f)**

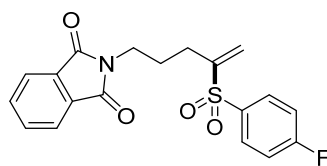

Following the Standard Procedure A, the reaction of sodium 4-fluorobenzenesulfinate **1g** (27.3 mg, 0.15 mmol, 1.5 equiv) and (*E*)-5-(5-(1,3-dioxoisoindolin-2-yl)pent-1-en-1-yl)-5*H*-thianthren-5-ium tetrafluoroborate **2a** (51.7

mg, 0.10 mmol, 1.0 equiv) for 10 h afforded product after flash chromatography EA: PE = 0-20% as white solid **4f** (30.6 mg, 82% yield).

**<sup>1</sup>H NMR** (400 MHz, CDCl<sub>3</sub>) δ 7.88 – 7.79 (m, 4H), 7.71 (dd, *J* = 5.4, 3.1 Hz, 2H), 7.21 – 7.13 (m, 2H), 6.39 (s, 1H), 5.83 (s, 1H), 3.63 (t, *J* = 7.1 Hz, 2H), 2.28 (t, *J* = 7.8 Hz, 2H), 1.92 – 1.81 (m, 2H);

**<sup>13</sup>C NMR** (101 MHz, CDCl<sub>3</sub>) δ 168.3, 165.9 (d, *J* = 256.4 Hz), 149.4, 134.8 (d, *J* = 3.2 Hz), 134.2, 132.0, 131.2 (d, *J* = 9.5 Hz), 123.9, 123.4, 116.7 (d, *J* = 22.6 Hz), 37.0, 26.6, 26.5;

**<sup>19</sup>F NMR** (376 MHz, CDCl<sub>3</sub>) δ -103.53;

**HRMS-ESI** (*m/z*) [*M*+*H*]<sup>+</sup> calc'd for C<sub>19</sub>H<sub>17</sub>FNO<sub>4</sub>S<sup>+</sup>, 374.0857, found 374.0854.

#### 2-(4-((4-Chlorophenyl)sulfonyl)pent-4-en-1-yl)isoindoline-1,3-dione (**4g**)

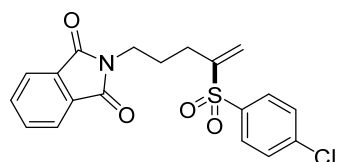

Following the Standard Procedure A, the reaction of sodium 4-chlorobenzenesulfinate **1h** (29.8 mg, 0.15 mmol, 1.5 equiv) and (*E*)-5-(5-(1,3-dioxoisindolin-2-yl)pent-1-en-1-yl)-5*H*-thianthren-5-ium tetrafluoroborate **2a**

(51.7 mg, 0.10 mmol, 1.0 equiv) for 10 h afforded product after flash chromatography EA: PE = 0-20% as white solid **4g** (33.6 mg, 86% yield).

**<sup>1</sup>H NMR** (400 MHz, CDCl<sub>3</sub>) δ 7.83 (dd, *J* = 5.5, 3.1 Hz, 2H), 7.80 – 7.76 (m, 2H), 7.72 (dd, *J* = 5.5, 3.0 Hz, 2H), 7.51 – 7.46 (m, 2H), 6.41 (s, 1H), 5.86 (s, 1H), 3.64 (t, *J* = 7.1 Hz, 2H), 2.28 (t, *J* = 7.7 Hz, 2H), 1.87 (p, *J* = 7.4 Hz, 2H);

**<sup>13</sup>C NMR** (101 MHz, CDCl<sub>3</sub>) δ 168.3, 149.3, 140.5, 137.3, 134.2, 132.0, 129.9, 129.7, 124.2, 123.4, 37.0, 26.7, 26.5;

**HRMS-ESI** (*m/z*) [*M*+*H*]<sup>+</sup> calc'd for C<sub>19</sub>H<sub>17</sub>ClNO<sub>4</sub>S<sup>+</sup>, 390.0561, found 390.0558.

#### 2-(4-((4-Bromophenyl)sulfonyl)pent-4-en-1-yl)isoindoline-1,3-dione (**4h**)

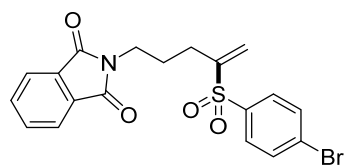

Following the Standard Procedure A, the reaction of sodium 4-bromobenzenesulfinate **1i** (36.5 mg, 0.15 mmol, 1.5 equiv) and (*E*)-5-(5-(1,3-dioxoisindolin-2-yl)pent-1-en-1-yl)-5*H*-thianthren-5-ium tetrafluoroborate **2a**

(51.7 mg, 0.10 mmol, 1.0 equiv) for 24 h afforded product after flash chromatography EA: PE = 0-20% as white solid **4h** (34.0 mg, 78% yield).

**<sup>1</sup>H NMR** (400 MHz, CDCl<sub>3</sub>) δ 7.84 (dd, *J* = 5.4, 3.0 Hz, 2H), 7.75 – 7.69 (m, 4H), 7.68 – 7.63 (m, 2H), 6.42 (s, 1H), 5.86 (s, 1H), 3.65 (t, *J* = 7.1 Hz, 2H), 2.28 (t, *J* = 7.7 Hz, 2H), 1.88 (tt, *J* = 7.7, 7.1 Hz, 2H);

**<sup>13</sup>C NMR** (101 MHz, CDCl<sub>3</sub>) δ 168.3, 149.2, 137.8, 134.2, 132.7, 132.0, 129.9, 129.1, 124.2, 123.4, 37.0, 26.6, 26.5;

**HRMS-ESI** (*m/z*) [*M*+*H*]<sup>+</sup> calc'd for C<sub>19</sub>H<sub>17</sub>BrNO<sub>4</sub>S<sup>+</sup>, 434.0056, found 434.0049.

#### 2-(4-((4-Iodophenyl)sulfonyl)pent-4-en-1-yl)isoindoline-1,3-dione (**4i**)

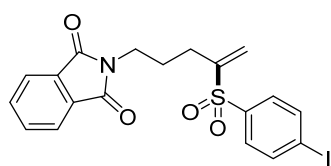

Following the Standard Procedure A, the reaction of sodium 4-iodobenzenesulfinate **1j** (43.5 mg, 0.15 mmol, 1.5 equiv) and (*E*)-5-(5-(1,3-dioxoisindolin-2-yl)pent-1-en-1-yl)-5*H*-thianthren-5-ium tetrafluoroborate **2a** (51.7 mg, 0.10 mmol, 1.0 equiv) for 24 h afforded product after flash chromatography EA: PE = 0-20% as white solid **4i** (38.2 mg, 79% yield).

**<sup>1</sup>H NMR** (400 MHz, CDCl<sub>3</sub>) δ 7.89 – 7.85 (m, 2H), 7.83 (dd, *J* = 5.4, 3.1 Hz, 2H), 7.73 (dd, *J* = 5.5, 3.1 Hz, 2H), 7.57 – 7.53 (m, 2H), 6.41 (s, 1H), 5.85 (s, 1H), 3.64 (t, *J* = 7.1 Hz, 2H), 2.28 (t, *J* = 7.7 Hz, 2H), 1.87 (tt, *J* = 7.7, 7.1 Hz, 2H);

**<sup>13</sup>C NMR** (101 MHz, CDCl<sub>3</sub>) δ 168.3, 149.3, 138.7, 138.5, 134.3, 132.1, 129.8, 124.2, 123.5, 101.7, 37.0, 26.7, 26.5;

**HRMS-ESI** (*m/z*) [*M*+*H*]<sup>+</sup> calc'd for C<sub>19</sub>H<sub>17</sub>INO<sub>4</sub>S<sup>+</sup>, 481.9917, found 481.9912.

#### 2-(4-((3,5-Difluorophenyl)sulfonyl)pent-4-en-1-yl)isoindoline-1,3-dione (**4j**)

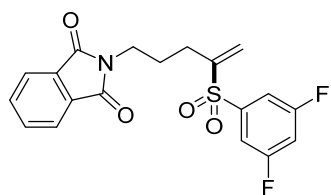

Following the Standard Procedure A, the reaction of sodium 3,5-difluorobenzenesulfinate **1k** (30.0 mg, 0.15 mmol, 1.5 equiv) and (*E*)-5-(5-(1,3-dioxoisindolin-2-yl)pent-1-en-1-yl)-5*H*-thianthren-5-ium tetrafluoroborate **2a** (51.7 mg, 0.10 mmol, 1.0 equiv) for 24 h afforded product after flash chromatography EA: PE = 0-20% as white solid **4j** (29.6 mg, 76% yield).

**<sup>1</sup>H NMR** (600 MHz, CDCl<sub>3</sub>) δ 7.83 (dd, *J* = 5.5, 3.1 Hz, 2H), 7.72 (dd, *J* = 5.5, 3.1 Hz, 2H), 7.43 – 7.35 (m, 2H), 7.09 – 7.02 (m, 1H), 6.46 (s, 1H), 5.94 (s, 1H), 3.66 (t, *J* = 7.1 Hz, 2H), 2.30 (t, *J* = 7.7 Hz, 2H), 1.90 (tt, *J* = 7.7, 7.1 Hz, 2H);

**<sup>13</sup>C NMR** (151 MHz, CDCl<sub>3</sub>) δ 168.4, 163.0 (dd, *J* = 255.8, 11.4 Hz), 148.7, 142.4 (t, *J* = 8.0 Hz), 134.3, 132.0, 125.4, 123.5, 111.9 (dd, *J* = 21.7, 6.4 Hz), 109.5 (t, *J* = 25.0 Hz), 37.0, 26.7, 26.5;

**<sup>19</sup>F NMR** (376 MHz, CDCl<sub>3</sub>) δ -104.85;

**HRMS-ESI** (*m/z*) [*M*+*H*]<sup>+</sup> calc'd for C<sub>19</sub>H<sub>16</sub>F<sub>2</sub>NO<sub>4</sub>S<sup>+</sup>, 392.0763, found 392.0760.

#### 2-(4-((2-Fluorophenyl)sulfonyl)pent-4-en-1-yl)isoindoline-1,3-dione (**4k**)

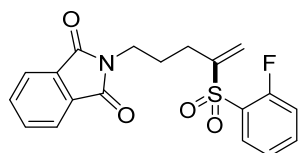

Following the Standard Procedure A, the reaction of sodium 2-fluorobenzenesulfinate **1l** (27.3 mg, 0.15 mmol, 1.5 equiv)

and (*E*)-5-(5-(1,3-dioxoisindolin-2-yl)pent-1-en-1-yl)-5*H*-thianthren-5-ium tetrafluoroborate **2a** (51.7 mg, 0.10 mmol, 1.0 equiv) for 10 h afforded product after flash chromatography EA: PE = 0-20% as white solid **4k** (22.4 mg, 60% yield).

**<sup>1</sup>H NMR** (400 MHz, CDCl<sub>3</sub>) δ 7.95 (t, *J* = 7.7 Hz, 1H), 7.86 – 7.79 (m, 2H), 7.76 – 7.69 (m, 2H), 7.65 – 7.58 (m, 1H), 7.30 (t, *J* = 7.7 Hz, 1H), 7.17 (t, *J* = 7.7 Hz, 1H), 6.50 (s, 1H), 5.96 (s, 1H), 3.63 (t, *J* = 7.1 Hz, 2H), 2.31 (t, *J* = 7.7 Hz, 2H), 1.88 (tt, *J* = 7.7, 7.1 Hz, 2H);

**<sup>13</sup>C NMR** (101 MHz, CDCl<sub>3</sub>) δ 168.3, 159.7 (d, *J* = 258.1 Hz), 148.8, 136.4 (d, *J* = 8.5 Hz), 134.2, 132.1, 131.1, 126.7 (d, *J* = 13.8 Hz), 125.5 (d, *J* = 1.9 Hz), 124.8 (d, *J* = 3.9 Hz), 123.4, 117.5 (d, *J* = 21.1 Hz), 37.0, 26.7, 26.6;

**<sup>19</sup>F NMR** (376 MHz, CDCl<sub>3</sub>) δ -107.33;

**HRMS-ESI** (m/z) [M+H]<sup>+</sup> calc'd for C<sub>19</sub>H<sub>17</sub>FNO<sub>4</sub>S<sup>+</sup>, 374.0857, found 374.0855.

#### 2-(4-(Naphthalen-2-ylsulfonyl)pent-4-en-1-yl)isoindoline-1,3-dione (**4l**)

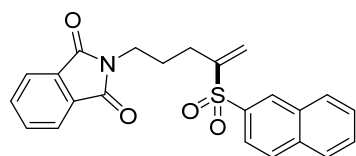

Following the Standard Procedure A, the reaction of sodium naphthalene-2-sulfinate **1m** (32.1 mg, 0.15 mmol, 1.5 equiv) and (*E*)-5-(5-(1,3-dioxoisindolin-2-yl)pent-1-en-1-yl)-5*H*-thianthren-5-ium tetrafluoroborate **2a** (51.7 mg, 0.10 mmol, 1.0 equiv) for 10 h afforded product after flash chromatography EA: PE = 0-20% as white solid **4l** (32.1 mg, 79% yield).

**<sup>1</sup>H NMR** (400 MHz, CDCl<sub>3</sub>) δ 8.47 (d, *J* = 1.9 Hz, 1H), 7.96 (dd, *J* = 11.3, 8.3 Hz, 2H), 7.90 (d, *J* = 8.0 Hz, 1H), 7.79 – 7.74 (m, 3H), 7.71 – 7.59 (m, 4H), 6.47 (s, 1H), 5.87 (s, 1H), 3.61 (t, *J* = 7.1 Hz, 2H), 2.33 (t, *J* = 7.7 Hz, 2H), 1.88 (tt, *J* = 7.7, 7.1 Hz, 2H);

**<sup>13</sup>C NMR** (101 MHz, CDCl<sub>3</sub>) δ 168.3, 149.5, 135.5, 135.4, 134.1, 132.3, 132.0, 130.3, 129.7, 129.6, 129.4, 128.1, 127.8, 123.9, 123.4, 123.0, 37.0, 26.7, 26.5;

**HRMS-ESI** (m/z) [M+H]<sup>+</sup> calc'd for C<sub>23</sub>H<sub>20</sub>NO<sub>4</sub>S<sup>+</sup>, 406.1108, found 406.1103.

#### 2-(4-(Thiophen-2-ylsulfonyl)pent-4-en-1-yl)isoindoline-1,3-dione (**4m**)

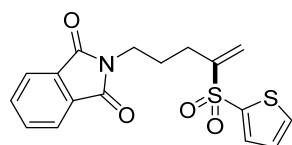

Following the Standard Procedure A, the reaction of sodium thiophene-2-sulfinate **1n** (25.5 mg, 0.15 mmol, 1.5 equiv) and (*E*)-5-(5-(1,3-dioxoisindolin-2-yl)pent-1-en-1-yl)-5*H*-thianthren-5-ium tetrafluoroborate **2a** (51.7 mg, 0.10 mmol, 1.0 equiv) for 10 h afforded product after flash chromatography EA: PE = 0-20% as white solid **4m** (32.1

mg, 89% yield).

**<sup>1</sup>H NMR** (400 MHz, CDCl<sub>3</sub>) δ 7.83 (dd, *J* = 5.6, 2.2 Hz, 2H), 7.72 (dd, *J* = 5.6, 2.2 Hz, 2H), 7.68 (dd, *J* = 4.9, 1.3 Hz, 1H), 7.65 (p, *J* = 1.9 Hz, 1H), 7.11 (dd, *J* = 4.9, 3.6 Hz, 1H), 6.40 (d, *J* = 2.9 Hz, 1H), 5.84 – 5.76 (m, 1H), 3.66 (t, *J* = 7.2 Hz, 2H), 2.41 (t, *J* = 7.8 Hz, 2H), 1.94 – 1.83 (m, 2H);

**<sup>13</sup>C NMR** (101 MHz, CDCl<sub>3</sub>) δ 168.4, 150.1, 140.0, 134.7, 134.5, 134.2, 132.1, 128.1, 123.5, 123.4, 37.1, 26.8, 26.7;

**HRMS-ESI** (*m/z*) [*M*+*H*]<sup>+</sup> calc'd for C<sub>17</sub>H<sub>16</sub>NO<sub>4</sub>S<sub>2</sub><sup>+</sup>, 362.0515, found 362.0511.

#### **(*E*)-2-(4-(Styrylsulfonyl)pent-4-en-1-yl)isoindoline-1,3-dione (4n)**

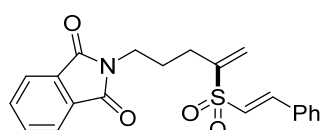

Following the Standard Procedure A, the reaction of sodium (*E*)-2-phenylethene-1-sulfinate **1o** (28.5 mg, 0.15 mmol, 1.5 equiv) and (*E*)-5-(5-(1,3-dioxoisindolin-2-yl)pent-1-en-1-yl)-5*H*-thianthren-5-ium tetrafluoroborate **2a** (51.7 mg, 0.10 mmol, 1.0 equiv) for 10 h afforded product after flash chromatography EA: PE = 0-20% as white solid **4n** (32.1 mg, 84% yield).

**<sup>1</sup>H NMR** (400 MHz, CDCl<sub>3</sub>) δ 7.78 (dd, *J* = 5.4, 3.1 Hz, 2H), 7.69 (dd, *J* = 5.5, 3.0 Hz, 2H), 7.58 (d, *J* = 15.5 Hz, 1H), 7.53 – 7.48 (m, 2H), 7.45 – 7.37 (m, 3H), 6.72 (d, *J* = 15.5 Hz, 1H), 6.35 (s, 1H), 5.86 (s, 1H), 3.72 (t, *J* = 7.1 Hz, 2H), 2.51 – 2.40 (m, 2H), 2.08 – 1.95 (m, 2H);

**<sup>13</sup>C NMR** (101 MHz, CDCl<sub>3</sub>) δ 168.4, 149.0, 145.0, 134.1, 132.5, 132.1, 131.5, 129.2, 128.8, 124.7, 124.3, 123.4, 37.1, 26.7, 26.6;

**HRMS-ESI** (*m/z*) [*M*+*H*]<sup>+</sup> calc'd for C<sub>21</sub>H<sub>20</sub>NO<sub>4</sub>S<sup>+</sup>, 382.1108, found 382.1103.

#### **2-(4-(Allylsulfonyl)pent-4-en-1-yl)isoindoline-1,3-dione (4o)**

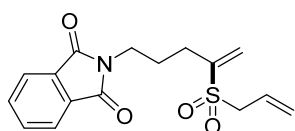

Following the Standard Procedure A, the reaction of sodium prop-2-ene-1-sulfinate **1p** (19.2 mg, 0.15 mmol, 1.5 equiv) and (*E*)-5-(5-(1,3-dioxoisindolin-2-yl)pent-1-en-1-yl)-5*H*-thianthren-5-ium tetrafluoroborate **2a** (51.7 mg, 0.10 mmol, 1.0 equiv) for 10 h afforded product after flash chromatography EA: PE = 0-20% as white solid **4o** (20.7 mg, 65% yield).

**<sup>1</sup>H NMR** (600 MHz, CDCl<sub>3</sub>) δ 7.85 (dd, *J* = 5.5, 2.9 Hz, 2H), 7.73 (dd, *J* = 5.5, 2.9 Hz, 2H), 6.23 (s, 1H), 5.93 (s, 1H), 5.81 (ddd, *J* = 17.1, 10.2, 7.4 Hz, 1H), 5.40 (d, *J* =

10.2 Hz, 1H), 5.35 (d,  $J = 17.1$  Hz, 1H), 3.75 (t,  $J = 7.2$  Hz, 2H), 3.71 (d,  $J = 7.4$  Hz, 2H), 2.46 (t,  $J = 7.7$  Hz, 2H), 2.00 (tt,  $J = 7.7, 7.2$  Hz, 2H);

$^{13}\text{C}$  NMR (151 MHz,  $\text{CDCl}_3$ )  $\delta$  168.4, 147.2, 134.2, 132.1, 126.5, 124.8, 124.6, 123.5, 57.7, 37.1, 27.5, 26.7;

HRMS-ESI ( $m/z$ )  $[\text{M}+\text{H}]^+$  calc'd for  $\text{C}_{16}\text{H}_{18}\text{NO}_4\text{S}^+$ , 320.0951, found 320.0949.

**2-(4-(((1*R*,4*S*)-7,7-Dimethyl-2-oxobicyclo[2.2.1]heptan-1-yl)methyl)sulfonyl)pent-4-en-1-yl)isoindoline-1,3-dione (4p)**

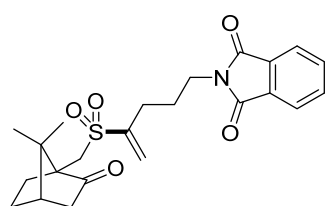

Following the Standard Procedure A, the reaction of sodium ((1*R*,4*S*)-7,7-dimethyl-2-oxobicyclo[2.2.1]heptan-1-yl)methanesulfinate **1q** (35.7 mg, 0.15 mmol, 1.5 equiv) and (*E*)-5-(5-(1,3-dioxoisoindolin-2-yl)pent-1-en-1-yl)-5*H*-thianthren-5-ium tetrafluoroborate **2a** (51.7 mg, 0.10

mmol, 1.0 equiv) for 10 h afforded product after flash chromatography EA: PE = 0-20% as white solid **4p** (30.1 mg, 70% yield).

$^1\text{H}$  NMR (400 MHz,  $\text{CDCl}_3$ )  $\delta$  7.84 (dt,  $J = 6.4, 3.2$  Hz, 2H), 7.72 (dd,  $J = 5.4, 3.0$  Hz, 2H), 6.27 (s, 1H), 5.86 (s, 1H), 3.80 (t,  $J = 7.1$  Hz, 2H), 3.47 (d,  $J = 14.8$  Hz, 1H), 2.77 (d,  $J = 14.8$  Hz, 1H), 2.62 (q,  $J = 7.9$  Hz, 2H), 2.58 – 2.48 (m, 1H), 2.32 (dt,  $J = 18.5, 3.9$  Hz, 1H), 2.13 – 1.98 (m, 4H), 1.89 (d,  $J = 18.5$  Hz, 1H), 1.67 (ddd,  $J = 14.0, 9.3, 4.6$  Hz, 1H), 1.42 (ddd,  $J = 13.1, 9.4, 3.9$  Hz, 1H), 1.10 (s, 3H), 0.86 (s, 3H);

$^{13}\text{C}$  NMR (101 MHz,  $\text{CDCl}_3$ )  $\delta$  214.8, 168.5, 150.2, 134.1, 132.2, 124.6, 123.4, 58.8, 49.5, 48.5, 42.7, 42.6, 37.2, 27.3, 27.2, 26.7, 24.5, 20.0, 19.9;

HRMS-ESI ( $m/z$ )  $[\text{M}+\text{H}]^+$  calc'd for  $\text{C}_{23}\text{H}_{28}\text{NO}_5\text{S}^+$ , 430.1683, found 430.1680.

**2-(4-(Cyclopropylsulfonyl)pent-4-en-1-yl)isoindoline-1,3-dione (4q)**

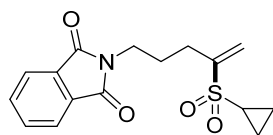

Following the Standard Procedure A, the reaction of sodium cyclopropanesulfinate **1r** (19.2 mg, 0.15 mmol, 1.5 equiv) and (*E*)-5-(5-(1,3-dioxoisoindolin-2-yl)pent-1-en-1-yl)-5*H*

-thianthren-5-ium tetrafluoroborate **2a** (51.7 mg, 0.10 mmol, 1.0 equiv) for 10 h afforded product after flash chromatography EA: PE = 0-20% as white solid **4q** (28.6 mg, 90% yield).

$^1\text{H}$  NMR (400 MHz,  $\text{CDCl}_3$ )  $\delta$  7.86 – 7.81 (m, 2H), 7.75 – 7.68 (m, 2H), 6.21 (s, 1H), 5.79 (s, 1H), 3.76 (t,  $J = 7.1$  Hz, 2H), 2.59 – 2.49 (m, 2H), 2.36 (ddd,  $J = 8.0, 4.8, 1.4$



Hz, 1H), 2.09 – 1.94 (m, 2H), 1.24 – 1.19 (m, 2H), 1.09 – 0.99 (m, 2H);

**<sup>13</sup>C NMR** (101 MHz, CDCl<sub>3</sub>) δ 168.4, 149.1, 134.2, 132.1, 123.6, 123.4, 37.2, 29.6, 27.3, 26.7, 5.6;

**HRMS-ESI** (m/z) [M+H]<sup>+</sup> calc'd for C<sub>16</sub>H<sub>18</sub>NO<sub>4</sub>S<sup>+</sup>, 320.0951, found 320.0949.

#### 1-((1-Phenylvinyl)sulfonyl)naphthalene (**4r**)

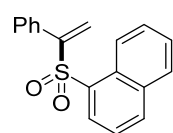

Following the Standard Procedure A, the reaction of sodium naphthalene-1-sulfinate **1s** (32.1 mg, 0.15 mmol, 1.5 equiv) and (*E*)-5-styryl-5*H*-thianthren-5-ium tetrafluoroborate **2a** (40.6 mg, 0.10 mmol, 1.0 equiv) for 10 h afforded product after flash chromatography EA: PE = 0-20% as white solid **4r** (22.2 mg, 75% yield).

**<sup>1</sup>H NMR** (400 MHz, CDCl<sub>3</sub>) δ 8.60 (d, *J* = 8.6 Hz, 1H), 8.13 (dd, *J* = 7.3, 1.3 Hz, 1H), 8.01 (dd, *J* = 8.3, 1.3 Hz, 1H), 7.91 – 7.85 (m, 1H), 7.64 (ddt, *J* = 8.5, 6.9, 1.3 Hz, 1H), 7.57 (tt, *J* = 7.0, 1.2 Hz, 1H), 7.42 (t, *J* = 7.8 Hz, 1H), 7.22 (ddt, *J* = 8.6, 6.0, 3.1 Hz, 1H), 7.17 – 7.09 (m, 4H), 6.77 (s, 1H), 6.05 (s, 1H);

**<sup>13</sup>C NMR** (101 MHz, CDCl<sub>3</sub>) δ 151.6, 135.3, 134.0, 133.0, 132.5, 131.7, 129.3, 129.2, 128.9, 128.8, 128.4, 128.2, 127.0, 125.9, 124.4, 124.3;

**HRMS-ESI** (m/z) [M+H]<sup>+</sup> calc'd for C<sub>18</sub>H<sub>15</sub>O<sub>2</sub>S<sup>+</sup>, 295.0787, found 295.0784.

#### 1,3,5-Trimethyl-2-((1-phenylvinyl)sulfonyl)benzene (**4s**)

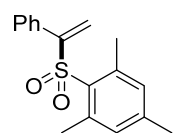

Following the Standard Procedure B, the reaction of sodium 2,4,6-trimethylbenzenesulfinate **1t** (30.9 mg, 0.15 mmol, 1.5 equiv) and (*E*)-5-styryl-5*H*-thianthren-5-ium tetrafluoroborate **2a** (40.6 mg, 0.10 mmol, 1.0 equiv) for 10 h at 50 °C afforded product after flash chromatography EA: PE = 0-20% as white solid **4s** (24.5 mg, 86% yield)

**<sup>1</sup>H NMR** (600 MHz, CDCl<sub>3</sub>) δ 7.34 – 7.29 (m, 1H), 7.26 – 7.19 (m, 4H), 6.84 (s, 2H), 6.44 (s, 1H), 5.88 (s, 1H), 2.45 (s, 6H), 2.25 (s, 3H);

**<sup>13</sup>C NMR** (151 MHz, CDCl<sub>3</sub>) δ 152.0, 143.5, 140.8, 132.8, 132.1, 131.6, 129.3, 129.2, 128.3, 123.9, 22.7, 21.1;

**HRMS-ESI** (m/z) [M+H]<sup>+</sup> calc'd for C<sub>17</sub>H<sub>19</sub>O<sub>2</sub>S<sup>+</sup>, 287.1100, found 287.1096.

#### 2-Methylene-4-phenylbutanenitrile (**5a**)

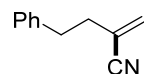

Following the Standard Procedure C, the reaction of Zn(CN)<sub>2</sub> **1u** (17.6

mg, 0.15 mmol, 1.5 equiv), KF (17.4 mg, 0.30 mmol, 3.0 equiv) and (*E*)-5-(4-phenylbut-1-en-1-yl)-5*H*-thianthren-5-ium tetrafluoroborate **2a** (43.4 mg, 0.10 mmol, 1.0 equiv) for 10 h afforded product after flash chromatography EA: PE = 0-5% as colorless oil **5a** (11.0 mg, 70% yield).

**<sup>1</sup>H NMR** (400 MHz, CDCl<sub>3</sub>) δ 7.31 (dd, *J* = 8.1, 6.6 Hz, 2H), 7.25 – 7.21 (m, 1H), 7.21 – 7.17 (m, 2H), 5.83 (s, 1H), 5.64 (s, 1H), 2.89 (t, *J* = 7.3 Hz, 2H), 2.57 (t, *J* = 7.3 Hz, 2H);

**<sup>13</sup>C NMR** (101 MHz, CDCl<sub>3</sub>) δ 139.7, 131.1, 128.7, 128.6, 126.6, 122.5, 118.7, 36.6, 34.0;

**HRMS-ESI** (*m/z*) [*M*+*H*]<sup>+</sup> calc'd for C<sub>11</sub>H<sub>12</sub>N<sup>+</sup>, 158.0964, found 158.0965.

### 2-Cyclohexylacrylonitrile (**5b**)

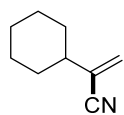

Following the Standard Procedure C, the reaction of Zn(CN)<sub>2</sub> **1u** (17.6 mg, 0.15 mmol, 1.5 equiv), KF (17.4 mg, 0.30 mmol, 3.0 equiv) and (*E*)-5-(2-cyclohexylvinyl)-5*H*-thianthren-5-ium tetrafluoroborate **2l** (41.2 mg, 0.10 mmol, 1.0 equiv) for 10 h afforded product after flash chromatography EA: PE = 0-5% as colorless oil **5b** (7.1 mg, 53% yield).

**<sup>1</sup>H NMR** (400 MHz, CDCl<sub>3</sub>) δ 5.79 (s, 1H), 5.68 (s, 1H), 2.20 – 2.10 (m, 1H), 1.90 – 1.78 (m, 4H), 1.74 – 1.65 (m, 1H), 1.37 – 1.13 (m, 5H);

**<sup>13</sup>C NMR** (101 MHz, CDCl<sub>3</sub>) δ 129.2, 128.1, 118.6, 42.7, 31.4, 25.9, 25.7;

**HRMS-ESI** (*m/z*) [*M*+*H*]<sup>+</sup> calc'd for C<sub>9</sub>H<sub>14</sub>N<sup>+</sup>, 136.1121, found 136.1125.

### 5-(1,3-Dioxoisindolin-2-yl)-2-methylenepentanenitrile (**5c**)

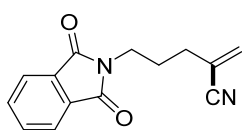

Following the Standard Procedure C, the reaction of Zn(CN)<sub>2</sub> **1u** (17.6 mg, 0.15 mmol, 1.5 equiv), KF (17.4 mg, 0.30 mmol, 3.0 equiv) and (*E*)-5-(5-(1,3-dioxoisindolin-2-yl)pent-1-en-1-yl)-5*H*-thianthren-5-ium tetrafluoroborate **2c** (51.7 mg, 0.10 mmol, 1.0 equiv) for 10 h afforded product after flash chromatography EA: PE = 0-10% as colorless oil **5c** (18.4 mg, 77% yield).

**<sup>1</sup>H NMR** (400 MHz, CDCl<sub>3</sub>) δ 7.85 (dd, *J* = 5.4, 3.1 Hz, 2H), 7.73 (dd, *J* = 5.5, 3.0 Hz, 2H), 5.89 (s, 1H), 5.80 (s, 1H), 3.73 (t, *J* = 6.8 Hz, 2H), 2.32 (t, *J* = 7.7 Hz, 2H), 1.96 (tt, *J* = 7.7, 6.8 Hz, 2H);

**<sup>13</sup>C NMR** (101 MHz, CDCl<sub>3</sub>) δ 168.4, 134.2, 132.1, 131.3, 123.5, 121.9, 118.4, 36.8,

32.0, 26.7;

**HRMS-ESI** (m/z)  $[M+H]^+$  calc'd for  $C_{14}H_{13}N_2O_2^+$ , 241.0972, found 241.0970.

### 9-Cyanodec-9-en-1-yl benzoate (**5d**)

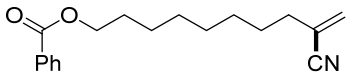 Following the Standard Procedure C, the reaction of  $Zn(CN)_2$  **1u** (17.6 mg, 0.15 mmol, 1.5 equiv), KF (17.4 mg, 0.30 mmol, 3.0 equiv) and (*E*)-5-(10-(benzoyloxy)dec-1-en-1-yl)-5*H*-thianthren-5-ium tetrafluoroborate **2g** (56.2 mg, 0.10 mmol, 1.0 equiv) for 10 h afforded product after flash chromatography EA: PE = 0-10% as colorless oil **5d** (18.7 mg, 66% yield). **<sup>1</sup>H NMR** (400 MHz,  $CDCl_3$ )  $\delta$  8.07 – 8.02 (m, 2H), 7.58 – 7.52 (m, 1H), 7.47 – 7.41 (m, 2H), 5.82 (s, 1H), 5.69 (s, 1H), 4.31 (t,  $J$  = 6.6 Hz, 2H), 2.24 (t,  $J$  = 7.6 Hz, 2H), 1.77 (tt,  $J$  = 6.9, 6.6 Hz, 2H), 1.56 (tt,  $J$  = 7.6, 6.5 Hz, 2H), 1.49 – 1.29 (m, 8H); **<sup>13</sup>C NMR** (101 MHz,  $CDCl_3$ )  $\delta$  166.8, 133.0, 130.6, 130.2, 129.7, 128.5, 123.5, 118.9, 65.2, 34.7, 29.2, 28.8, 28.6, 27.6, 26.1; **HRMS-ESI** (m/z)  $[M+H]^+$  calc'd for  $C_{18}H_{24}NO_2^+$ , 286.1802, found 286.1801.

### 10-Hydroxy-2-methylenedecanenitrile (**5e**)

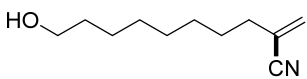 Following the Standard Procedure C, the reaction of  $Zn(CN)_2$  **1u** (17.6 mg, 0.15 mmol, 1.5 equiv), KF (17.4 mg, 0.30 mmol, 3.0 equiv) and (*E*)-5-(10-hydroxydec-1-en-1-yl)-5*H*-thianthren-5-ium tetrafluoroborate **2j** (45.8 mg, 0.10 mmol, 1.0 equiv) for 10 h afforded product after flash chromatography EA: PE = 0-10% as colorless oil **5e** (11.8 mg, 65% yield). **<sup>1</sup>H NMR** (400 MHz,  $CDCl_3$ )  $\delta$  5.83 (s, 1H), 5.69 (s, 1H), 3.64 (t,  $J$  = 6.6 Hz, 2H), 2.24 (t,  $J$  = 7.6 Hz, 2H), 1.60 – 1.52 (m, 4H), 1.38 – 1.29 (m, 8H); **<sup>13</sup>C NMR** (101 MHz,  $CDCl_3$ )  $\delta$  130.3, 123.5, 118.9, 63.1, 34.7, 32.9, 29.4, 29.3, 28.6, 27.6, 25.8; **HRMS-ESI** (m/z)  $[M+H]^+$  calc'd for  $C_{11}H_{20}NO^+$ , 182.1539, found 182.1539.

### 7-Bromo-2-methyleneheptanenitrile (**5f**)

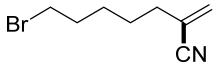 Following the Standard Procedure C, the reaction of  $Zn(CN)_2$  **1u** (17.6 mg, 0.15 mmol, 1.5 equiv), KF (17.4 mg, 0.30 mmol, 3.0 equiv) and (*E*)-5-(7-bromohept-1-en-1-yl)-5*H*-thianthren-5-ium tetrafluoroborate **2d** (47.9 mg, 0.10 mmol, 1.0 equiv) for 10 h afforded product after flash chromatography EA: PE = 0-5% as colorless oil **5f** (16.9 mg, 84% yield).

**<sup>1</sup>H NMR** (400 MHz, CDCl<sub>3</sub>) δ 5.85 (s, 1H), 5.72 (s, 1H), 3.41 (t, *J* = 6.8 Hz, 2H), 2.28 (t, *J* = 7.5 Hz, 2H), 1.89 (tt, *J* = 7.4, 6.8 Hz, 2H), 1.60 (tt, *J* = 7.5, 7.0 Hz, 2H), 1.49 (tt, *J* = 7.0, 6.8 Hz, 2H);

**<sup>13</sup>C NMR** (101 MHz, CDCl<sub>3</sub>) δ 130.6, 123.1, 118.7, 34.6, 33.5, 32.4, 27.3, 26.9;

**HRMS-ESI** (*m/z*) [*M*+*H*]<sup>+</sup> calc'd for C<sub>8</sub>H<sub>13</sub>BrN<sup>+</sup>, 202.0226, found 202.0223.

### 2-Methyleneoct-7-enenitrile (**5g**)

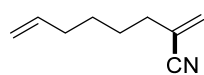

Following the Standard Procedure C, the reaction of Zn(CN)<sub>2</sub> **1u** (17.6 mg, 0.15 mmol, 1.5 equiv), KF (17.4 mg, 0.30 mmol, 3.0 equiv) and (*E*)-5-(octa-1,7-dien-1-yl)-5*H*-thianthren-5-ium tetrafluoroborate **2k** (41.2 mg, 0.10 mmol, 1.0 equiv) for 10 h afforded product after flash chromatography EA: PE = 0-5% as colorless oil **5g** (6.4 mg, 47% yield).

**<sup>1</sup>H NMR** (400 MHz, CDCl<sub>3</sub>) δ 5.83 (s, 1H), 5.79 (ddt, *J* = 17.2, 10.2, 7.2 Hz, 1H), 5.70 (s, 1H), 5.01 (dd, *J* = 17.2, 1.9 Hz, 1H), 4.97 (dd, *J* = 10.2, 1.9 Hz, 1H), 2.26 (t, *J* = 7.5 Hz, 2H), 2.08 (dt, *J* = 7.2, 7.0 Hz, 2H), 1.63 – 1.54 (m, 2H), 1.48 – 1.39 (m, 2H);

**<sup>13</sup>C NMR** (101 MHz, CDCl<sub>3</sub>) δ 138.4, 130.3, 123.4, 118.9, 115.0, 34.6, 33.4, 28.0, 27.1;

**HRMS-ESI** (*m/z*) [*M*+*H*]<sup>+</sup> calc'd for C<sub>9</sub>H<sub>14</sub>N<sup>+</sup>, 136.1121, found 136.1122.

### 1,2,3,4,4a,5,8,8a-Octahydro-1,4-methanonaphthalene-6-carbonitrile (**5h**)

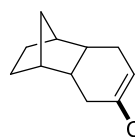

Following the Standard Procedure D, the reaction of Zn(CN)<sub>2</sub> **1u** (17.6 mg, 0.15 mmol, 1.5 equiv), KF (17.4 mg, 0.30 mmol, 3.0 equiv) and 5-(1,2,3,4,4a,5,8,8a-octahydro-1,4-methanonaphthalen-6-yl)-5*H*-thianthren-5-ium tetrafluoroborate **2v** (45.0 mg, 0.10 mmol, 1.0 equiv) at 50 °C for 10 h afforded product after flash chromatography EA: PE = 0-5% as colorless oil **5h** (13.2 mg, 76% yield).

**<sup>1</sup>H NMR** (400 MHz, CDCl<sub>3</sub>) δ 6.85 – 6.77 (m, 1H), 2.49 – 2.37 (m, 2H), 2.00 (s, 2H), 1.77 – 1.67 (m, 2H), 1.62 – 1.53 (m, 5H), 1.28 – 1.19 (m, 2H), 1.09 (d, *J* = 10.3 Hz, 1H);

**<sup>13</sup>C NMR** (151 MHz, CDCl<sub>3</sub>) δ 147.2, 119.6, 113.7, 43.2, 43.0, 42.7, 42.2, 33.4, 30.0, 29.7, 29.6, 29.0;

**HRMS-ESI** (*m/z*) [*M*+*H*]<sup>+</sup> calc'd for C<sub>12</sub>H<sub>16</sub>N<sup>+</sup>, 174.1277, found 174.1278.

### (Z)-2-Propylhex-2-enenitrile (**5i**)

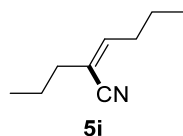

Following the Standard Procedure D, the reaction of  $\text{Zn}(\text{CN})_2$  **1u** (17.6 mg, 0.15 mmol, 1.5 equiv), KF (17.4 mg, 0.30 mmol, 3.0 equiv) and (Z)-5-(oct-4-en-4-yl)-5H-thianthren-5-ium tetrafluoroborate **2z** (41.4 mg, 0.10 mmol, 1.0 equiv) at 50 °C for 10 h afforded product after flash chromatography EA: PE = 0-5% as colorless oil **5i** (6.3 mg, 46% yield, Z/E = 1.6:1).

$^1\text{H}$  NMR (400 MHz,  $\text{CDCl}_3$ )  $\delta$  6.35 (t,  $J$  = 7.6 Hz, 0.43H), 6.13 (t,  $J$  = 7.7 Hz, 0.57H), 2.33 (q,  $J$  = 7.5 Hz, 1.1H), 2.21 – 2.11 (m, 2.9H), 1.63 – 1.53 (m, 1.9H), 1.47 (dq,  $J$  = 14.7, 7.4 Hz, 2.1H), 1.00 – 0.88 (m, 6.0H);

$^{13}\text{C}$  NMR (101 MHz,  $\text{CDCl}_3$ )  $\delta$  147.8, 118.0, 114.8, 36.3, 30.5, 22.1, 21.4, 13.7, 13.2;

HRMS-ESI ( $m/z$ ) [ $\text{M}+\text{H}$ ] $^+$  calc'd for  $\text{C}_9\text{H}_{16}\text{N}^+$ , 138.1277, found 138.1277.

### 2-(2,5-Dimethylphenyl)acrylonitrile (**5j**)

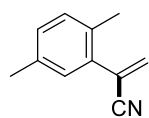

Following the Standard Procedure D, the reaction of  $\text{Zn}(\text{CN})_2$  **1u** (17.6 mg, 0.15 mmol, 1.5 equiv), KF (17.4 mg, 0.30 mmol, 3.0 equiv) and (E)-5-(2,5-dimethylstyryl)-5H-thianthren-5-ium tetrafluoroborate **2s** (43.4 mg, 0.10 mmol, 1.0 equiv) for 24 h at 50 °C afforded product after flash chromatography EA: PE = 0-5% as colorless oil **5j** (11.0 mg, 70% yield).

$^1\text{H}$  NMR (600 MHz,  $\text{CDCl}_3$ )  $\delta$  7.11 (s, 1H), 7.11 (s, 1H), 7.07 (s, 1H), 6.23 (d,  $J$  = 0.5 Hz, 1H), 5.98 (d,  $J$  = 0.5 Hz, 1H), 2.40 (s, 3H), 2.33 (s, 3H);

$^{13}\text{C}$  NMR (151 MHz,  $\text{CDCl}_3$ )  $\delta$  136.2, 133.6, 132.8, 131.0, 130.4, 129.7, 123.5, 118.2, 20.9, 19.7;

HRMS-ESI ( $m/z$ ) [ $\text{M}+\text{H}$ ] $^+$  calc'd for  $\text{C}_{11}\text{H}_{12}\text{N}^+$ , 158.0964, found 158.0965.

### 1-(1-(4-Fluorophenyl)vinyl)-1H-indole (**6a**)

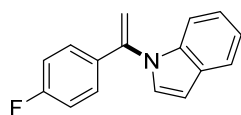

Following the Standard Procedure E, the reaction of indole **1v** (17.6 mg, 0.15 mmol, 1.5 equiv),  $\text{K}_2\text{CO}_3$  (13.8 mg, 0.10 mmol, 1.0 equiv) and (E)-5-(4-fluorostyryl)-5H-thianthren-5-ium tetrafluoroborate **2q** (42.4 mg, 0.10 mmol, 1.0 equiv) for 10 h afforded product after flash chromatography EA: PE = 0-10% as light yellow solid **6a** (19.4 mg, 82% yield).

$^1\text{H}$  NMR (400 MHz,  $\text{CDCl}_3$ )  $\delta$  7.65 – 7.59 (m, 1H), 7.25 (dt,  $J$  = 8.5, 6.1 Hz, 2H), 7.13 (d,  $J$  = 3.3 Hz, 1H), 7.12 – 7.05 (m, 3H), 7.00 (t,  $J$  = 8.6 Hz, 2H), 6.59 (d,  $J$  = 3.3

Hz, 1H), 5.49 (s, 1H), 5.32 (s, 1H);

**<sup>13</sup>C NMR** (101 MHz, CDCl<sub>3</sub>) δ 163.4 (d, *J* = 249.1 Hz), 144.2, 136.4, 133.3 (d, *J* = 3.2 Hz), 129.5, 128.9 (d, *J* = 8.3 Hz), 128.7, 122.2, 121.2, 120.4, 115.8 (d, *J* = 21.8 Hz), 112.0, 108.0 (d, *J* = 1.4 Hz), 103.4;

**<sup>19</sup>F NMR** (376 MHz, CDCl<sub>3</sub>) δ -112.05;

**HRMS-ESI** (*m/z*) [*M*+H]<sup>+</sup> calc'd for C<sub>16</sub>H<sub>13</sub>FN<sup>+</sup>, 238.1027, found 238.1025.

### 1-(1-(1-(4-Fluorophenyl)vinyl)-1*H*-indol-3-yl)ethan-1-one (6b)

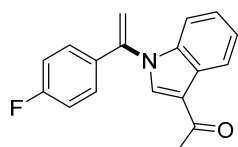

Following the Standard Procedure E, the reaction of 3-acetylindole **1w** (23.9 mg, 0.15 mmol, 1.5 equiv), K<sub>2</sub>CO<sub>3</sub> (13.8 mg, 0.10 mmol, 1.0 equiv) and (*E*)-5-(4-fluorostyryl)-5*H*-thianthren-5-ium tetrafluoroborate **2q** (42.4 mg, 0.10 mmol, 1.0 equiv) for 10 h afforded product after flash chromatography EA: PE = 0-20% as light yellow solid **6b** (22.3 mg, 80% yield).

**<sup>1</sup>H NMR** (400 MHz, CDCl<sub>3</sub>) δ 8.37 (dt, *J* = 8.3, 1.0 Hz, 1H), 7.76 (s, 1H), 7.25 – 7.19 (m, 3H), 7.14 (ddd, *J* = 8.3, 7.0, 1.3 Hz, 1H), 7.06 – 6.93 (m, 3H), 5.67 (s, 1H), 5.42 (s, 1H), 2.50 (s, 3H);

**<sup>13</sup>C NMR** (101 MHz, CDCl<sub>3</sub>) δ 193.5, 163.7 (d, *J* = 250.3 Hz), 143.4, 137.3, 135.1, 132.0 (d, *J* = 3.4 Hz), 128.6 (d, *J* = 8.4 Hz), 126.6, 123.9, 123.2, 122.9, 118.6, 116.1 (d, *J* = 22.0 Hz), 112.0, 110.6 (d, *J* = 1.5 Hz), 27.9;

**<sup>19</sup>F NMR** (376 MHz, CDCl<sub>3</sub>) δ -110.89;

**HRMS-ESI** (*m/z*) [*M*+H]<sup>+</sup> calc'd for C<sub>18</sub>H<sub>15</sub>FNO<sup>+</sup>, 280.1132, found 280.1130.

### 1-(1-(4-Fluorophenyl)vinyl)-1*H*-indole-5-carbaldehyde (6c)

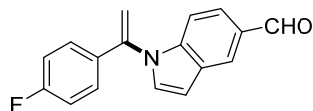

Following the Standard Procedure E, the reaction of indole-5-carboxaldehyde **1x** (21.8 mg, 0.15 mmol, 1.5 equiv), K<sub>2</sub>CO<sub>3</sub> (13.8 mg, 0.10 mmol, 1.0 equiv) and (*E*)-5-(4-fluorostyryl)-5*H*-thianthren-5-ium tetrafluoroborate **2q** (42.4 mg, 0.10 mmol, 1.0 equiv) for 10 h afforded product after flash chromatography EA: PE = 0-20% as light yellow solid **6c** (21.6 mg, 81% yield).

**<sup>1</sup>H NMR** (400 MHz, CDCl<sub>3</sub>) δ 10.03 (s, 1H), 8.18 (s, 1H), 7.67 (dd, *J* = 8.7, 1.6 Hz, 1H), 7.24 (dd, *J* = 9.1, 4.5 Hz, 3H), 7.18 (d, *J* = 8.7 Hz, 1H), 7.07 – 7.01 (m, 2H), 6.77 (d, *J* = 4.5 Hz, 1H), 5.65 (s, 1H), 5.41 (s, 1H);

<sup>13</sup>C NMR (101 MHz, CDCl<sub>3</sub>) δ 192.4, 163.6 (d, *J* = 249.8 Hz), 143.6, 139.7, 132.6 (d, *J* = 3.3 Hz), 130.6, 130.2, 129.2, 128.7 (d, *J* = 8.4 Hz), 126.2, 122.7, 116.0 (d, *J* = 21.8 Hz), 112.3, 109.6 (d, *J* = 1.5 Hz), 105.1;

<sup>19</sup>F NMR (376 MHz, CDCl<sub>3</sub>) δ -111.24;

HRMS-ESI (*m/z*) [*M*+*H*]<sup>+</sup> calc'd for C<sub>17</sub>H<sub>13</sub>FN<sup>+</sup>, 266.0976, found 266.0975.

### 5-Bromo-1-(1-(4-fluorophenyl)vinyl)-1*H*-indole (6d)

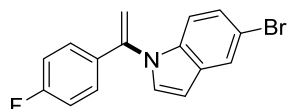

Following the Standard Procedure E, the reaction of 5-bromoindole **1y** (29.4 mg, 0.15 mmol, 1.5 equiv), K<sub>2</sub>CO<sub>3</sub> (13.8 mg, 0.10 mmol, 1.0 equiv) and (*E*)-5-(4-fluorostyryl)-5*H*-thianthren-5-ium tetrafluoroborate **2q** (42.4 mg, 0.10 mmol, 1.0 equiv) for 10 h afforded product after flash chromatography EA: PE = 0-10% as light yellow solid **6d** (24.0 mg, 76% yield).

<sup>1</sup>H NMR (400 MHz, CDCl<sub>3</sub>) δ 7.77 (d, *J* = 1.9 Hz, 1H), 7.26 – 7.22 (m, 2H), 7.19 – 7.15 (m, 2H), 7.07 – 6.99 (m, 2H), 6.93 (d, *J* = 8.8 Hz, 1H), 6.56 (d, *J* = 3.3 Hz, 1H), 5.54 (s, 1H), 5.33 (s, 1H);

<sup>13</sup>C NMR (101 MHz, CDCl<sub>3</sub>) δ 163.5 (d, *J* = 249.6 Hz), 143.9, 135.1, 132.9 (d, *J* = 3.3 Hz), 131.1, 129.8, 128.8 (d, *J* = 8.3 Hz), 125.1, 123.6, 115.9 (d, *J* = 21.9 Hz), 113.7, 113.4, 108.5 (d, *J* = 1.4 Hz), 102.9;

<sup>19</sup>F NMR (376 MHz, CDCl<sub>3</sub>) δ -111.58;

HRMS-ESI (*m/z*) [*M*+*H*]<sup>+</sup> calc'd for C<sub>16</sub>H<sub>12</sub>BrFN<sup>+</sup>, 316.0132, found 316.0129.

### 9-(1-(4-Fluorophenyl)vinyl)-9*H*-carbazole (6e)

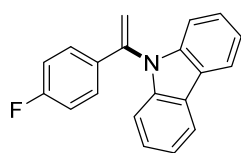

Following the Standard Procedure E, the reaction of carbazole **1z** (25.1 mg, 0.15 mmol, 1.5 equiv), K<sub>2</sub>CO<sub>3</sub> (13.8 mg, 0.10 mmol, 1.0 equiv) and (*E*)-5-(4-fluorostyryl)-5*H*-thianthren-5-ium tetrafluoroborate **2q** (42.4 mg, 0.10 mmol, 1.0 equiv) for 10 h afforded product after flash chromatography EA: PE = 0-10% as white solid **6e** (23.3 mg, 81% yield).

<sup>1</sup>H NMR (400 MHz, CDCl<sub>3</sub>) δ 8.14 (d, *J* = 7.7 Hz, 2H), 7.40 – 7.33 (m, 2H), 7.30 – 7.21 (m, 6H), 6.98 (t, *J* = 8.6 Hz, 2H), 6.02 (s, 1H), 5.58 (s, 1H);

<sup>13</sup>C NMR (101 MHz, CDCl<sub>3</sub>) δ 163.4 (d, *J* = 249.1 Hz), 141.9, 140.8, 132.6 (d, *J* = 3.3 Hz), 128.2 (d, *J* = 8.3 Hz), 126.0, 123.6, 120.4, 120.1, 115.9 (d, *J* = 21.8 Hz),

112.7 (d,  $J = 1.7$  Hz), 110.9;

$^{19}\text{F}$  NMR (376 MHz,  $\text{CDCl}_3$ )  $\delta$  -112.15;

HRMS-ESI ( $m/z$ ) [ $M+H$ ] $^+$  calc'd for  $\text{C}_{20}\text{H}_{15}\text{FN}^+$ , 288.1183, found 288.1177.

### 1-(1-(4-Fluorophenyl)vinyl)-1H-imidazole (6f)

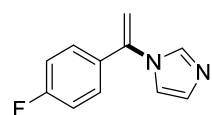

Following the Standard Procedure E, the reaction of imidazole **1aa** (10.2 mg, 0.15 mmol, 1.5 equiv),  $\text{K}_2\text{CO}_3$  (13.8 mg, 0.10 mmol, 1.0 equiv) and (*E*)-5-(4-fluorostyryl)-5*H*-thianthren-5-ium tetrafluoroborate **2q** (42.4 mg, 0.10 mmol, 1.0 equiv) for 10 h afforded product after flash chromatography EA: PE = 0-20% as colorless oil **6f** (15.8 mg, 84% yield).

$^1\text{H}$  NMR (400 MHz,  $\text{CDCl}_3$ )  $\delta$  7.63 (s, 1H), 7.36 – 7.28 (m, 2H), 7.14 (s, 1H), 7.12 – 7.04 (m, 2H), 7.00 (s, 1H), 5.28 (s, 1H), 5.27 (s, 1H);

$^{13}\text{C}$  NMR (101 MHz,  $\text{CDCl}_3$ )  $\delta$  163.7 (d,  $J = 250.3$  Hz), 142.4, 137.2, 131.9 (d,  $J = 3.4$  Hz), 129.9, 129.3 (d,  $J = 8.4$  Hz), 119.4, 116.0 (d,  $J = 22.0$  Hz), 106.5 (d,  $J = 1.3$  Hz);

$^{19}\text{F}$  NMR (376 MHz,  $\text{CDCl}_3$ )  $\delta$  -110.90;

HRMS-ESI ( $m/z$ ) [ $M+H$ ] $^+$  calc'd for  $\text{C}_{11}\text{H}_{10}\text{FN}_2^+$ , 189.0823, found 189.0821.

### *N*-(1-(4-Fluorophenyl)vinyl)-*N*,4-dimethylbenzenesulfonamide (6g)

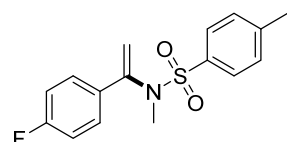

Following the Standard Procedure E, the reaction of *N*-methyl-*p*-toluenesulfonamide **1ab** (27.8 mg, 0.15 mmol, 1.5 equiv),  $\text{K}_2\text{CO}_3$  (13.8 mg, 0.10 mmol, 1.0 equiv) and (*E*)-5-(4-fluorostyryl)-5*H*-thianthren-5-ium tetrafluoroborate **2q** (42.4 mg, 0.10 mmol, 1.0 equiv) for 10 h afforded product after flash chromatography EA: PE = 0-20% as light yellow solid **6g** (19.4 mg, 64% yield).

$^1\text{H}$  NMR (400 MHz,  $\text{CDCl}_3$ )  $\delta$  7.74 – 7.67 (m, 2H), 7.51 – 7.44 (m, 2H), 7.35 – 7.30 (m, 2H), 7.05 – 6.98 (m, 2H), 5.35 (s, 1H), 4.77 (s, 1H), 3.04 (s, 3H), 2.45 (s, 3H);

$^{13}\text{C}$  NMR (101 MHz,  $\text{CDCl}_3$ )  $\delta$  163.3 (d,  $J = 248.3$  Hz), 147.5, 143.9, 134.5, 133.8 (d,  $J = 3.3$  Hz), 129.6, 128.4 (d,  $J = 8.3$  Hz), 128.1, 115.4 (d,  $J = 21.7$  Hz), 110.8, 38.5, 21.7;

$^{19}\text{F}$  NMR (376 MHz,  $\text{CDCl}_3$ )  $\delta$  -112.99;

HRMS-ESI ( $m/z$ ) [ $M+H$ ] $^+$  calc'd for  $\text{C}_{16}\text{H}_{17}\text{FNO}_2\text{S}^+$ , 306.0959, found 306.0957.

### 2-(1-(4-Fluorophenyl)vinyl)isoindoline-1,3-dione (6h)



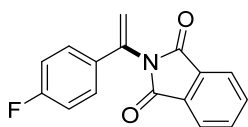

Following the Standard Procedure E, the reaction of phthalimide **1ac** (22.1 mg, 0.15 mmol, 1.5 equiv), K<sub>2</sub>CO<sub>3</sub> (13.8 mg, 0.10 mmol, 1.0 equiv) and (*E*)-5-(4-fluorostyryl)-5*H*-thianthren-5-

-ium tetrafluoroborate **2q** (42.4 mg, 0.10 mmol, 1.0 equiv) for 10 h afforded product after flash chromatography EA: PE = 0-20% as white solid **6h** (21.5 mg, 80% yield).

**<sup>1</sup>H NMR** (400 MHz, CDCl<sub>3</sub>) δ 7.93 (dd, *J* = 5.5, 3.1 Hz, 2H), 7.79 (dd, *J* = 5.5, 3.1 Hz, 2H), 7.36 (ddt, *J* = 8.1, 5.1, 2.5 Hz, 2H), 7.06 – 6.98 (m, 2H), 5.93 (s, 1H), 5.43 (s, 1H);

**<sup>13</sup>C NMR** (101 MHz, CDCl<sub>3</sub>) δ 167.2, 163.2 (d, *J* = 248.7 Hz), 136.4, 134.6, 131.9, 131.8 (d, *J* = 3.3 Hz), 127.5 (d, *J* = 8.4 Hz), 124.0, 116.1, 115.8 (d, *J* = 21.9 Hz);

**<sup>19</sup>F NMR** (376 MHz, CDCl<sub>3</sub>) δ -112.51;

**HRMS-ESI** (*m/z*) [M+H]<sup>+</sup> calc'd for C<sub>16</sub>H<sub>11</sub>FNO<sub>2</sub><sup>+</sup>, 268.0768, found 268.0768.

#### 5-Bromo-1-(1-(4-chlorophenyl)vinyl)-1*H*-indole (**6i**)

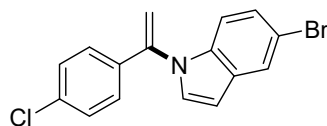

Following the Standard Procedure E, the reaction of 5-bromoindole **1y** (29.4 mg, 0.15 mmol, 1.5 equiv), K<sub>2</sub>CO<sub>3</sub> (13.8 mg, 0.10 mmol, 1.0 equiv) and

(*E*)-5-(4-chlorostyryl)-5*H*-thianthren-5-ium tetrafluoroborate **2p** (44.1 mg, 0.10 mmol, 1.0 equiv) for 10 h afforded product after flash chromatography EA: PE = 0-10% as light yellow solid **6i** (25.9 mg, 78% yield).

**<sup>1</sup>H NMR** (400 MHz, CDCl<sub>3</sub>) δ 7.78 (s, 1H), 7.32 (dd, *J* = 8.7, 1.8 Hz, 2H), 7.22 – 7.15 (m, 4H), 6.93 (d, *J* = 8.7 Hz, 1H), 6.57 (d, *J* = 3.3 Hz, 1H), 5.59 (s, 1H), 5.38 (s, 1H);

**<sup>13</sup>C NMR** (101 MHz, CDCl<sub>3</sub>) δ 143.8, 135.5, 135.2, 135.1, 131.1, 129.8, 129.1, 128.3, 125.2, 123.7, 113.8, 113.3, 109.2, 103.0;

**HRMS-ESI** (*m/z*) [M+H]<sup>+</sup> calc'd for C<sub>16</sub>H<sub>12</sub>BrClN<sup>+</sup>, 331.9836, found 331.9835.

#### 5-Bromo-1-(1-(4-bromophenyl)vinyl)-1*H*-indole (**6j**)

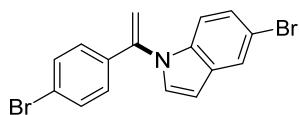

Following the Standard Procedure E, the reaction of 5-bromoindole **1y** (29.4 mg, 0.15 mmol, 1.5 equiv), K<sub>2</sub>CO<sub>3</sub> (13.8 mg, 0.10 mmol, 1.0 equiv) and (*E*)-5-(4-bromostyryl)-

-5*H*-thianthren-5-ium tetrafluoroborate **2o** (48.5 mg, 0.10 mmol, 1.0 equiv) for 10 h afforded product after flash chromatography EA: PE = 0-10% as light yellow solid **6j**

(31.0 mg, 82% yield).

**<sup>1</sup>H NMR** (400 MHz, CDCl<sub>3</sub>) δ 7.77 (t, *J* = 2.1 Hz, 1H), 7.53 – 7.43 (m, 2H), 7.25 – 7.10 (m, 4H), 6.93 (dd, *J* = 8.8, 2.1 Hz, 1H), 6.56 (t, *J* = 2.6 Hz, 1H), 5.60 (d, *J* = 1.9 Hz, 1H), 5.38 (d, *J* = 1.9 Hz, 1H);

**<sup>13</sup>C NMR** (101 MHz, CDCl<sub>3</sub>) δ 143.9, 135.6, 135.1, 132.1, 131.1, 129.8, 128.5, 125.2, 123.72, 123.67, 113.8, 113.3, 109.3, 103.1;

**HRMS-ESI** (*m/z*) [*M*+*H*]<sup>+</sup> calc'd for C<sub>16</sub>H<sub>12</sub>Br<sub>2</sub>N<sup>+</sup>, 375.9331, found 375.9329.

### 5-Bromo-1-(3,4-dihydronaphthalen-1-yl)-1*H*-indole (6k)

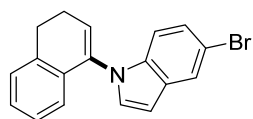

Following the Standard Procedure E, the reaction of 5-bromoindole **1y** (29.4 mg, 0.15 mmol, 1.5 equiv), K<sub>2</sub>CO<sub>3</sub> (13.8 mg, 0.10 mmol, 1.0 equiv) and 5-(3,4-dihydronaphthalen-2-yl)-5*H*-thianthren-5-ium tetrafluoroborate **2aa** (43.2 mg, 0.10 mmol, 1.0 equiv) for 10 h afforded product after flash chromatography EA: PE = 0-10% as light yellow solid **6k** (26.5 mg, 82% yield).

**<sup>1</sup>H NMR** (400 MHz, CDCl<sub>3</sub>) δ 7.79 (d, *J* = 1.9 Hz, 1H), 7.25 – 7.17 (m, 4H), 7.04 (dt, *J* = 7.8, 3.0 Hz, 2H), 6.58 (d, *J* = 3.0 Hz, 1H), 6.48 (d, *J* = 7.8 Hz, 1H), 6.19 (t, *J* = 4.6 Hz, 1H), 2.97 (t, *J* = 8.1 Hz, 2H), 2.57 (td, *J* = 8.1, 4.6 Hz, 2H);

**<sup>13</sup>C NMR** (101 MHz, CDCl<sub>3</sub>) δ 136.4, 136.3, 135.6, 131.9, 130.3, 130.0, 128.4, 127.9, 126.9, 125.7, 124.8, 123.4, 123.1, 113.3, 112.8, 102.1, 27.6, 22.9;

**HRMS-ESI** (*m/z*) [*M*+*H*]<sup>+</sup> calc'd for C<sub>18</sub>H<sub>15</sub>BrN<sup>+</sup>, 324.0382, found 324.0381.

### 1-(4-Phenylbut-1-en-2-yl)-1*H*-imidazole (6l)

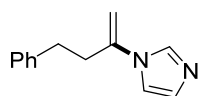

Following the Standard Procedure F, the reaction of imidazole **1aa** (10.2 mg, 0.15 mmol, 1.5 equiv), Cs<sub>2</sub>CO<sub>3</sub> (32.6 mg, 0.10 mmol, 1.0 equiv) and (*E*)-5-(4-phenylbut-1-en-1-yl)-5*H*-thianthren-5-ium tetrafluoroborate **2a** (43.4 mg, 0.10 mmol, 1.0 equiv) for 10 h afforded product after flash chromatography EA: PE = 0-20% as colorless oil **6l** (11.8 mg, 60% yield).

**<sup>1</sup>H NMR** (400 MHz, CDCl<sub>3</sub>) δ 7.70 (s, 1H), 7.32 – 7.27 (m, 2H), 7.24 – 7.19 (m, 1H), 7.16 – 7.09 (m, 4H), 5.07 (s, 1H), 4.78 (s, 1H), 2.80 (s, 4H);

**<sup>13</sup>C NMR** (101 MHz, CDCl<sub>3</sub>) δ 142.1, 140.2, 135.3, 130.1, 128.7, 128.4, 126.5, 117.2, 103.9, 35.9, 33.4;

**HRMS-ESI** (*m/z*) [*M*+*H*]<sup>+</sup> calc'd for C<sub>13</sub>H<sub>15</sub>N<sub>2</sub><sup>+</sup>, 199.1230, found 199.1228.

### 1-(1-Cyclohexylvinyl)-1*H*-imidazole (6m)

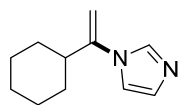

Following the Standard Procedure F, the reaction of imidazole **1aa** (10.2 mg, 0.15 mmol, 1.5 equiv), Cs<sub>2</sub>CO<sub>3</sub> (32.6 mg, 0.10 mmol, 1.0 equiv) and (*E*)-5-(5-(1,3-dioxoisindolin-2-yl)pent-1-en-1-yl)-5*H*-thianthren-5-ium tetrafluoroborate **2l** (41.2 mg, 0.10 mmol, 1.0 equiv) for 10 h afforded product after flash chromatography EA: PE = 0-20% as colorless oil **6m** (13.0 mg, 74% yield).

<sup>1</sup>H NMR (600 MHz, CDCl<sub>3</sub>) δ 7.61 (s, 1H), 7.08 (s, 1H), 7.04 (s, 1H), 5.05 (s, 1H), 4.85 (s, 1H), 2.32 (tt, *J* = 11.5, 3.2 Hz, 1H), 1.86 – 1.77 (m, 4H), 1.75 – 1.69 (m, 1H), 1.36 – 1.26 (m, 2H), 1.24 – 1.13 (m, 3H);

<sup>13</sup>C NMR (151 MHz, CDCl<sub>3</sub>) δ 148.8, 135.8, 129.6, 117.9, 103.8, 42.2, 31.5, 26.4, 26.2;

HRMS-ESI (*m/z*) [*M*+*H*]<sup>+</sup> calc'd for C<sub>11</sub>H<sub>17</sub>N<sub>2</sub><sup>+</sup>, 177.1386, found 177.1385.

### 1-(Octa-1,7-dien-2-yl)-1*H*-imidazole (6n)

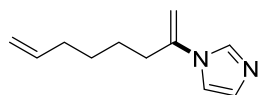

Following the Standard Procedure F, the reaction of imidazole **1aa** (10.2 mg, 0.15 mmol, 1.5 equiv), Cs<sub>2</sub>CO<sub>3</sub> (32.6 mg, 0.10 mmol, 1.0 equiv) and (*E*)-5-(5-(1,3-dioxoisindolin-2-yl)pent-1-en-1-yl)-5*H*-thianthren-5-ium tetrafluoroborate **2k** (41.2 mg, 0.10 mmol, 1.0 equiv) for 10 h afforded product after flash chromatography EA: PE = 0-20% as colorless oil **6n** (11.5 mg, 65% yield).

<sup>1</sup>H NMR (600 MHz, CDCl<sub>3</sub>) δ 7.68 (s, 1H), 7.10 (s, 1H), 7.09 (s, 1H), 5.77 (ddt, *J* = 16.9, 10.2, 6.7 Hz, 1H), 5.07 (s, 1H), 4.99 (dd, *J* = 16.9, 1.8 Hz, 1H), 4.95 (dd, *J* = 10.2, 1.8 Hz, 1H), 4.80 (s, 1H), 2.50 (t, *J* = 7.4 Hz, 2H), 2.06 (dt, *J* = 7.2, 6.7 Hz, 2H), 1.51 (tt, *J* = 7.4, 7.0 Hz, 2H), 1.44 (tt, *J* = 7.2, 7.0 Hz, 2H);

<sup>13</sup>C NMR (151 MHz, CDCl<sub>3</sub>) δ 142.9, 138.4, 135.3, 129.9, 117.2, 115.0, 103.1, 33.9, 33.4, 28.3, 26.4;

HRMS-ESI (*m/z*) [*M*+*H*]<sup>+</sup> calc'd for C<sub>11</sub>H<sub>17</sub>N<sub>2</sub><sup>+</sup>, 177.1386, found 177.1385.

### 1-(Cyclohex-1-en-1-yl)-1*H*-imidazole (6o)

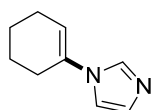

Following the Standard Procedure F, the reaction of imidazole **1aa** (10.2 mg, 0.15 mmol, 1.5 equiv), Cs<sub>2</sub>CO<sub>3</sub> (32.6 mg, 0.10 mmol, 1.0 equiv) and (*E*)-5-(5-(1,3-dioxoisindolin-2-yl)pent-1-en-1-yl)-5*H*-thianthren-5-ium tetrafluoroborate **2u** (42.4 mg, 0.10 mmol, 1.0 equiv) for 10 h

afforded product after flash chromatography EA: PE = 0-20% as colorless oil **6o** (8.5 mg, 57% yield).

**<sup>1</sup>H NMR** (400 MHz, CDCl<sub>3</sub>) δ 7.65 (s, 1H), 7.08 (s, 1H), 7.06 (s, 1H), 5.83 (tt, *J* = 3.9, 1.6 Hz, 1H), 2.46 – 2.39 (m, 2H), 2.23 – 2.15 (m, 2H), 1.87 – 1.78 (m, 2H), 1.71 – 1.62 (m, 2H);

**<sup>13</sup>C NMR** (101 MHz, CDCl<sub>3</sub>) δ 134.6, 133.9, 129.5, 116.7, 116.5, 27.5, 24.2, 22.5, 21.8;

**HRMS-ESI** (*m/z*) [*M*+*H*]<sup>+</sup> calc'd for C<sub>9</sub>H<sub>13</sub>N<sub>2</sub><sup>+</sup>, 149.1073, found 149.1073.

### 1-((1*E*,5*Z*)-Cycloocta-1,5-dien-1-yl)-1*H*-imidazole (**6p**)

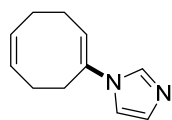

Following the Standard Procedure F, the reaction of imidazole **1aa** (10.2 mg, 0.15 mmol, 1.5 equiv), Cs<sub>2</sub>CO<sub>3</sub> (32.6 mg, 0.10 mmol, 1.0 equiv) and (*E*)-5-(5-(1,3-dioxoisindolin-2-yl)pent-1-en-1-yl)-5*H*-thianthren-5-ium tetrafluoro-borate **2w** (42.4 mg, 0.10 mmol, 1.0 equiv) for 10 h afforded product after flash chromatography EA: PE = 0-20% as colorless oil **6p** (9.9 mg, 57% yield).

**<sup>1</sup>H NMR** (400 MHz, CDCl<sub>3</sub>) δ 7.56 (s, 1H), 7.04 (s, 1H), 7.00 (s, 1H), 5.74 (t, *J* = 6.7 Hz, 1H), 5.61 (t, *J* = 4.1 Hz, 2H), 2.81 – 2.73 (m, 2H), 2.53 – 2.41 (m, 6H);

**<sup>13</sup>C NMR** (101 MHz, CDCl<sub>3</sub>) δ 136.1, 136.0, 129.3, 128.9, 127.8, 121.8, 118.1, 32.1, 27.7, 26.6, 25.7;

**HRMS-ESI** (*m/z*) [*M*+*H*]<sup>+</sup> calc'd for C<sub>11</sub>H<sub>15</sub>N<sub>2</sub><sup>+</sup>, 175.1230, found 175.1229.

### 5-((3,5-Dimethylphenoxy)methyl)-3-(1-(4-fluorophenyl)vinyl)oxazolidin-2-one (**6q**)

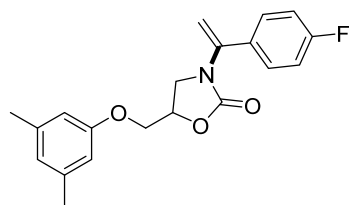

Following the Standard Procedure E, the reaction of Metaxalone (33.2 mg, 0.15 mmol, 1.5 equiv), K<sub>2</sub>CO<sub>3</sub> (13.8 mg, 0.10 mmol, 1.0 equiv) and (*E*)-5-(4-fluorostyryl)-5*H*-thianthren-5-ium tetrafluoro-borate **2q** (42.4 mg, 0.10 mmol, 1.0 equiv) for 10 h afforded product after flash chromatography EA: PE = 0-50% as white solid **6q** (27.9 mg, 82% yield).

**<sup>1</sup>H NMR** (600 MHz, CDCl<sub>3</sub>) δ 7.44 – 7.39 (m, 2H), 7.09 – 7.01 (m, 2H), 6.67 (s, 1H), 6.56 (s, 2H), 5.23 (d, *J* = 0.6 Hz, 1H), 5.20 (d, *J* = 0.6 Hz, 1H), 4.90 (ddt, *J* = 9.0, 5.5, 4.7 Hz, 1H), 4.20 (dd, *J* = 10.2, 4.7 Hz, 1H), 4.14 (dd, *J* = 10.2, 4.7 Hz, 1H), 3.92 (dd,

$J = 9.1, 9.0$  Hz, 1H), 3.79 (dd,  $J = 9.1, 5.5$  Hz, 1H), 2.30 (s, 6H);

$^{13}\text{C}$  NMR (151 MHz,  $\text{CDCl}_3$ )  $\delta$  163.2 (d,  $J = 248.4$  Hz), 158.2, 155.2, 142.2, 139.7, 132.0 (d,  $J = 3.2$  Hz), 128.7 (d,  $J = 8.3$  Hz), 123.7, 115.6 (d,  $J = 21.8$  Hz), 112.5, 106.9, 70.9, 68.1, 48.5, 21.6;

$^{19}\text{F}$  NMR (376 MHz,  $\text{CDCl}_3$ )  $\delta$  -112.62.

HRMS-ESI ( $m/z$ )  $[\text{M}+\text{H}]^+$  calc'd for  $\text{C}_{20}\text{H}_{21}\text{FNO}_3^+$ , 342.1500, found 342.1498.

**1-(1-(4-Fluorophenyl)vinyl)-2-(((3-methyl-4-(2,2,2-trifluoroethoxy)pyridin-2-yl)-methyl)sulfinyl)-1H-benzo[d]imidazole (6r)**

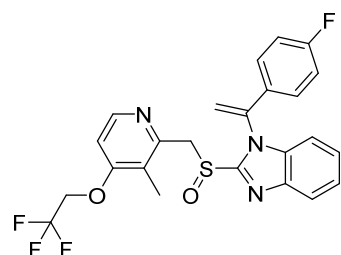

Following the Standard Procedure E, the reaction of Lansoprazole (55.4 mg, 0.15 mmol, 1.5 equiv),  $\text{K}_2\text{CO}_3$  (13.8 mg, 0.10 mmol, 1.0 equiv) and (*E*)-5-(4-fluorostyryl)-5*H*-thianthren-5-ium tetrafluoroborate **2q** (42.4 mg, 0.10 mmol, 1.0 equiv) for 10 h afforded product after flash chromatography EA: PE = 0-50% as white solid **6r** (34.3 mg, 70% yield).

$^1\text{H}$  NMR (400 MHz,  $\text{CDCl}_3$ )  $\delta$  8.12 (d,  $J = 5.6$  Hz, 1H), 7.88 (d,  $J = 8.1$  Hz, 1H), 7.38 – 7.31 (m, 1H), 7.30 – 7.26 (m, 1H), 7.26 – 7.19 (m, 2H), 7.07 (d,  $J = 8.1$  Hz, 1H), 7.03 – 6.97 (m, 1H), 6.57 (d,  $J = 5.7$  Hz, 1H), 6.11 – 6.00 (m, 1H), 5.70 (s, 1H), 5.20 (d,  $J = 14.0$  Hz, 1H), 4.95 (d,  $J = 14.0$  Hz, 1H), 4.35 (q,  $J = 7.8$  Hz, 2H), 2.33 (s, 3H);

$^{13}\text{C}$  NMR (101 MHz,  $\text{CDCl}_3$ )  $\delta$  163.7 (d,  $J = 250.5$  Hz), 161.8, 154.2, 152.1, 148.0, 142.2, 139.5, 136.0, 131.3 (d,  $J = 3.3$  Hz), 128.2 (d,  $J = 8.5$  Hz), 125.4, 124.0, 123.1, 123.0 (q,  $J = 277.9$  Hz), 121.5, 116.1 (d,  $J = 22.0$  Hz), 115.6, 111.9, 105.7, 65.5 (q,  $J = 36.4$  Hz), 57.8, 11.1;

$^{19}\text{F}$  NMR (376 MHz,  $\text{CDCl}_3$ )  $\delta$  -73.79, -110.75;

HRMS-ESI ( $m/z$ )  $[\text{M}+\text{H}]^+$  calc'd for  $\text{C}_{24}\text{H}_{20}\text{F}_4\text{N}_3\text{O}_2\text{S}^+$ , 490.1207, found 490.1206.

***N*-(2-(1-(1-(4-Fluorophenyl)vinyl)-5-methoxy-1*H*-indol-3-yl)ethyl)acetamide (6s)**

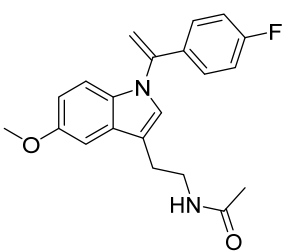

Following the Standard Procedure E, the reaction of Melatonin (34.8 mg, 0.15 mmol, 1.5 equiv),  $\text{K}_2\text{CO}_3$  (13.8 mg, 0.10 mmol, 1.0 equiv) and (*E*)-5-(4-fluorostyryl)-5*H*-thianthren-5-ium tetrafluoroborate **2q** (42.4 mg, 0.10 mmol, 1.0 equiv) for 10 h afforded product after flash chromatography EA: PE = 0-50%

as white solid **6s** (26.4 mg, 75% yield).

**<sup>1</sup>H NMR** (400 MHz, CDCl<sub>3</sub>) δ 7.28 – 7.20 (m, 2H), 7.04 – 6.97 (m, 3H), 6.95 – 6.91 (m, 2H), 6.73 (dd, *J* = 9.0, 2.4 Hz, 1H), 5.64 (bs, 1H), 5.36 (s, 1H), 5.22 (s, 1H), 3.82 (s, 3H), 3.55 (dt, *J* = 6.9, 6.2 Hz, 2H), 2.90 (t, *J* = 6.9 Hz, 2H), 1.91 (s, 3H);

**<sup>13</sup>C NMR** (101 MHz, CDCl<sub>3</sub>) δ 170.1, 163.4 (d, *J* = 249.2 Hz), 154.5, 144.1, 133.4 (d, *J* = 3.2 Hz), 132.0, 129.5, 129.1 (d, *J* = 8.3 Hz), 126.9, 115.7 (d, *J* = 21.8 Hz), 113.6, 113.0, 112.4, 106.7, 100.9, 56.0, 39.8, 25.4, 23.5;

**<sup>19</sup>F NMR** (376 MHz, CDCl<sub>3</sub>) δ -111.90;

**HRMS-ESI** (*m/z*) [*M*+*H*]<sup>+</sup> calc'd for C<sub>21</sub>H<sub>22</sub>FN<sub>2</sub>O<sub>2</sub><sup>+</sup>, 353.1660, found 353.1656.

## VII. Mechanistic Study

### One-Pot Experiments

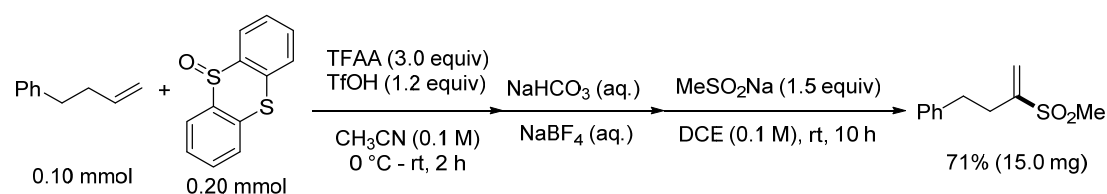

Under the nitrogen atmosphere, to a 10.0 mL borosilicate vial equipped with a magnetic stir bar was charged with thianthrene 5-oxide (46.5 mg, 0.2 mmol, 2.0 equiv), 4-phenyl-1-butene (13.2 mg, 0.1 mmol, 1.0 equiv) and CH<sub>3</sub>CN (1.0 mL). Then, trifluoroacetic anhydride (31.5 mg, 0.30 mmol, 3.0 equiv) and trifluoromethanesulfonic (18.0 mg, 0.12 mmol, 1.2 equiv) were added at 0 °C. The resulting mixture was stirred at 0 °C for 1 h. After stirring at room temperature for 1 h, the solvent was evaporated followed by the addition of DCM (10.0 mL), washed with saturated aqueous NaHCO<sub>3</sub> solution (2 x 10.0 mL), then the CH<sub>2</sub>Cl<sub>2</sub> solution was washed with aqueous NaBF<sub>4</sub> solution (2 x 10.0 mL, 5 % w/w). The DCM solvent was evaporated followed by the addition of sodium methanesulfinate **1a** (15.6 mg, 0.15 mmol, 1.5 equiv) and DCE (1.0 mL). The resulting mixture was stirred at room temperature for 10 h. Evaporation of solvent and flash chromatography (EA: PE = 0-10%) afforded **3a** as white solid (15.0 mg, 71% yield).

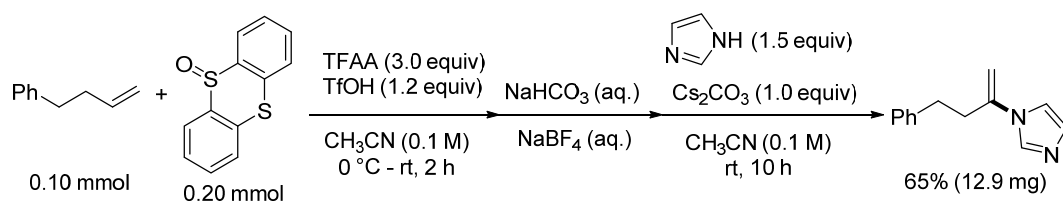

Under the nitrogen atmosphere, to a 10.0 mL borosilicate vial equipped with a magnetic stir bar was charged with thianthrene 5-oxide (46.5 mg, 0.2 mmol, 2.0 equiv), 4-phenyl- 1-butene (13.2 mg, 0.1 mmol, 1.0 equiv) and CH<sub>3</sub>CN (1.0 mL). Then, trifluoroacetic anhydride (31.5 mg, 0.30 mmol, 3.0 equiv) and trifluoromethanesulfonic (18.0 mg, 0.12 mmol, 1.2 equiv) were added at 0 °C. The resulting mixture was stirred at 0 °C for 1 h. After stirring at room temperature for 1 h, the solvent was evaporated followed by the addition of DCM (10.0 mL), washed with saturated aqueous NaHCO<sub>3</sub> solution (2 x 10.0 mL), then the CH<sub>2</sub>Cl<sub>2</sub> solution was washed with aqueous NaBF<sub>4</sub> solution (2 x 10.0 mL, 5 % w/w). The DCM solvent was evaporated followed by the addition of imidazole **1aa** (10.2 mg, 0.15 mmol, 1.5 equiv), K<sub>2</sub>CO<sub>3</sub> (13.8 mg, 0.10 mmol, 1.0 equiv) and CH<sub>3</sub>CN (1.0 mL). The resulting mixture was stirred at room temperature for 10 h. Evaporation of solvent and flash chromatography (EA: PE = 0-20%) afforded **6l** as colorless oil (12.9 mg, 65% yield).

### Probe of Radical Experiments

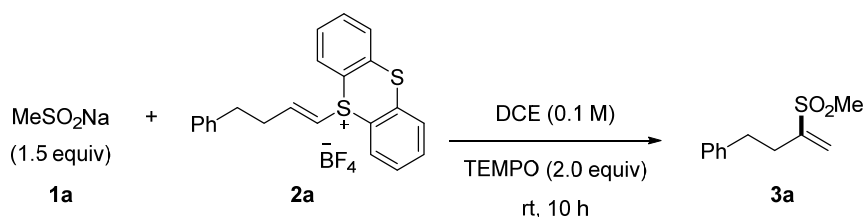

Following the Standard Procedure A, the reaction of sodium methanesulfinate **1a** (15.6 mg, 0.15 mmol, 1.5 equiv), (*E*)-5-(4-phenylbut-1-en-1-yl)-5*H*-thianthren-5-ium tetrafluoroborate **2a** (43.4 mg, 0.10 mmol, 1.0 equiv) and TEMPO (30.5 mg, 0.20 mmol, 2.0 equiv) in DCE (1.0 mL) for 10 h. The conversion of **2a** >95%, and the yield of **3a** 72% yield. Conversion and yield were determined by <sup>1</sup>H NMR of the crude mixture using mesitylene (12.0 mg, 0.10 mmol, 1.0 equiv) as internal standard.

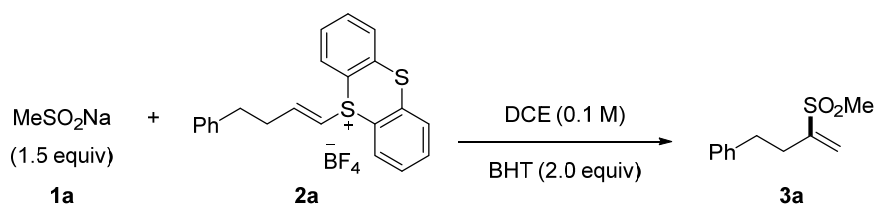

Following the Standard Procedure A, the reaction of sodium methanesulfinate **1a** (15.6 mg, 0.15 mmol, 1.5 equiv), (*E*)-5-(4-phenylbut-1-en-1-yl)-5*H*-thianthren-5-ium tetrafluoroborate **2a** (43.4 mg, 0.10 mmol, 1.0 equiv) and BHT (44.1 mg, 0.20 mmol, 2.0 equiv) in DCE (1.0 mL) for 10 h. The conversion of **2a** >95%, and the yield of **3a** 83% yield. Conversion and yield were determined by <sup>1</sup>H NMR of the crude mixture using mesitylene (12.0 mg, 0.10 mmol, 1.0 equiv) as internal standard.

### Assignment of Reaction Intermediate

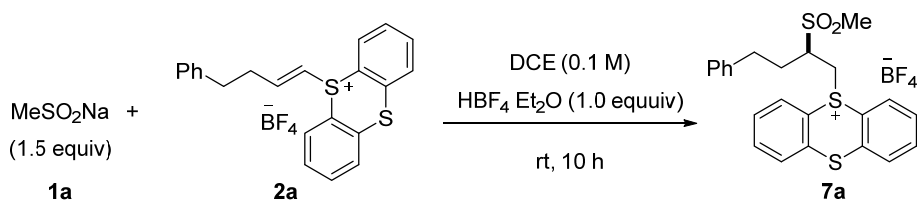

Under the nitrogen atmosphere, to a 10.0 mL Schlenk tube equipped with a magnetic stir bar was charged with (*E*)-5-(4-phenylbut-1-en-1-yl)-5*H*-thianthren-5-ium tetrafluoroborate **2a** (43.4 mg, 0.1 mmol, 1.0 equiv), sodium methanesulfinate **1a** (15.6 mg, 0.15 mmol, 1.5 equiv) and HBF<sub>4</sub>·Et<sub>2</sub>O (16.2 mg, 0.1 mmol, 1.0 equiv). After addition of DCE (1.0 mL), the reaction stirred at room temperature for 10 h. The reaction mixture was evaporated and washed with Et<sub>2</sub>O (3 x 10.0 mL). The residual solid was dissolved in DCM (10.0 mL) and filtrated, the filtrate was evaporated to afford **7a** (22.1 mg, 43% yield).

<sup>1</sup>H NMR (400 MHz, CDCl<sub>3</sub>) δ 8.33 (d, *J* = 7.8 Hz, 1H), 8.09 – 7.99 (m, 1H), 7.83 (dd, *J* = 7.9, 1.0 Hz, 1H), 7.77 – 7.69 (m, 3H), 7.69 – 7.56 (m, 2H), 7.25 – 7.15 (m, 3H), 7.08 – 7.03 (m, 2H), 4.31 (dd, *J* = 13.8, 9.6 Hz, 1H), 4.11 (dd, *J* = 13.8, 4.4 Hz, 1H), 3.25 – 3.16 (m, 1H), 3.12 (s, 3H), 2.81 (dt, *J* = 14.3, 7.2 Hz, 1H), 2.71 (dt, *J* = 14.3, 7.2 Hz, 1H), 2.44 – 2.33 (m, 1H), 2.03 (dq, *J* = 15.2, 7.2 Hz, 1H);

<sup>13</sup>C NMR (101 MHz, CDCl<sub>3</sub>) δ 138.9, 136.1, 135.9, 135.8, 135.2, 134.7, 130.6, 130.1, 129.0, 128.6, 126.8, 118.8, 117.3, 58.3, 40.4, 38.0, 32.0, 29.8;

<sup>19</sup>F NMR (376 MHz, CDCl<sub>3</sub>) δ -150.36, 150.41;



**HRMS-ESI** (m/z) [M-BF<sub>4</sub>]<sup>+</sup> calc'd for C<sub>23</sub>H<sub>23</sub>O<sub>2</sub>S<sub>3</sub><sup>+</sup>, 427.0855, found 427.0853.

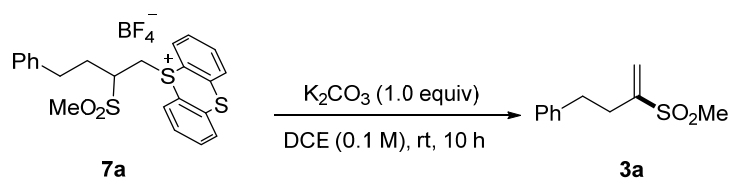

Under the nitrogen atmosphere, to a 10.0 mL Schlenk tube equipped with a magnetic stir bar was charged with 5-(2-(methanesulfonyl)-4-phenylbutyl)-5*H*-thianthren-5-ium trifluoromethanesulfonate **7a** (57.7 mg, 0.1 mmol, 1.0 equiv) and K<sub>2</sub>CO<sub>3</sub> (13.8 mg, 0.1 mmol, 1.0 equiv). After addition of DCE (1.0 mL), the reaction stirred at room temperature for 10 h. The reaction mixture was purified directly by column chromatography to afford **3a** as white solid (13.3 mg, 63% yield).

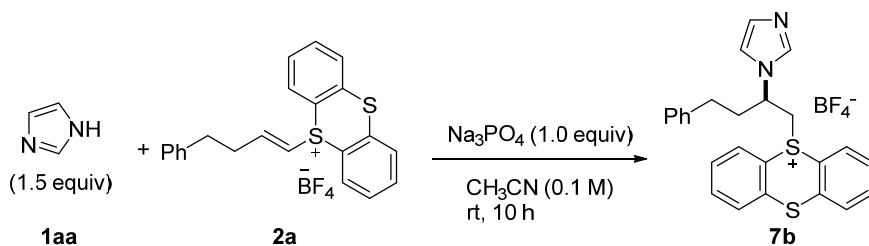

Under the nitrogen atmosphere, to a 10.0 mL Schlenk tube equipped with a magnetic stir bar was charged with (*E*)-5-(4-phenylbut-1-en-1-yl)-5*H*-thianthren-5-ium tetrafluoroborate **2a** (86.8 mg, 0.2 mmol, 1.0 equiv), imidazole **1aa** (20.4 mg, 0.3 mmol, 1.5 equiv) and Na<sub>3</sub>PO<sub>4</sub> (32.8 mg, 0.2 mmol, 1.0 equiv). After addition of CH<sub>3</sub>CN (2.0 mL), the reaction stirred at room temperature for 10 h. The reaction mixture was evaporated and washed with Et<sub>2</sub>O (3 x 10.0 mL). The residual solid was dissolved in DCM (10.0 mL) and filtrated, the filtrate was evaporated to afford **7b** (98.3 mg, 98% yield).

**<sup>1</sup>H NMR** (600 MHz, CDCl<sub>3</sub>) δ 8.31 (d, *J* = 7.9 Hz, 1H), 7.80 (d, *J* = 7.8 Hz, 1H), 7.74 – 7.66 (m, 2H), 7.61 (dt, *J* = 10.8, 7.8 Hz, 2H), 7.51 (d, *J* = 7.9 Hz, 1H), 7.47 (s, 1H), 7.39 (t, *J* = 7.7 Hz, 1H), 7.16 (t, *J* = 7.5 Hz, 2H), 7.10 (t, *J* = 7.7 Hz, 1H), 6.98 (d, *J* = 7.5 Hz, 2H), 6.83 (s, 1H), 6.77 (s, 1H), 5.07 (tt, *J* = 6.7, 3.2 Hz, 1H), 4.68 (dd, *J* = 13.2, 3.2 Hz, 1H), 3.87 (dd, *J* = 13.2, 3.2 Hz, 1H), 2.48 – 2.41 (m, 1H), 2.25 – 2.16 (m, 2H), 1.95 (tt, *J* = 14.0, 6.7 Hz, 1H);

**<sup>13</sup>C NMR** (101 MHz, CDCl<sub>3</sub>) δ 139.6, 136.8, 136.1, 135.9, 134.6, 134.3, 133.3, 131.5, 130.41, 130.38, 130.36, 130.2, 128.6, 128.4, 126.4, 118.7, 117.1, 115.7, 54.2, 46.4,

37.1, 31.5;

$^{19}\text{F}$  NMR (376 MHz,  $\text{CDCl}_3$ )  $\delta$  -150.49, 150.55;

HRMS-ESI ( $m/z$ )  $[\text{M}-\text{BF}_4]^+$  calc'd for  $\text{C}_{25}\text{H}_{23}\text{N}_2\text{S}_2^+$ , 415.1297, found 415.1290.

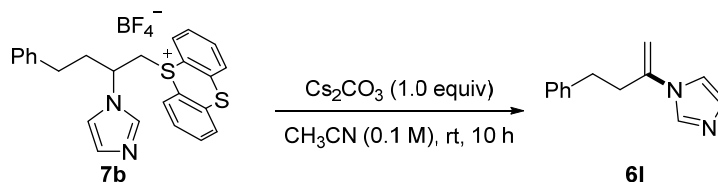

Under the nitrogen atmosphere, to a 10.0 mL Schlenk tube equipped with a magnetic stir bar was charged with 5-(2-(1*H*-imidazol-1-yl)-4-phenylbutyl)-5*H*-thianthren-5-ium tetrafluoroborate **7b** (50.2 mg, 0.1 mmol, 1.0 equiv) and  $\text{Cs}_2\text{CO}_3$  (32.6 mg, 0.1 mmol, 1.0 equiv). After addition of  $\text{CH}_3\text{CN}$  (1.0 mL), the reaction stirred at room temperature for 10 h. The reaction mixture was purified directly by column chromatography to afford **6l** as colorless oil (11.3 mg, 57% yield).

## VIII. Crystallographic Data

### X-Ray Crystallographic Data for **4j** (CCDC 2241239)

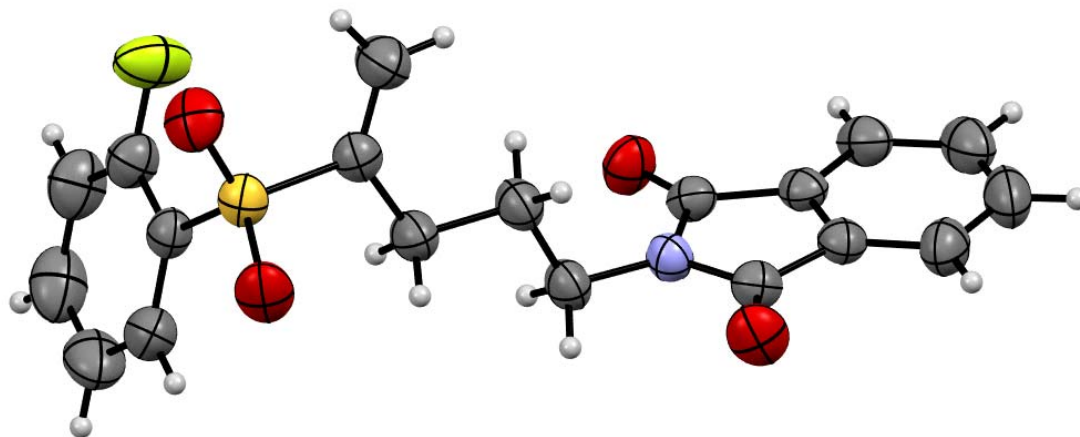

**Table S8.** Crystal data and structure refinement for **4j** (LMS12209B2\_0m)

|                     |                                                  |
|---------------------|--------------------------------------------------|
| Identification code | LMS12209B2_0m                                    |
| Empirical formula   | $\text{C}_{19}\text{H}_{16}\text{FNO}_4\text{S}$ |
| Formula weight      | 373.39                                           |
| Temperature/K       | 267.0                                            |

|                                                |                                                                |
|------------------------------------------------|----------------------------------------------------------------|
| Crystal system                                 | monoclinic                                                     |
| Space group                                    | P2/n                                                           |
| a/Å                                            | 7.0846(7)                                                      |
| b/Å                                            | 12.2015(12)                                                    |
| c/Å                                            | 23.936(2)                                                      |
| $\alpha/^\circ$                                | 90                                                             |
| $\beta/^\circ$                                 | 98.375(4)                                                      |
| $\gamma/^\circ$                                | 90                                                             |
| Volume/Å <sup>3</sup>                          | 2047.1(3)                                                      |
| Z                                              | 4                                                              |
| $\rho_{\text{calc}}/\text{g}/\text{cm}^3$      | 1.212                                                          |
| $\mu/\text{mm}^{-1}$                           | 1.676                                                          |
| F(000)                                         | 776.0                                                          |
| Crystal size/mm <sup>3</sup>                   | 0.02 × 0.01 × 0.01                                             |
| Radiation                                      | CuK $\alpha$ ( $\lambda$ = 1.54178)                            |
| 2 $\Theta$ range for data collection/ $^\circ$ | 7.244 to 144.838                                               |
| Index ranges                                   | -8 ≤ h ≤ 8, -14 ≤ k ≤ 15, -29 ≤ l ≤ 22                         |
| Reflections collected                          | 20764                                                          |
| Independent reflections                        | 4021 [ $R_{\text{int}}$ = 0.0498, $R_{\text{sigma}}$ = 0.0344] |
| Data/restraints/parameters                     | 4021/0/235                                                     |
| Goodness-of-fit on F <sup>2</sup>              | 1.198                                                          |
| Final R indexes [ $I \geq 2\sigma(I)$ ]        | $R_1$ = 0.0588, $wR_2$ = 0.2023                                |
| Final R indexes [all data]                     | $R_1$ = 0.0629, $wR_2$ = 0.2059                                |
| Largest diff. peak/hole / e Å <sup>-3</sup>    | 0.38/-0.28                                                     |

**X-Ray Crystallographic Data for 6g (CCDC 2241240)**

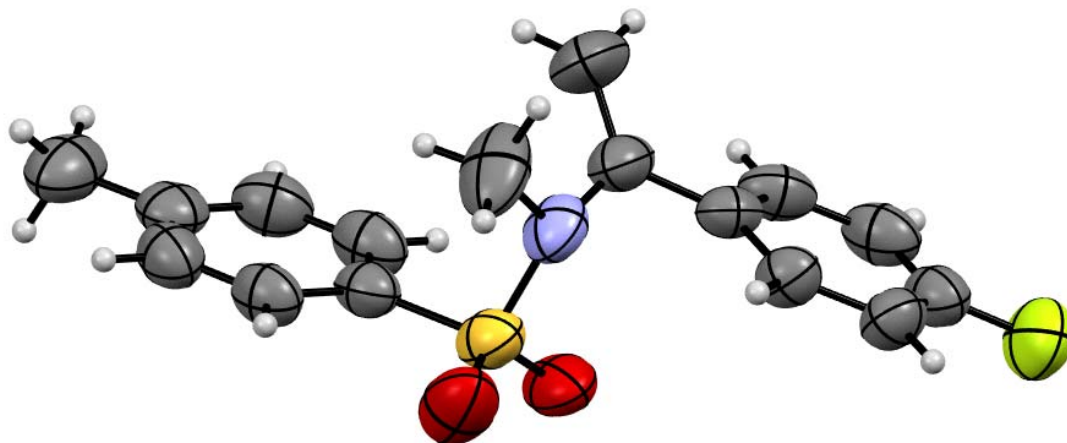

**Table S9.** Crystal data and structure refinement for **6g** (lms129c06\_0ma)

|                                        |                                                    |
|----------------------------------------|----------------------------------------------------|
| Identification code                    | lms129c06_0ma                                      |
| Empirical formula                      | C <sub>16</sub> H <sub>16</sub> FNO <sub>2</sub> S |
| Formula weight                         | 305.36                                             |
| Temperature/K                          | 298.0                                              |
| Crystal system                         | monoclinic                                         |
| Space group                            | Cc                                                 |
| a/Å                                    | 17.2716(14)                                        |
| b/Å                                    | 11.7864(14)                                        |
| c/Å                                    | 7.4972(7)                                          |
| $\alpha$ /°                            | 90                                                 |
| $\beta$ /°                             | 92.385(6)                                          |
| $\gamma$ /°                            | 90                                                 |
| Volume/Å <sup>3</sup>                  | 1524.9(3)                                          |
| Z                                      | 4                                                  |
| $\rho_{\text{calc}}/\text{cm}^3$       | 1.330                                              |
| $\mu/\text{mm}^{-1}$                   | 2.019                                              |
| F(000)                                 | 640.0                                              |
| Crystal size/mm <sup>3</sup>           | 0.02 × 0.01 × 0.01                                 |
| Radiation                              | CuK $\alpha$ ( $\lambda$ = 1.54178)                |
| 2 $\theta$ range for data collection/° | 9.086 to 144.248                                   |

|                                                |                                                               |
|------------------------------------------------|---------------------------------------------------------------|
| Index ranges                                   | $-21 \leq h \leq 21, -14 \leq k \leq 14, -9 \leq l \leq 8$    |
| Reflections collected                          | 12375                                                         |
| Independent reflections                        | 2802 [ $R_{\text{int}} = 0.0543, R_{\text{sigma}} = 0.0408$ ] |
| Data/restraints/parameters                     | 2802/2/192                                                    |
| Goodness-of-fit on $F^2$                       | 1.055                                                         |
| Final R indexes [ $I \geq 2\sigma(I)$ ]        | $R_1 = 0.0349, wR_2 = 0.0890$                                 |
| Final R indexes [all data]                     | $R_1 = 0.0375, wR_2 = 0.0913$                                 |
| Largest diff. peak/hole / $e \text{ \AA}^{-3}$ | 0.20/-0.13                                                    |
| Flack parameter                                | 0.116(9)                                                      |

## IX. References

1. Meyer, A. U.; Jäger, S.; Prasad Hari, D. & König, B. Visible Light-Mediated Metal-Free Synthesis of Vinyl Sulfones from Aryl Sulfinates. *Adv. Syn. Catal.* **357**, 2050-2054 (2015).
2. Shi, S.-H. et al. Electro-Oxidation Induced O-S Cross-Coupling of Quinoxalinones with Sodium Sulfinates for Synthesizing 2-Sulfonyloxylated Quinoxalines. *Chem. Commun.* **58**, 12357-12360 (2022).
3. Gao, Y. et al. Development of on-DNA Vinyl Sulfone Synthesis for DNA-Encoded Chemical Libraries. *Org. Chem. Front.* **9**, 4542-4548 (2022).
4. Chen, J.; Li, J.; Plutschack, M. B.; Berger, F. & Ritter, T. Regio- and Stereoselective Thianthrenation of Olefins To Access Versatile Alkenyl Electrophiles. *Angew. Chem. Int. Ed.* **59**, 5616-5620 (2020).
5. Liu, M.-S.; Du, H.-W.; Cui, J.-F. & Shu, W. Intermolecular Metal-Free Cyclopropanation and Aziridination of Alkenes with  $\text{XH}_2$  ( $\text{X}=\text{N}, \text{C}$ ) by Thianthrenation. *Angew. Chem. Int. Ed.* **61**, e202209929 (2022).
6. Liu, M.-S.; Du, H.-W. & Shu, W. Metal-Free Allylic C-H Nitrogenation, Oxygenation, and Carbonation of Alkenes by Thianthrenation. *Chem. Sci.* **13**, 1003-1008 (2022).
7. Juliá, F.; Yan, J.; Paulus, F. & Ritter, T. Vinyl Thianthrenium Tetrafluoroborate: A Practical and Versatile Vinylating Reagent Made from Ethylene. *J. Am. Chem. Soc.* **143**, 12992-12998 (2021).

8. Xie, R.; Zhu, J. & Huang, Y. Cu-Catalyzed Highly Selective Silylation and Borylation of Alkenylsulfonium Salts. *Org. Chem. Front.* **8**, 5699-5704 (2021).

## X. Copies of $^1\text{H}$ , $^{13}\text{C}$ and $^{19}\text{F}$ NMR Spectra

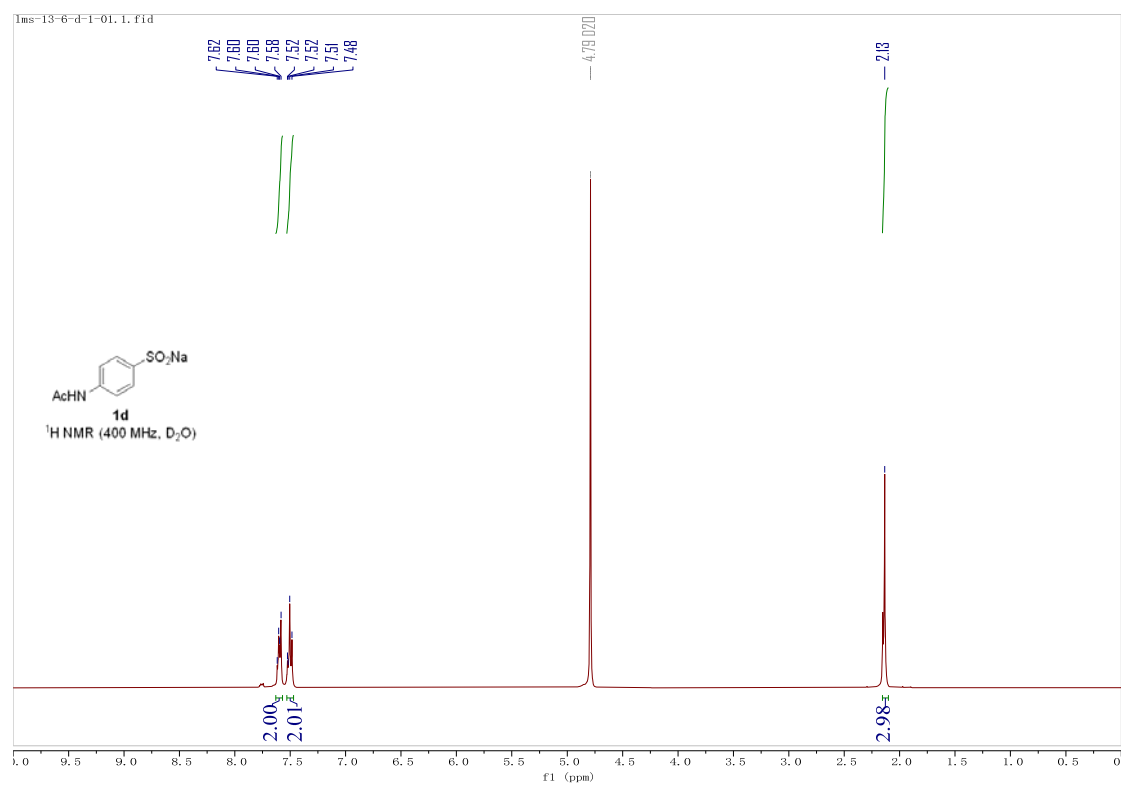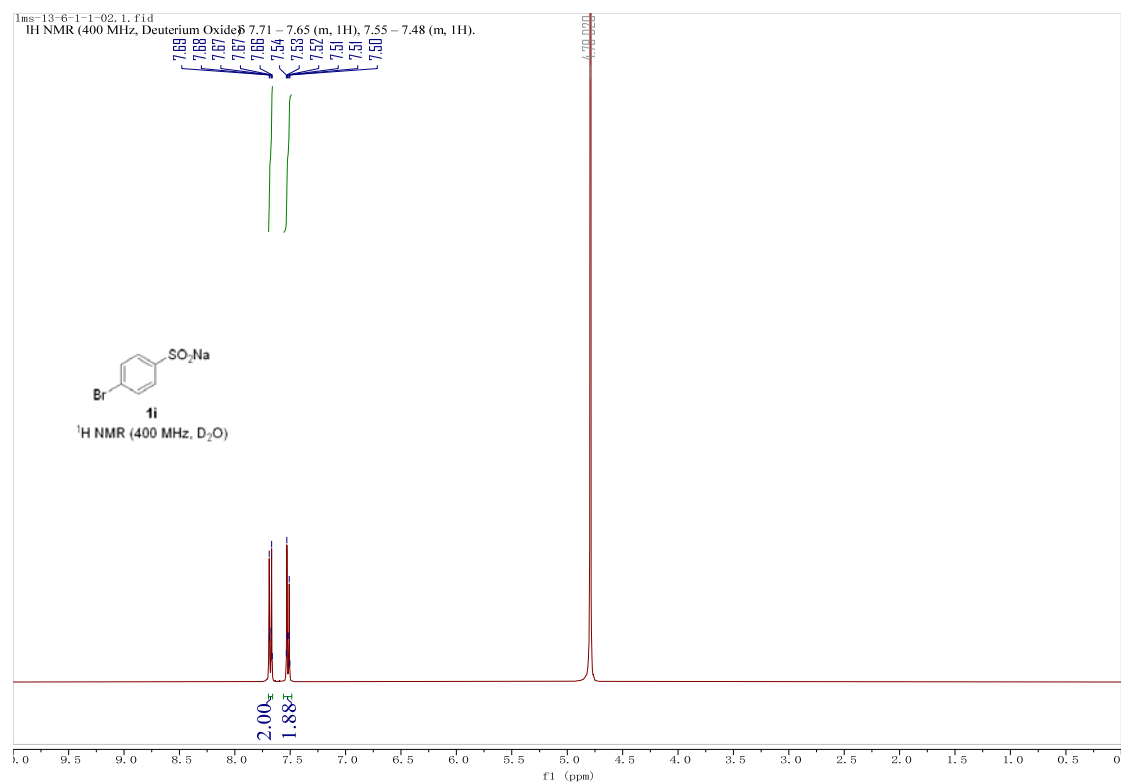

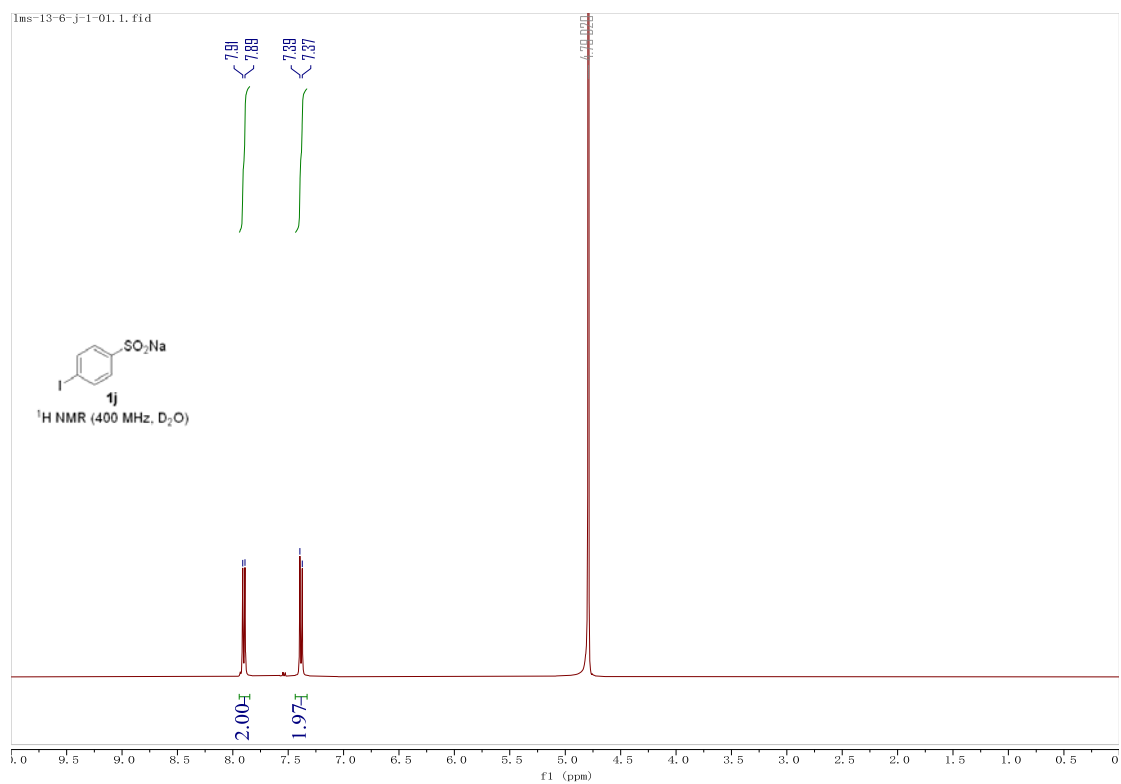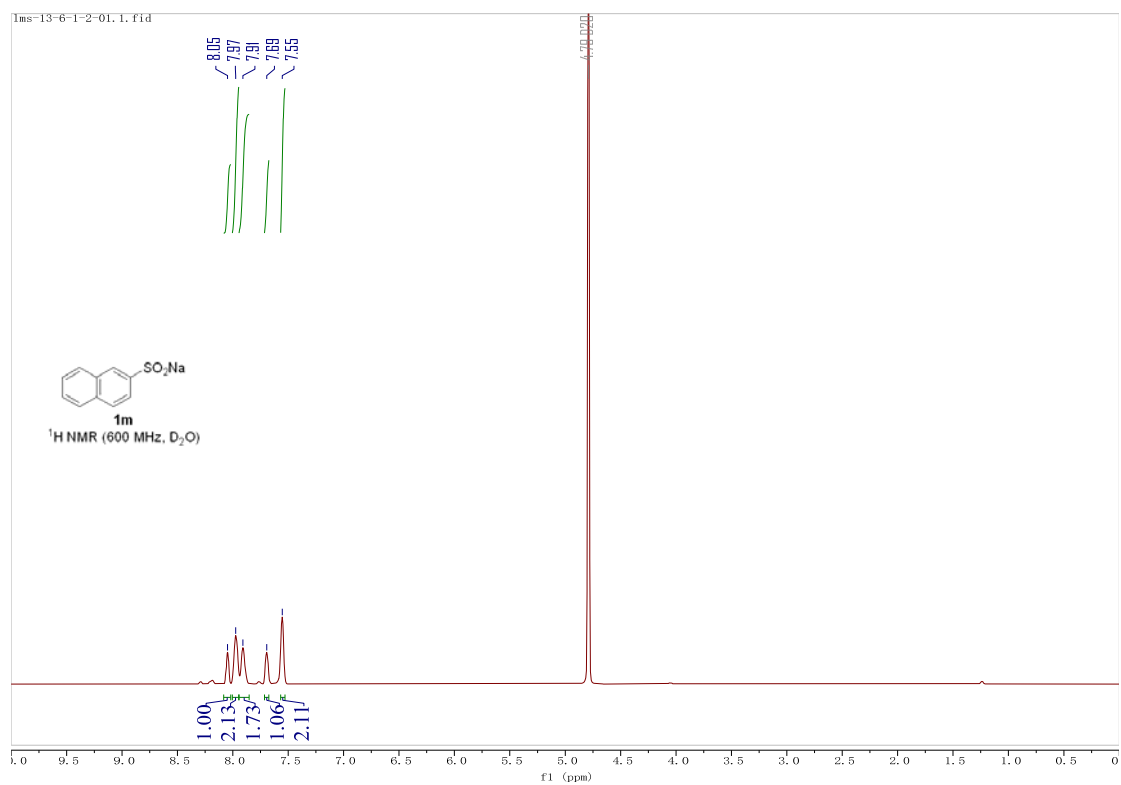



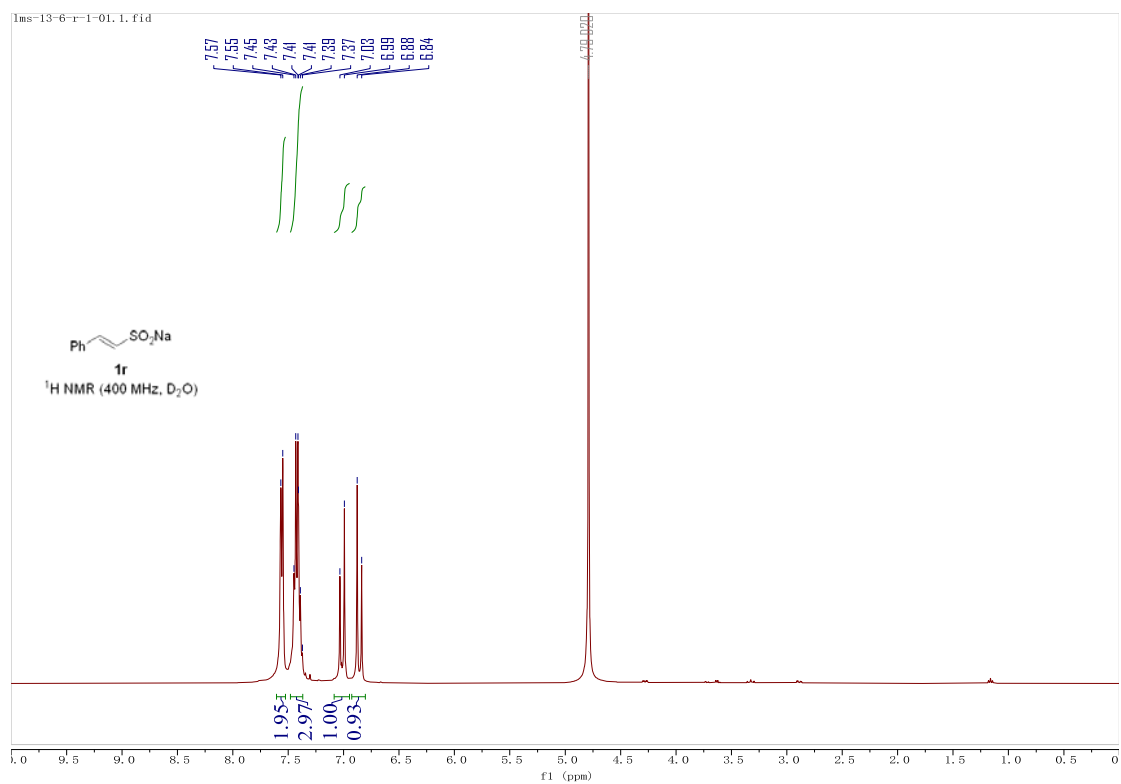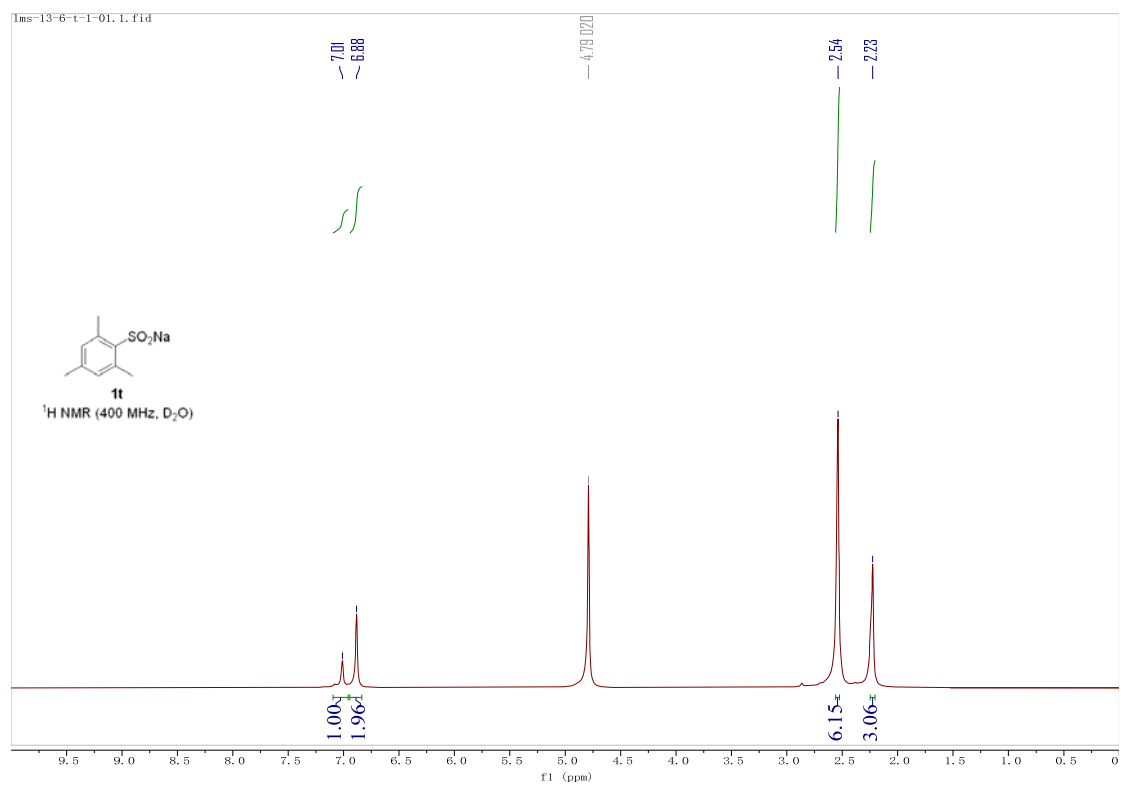



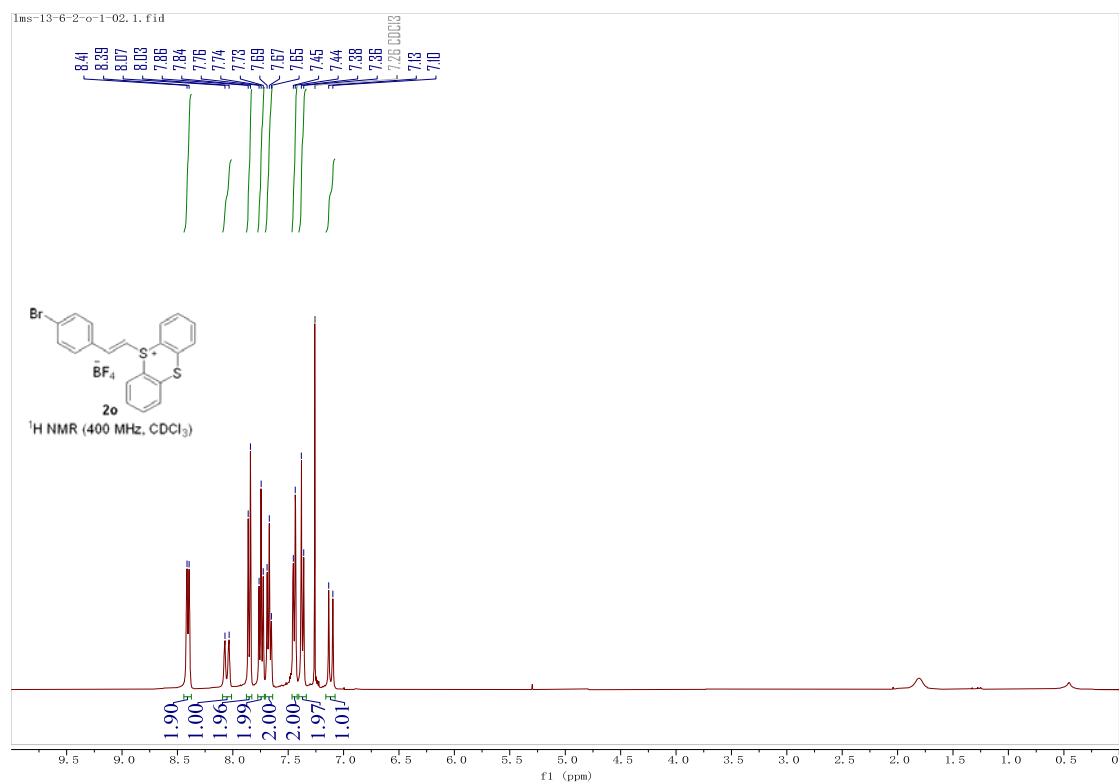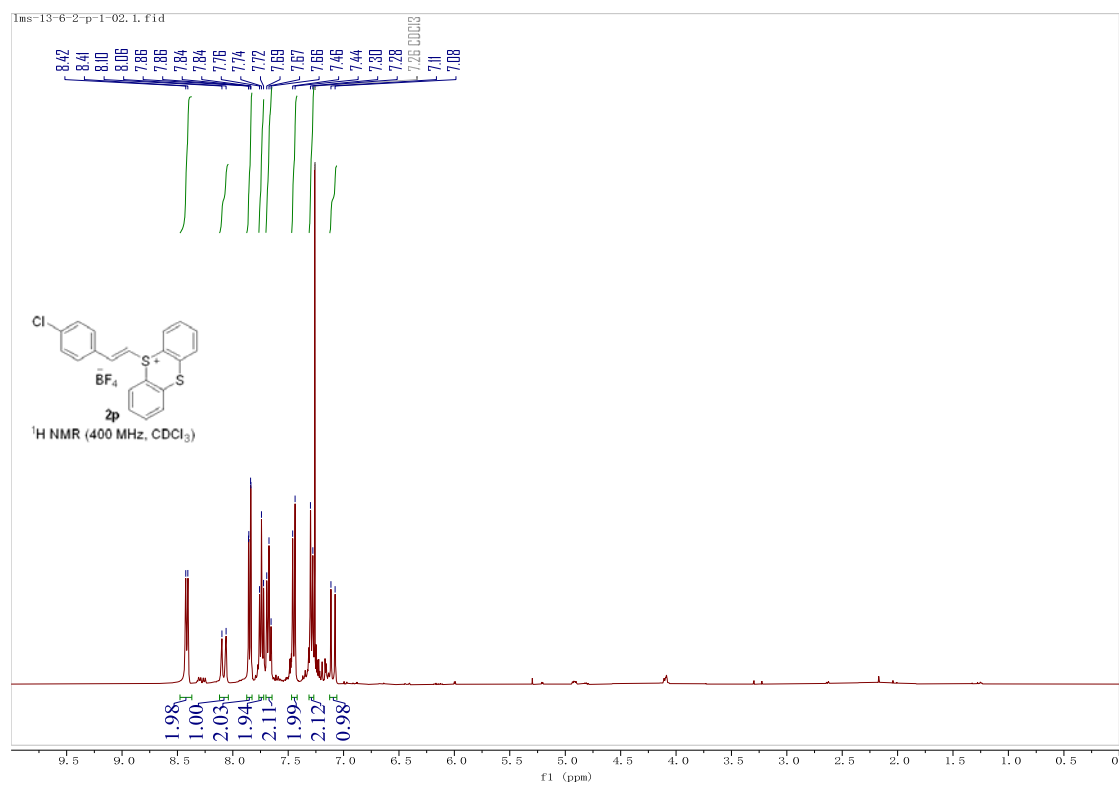

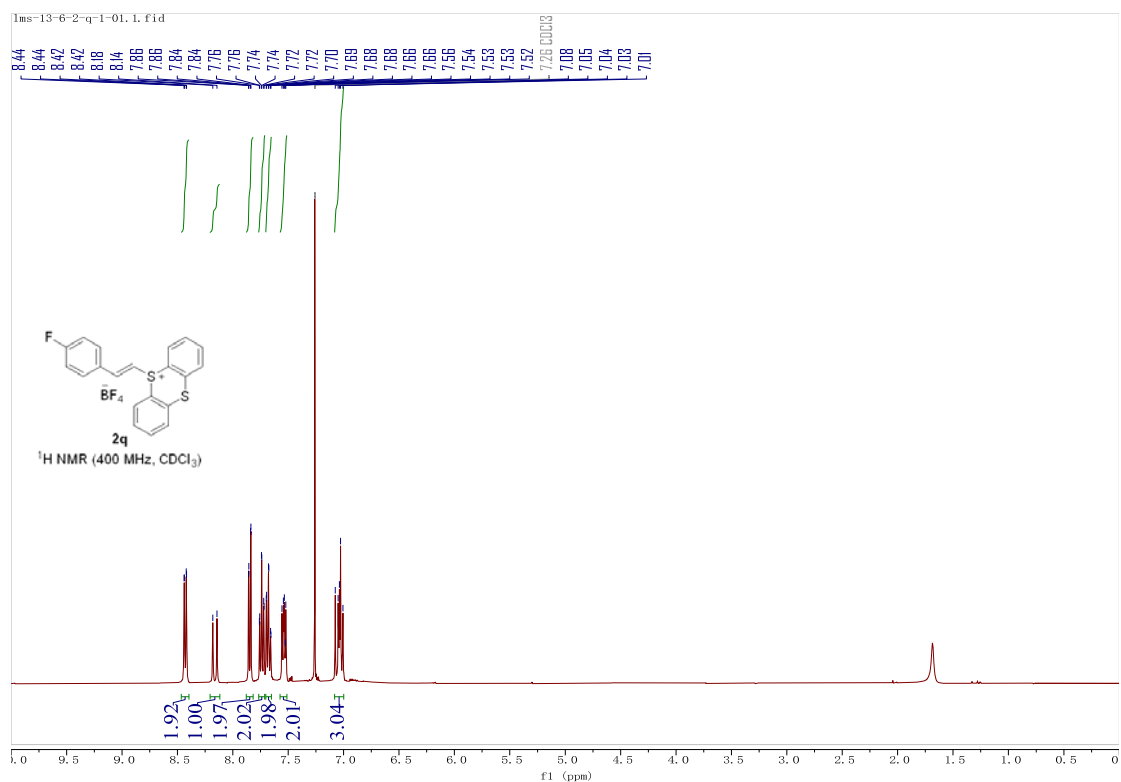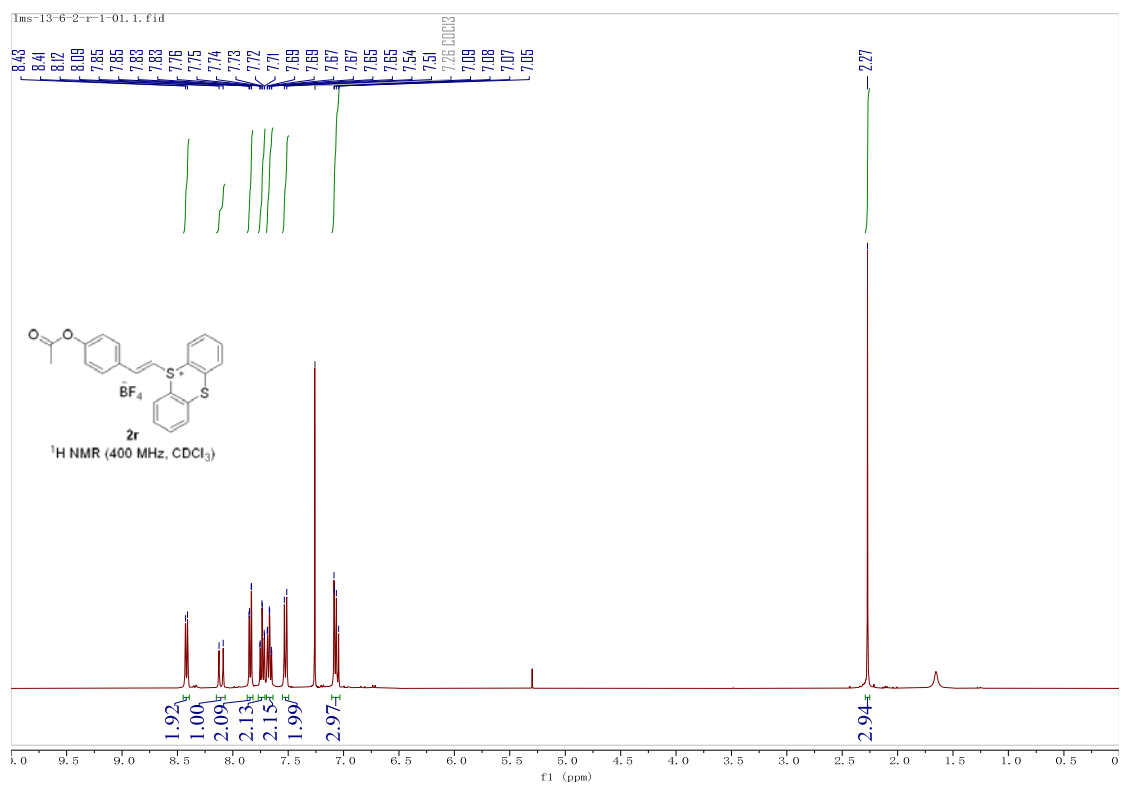

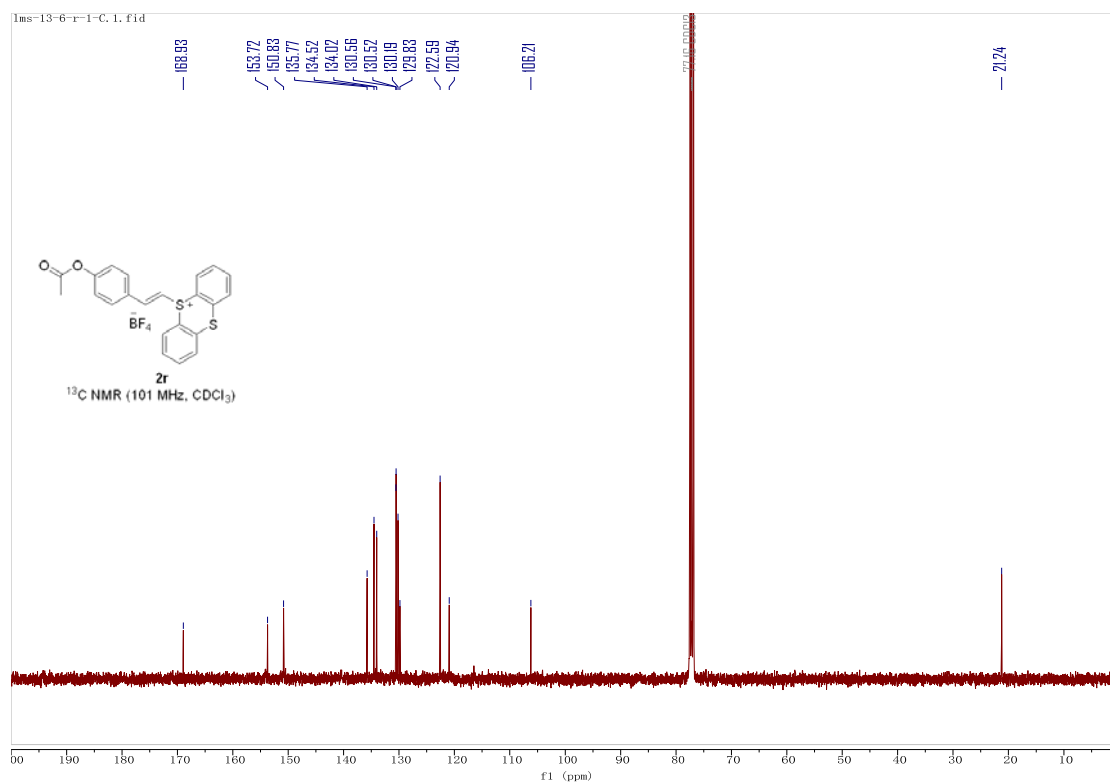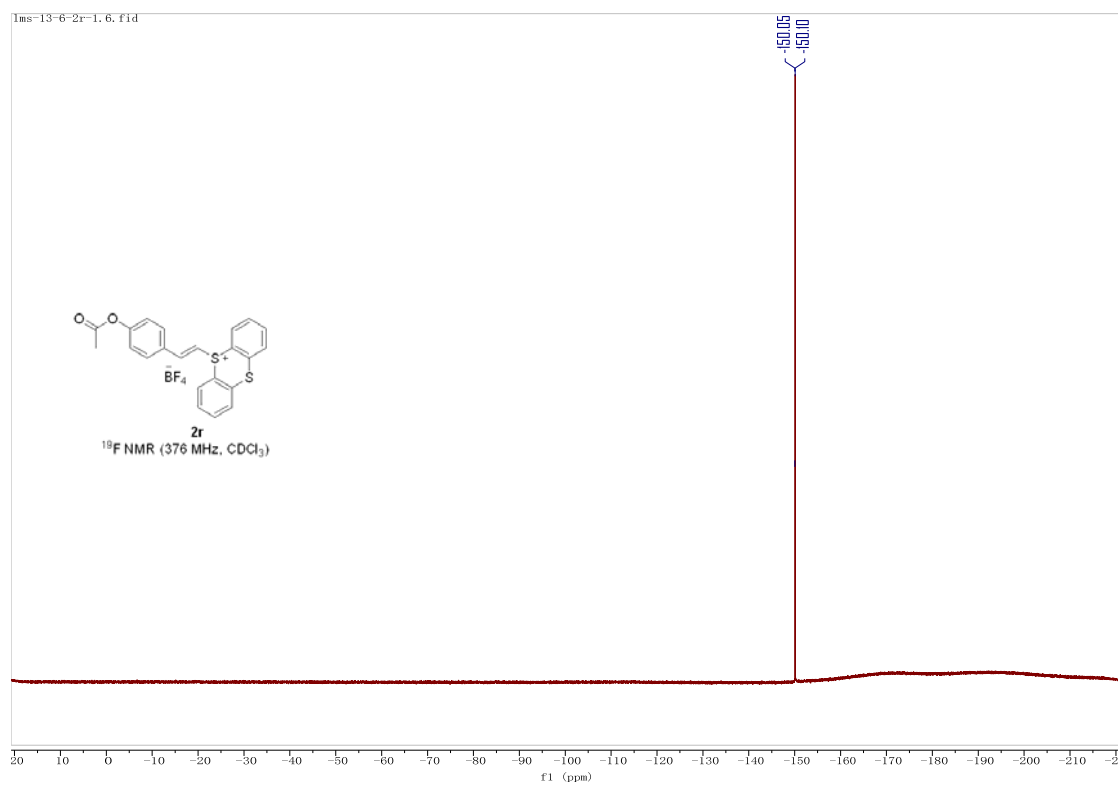

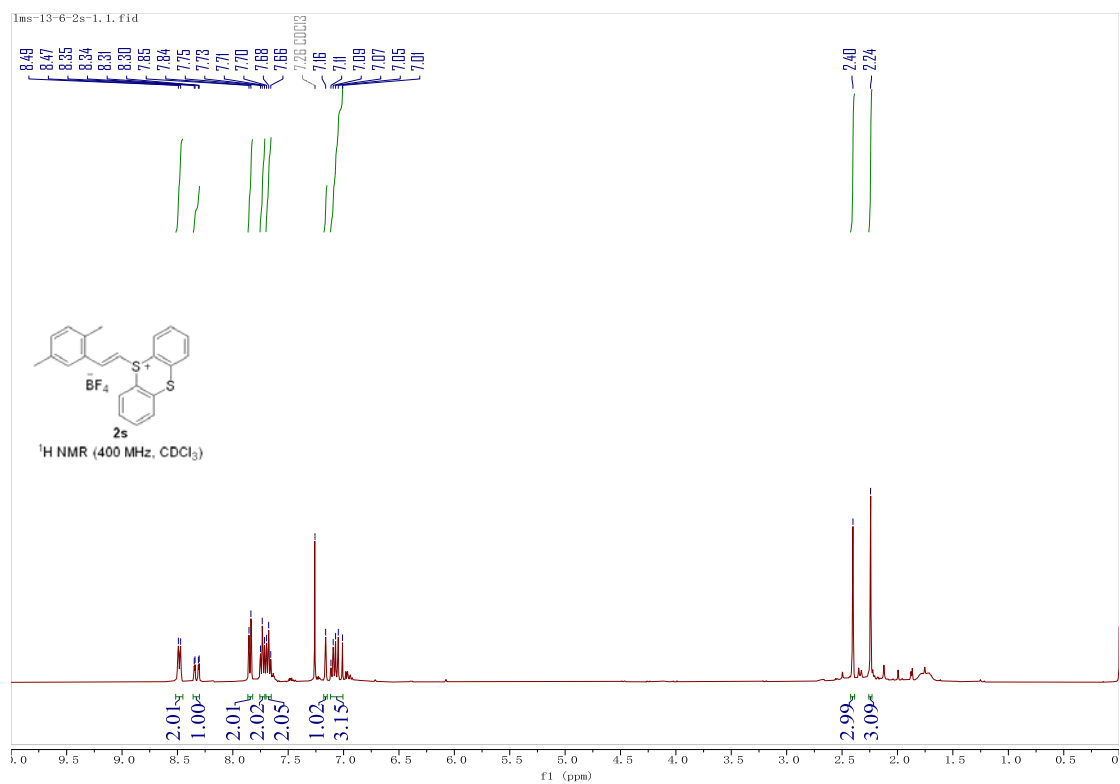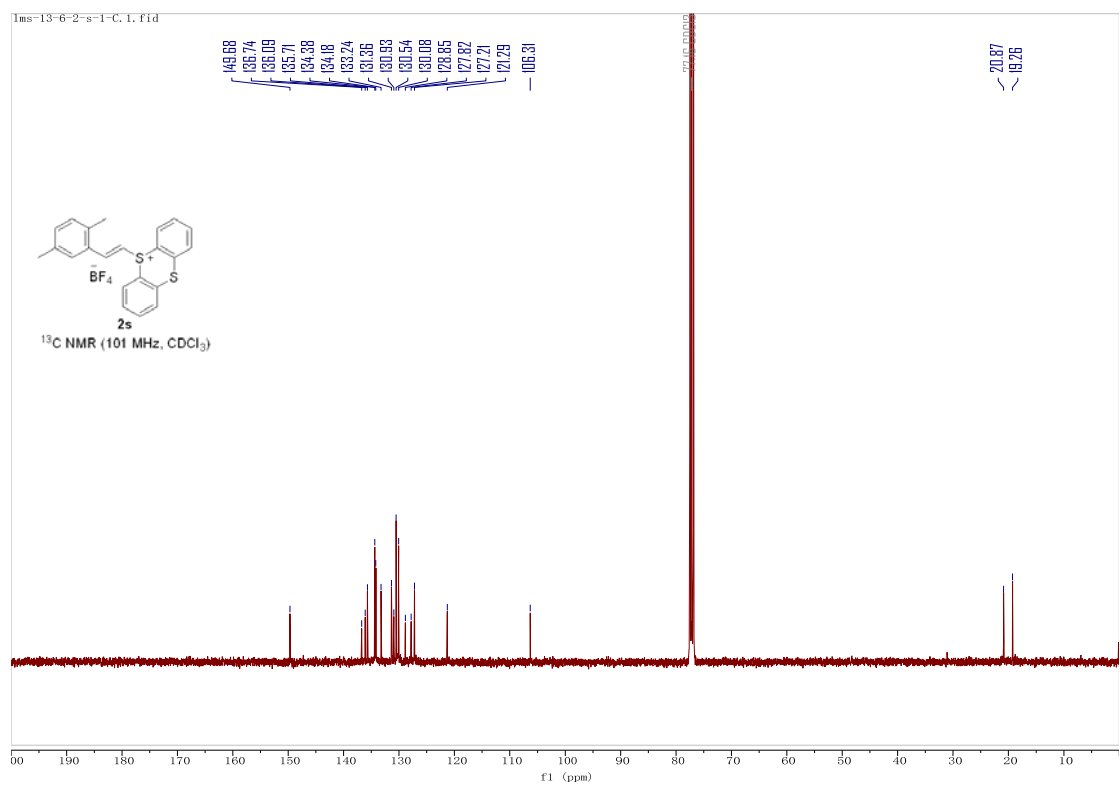

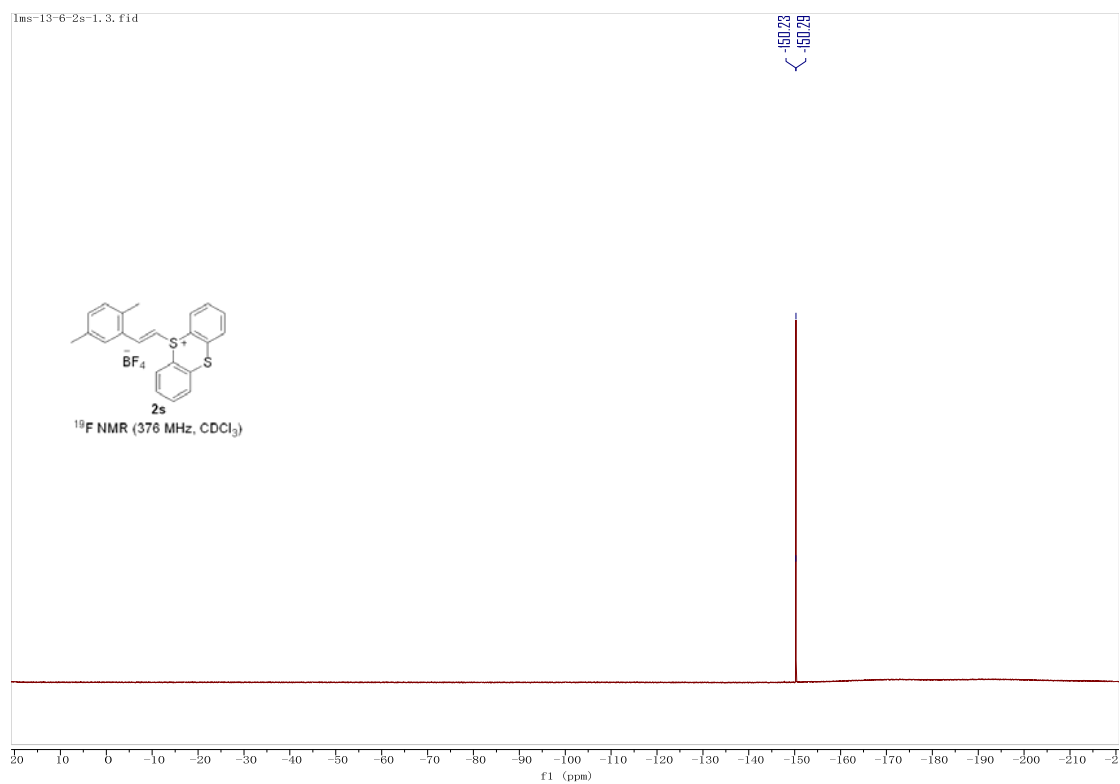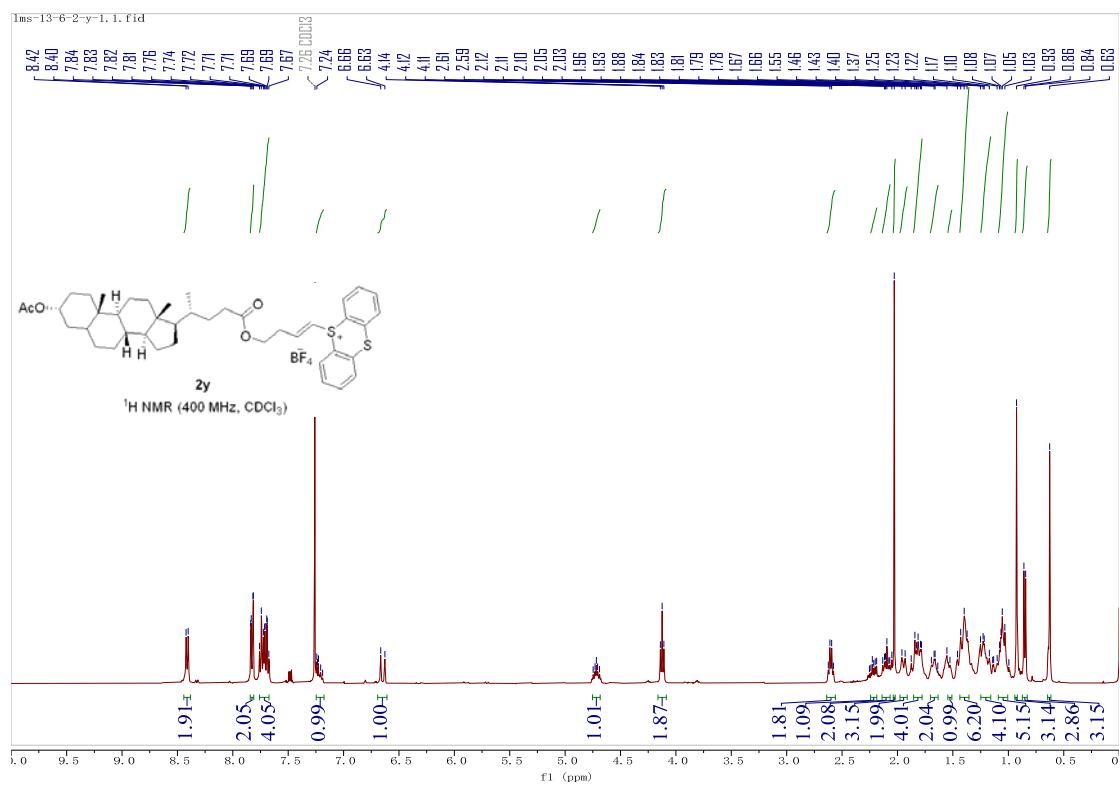

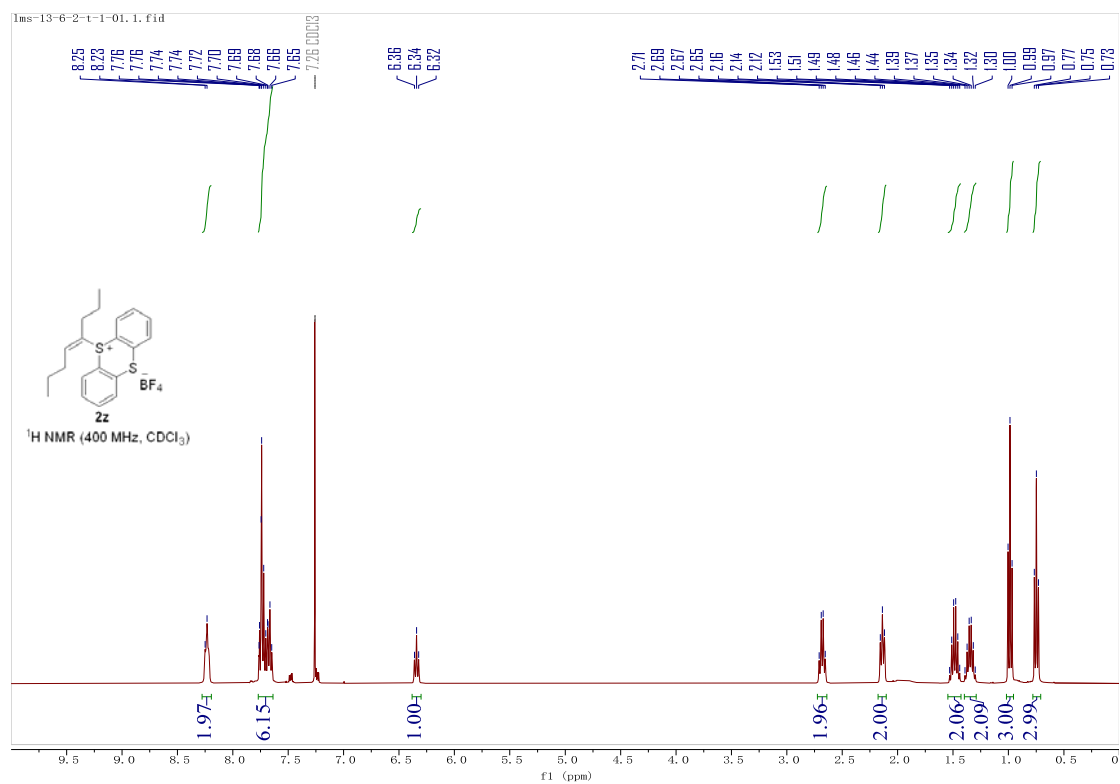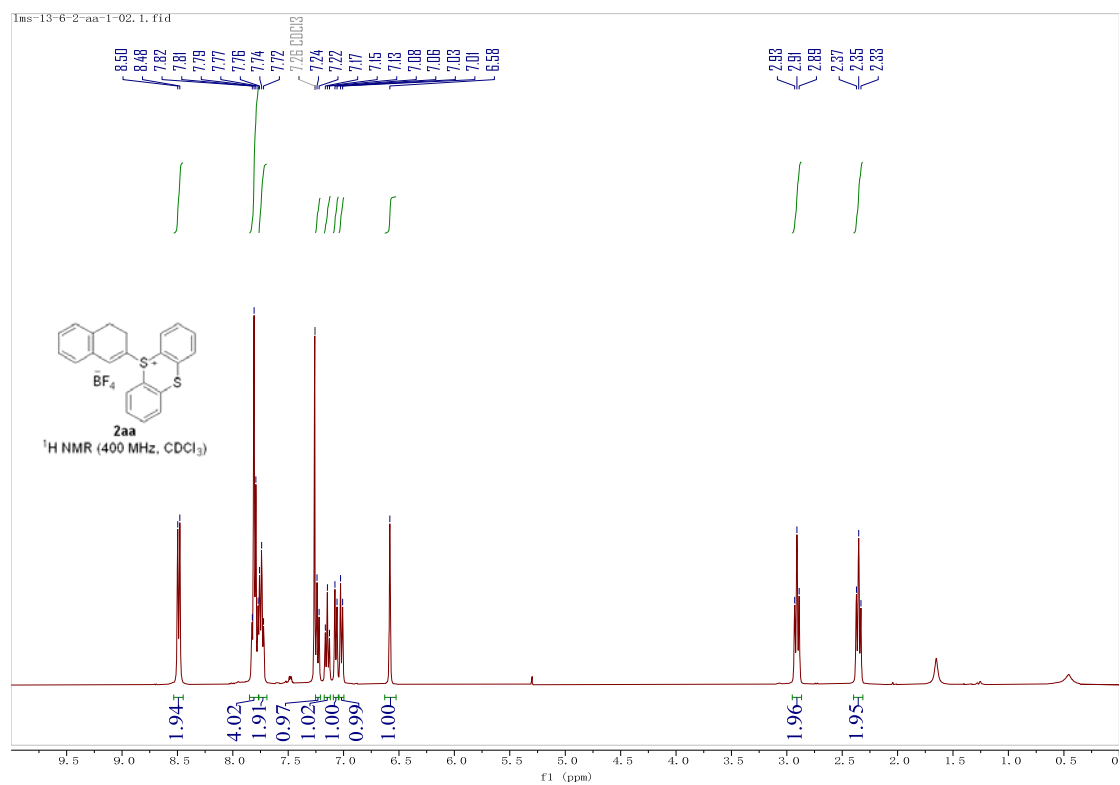



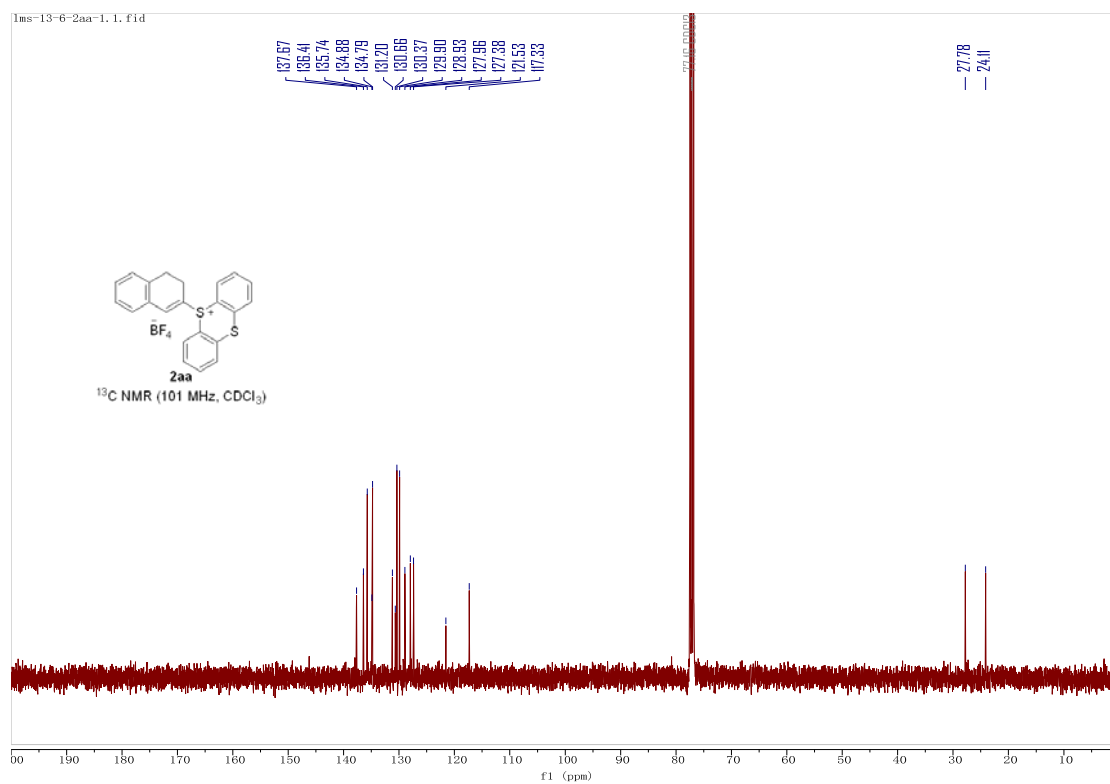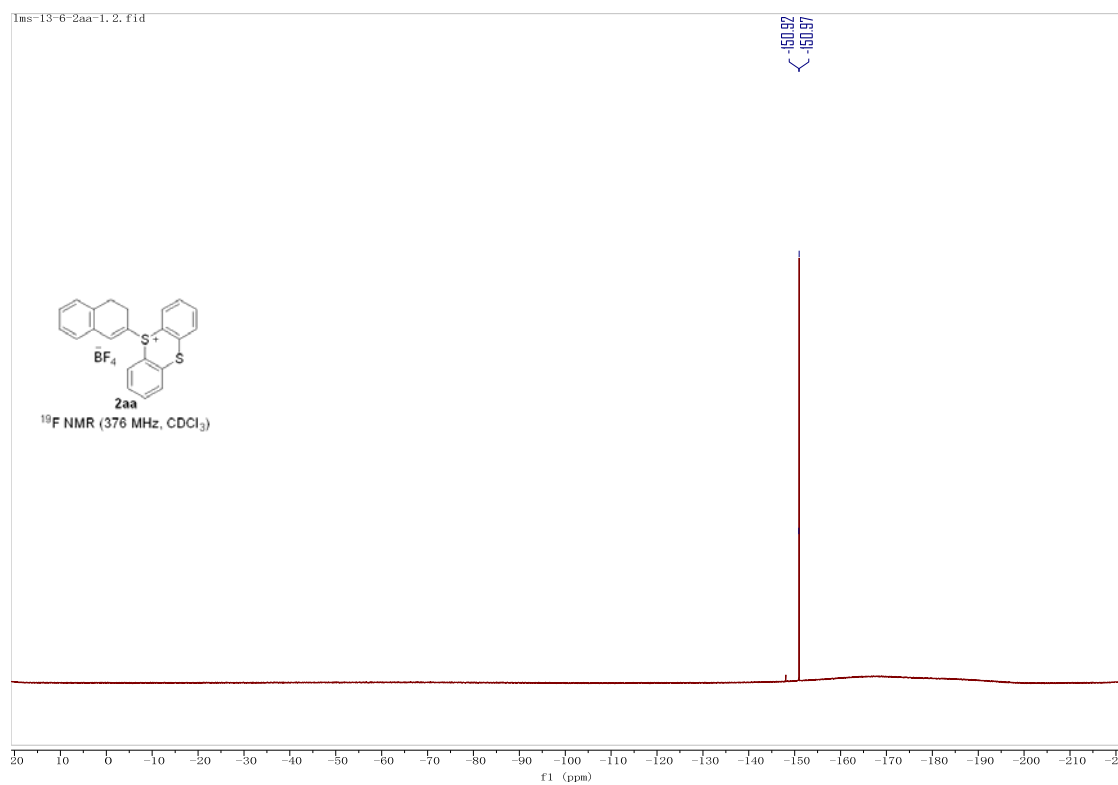

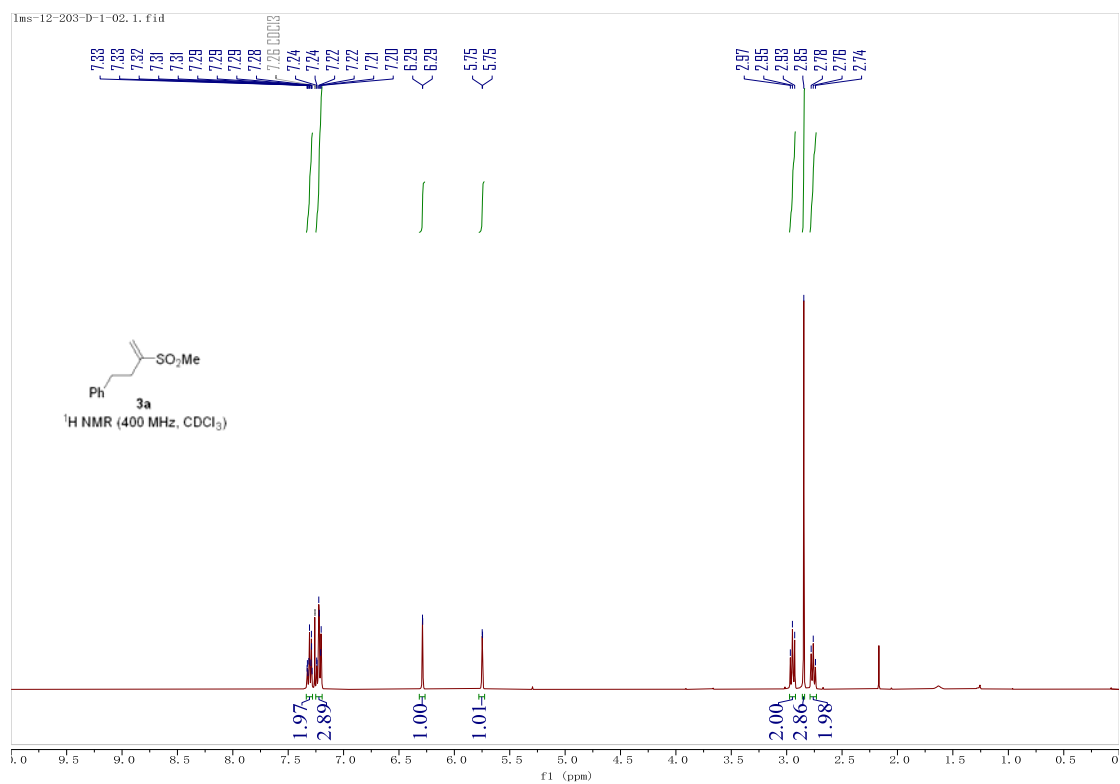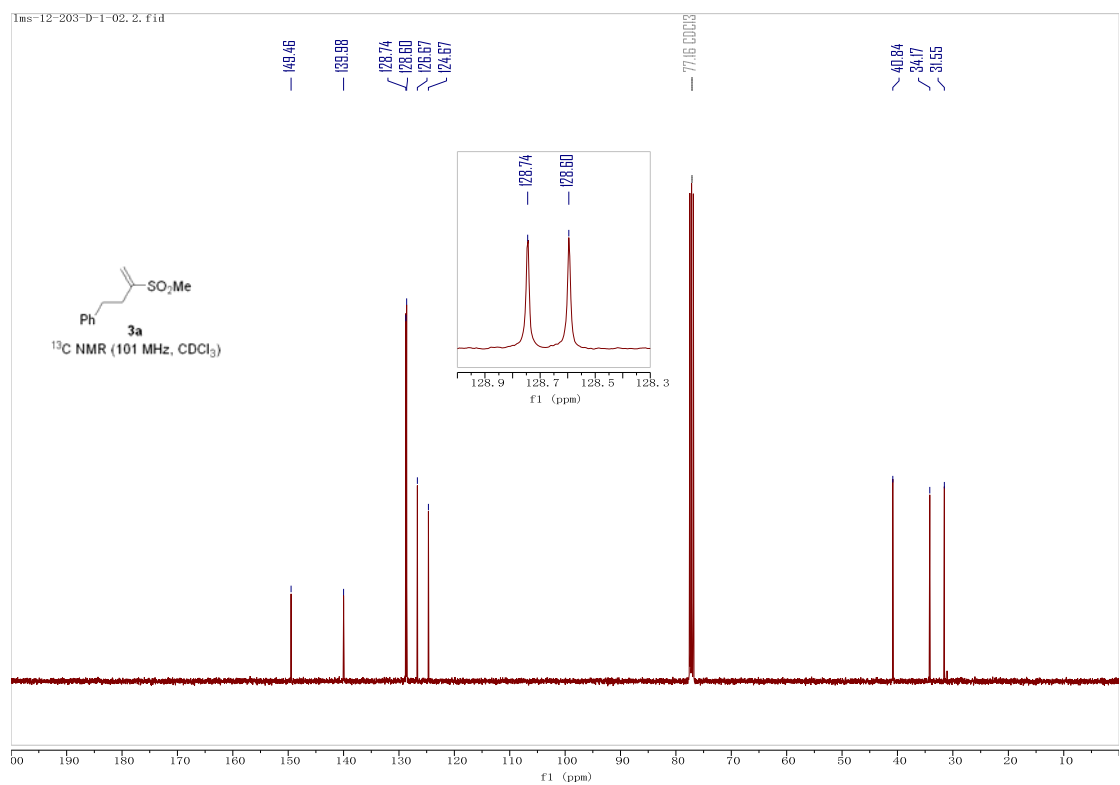

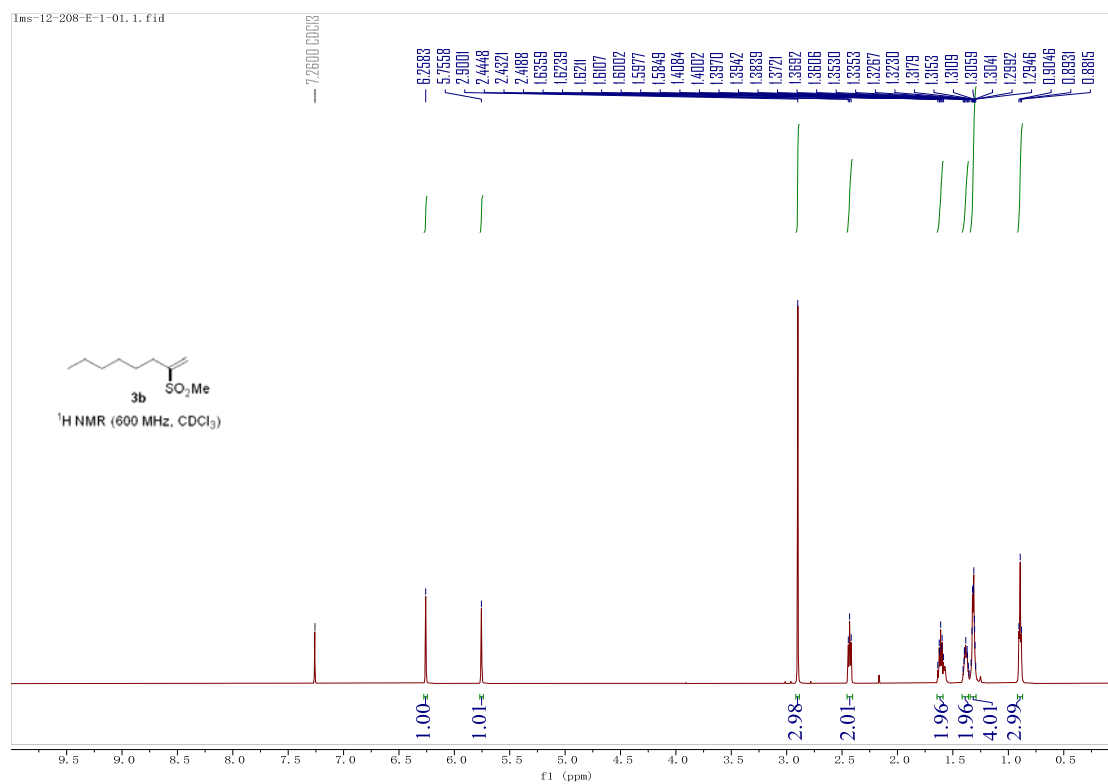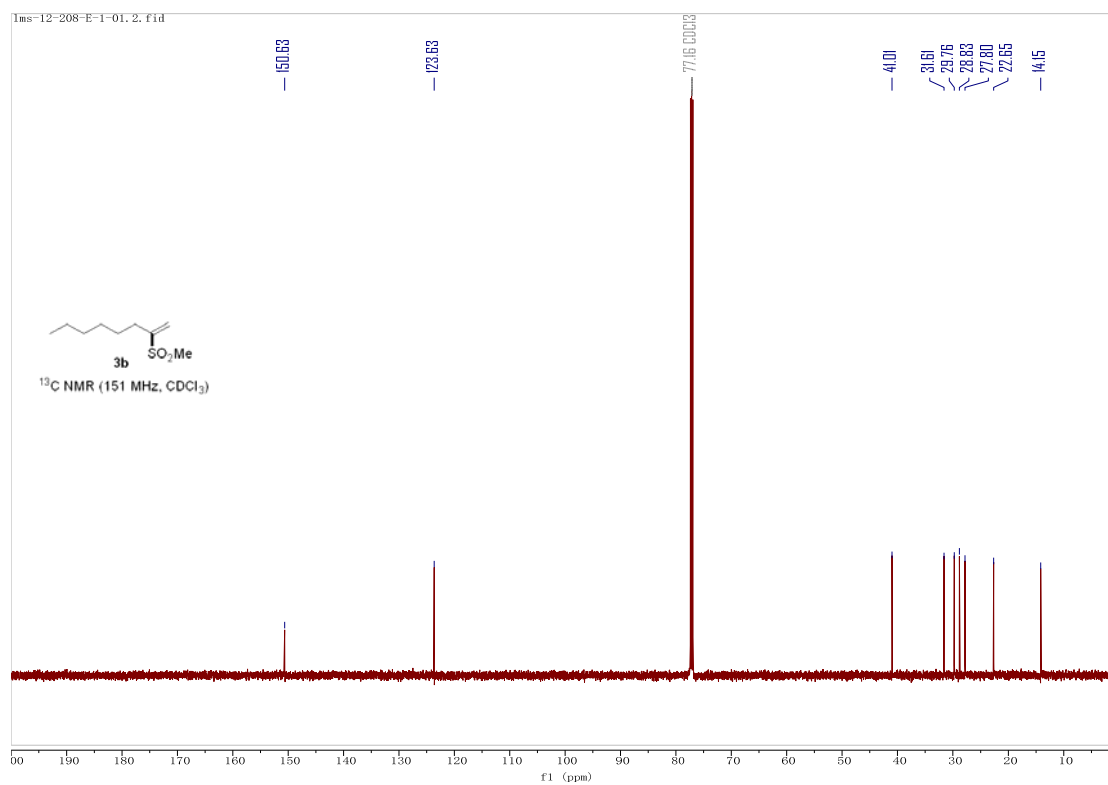

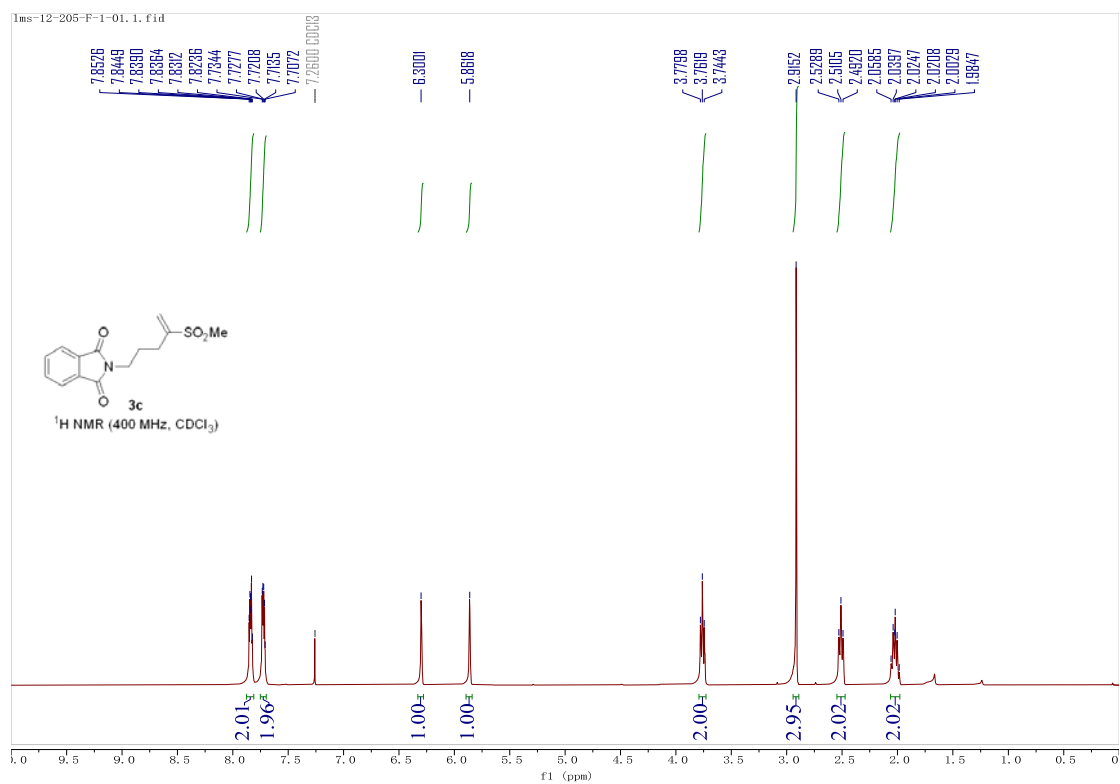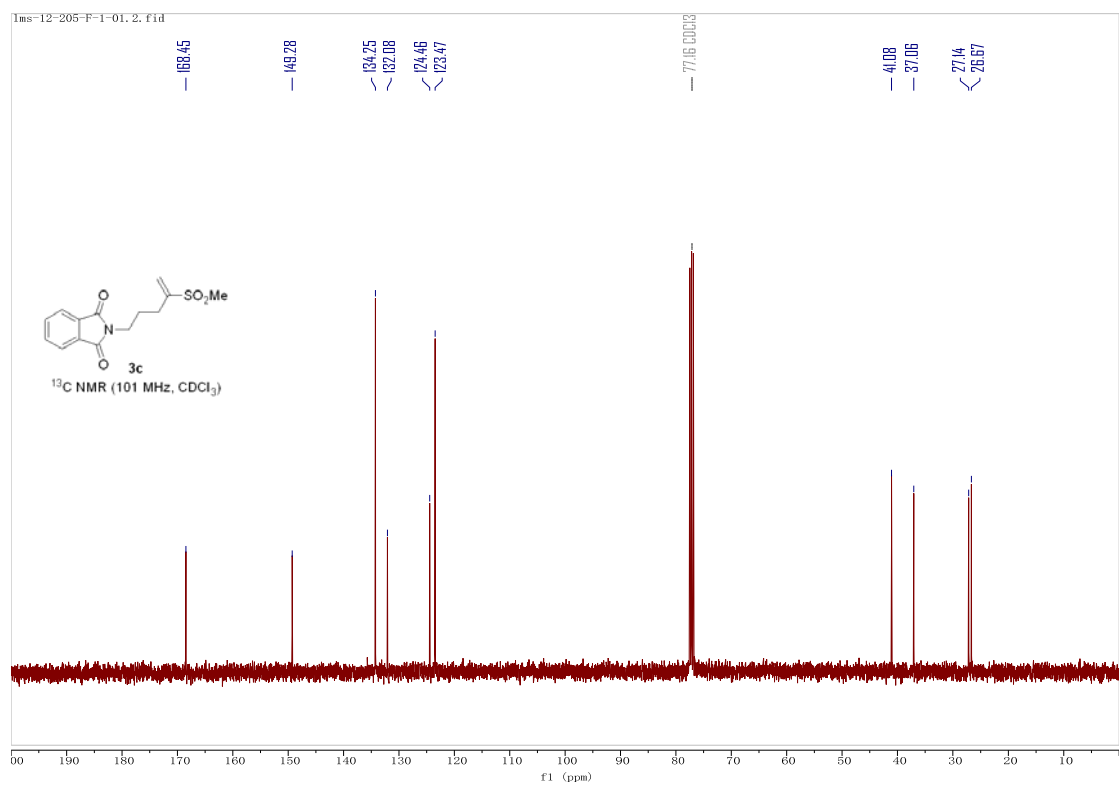

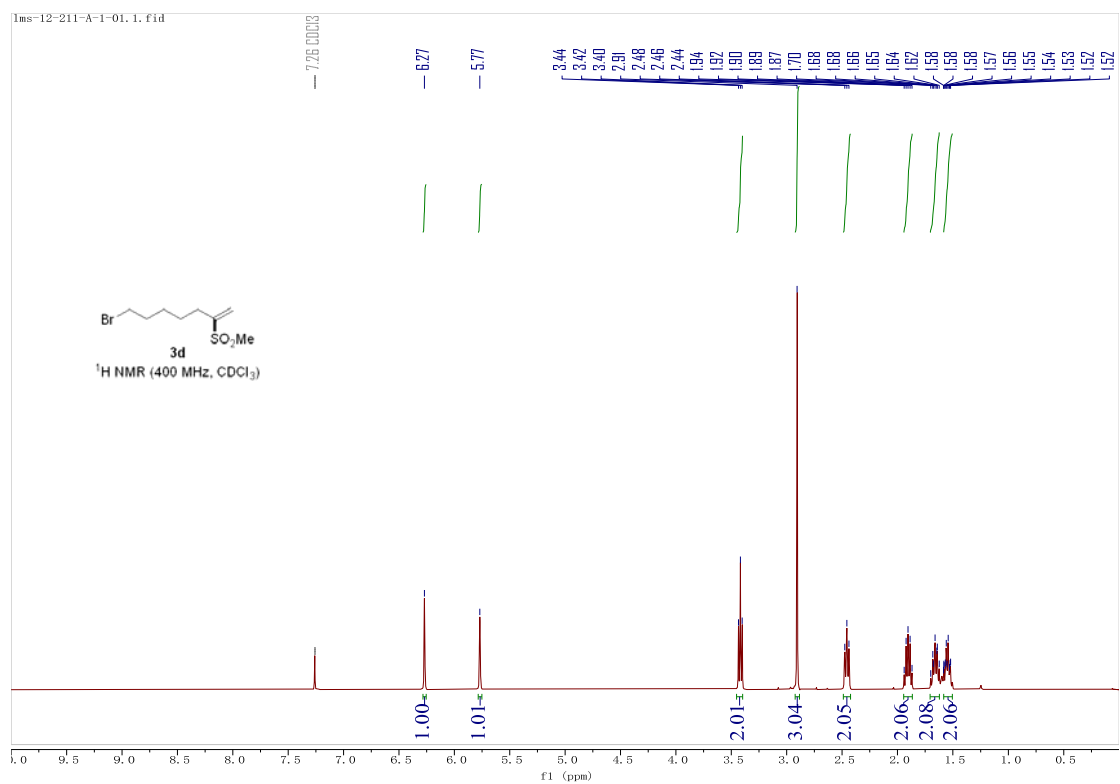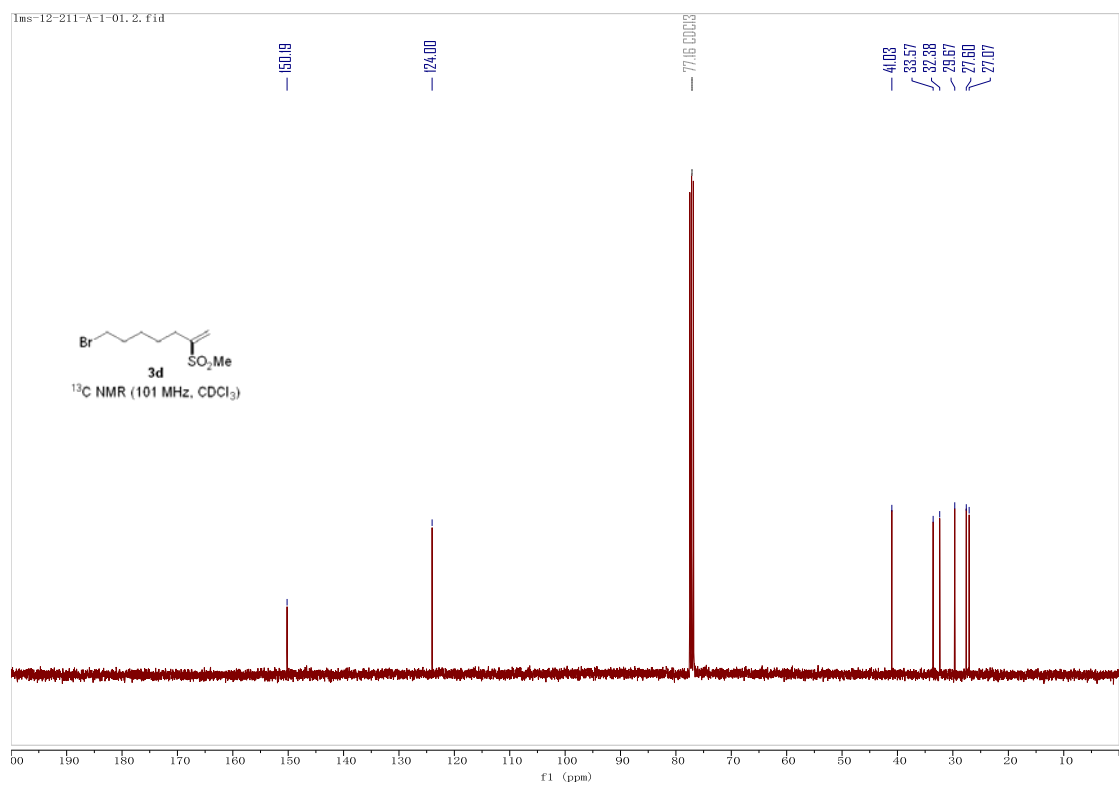

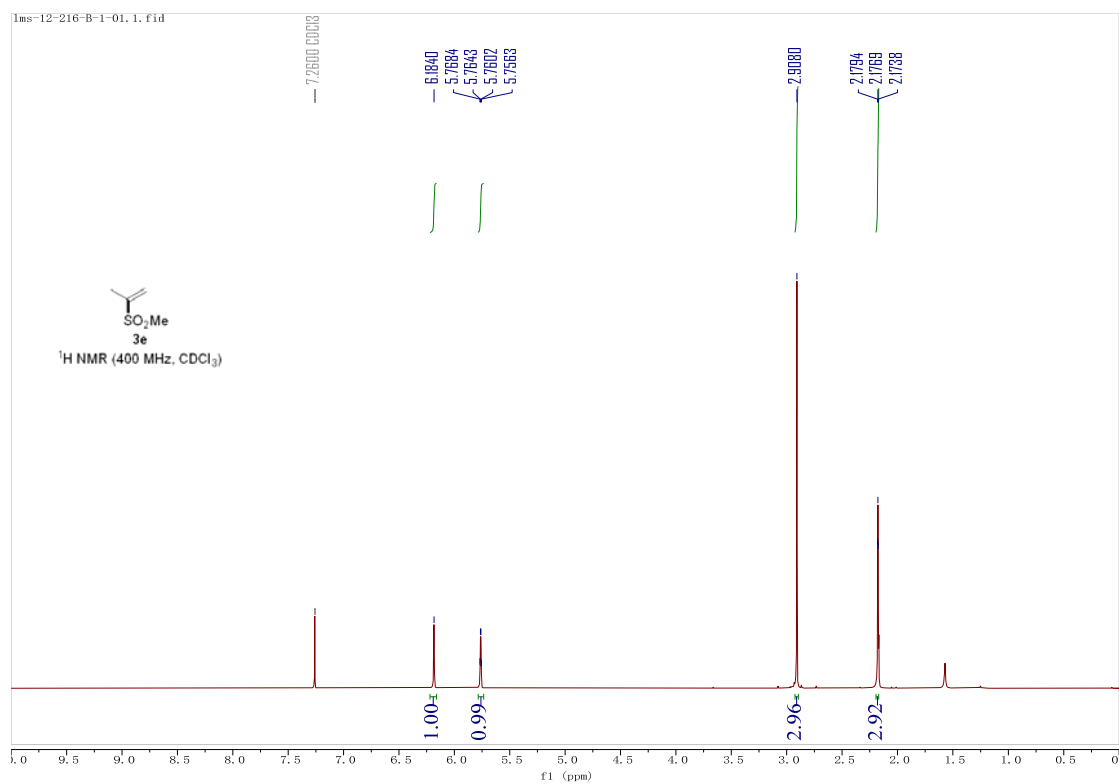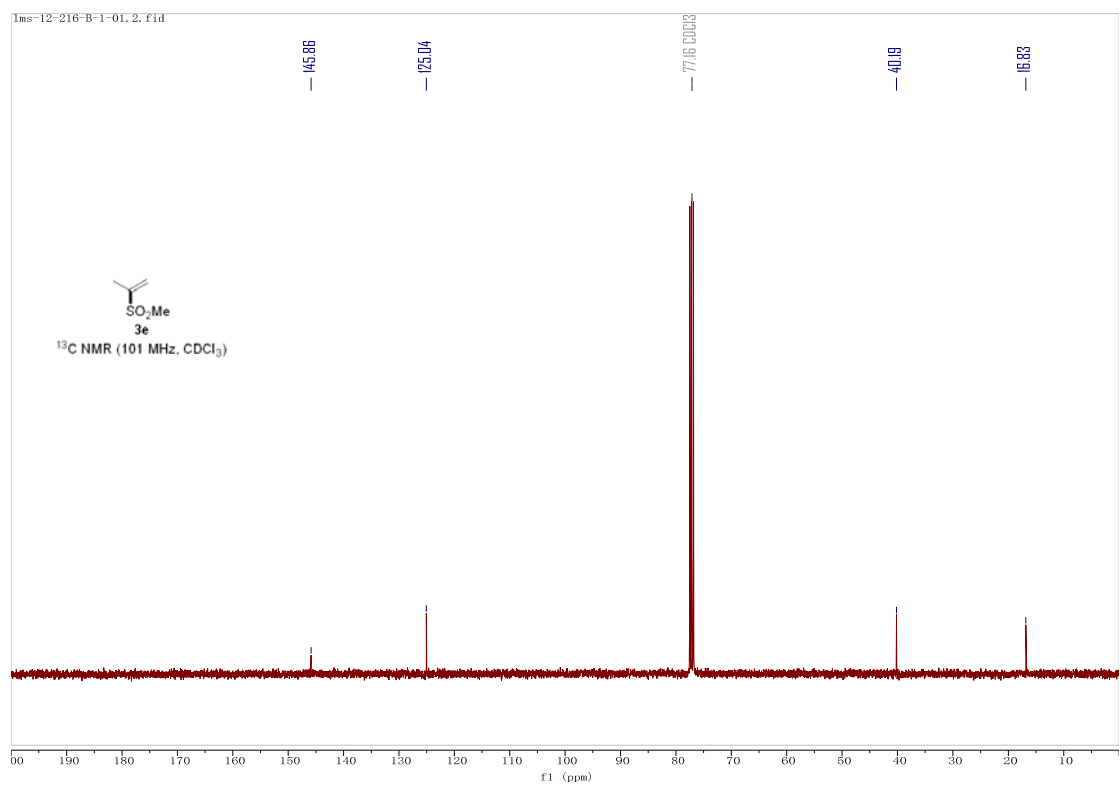

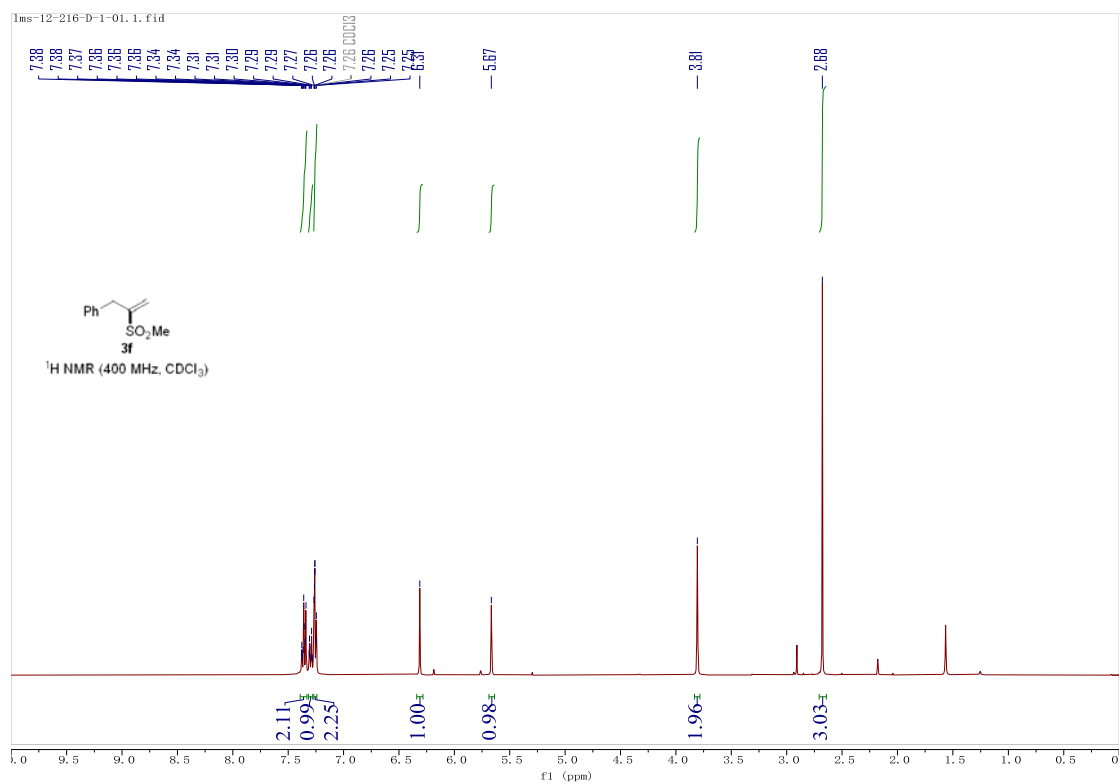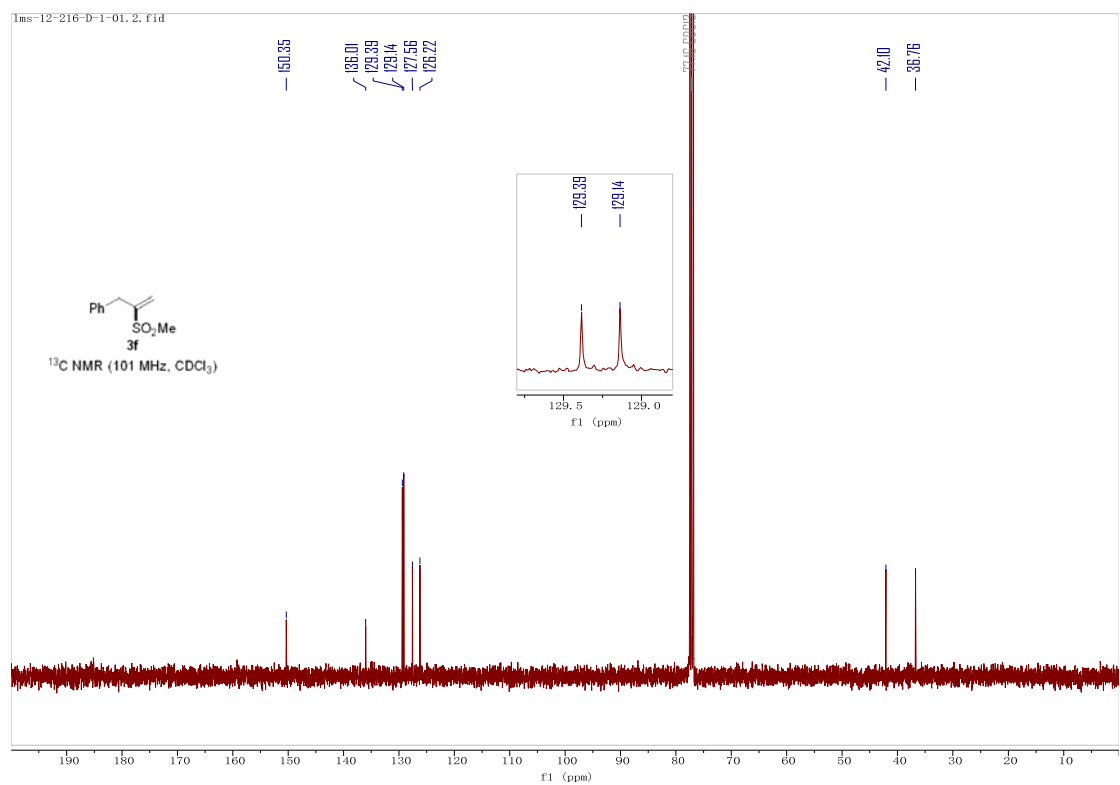

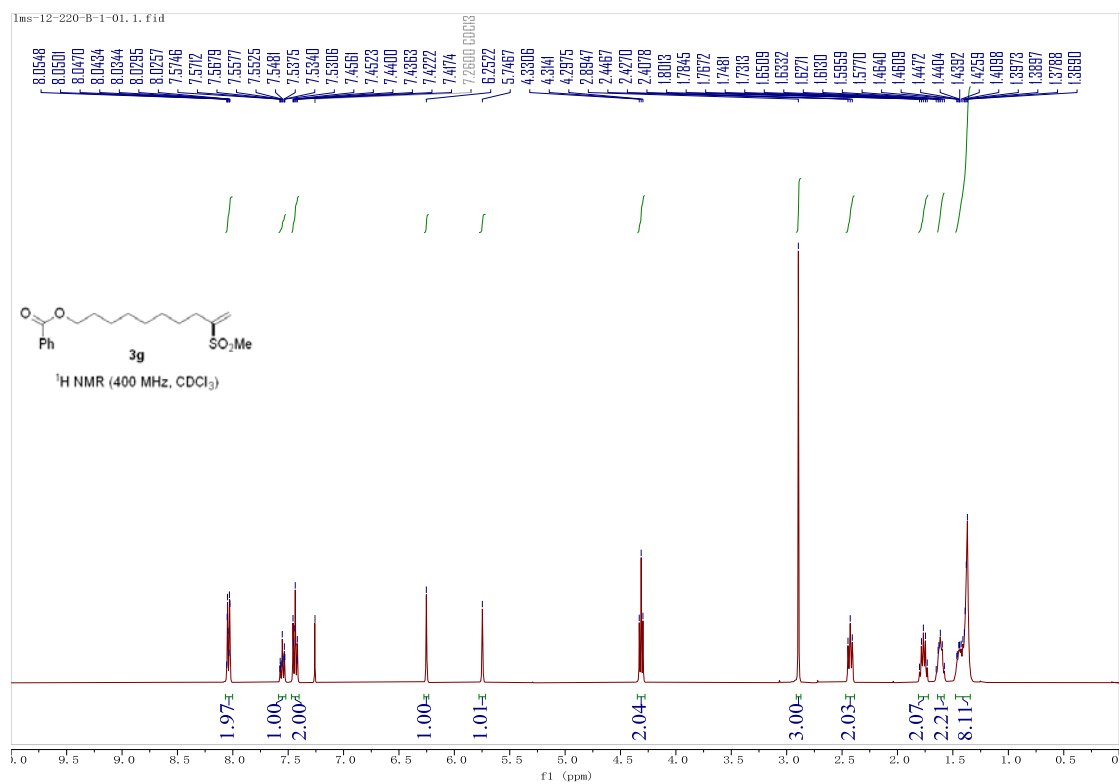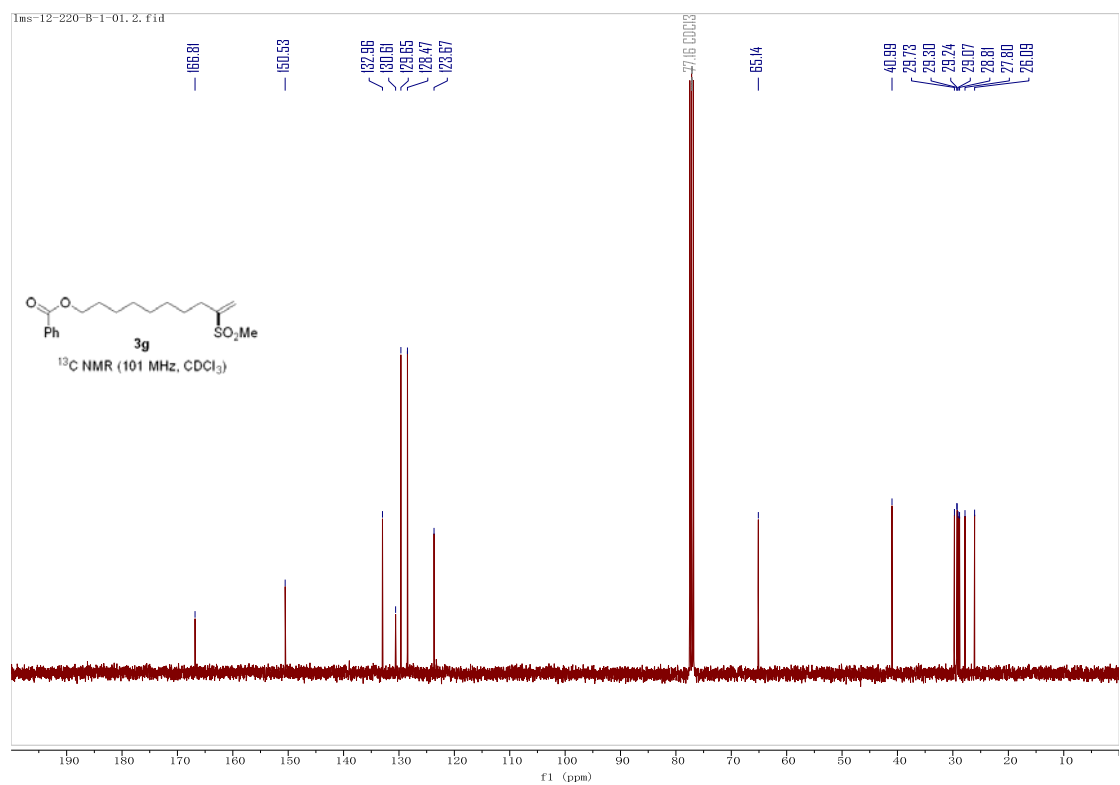



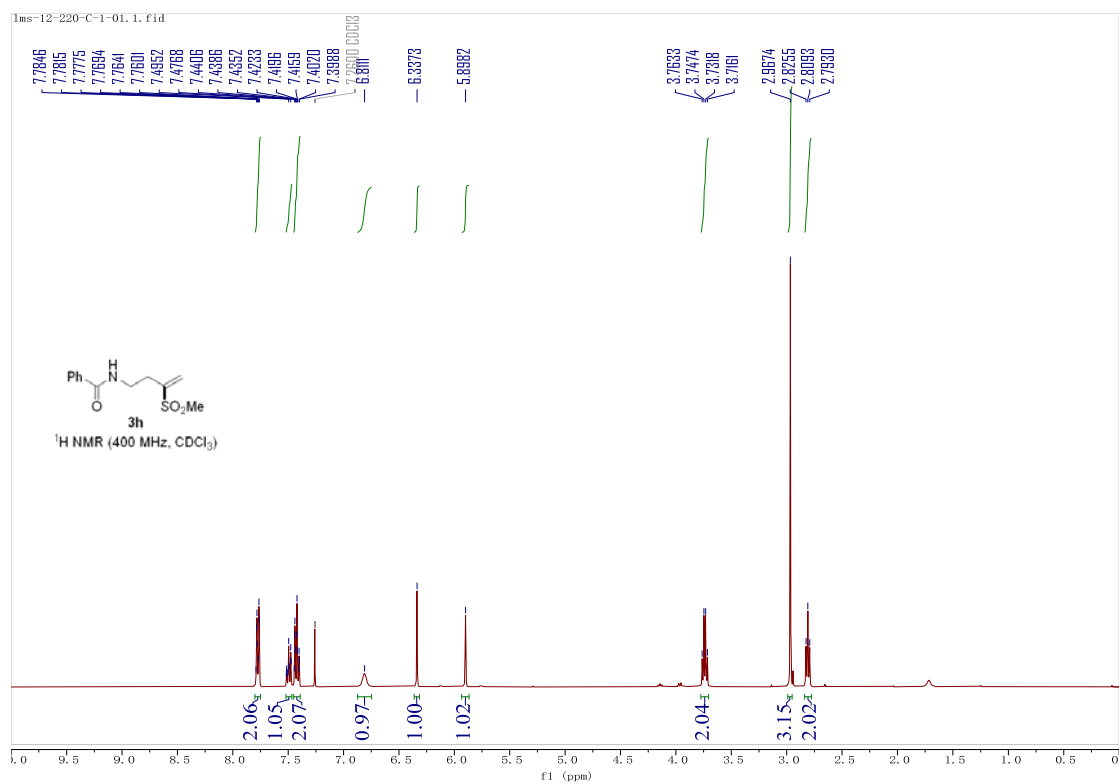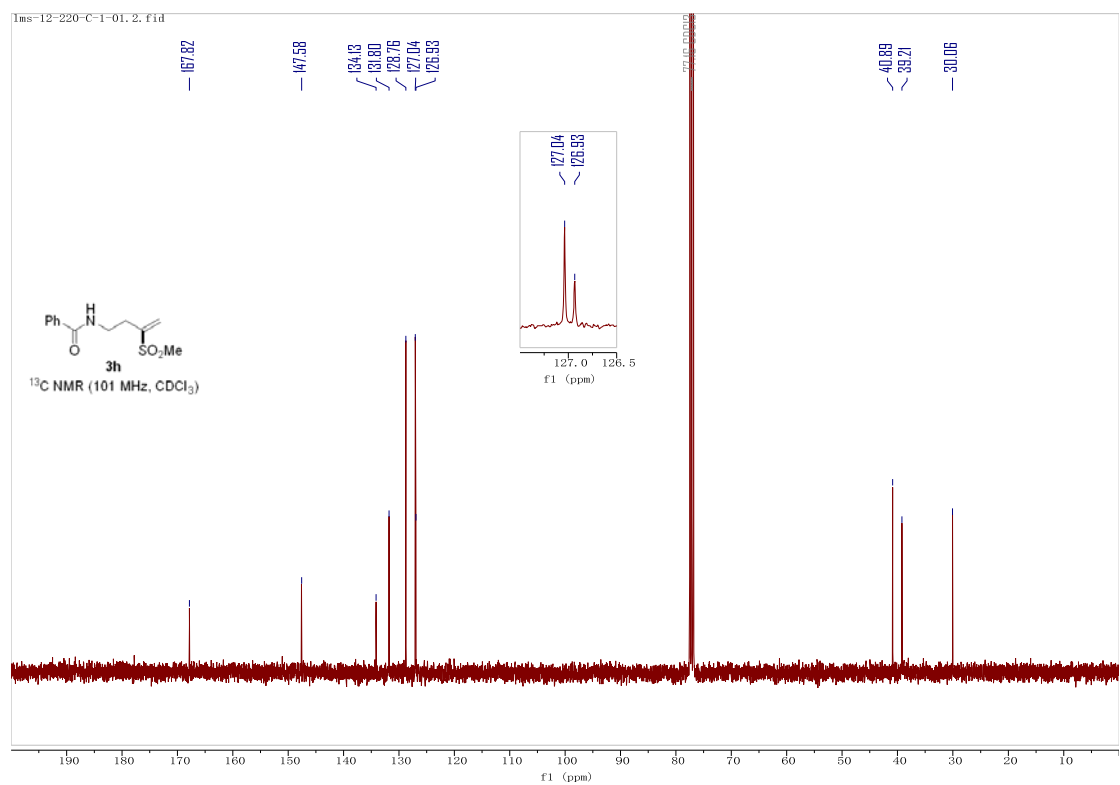

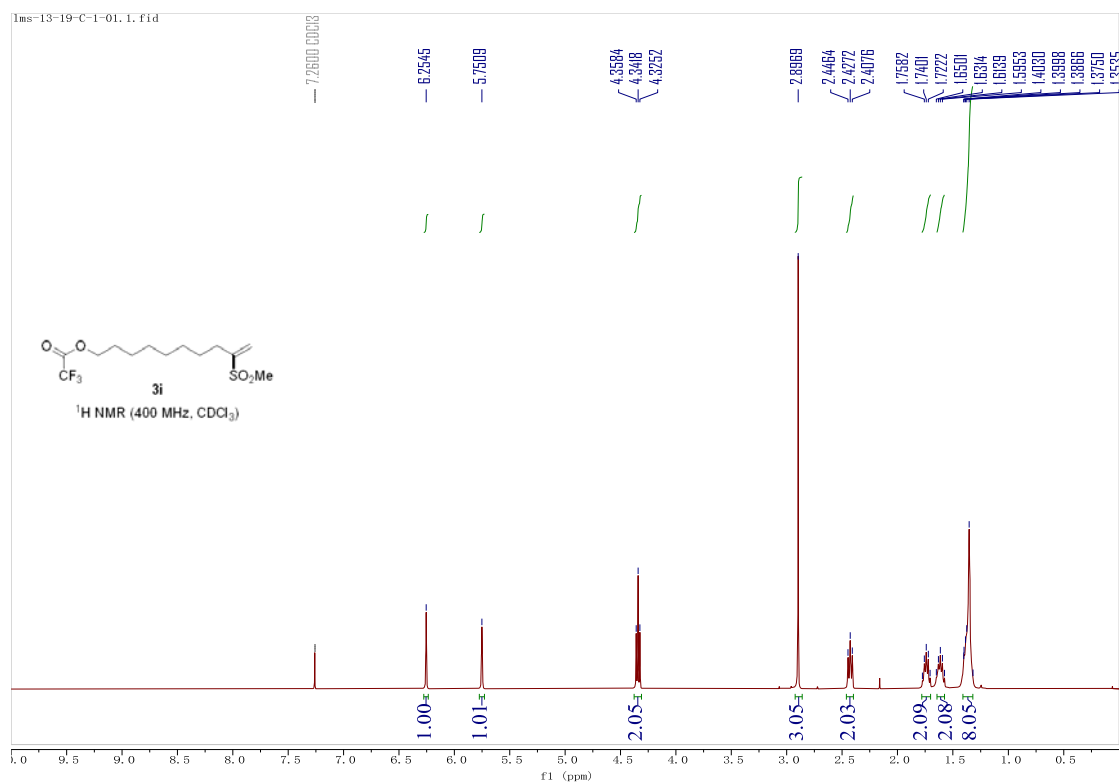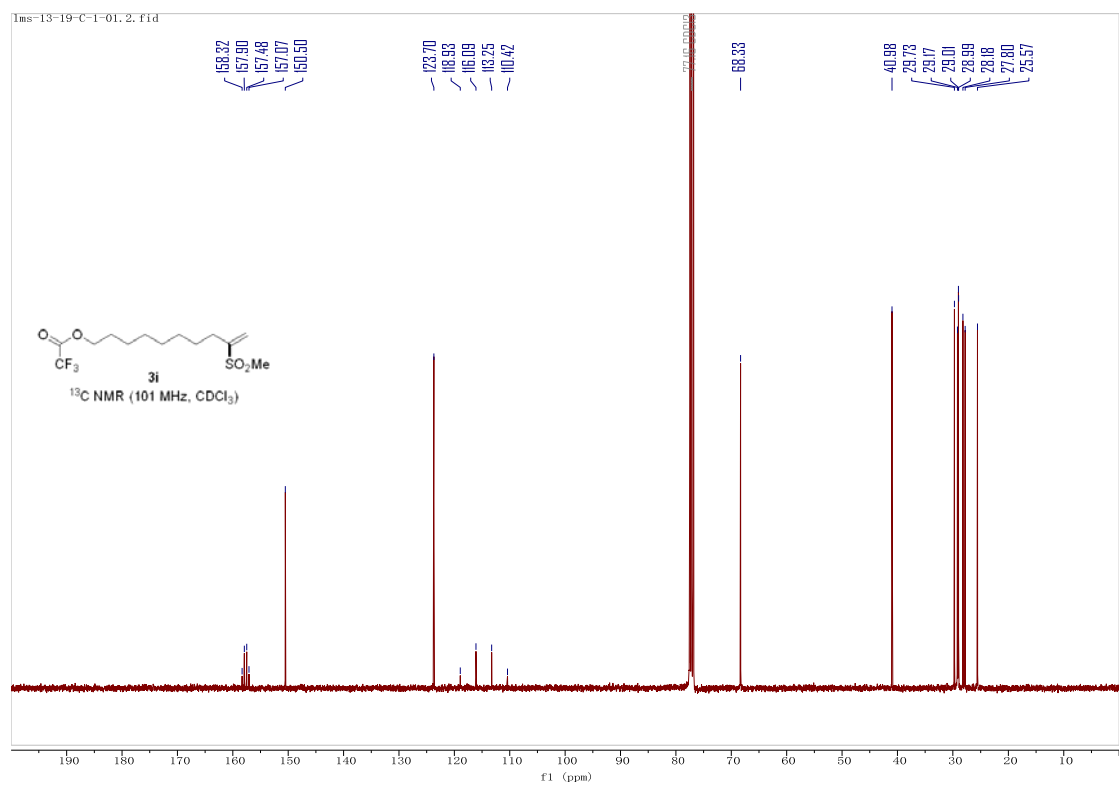

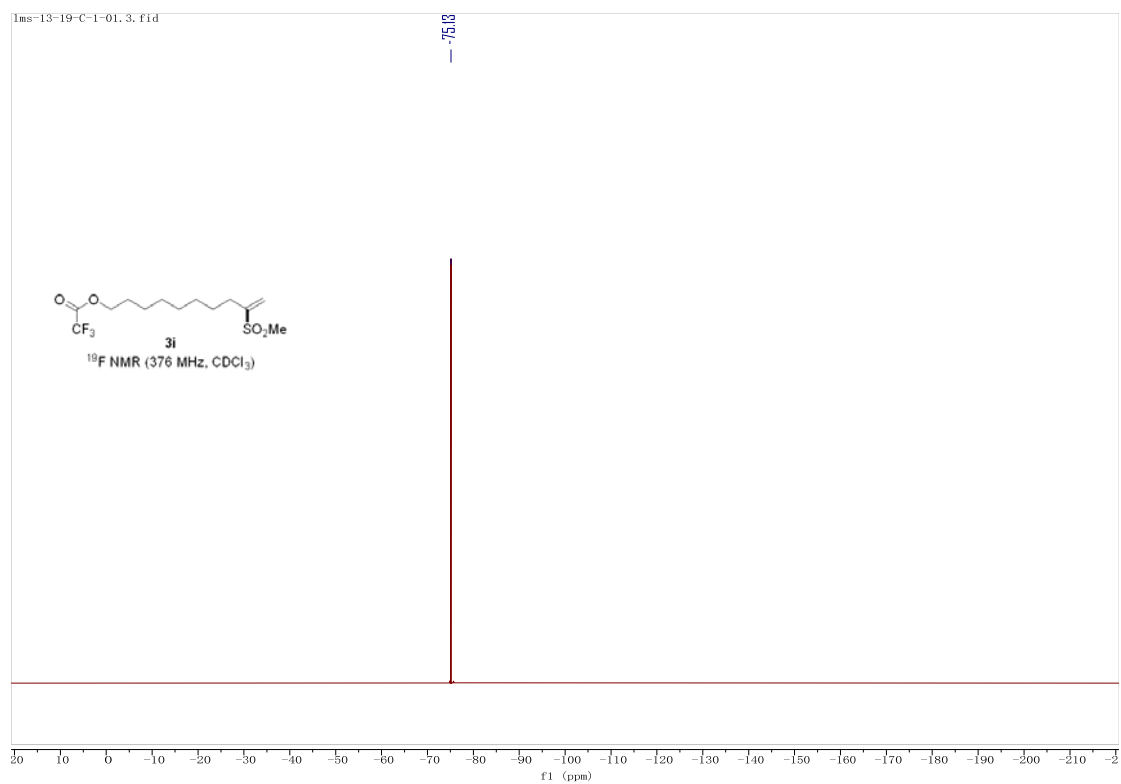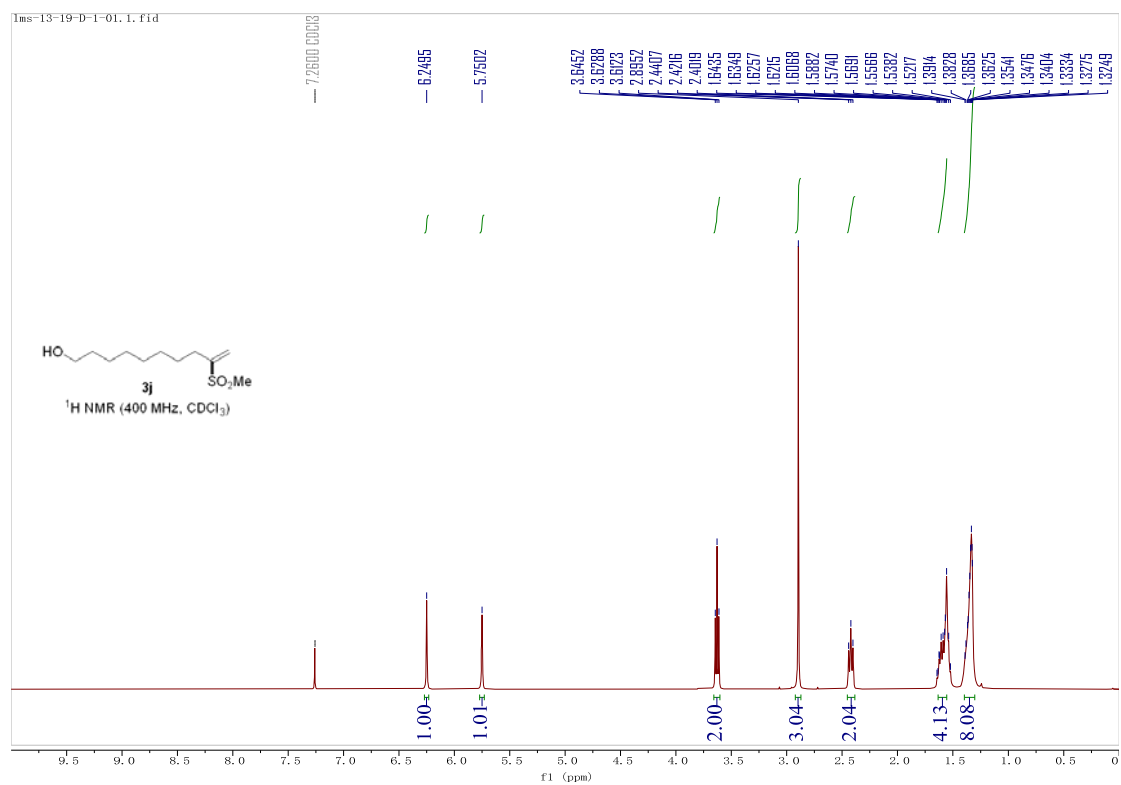

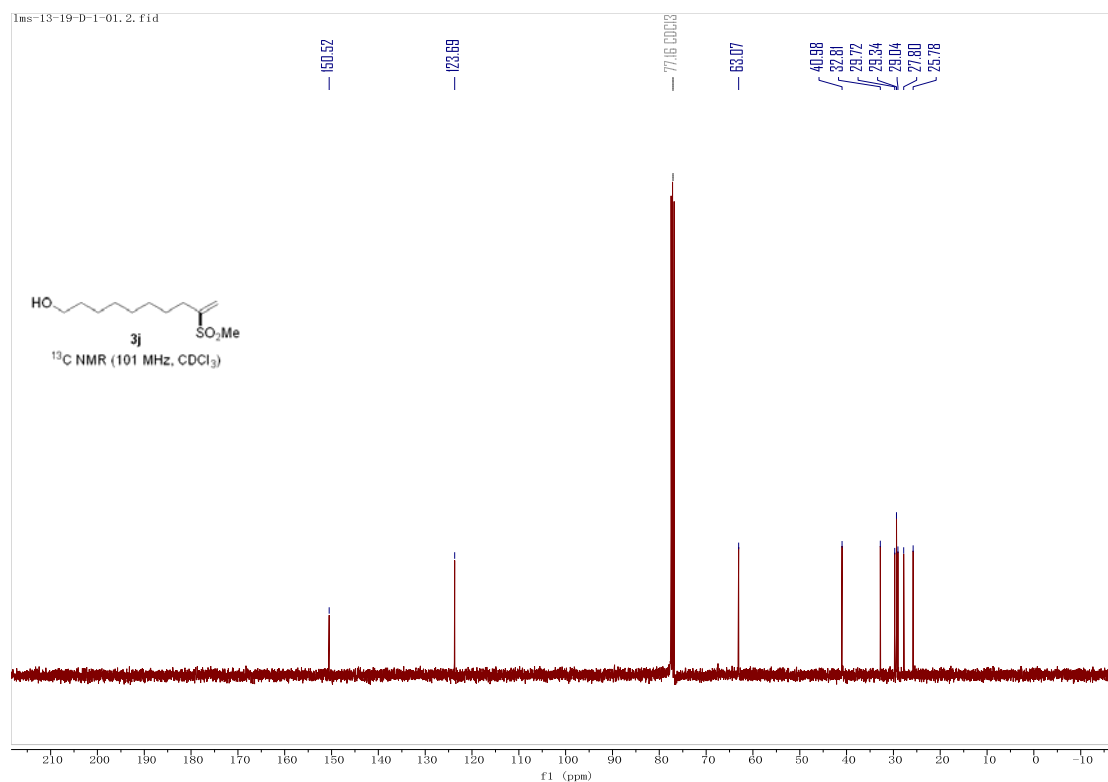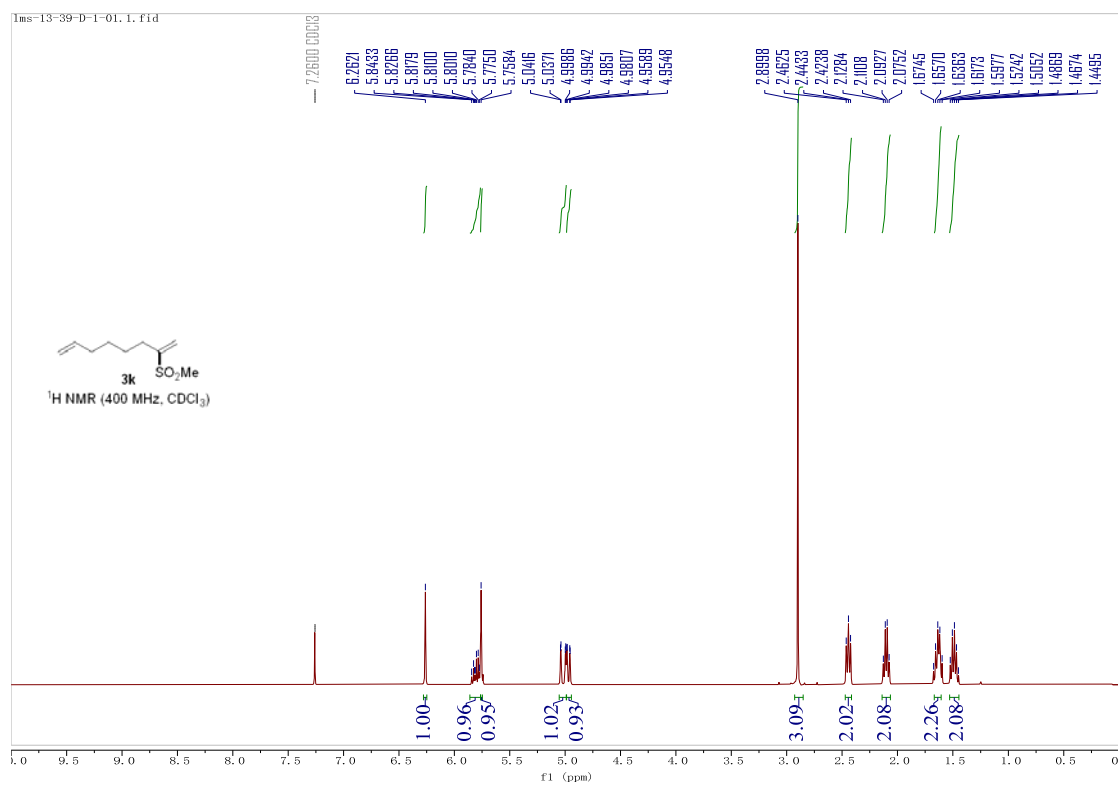

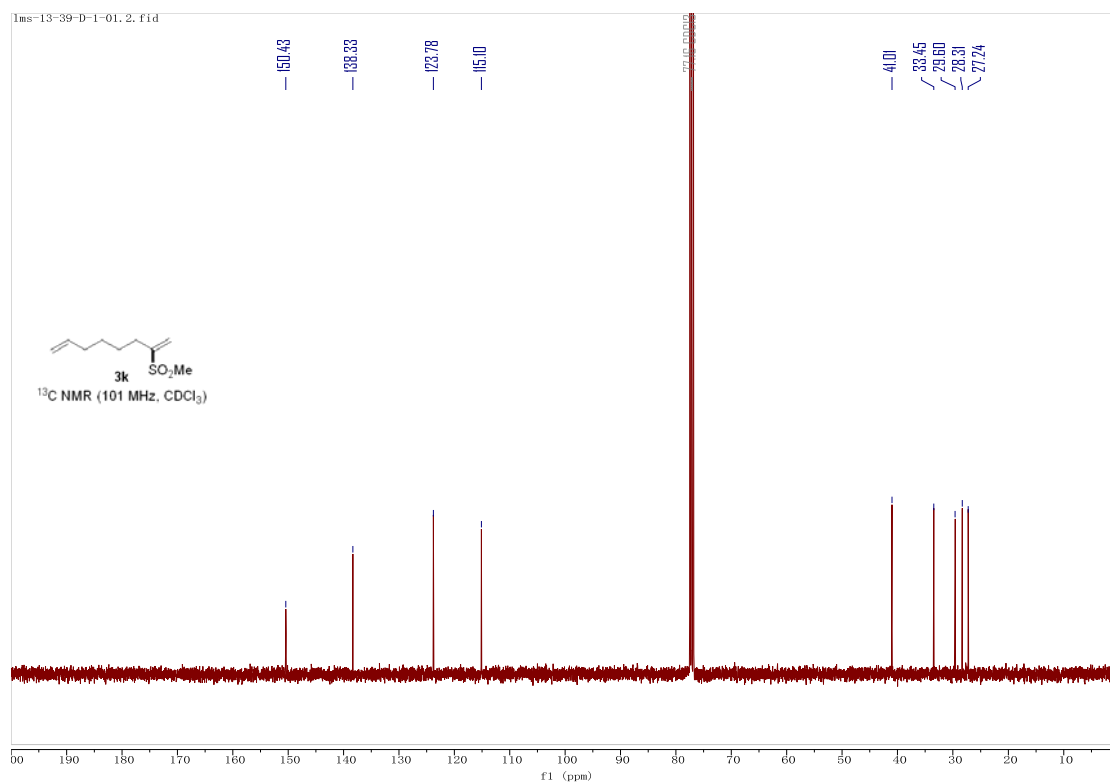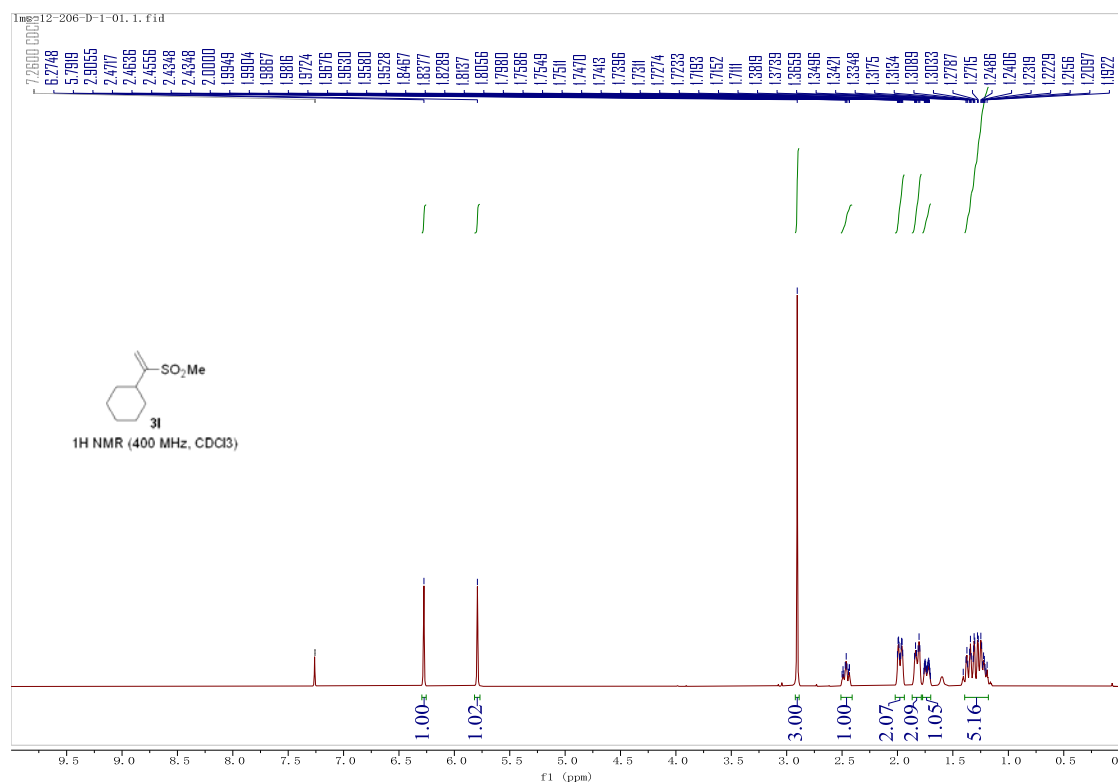

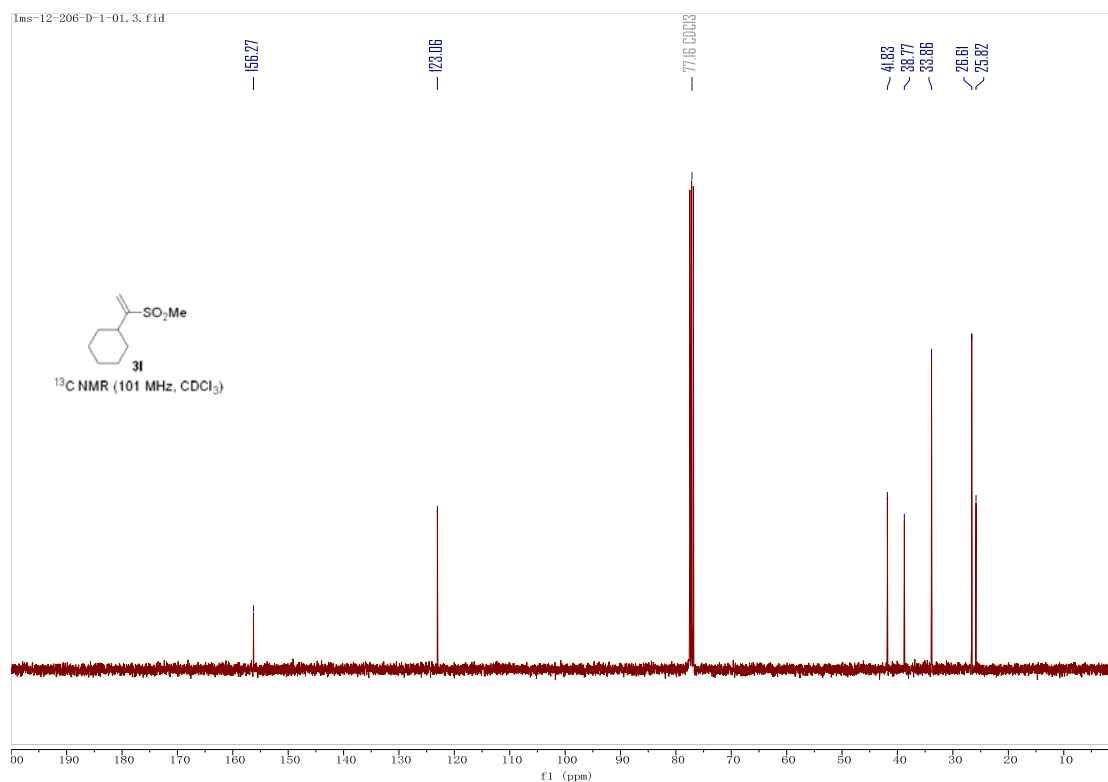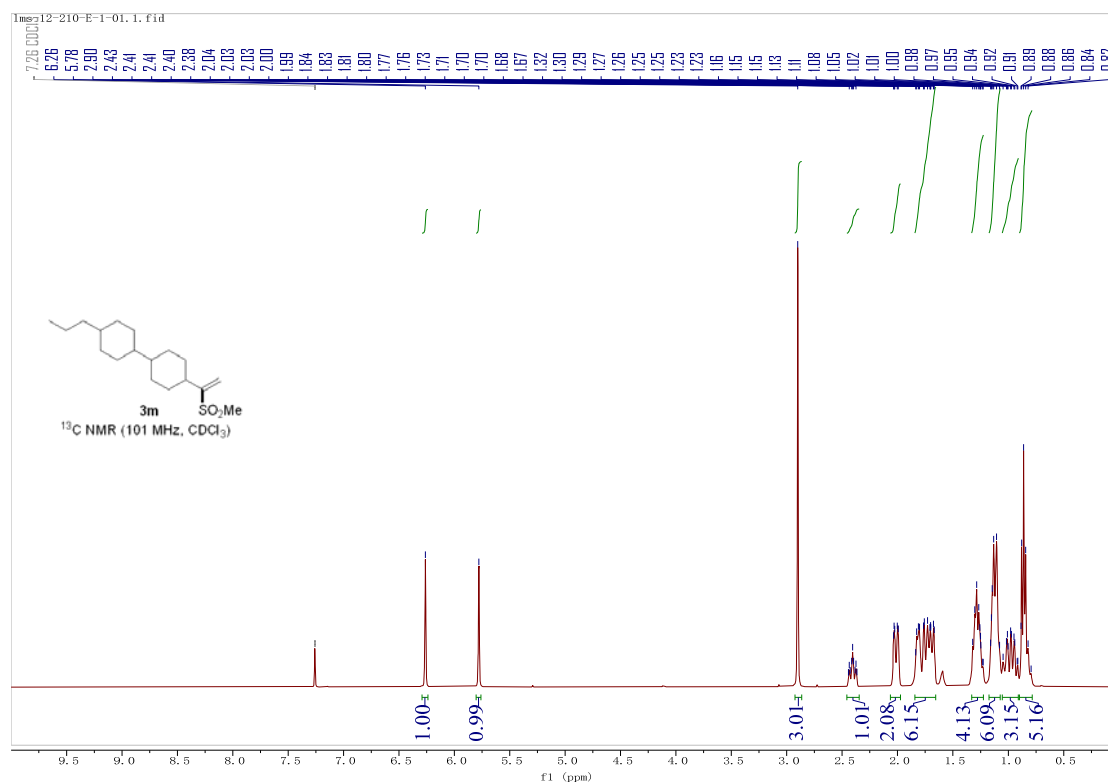

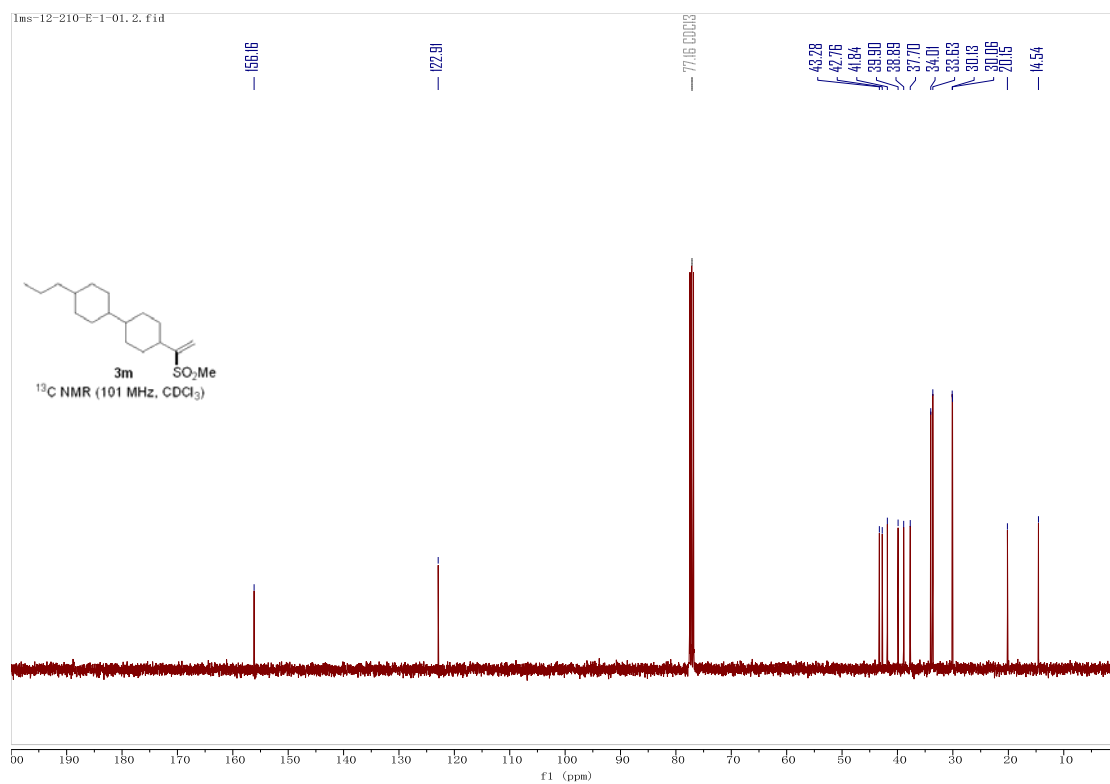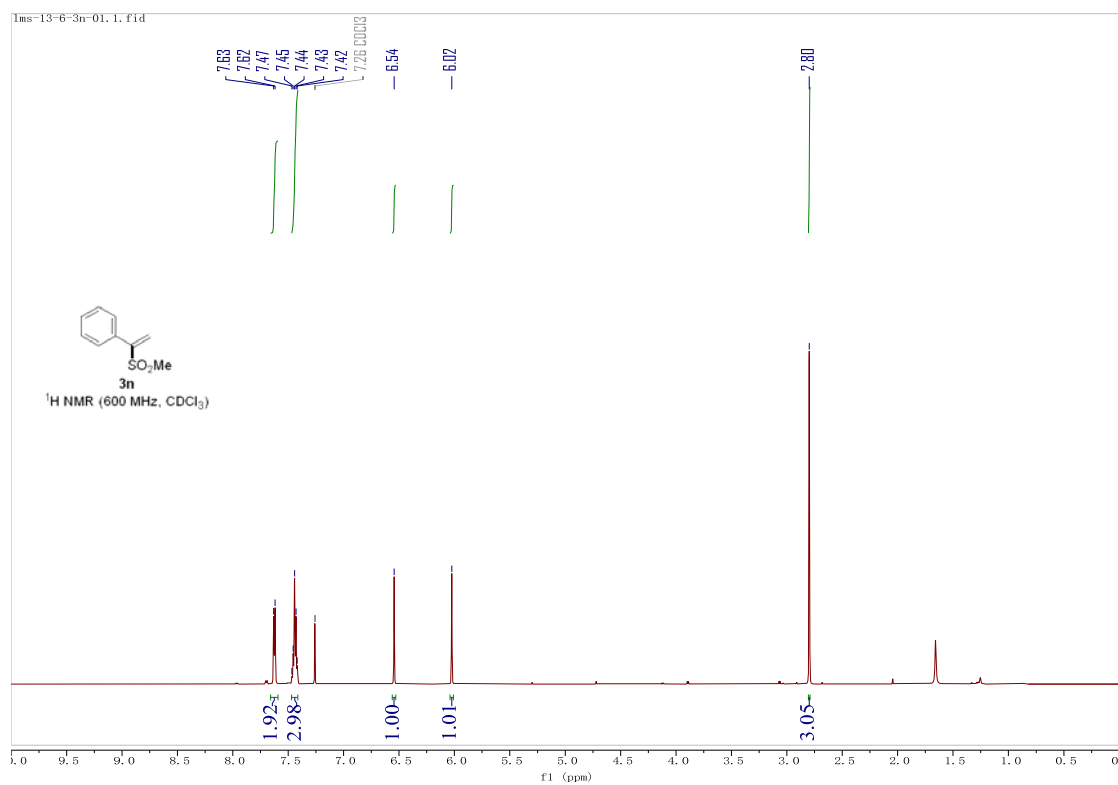

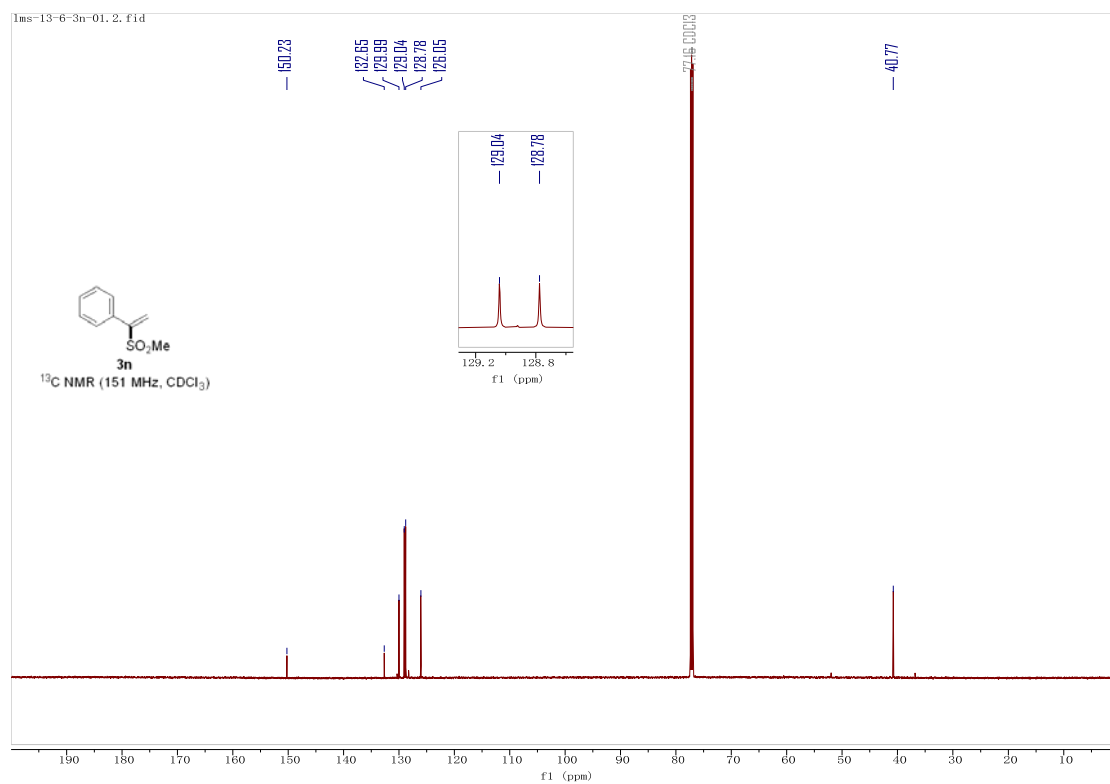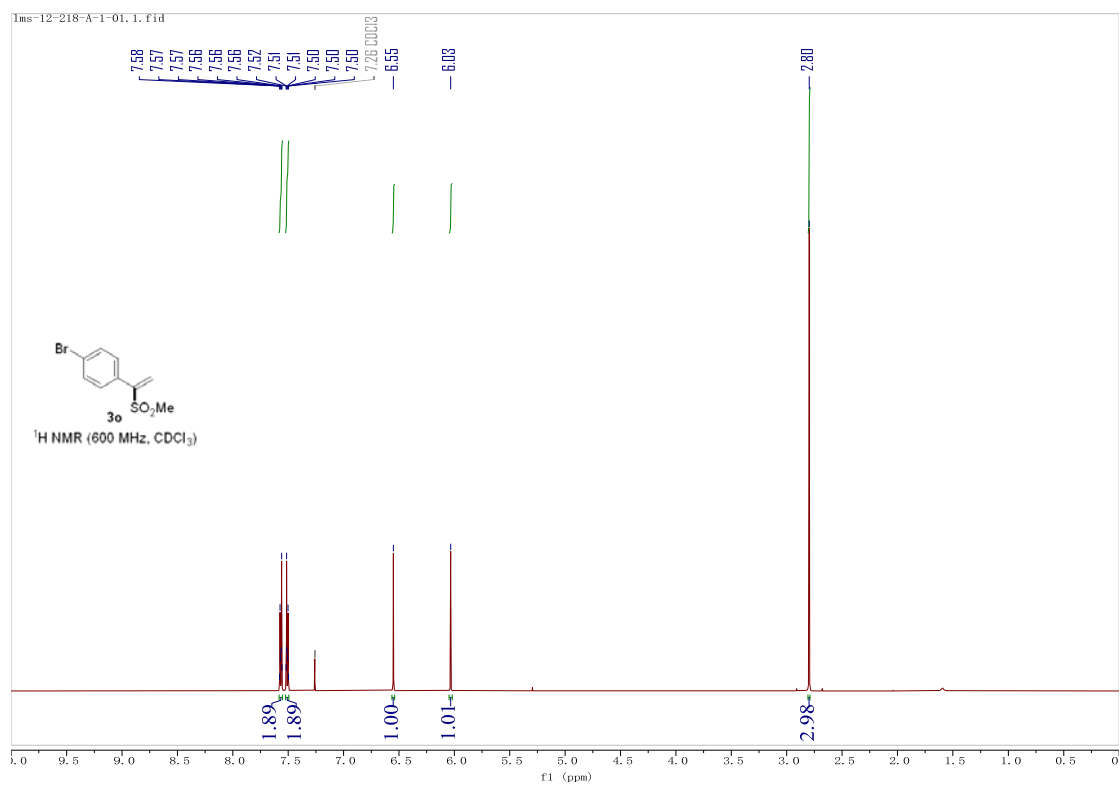



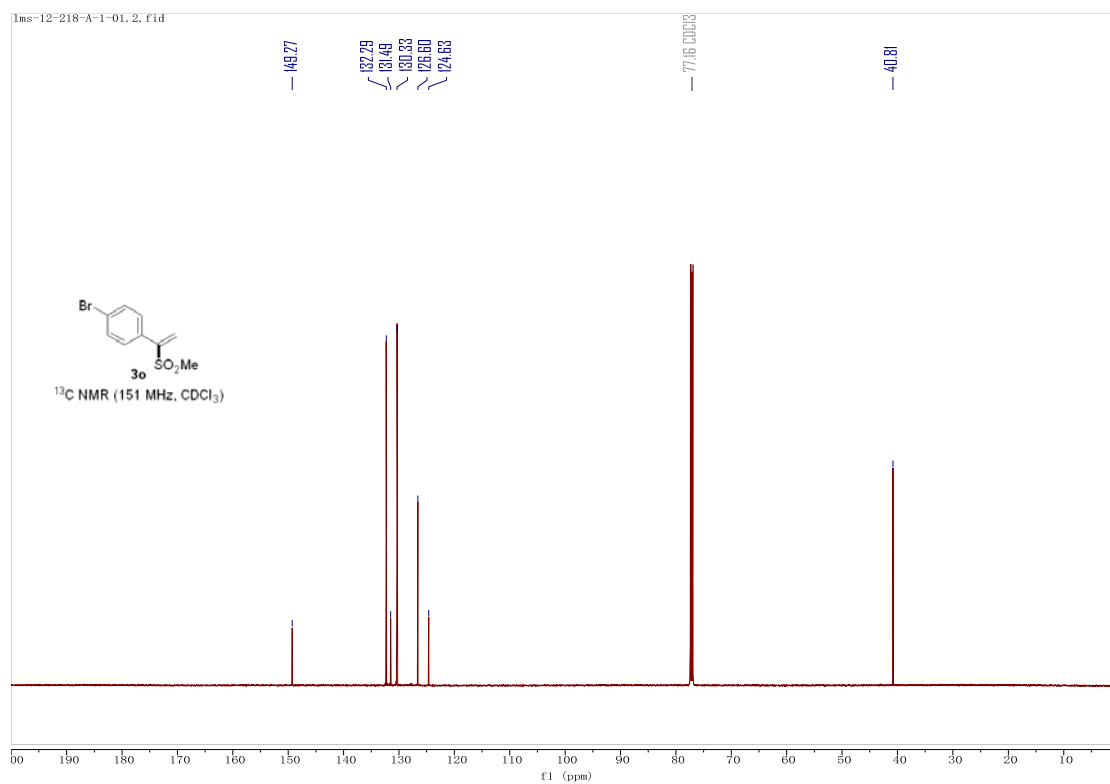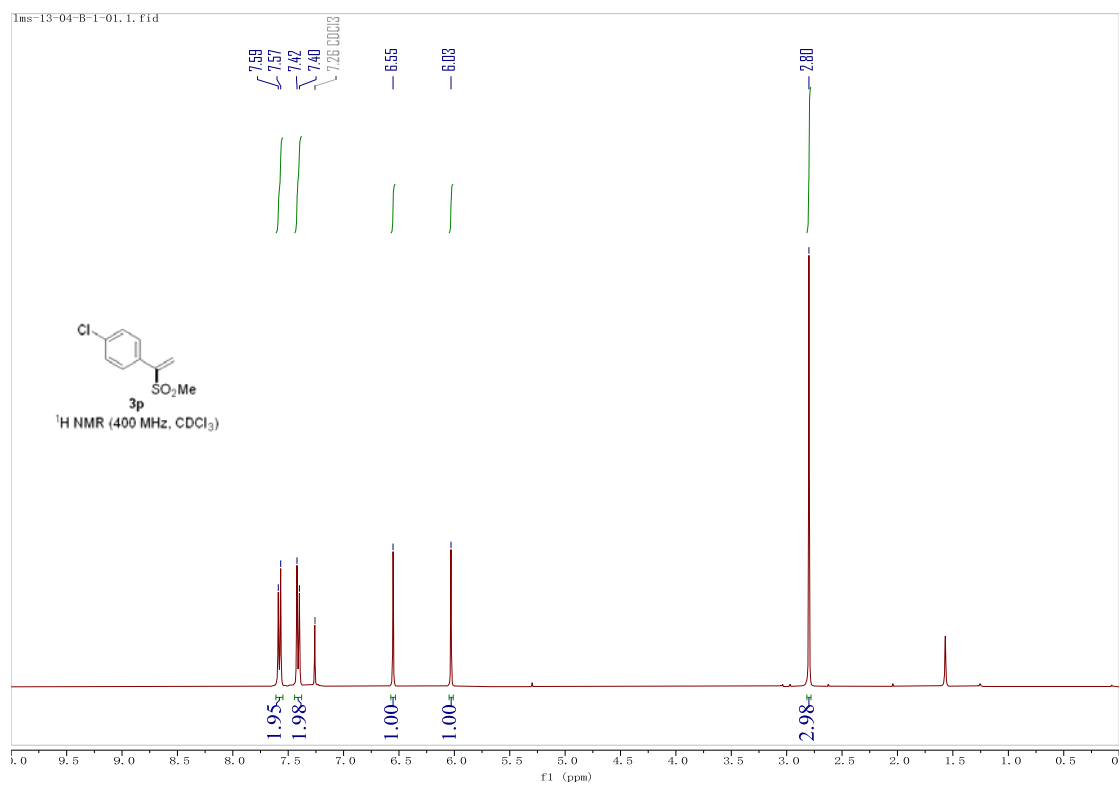

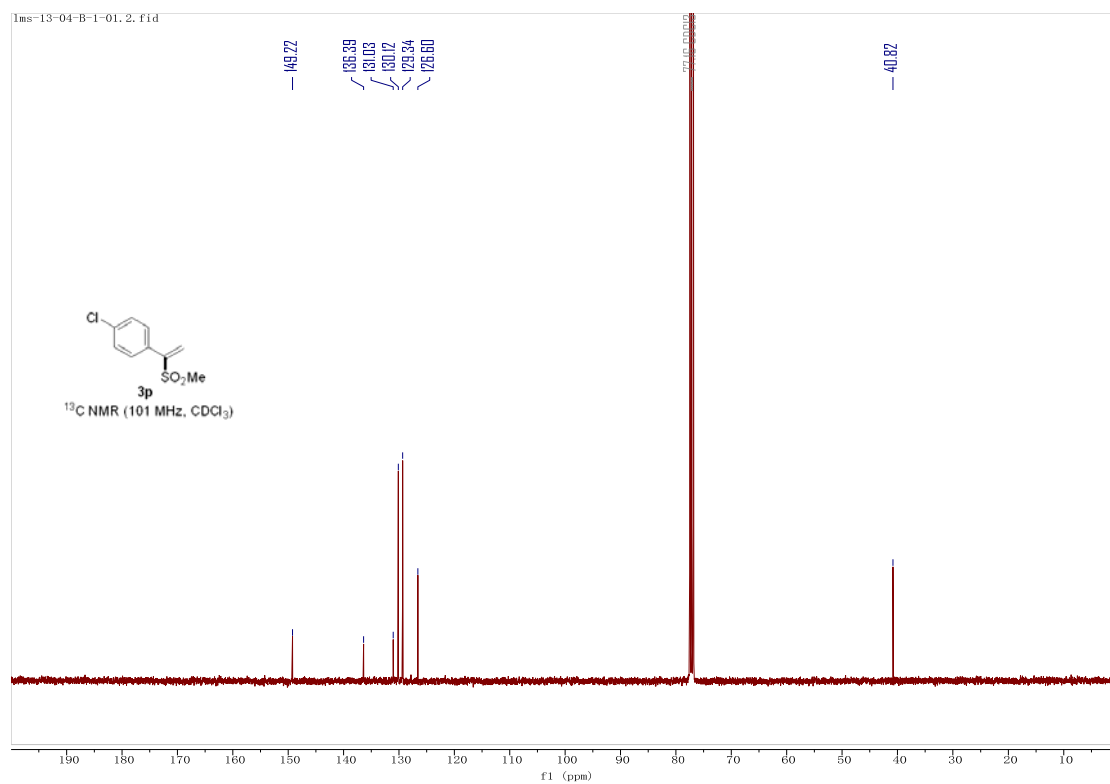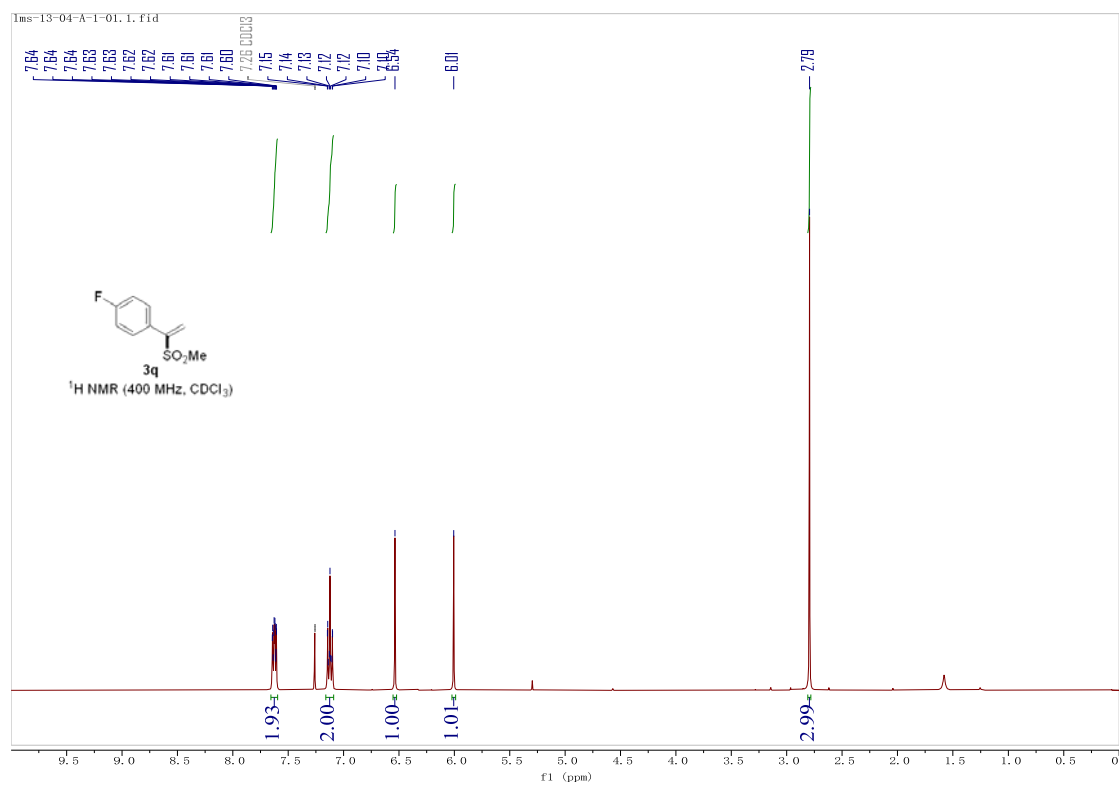

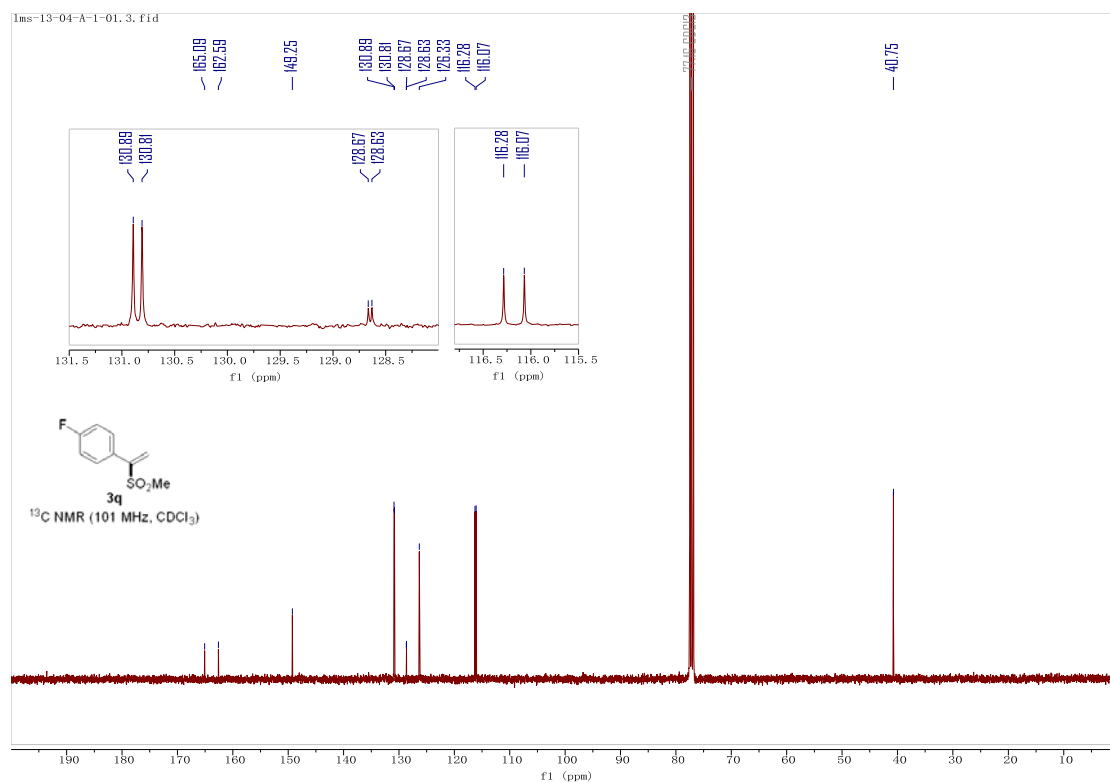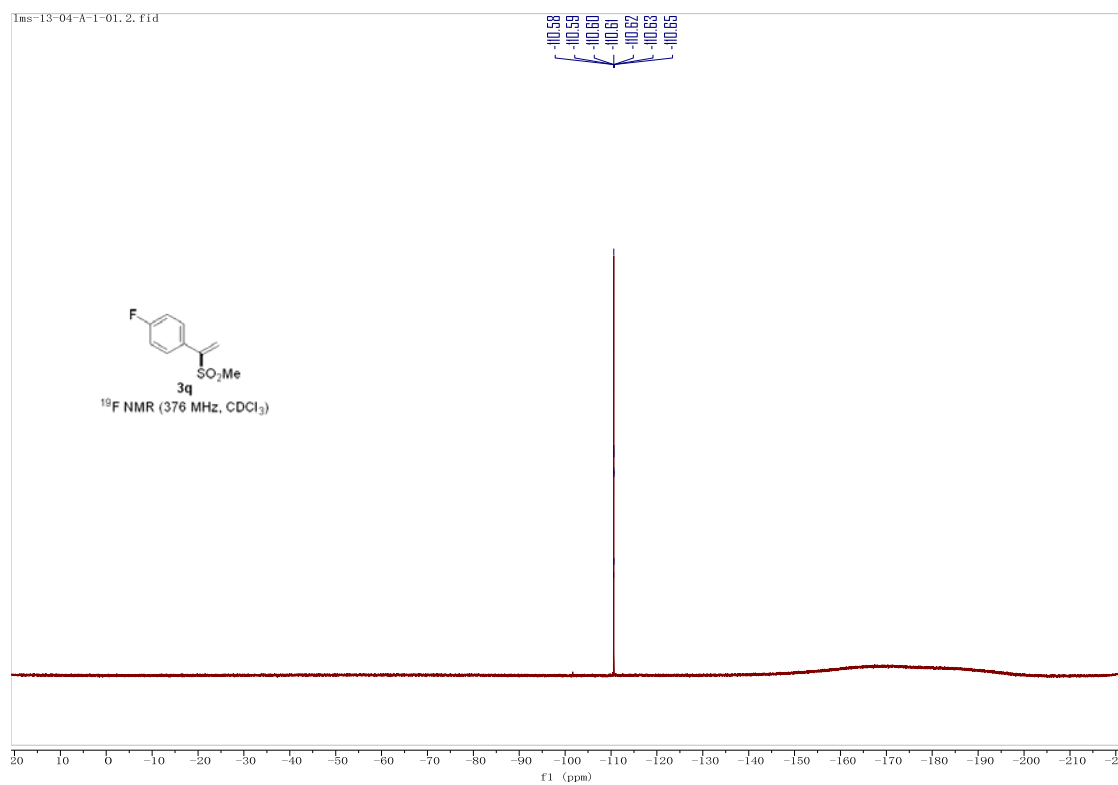

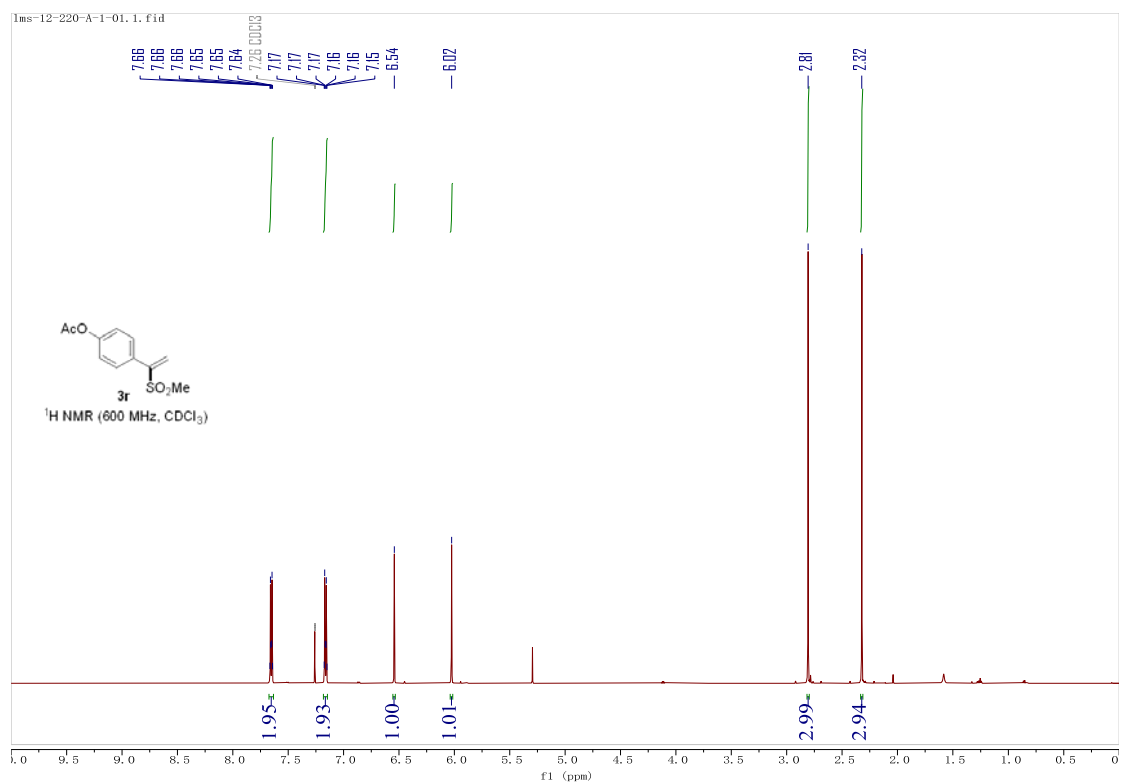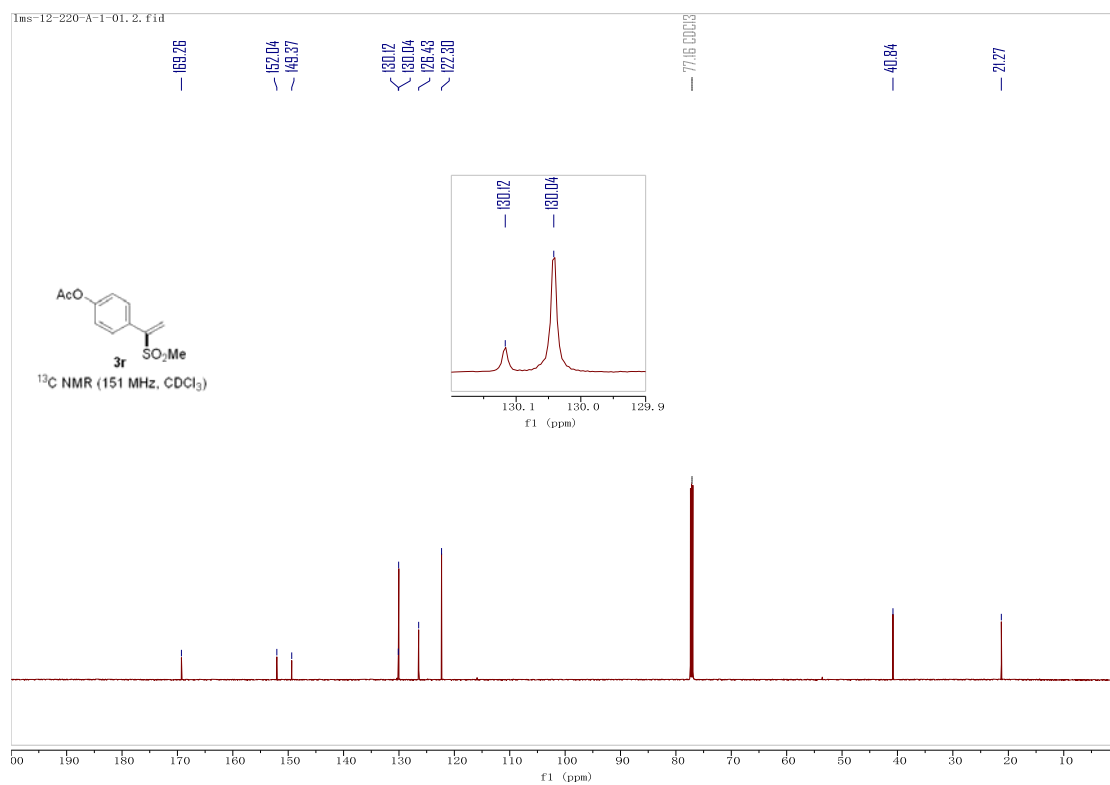

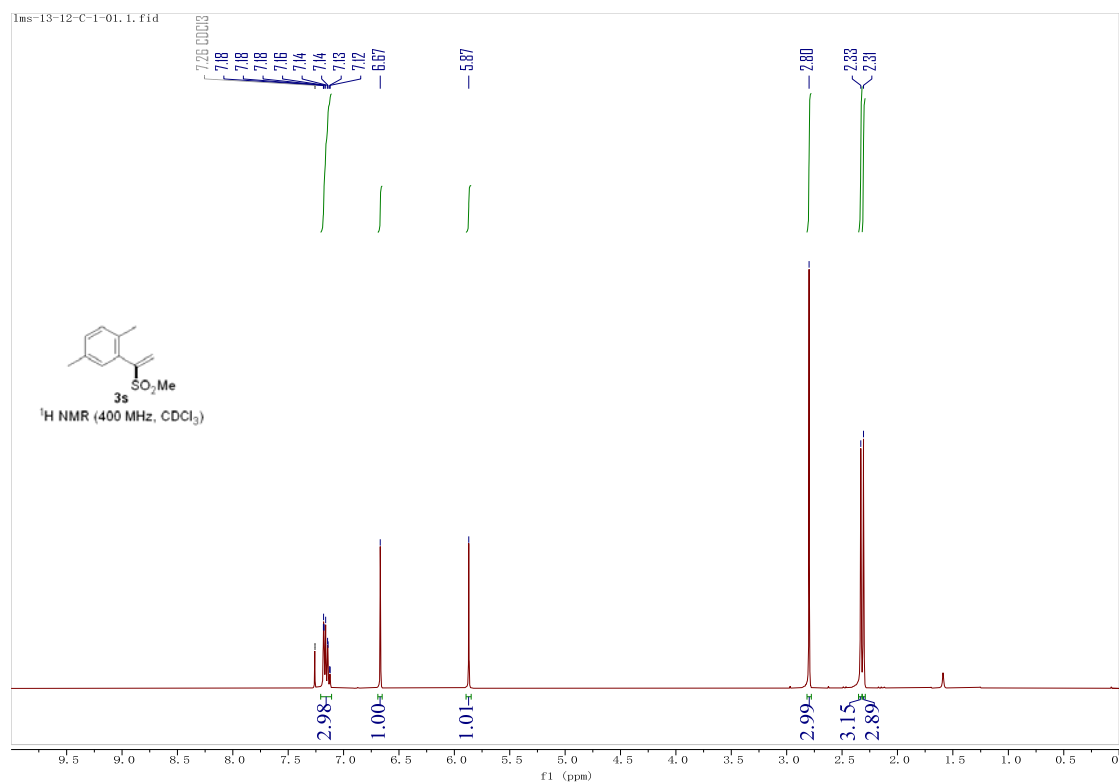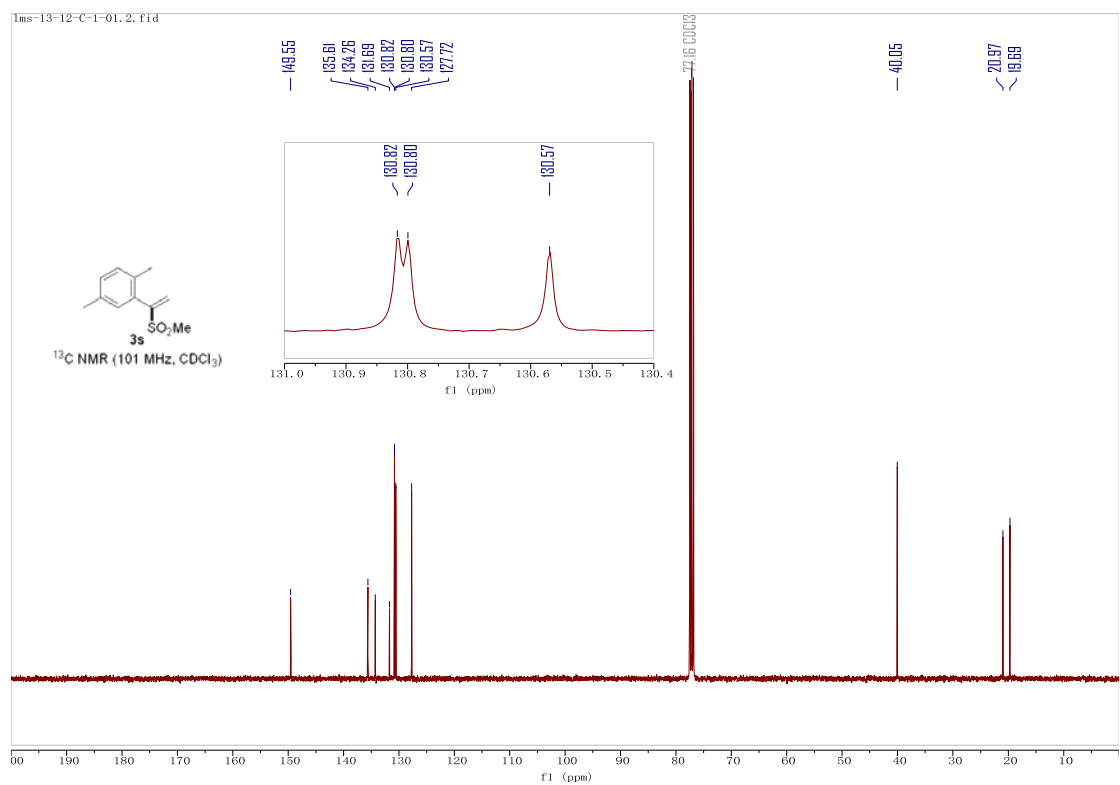

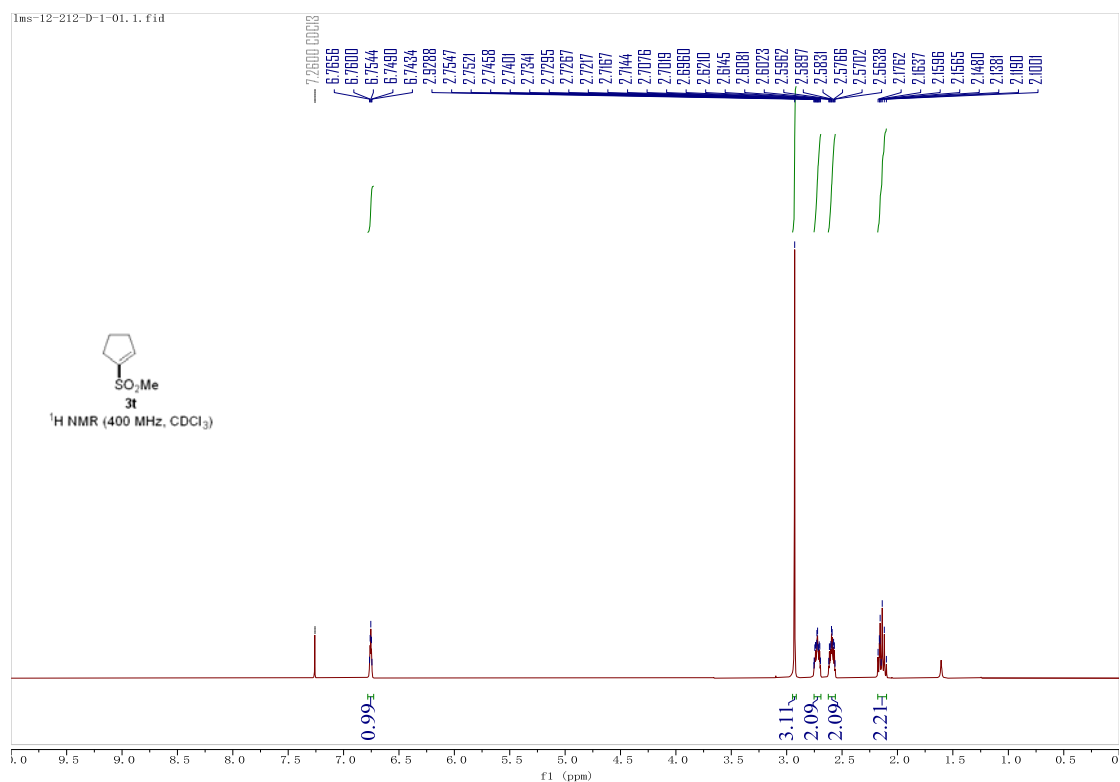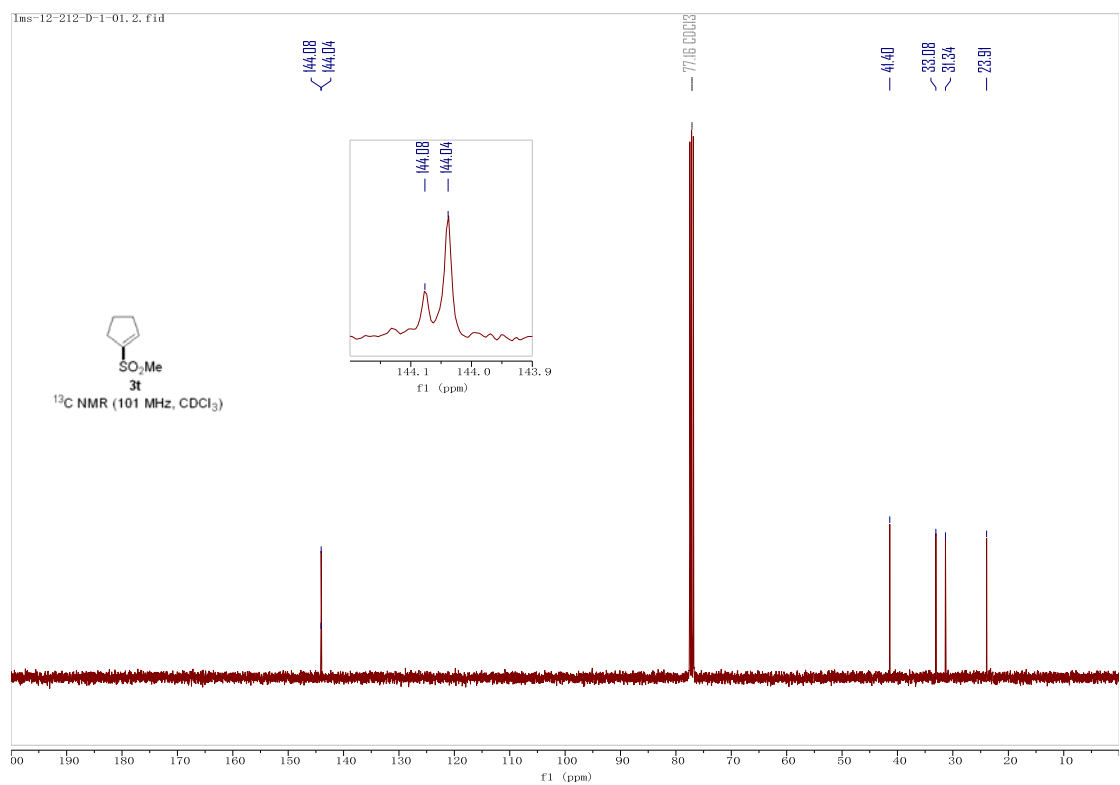

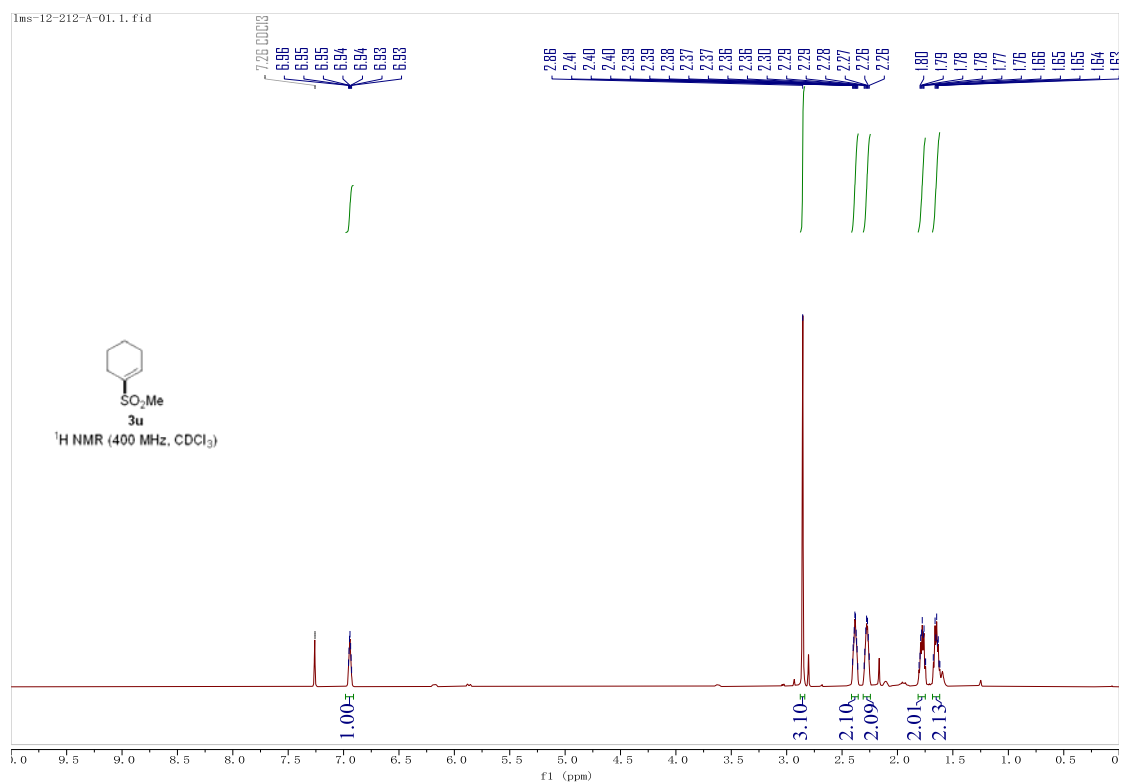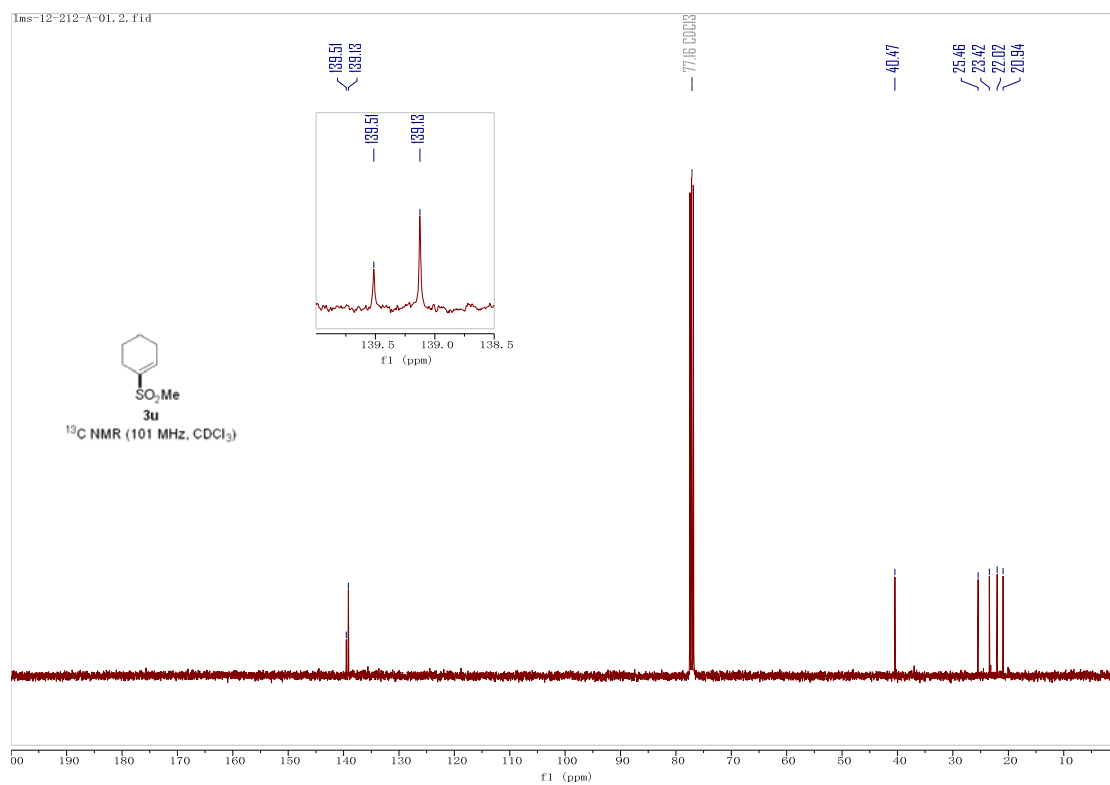

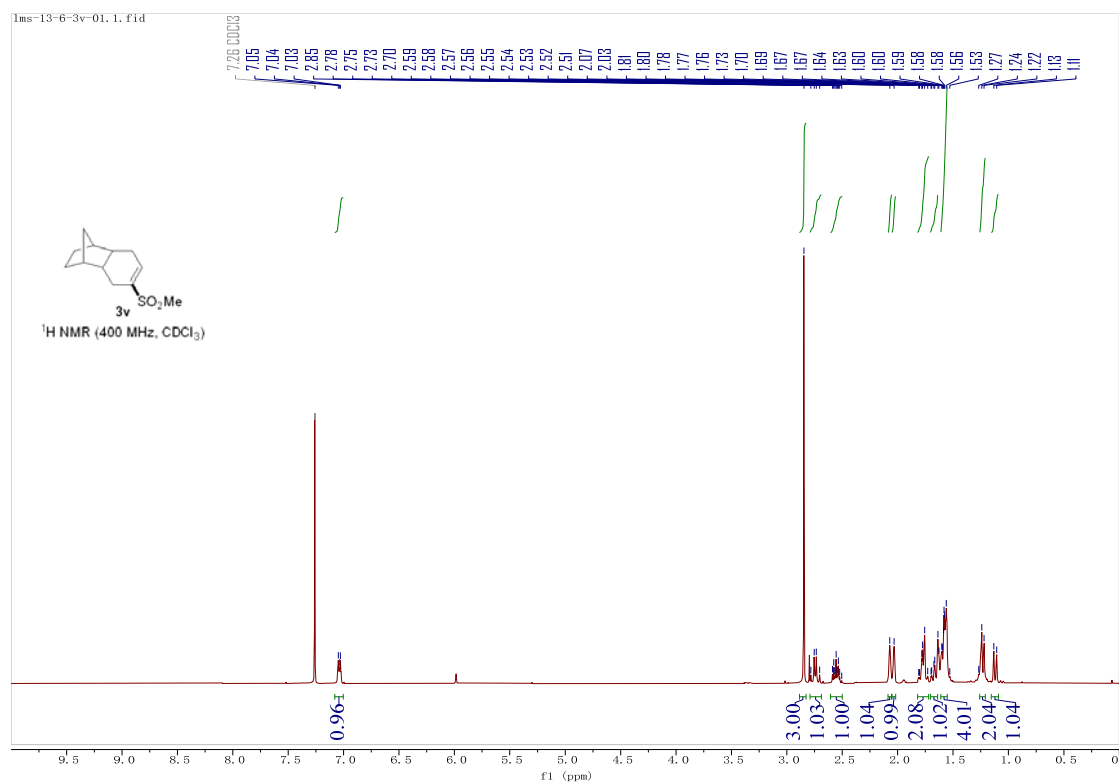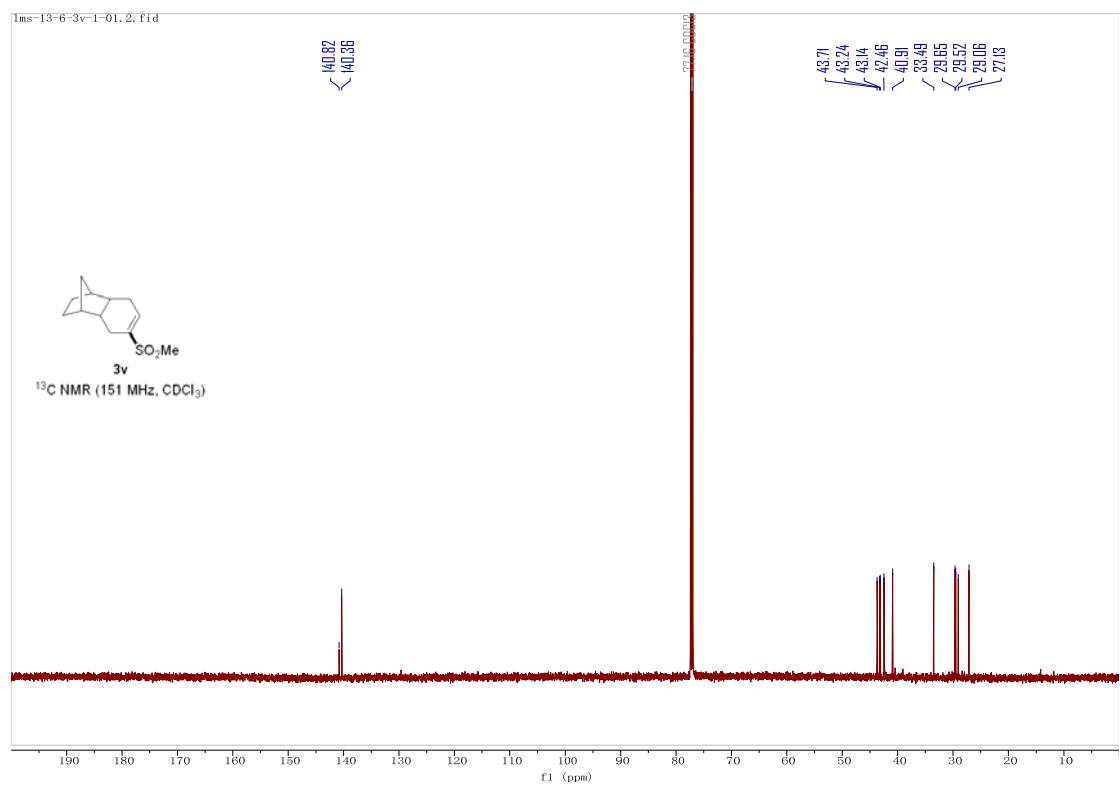



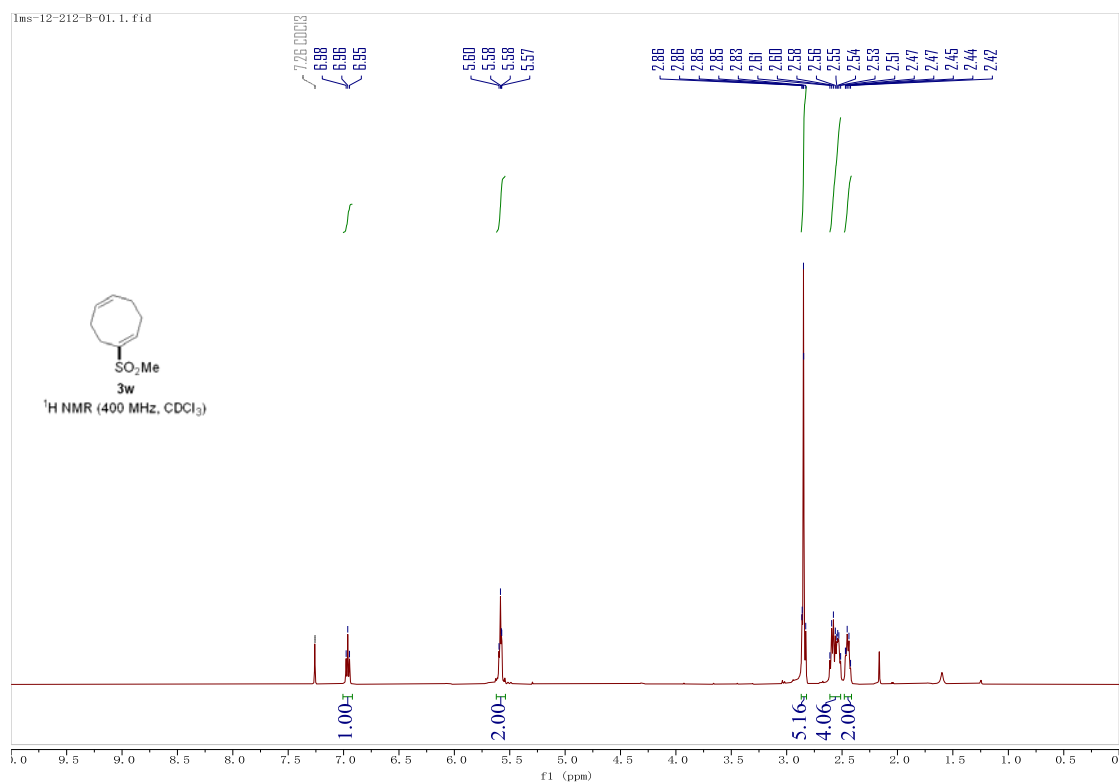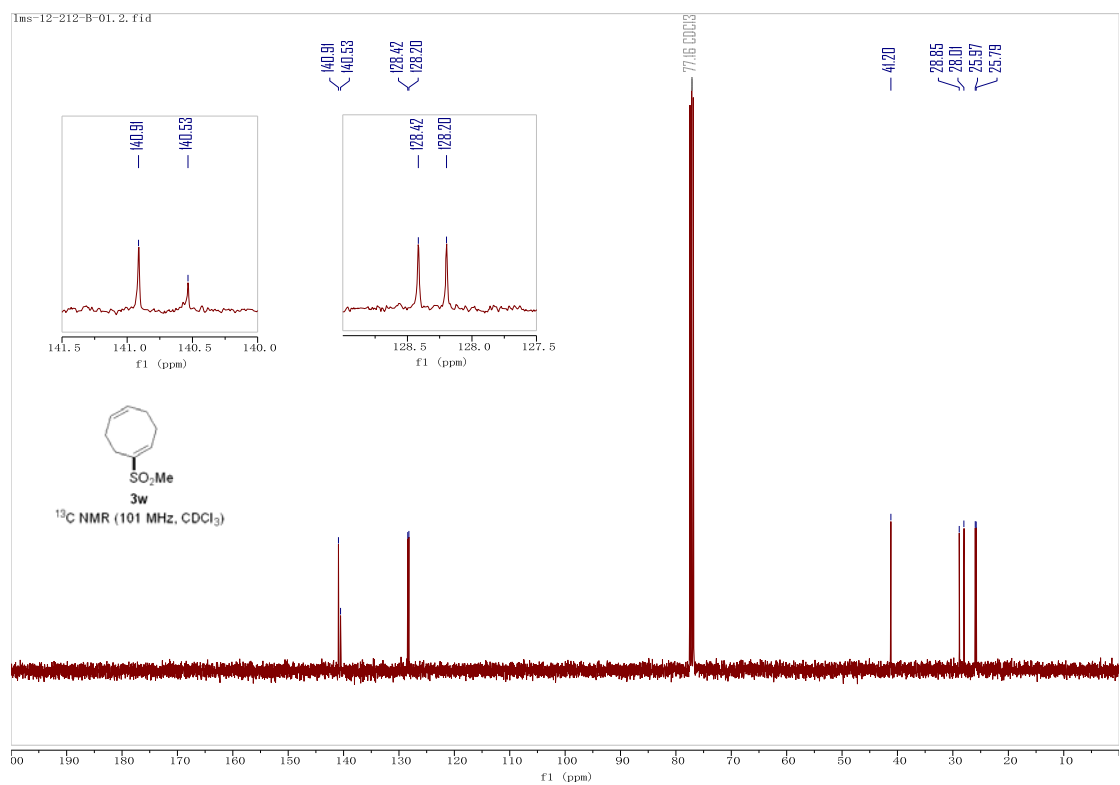

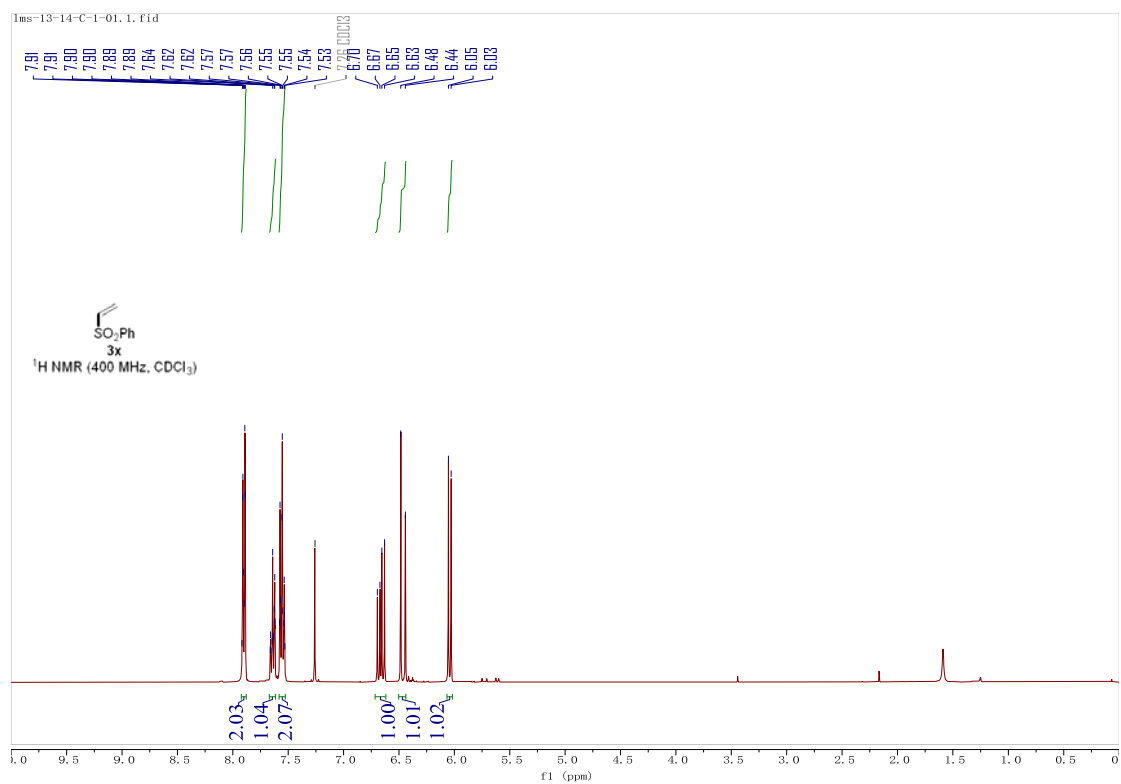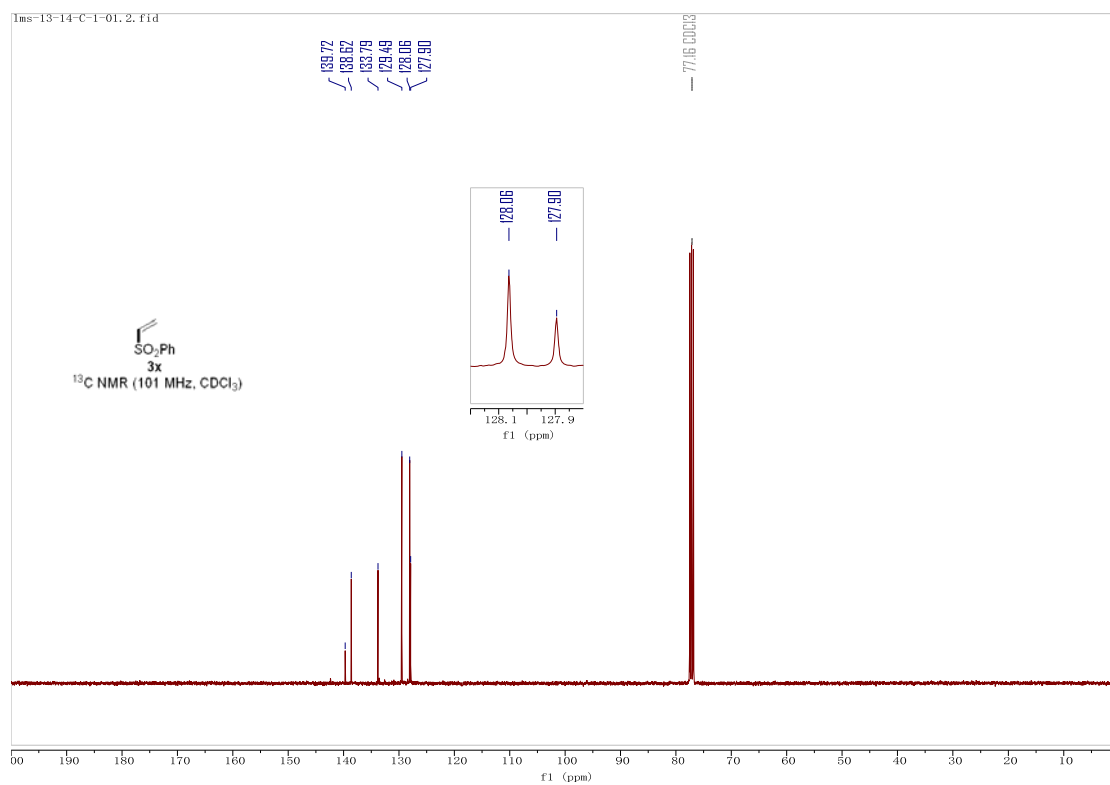

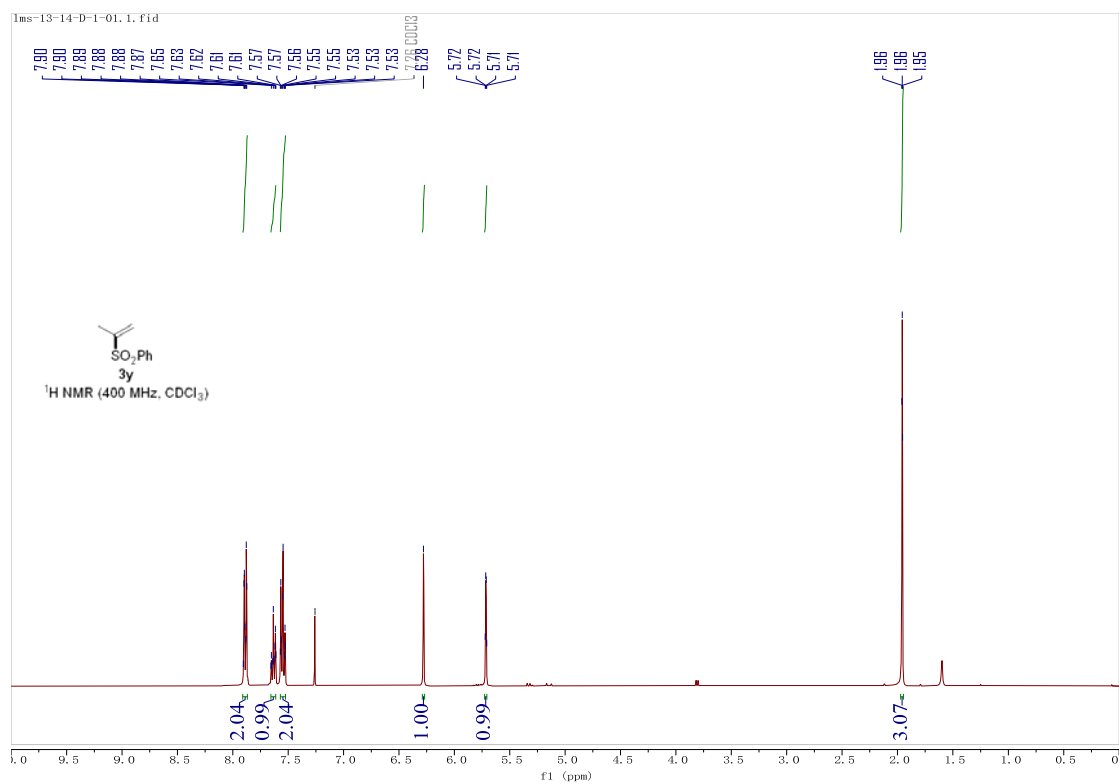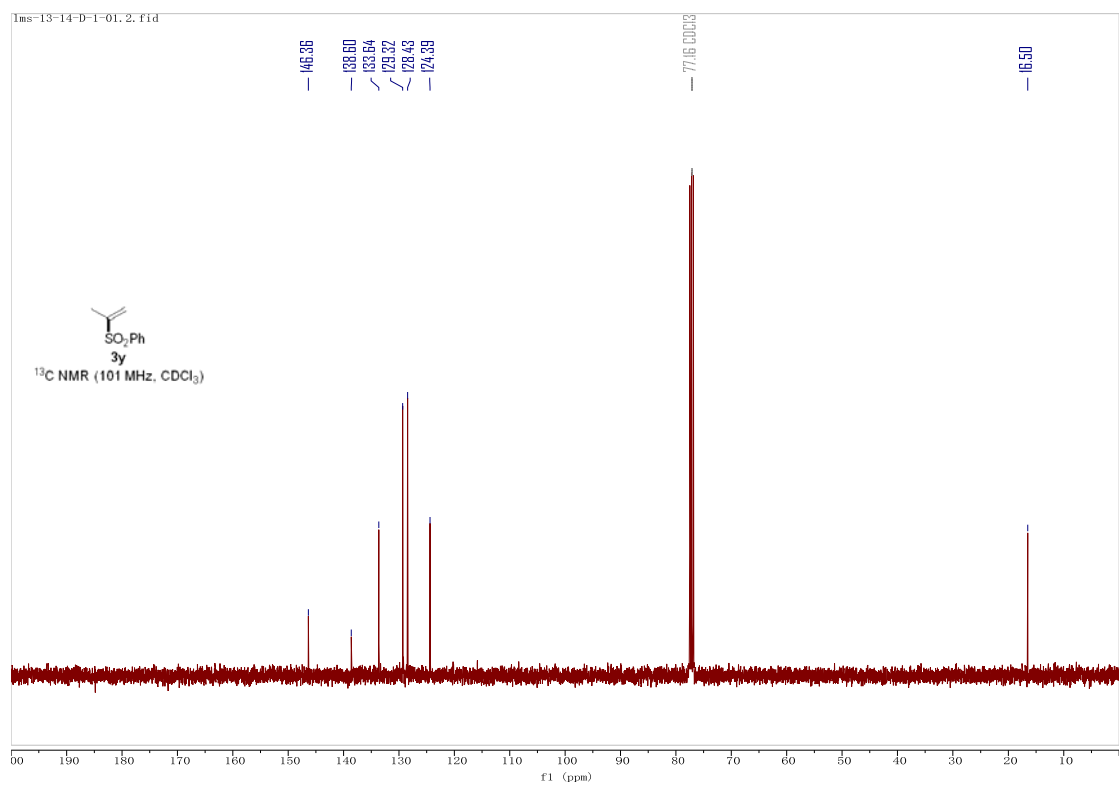

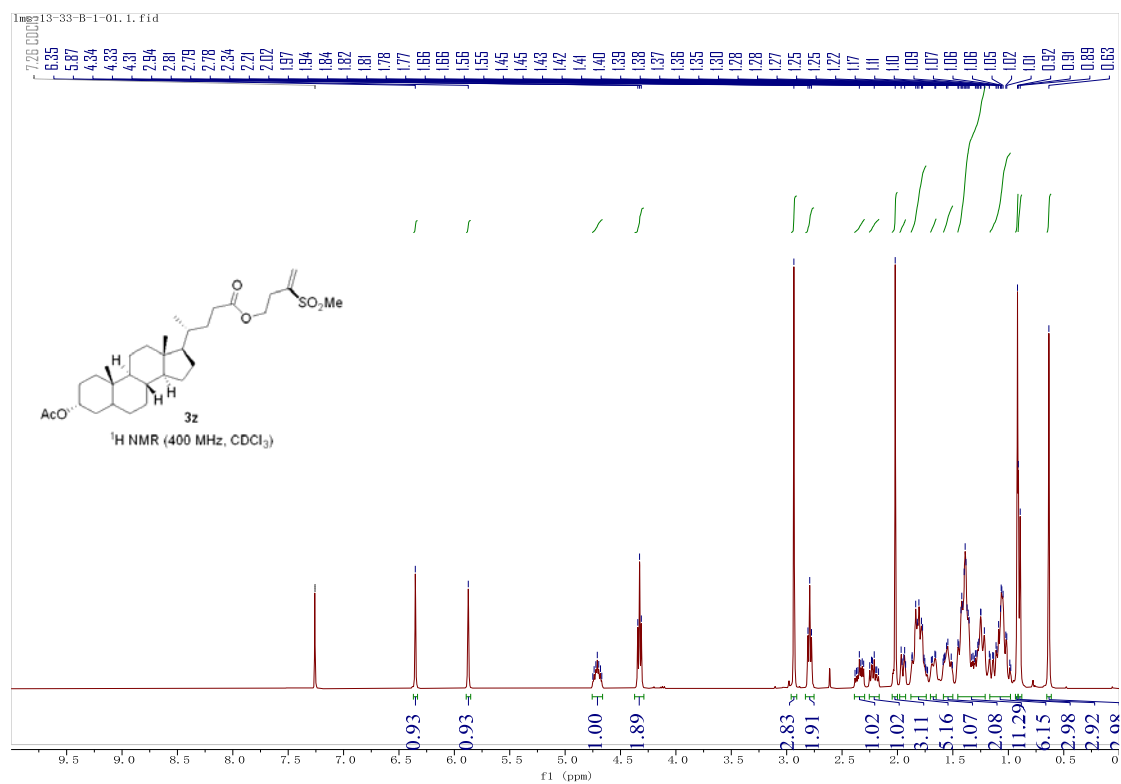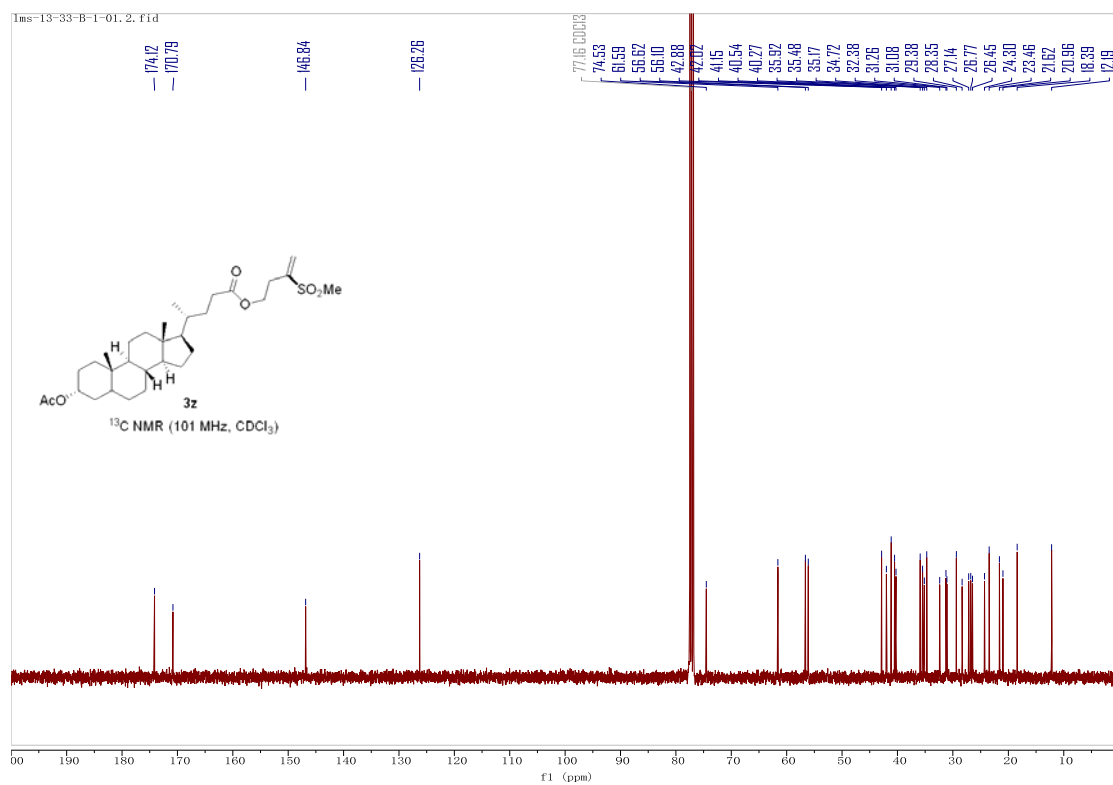

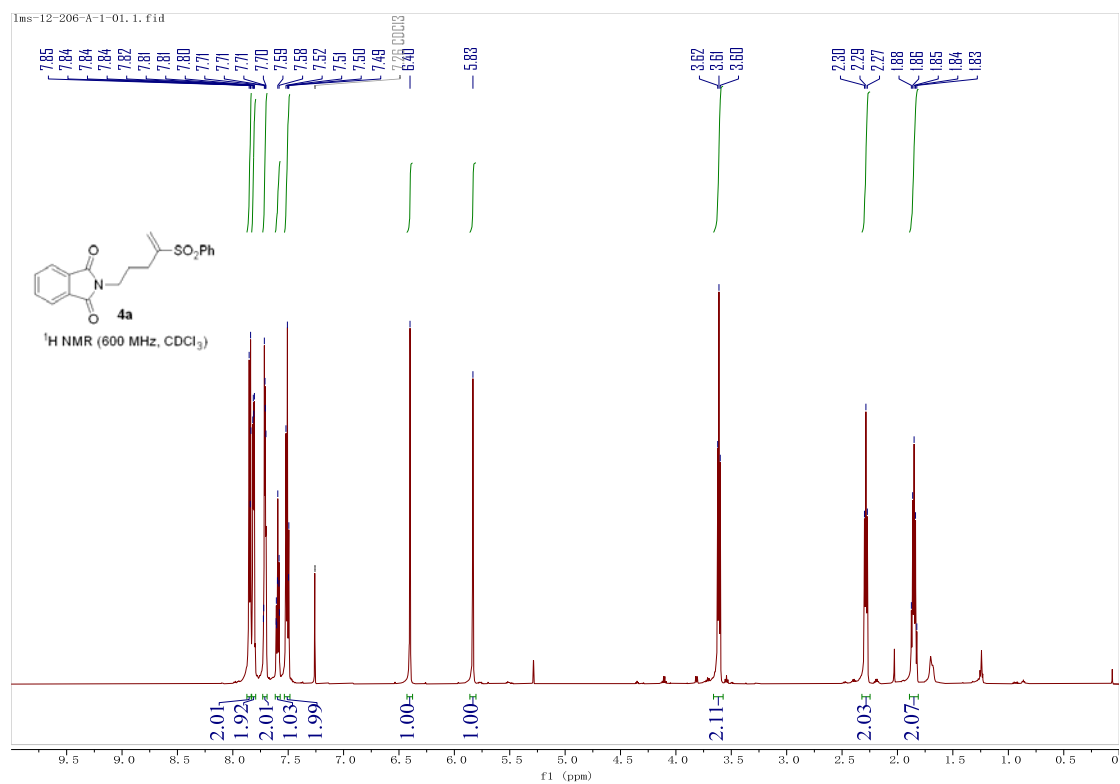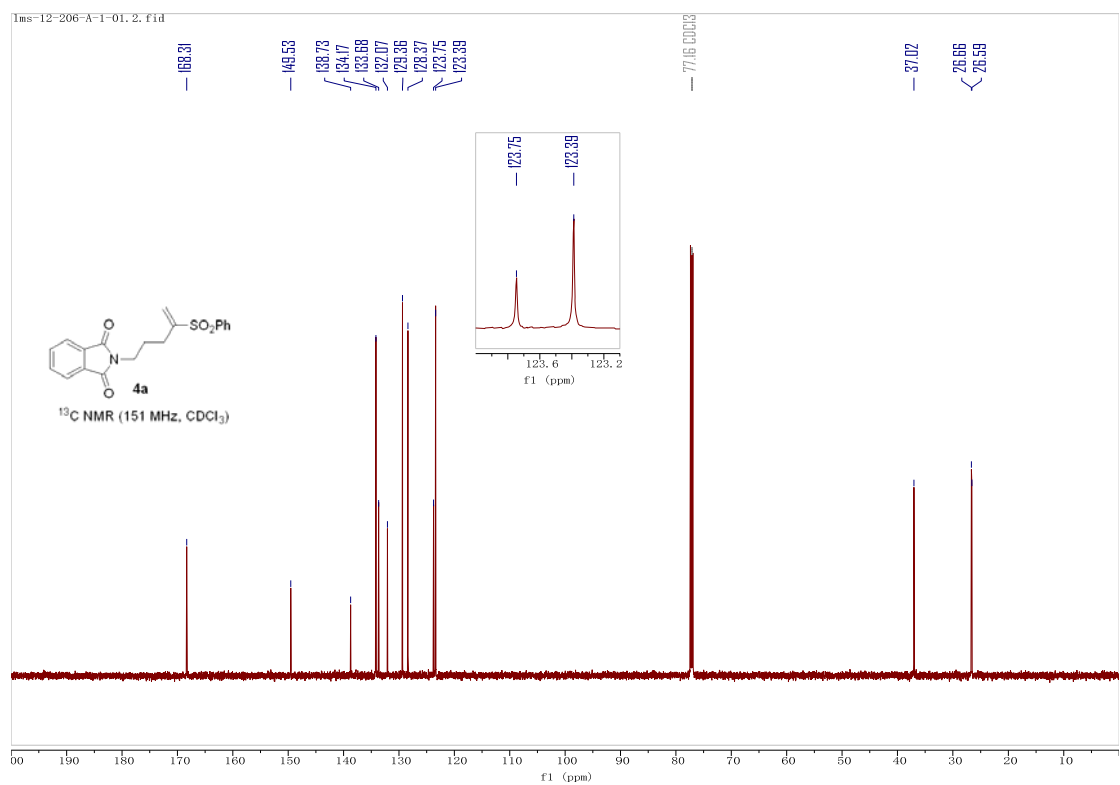

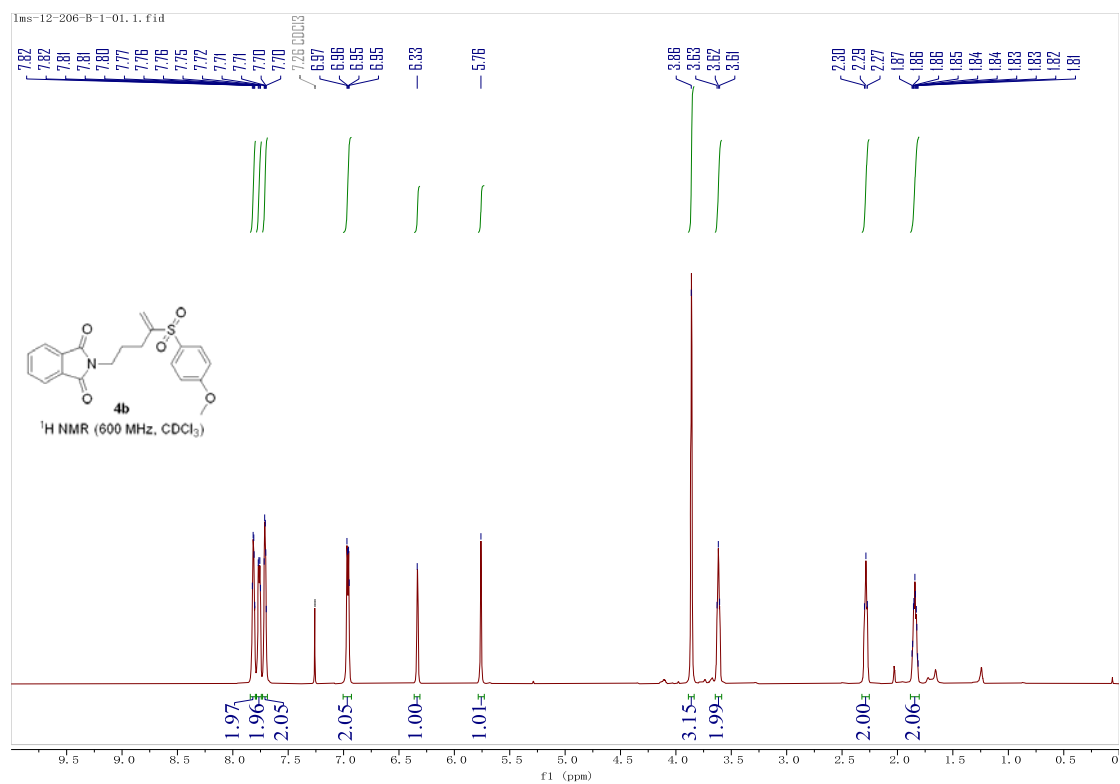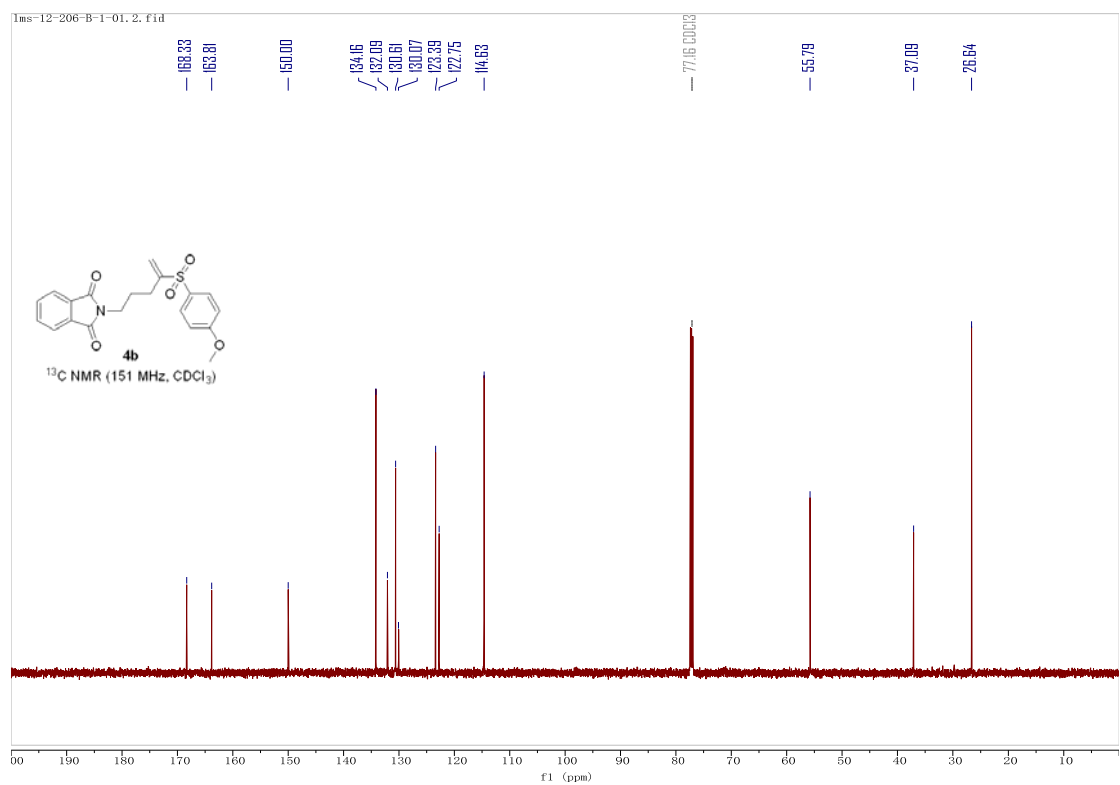

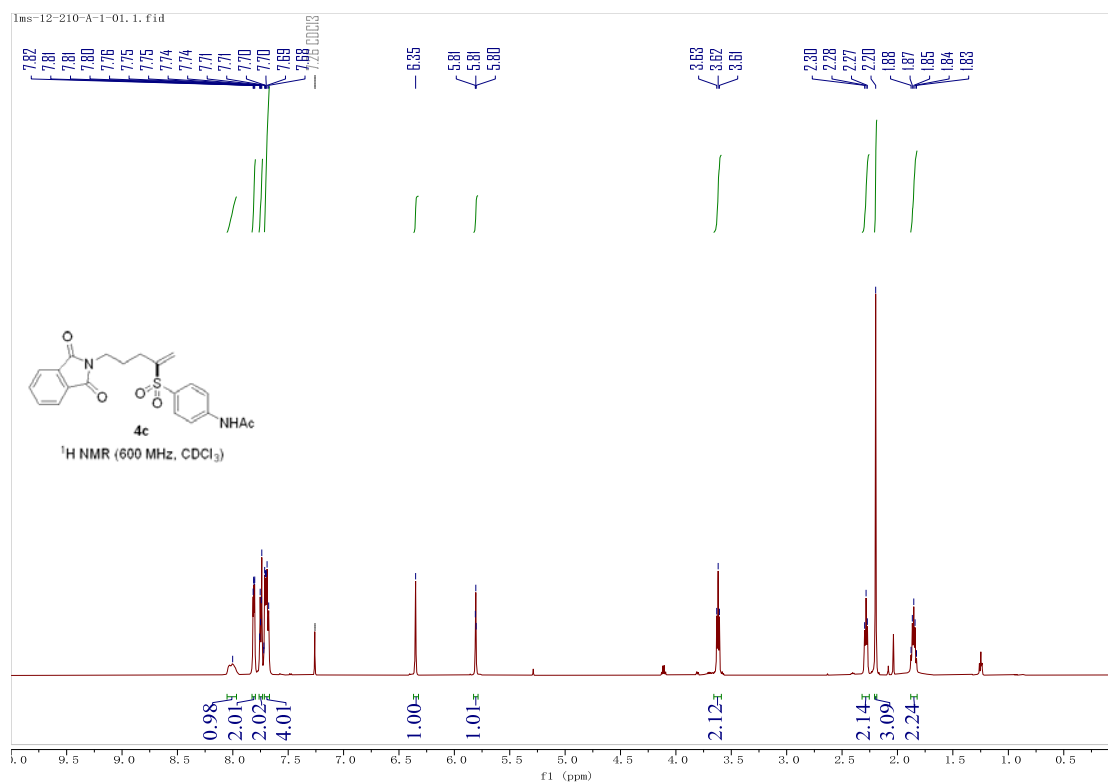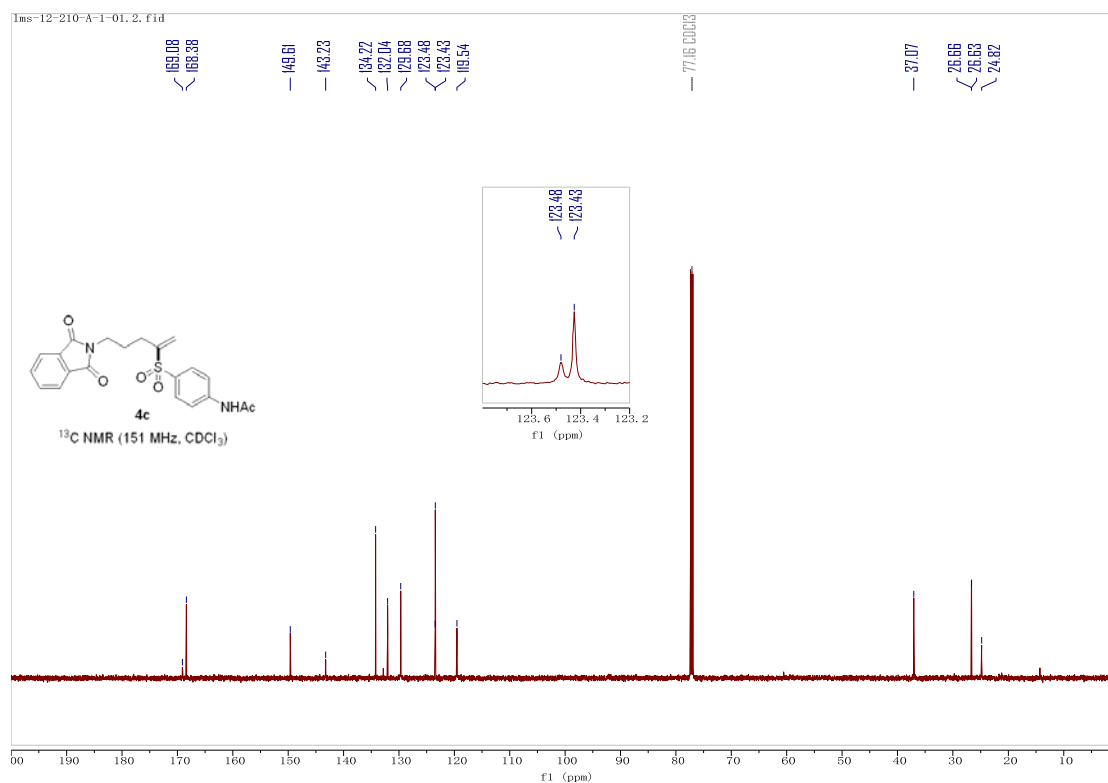

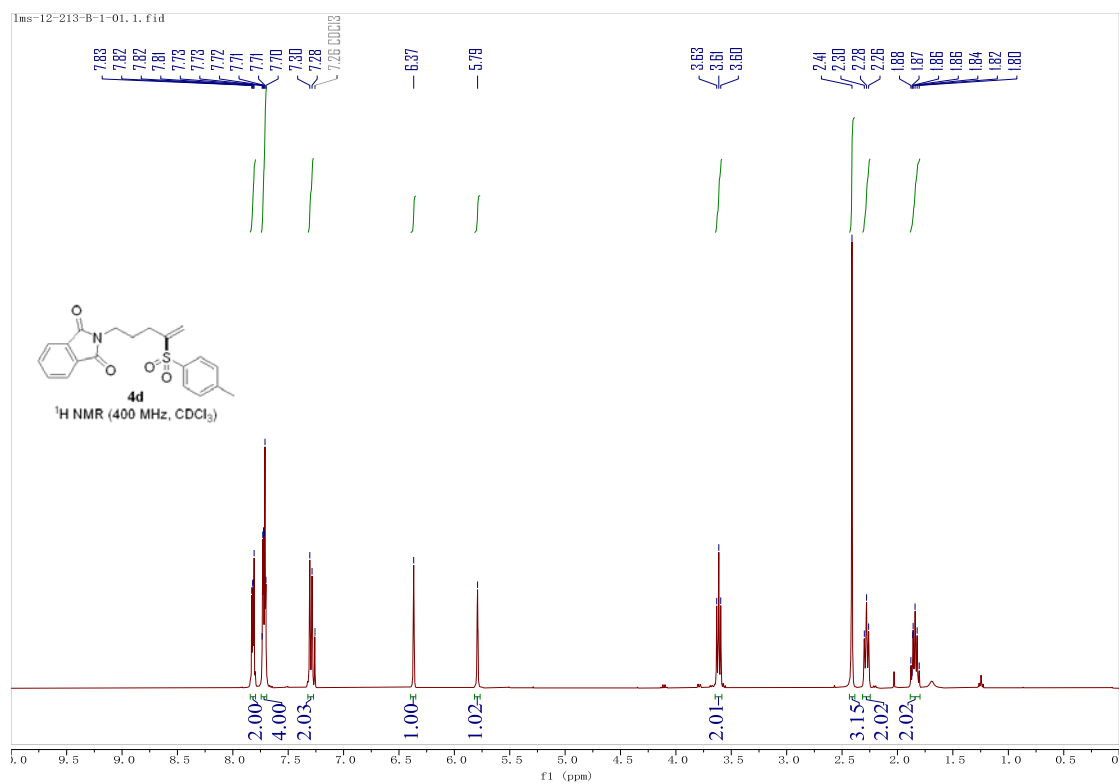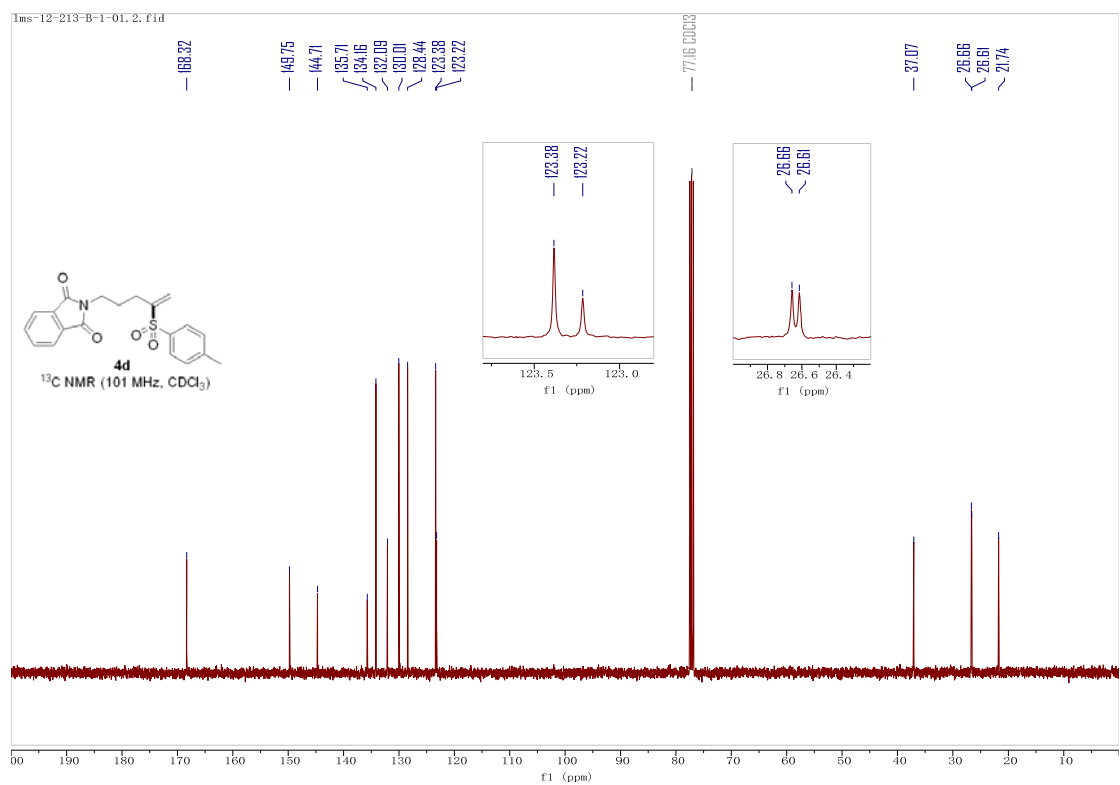



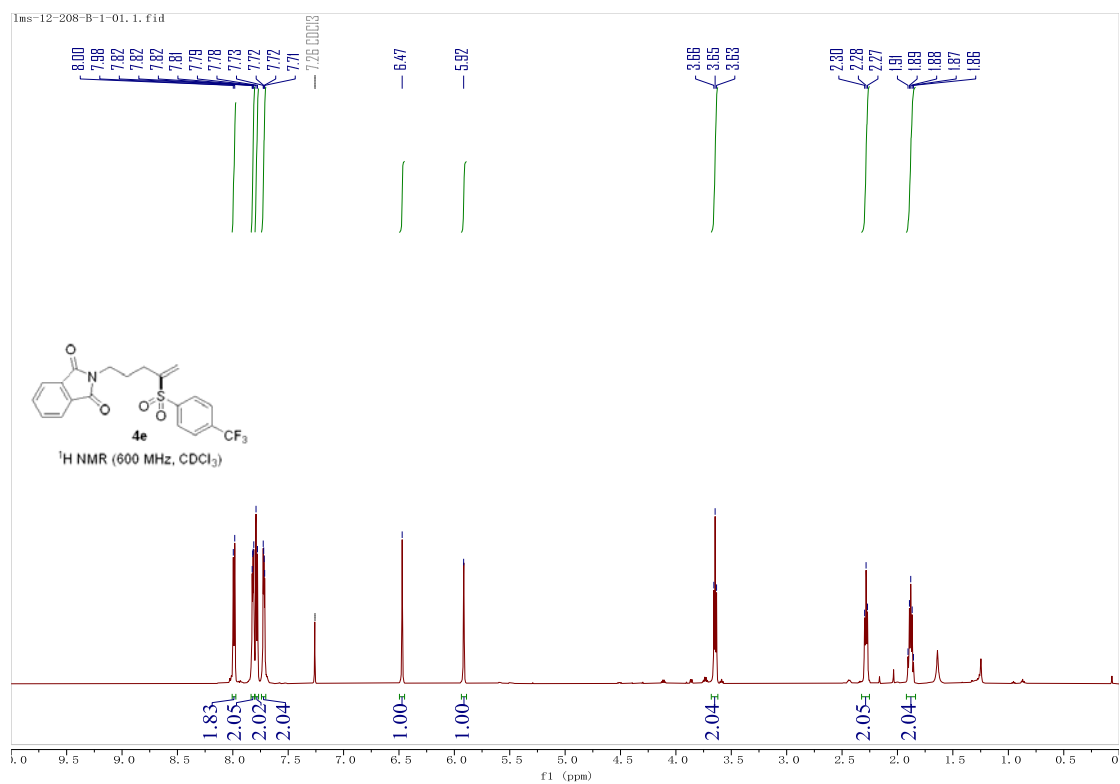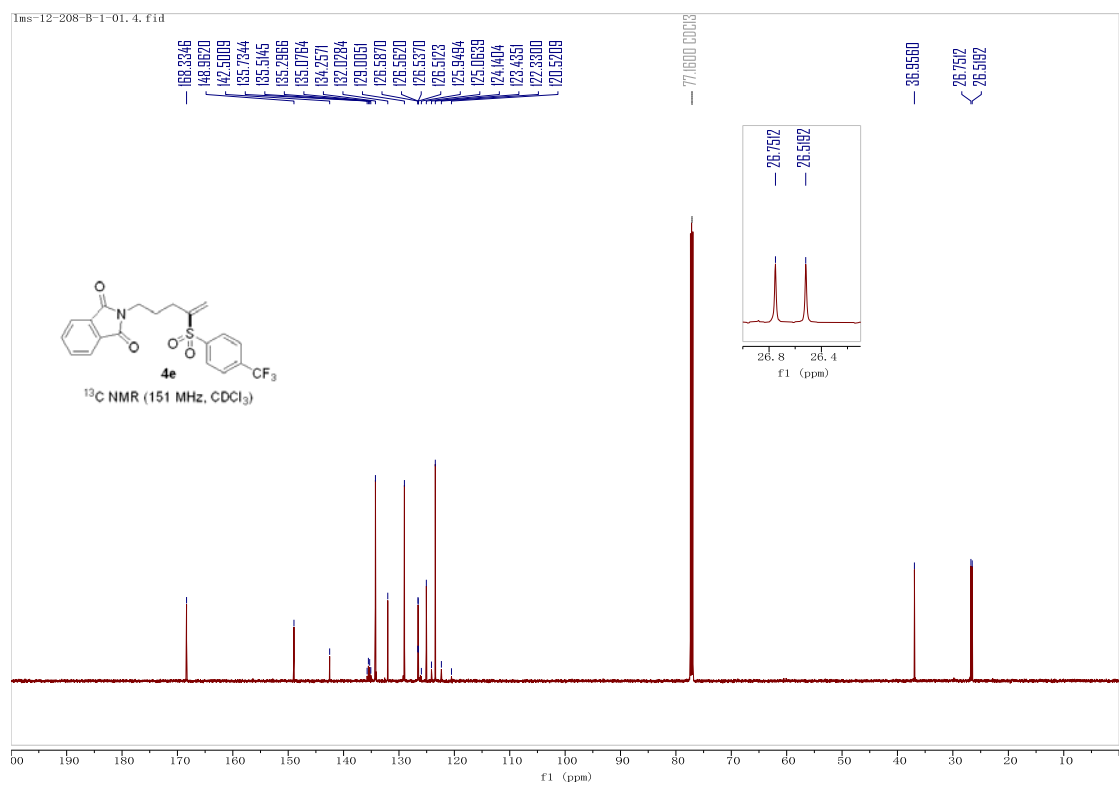

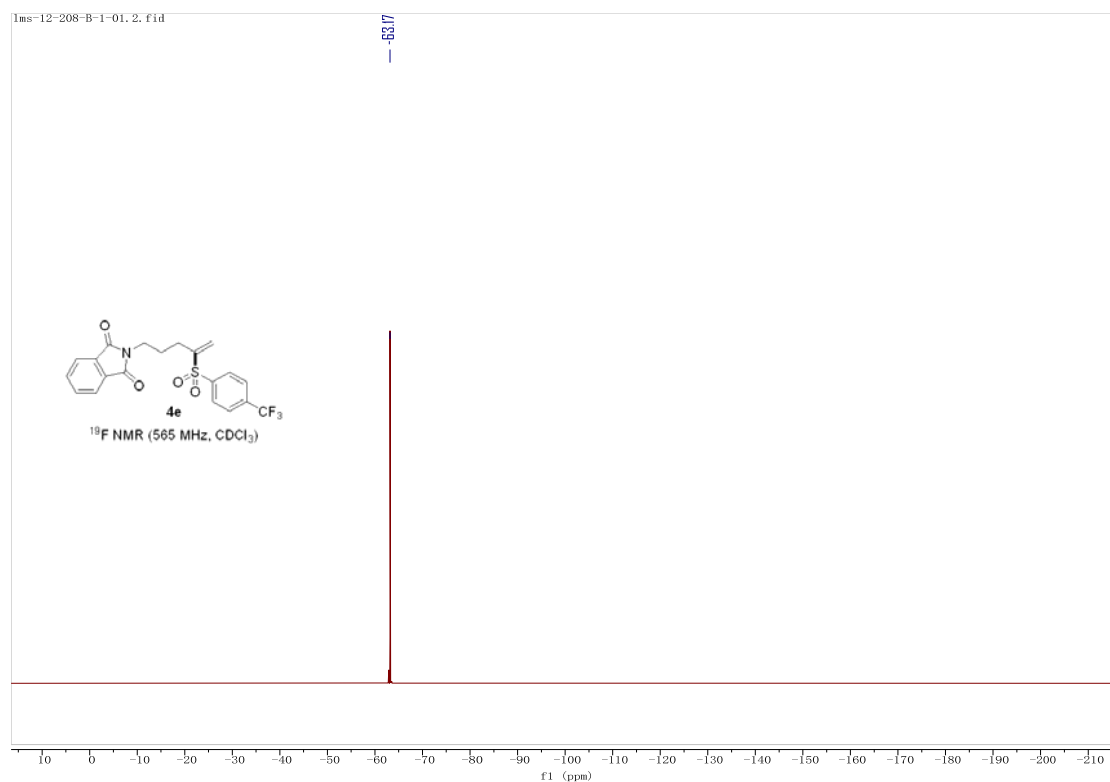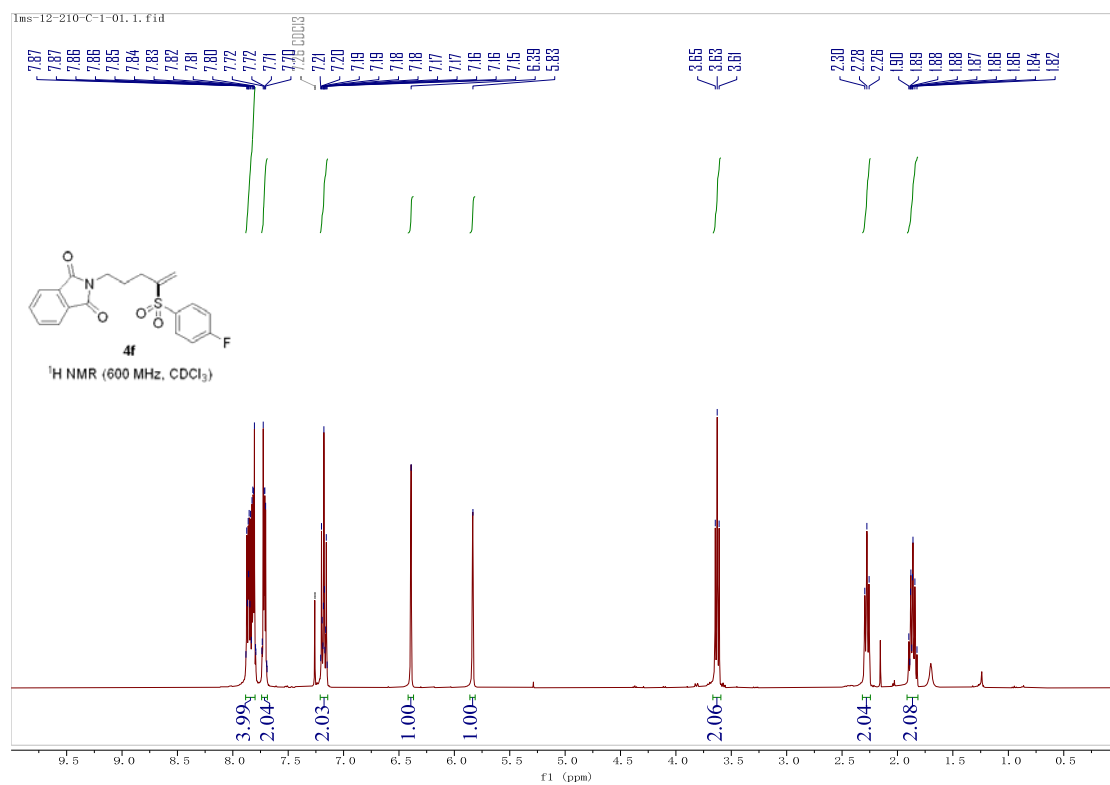

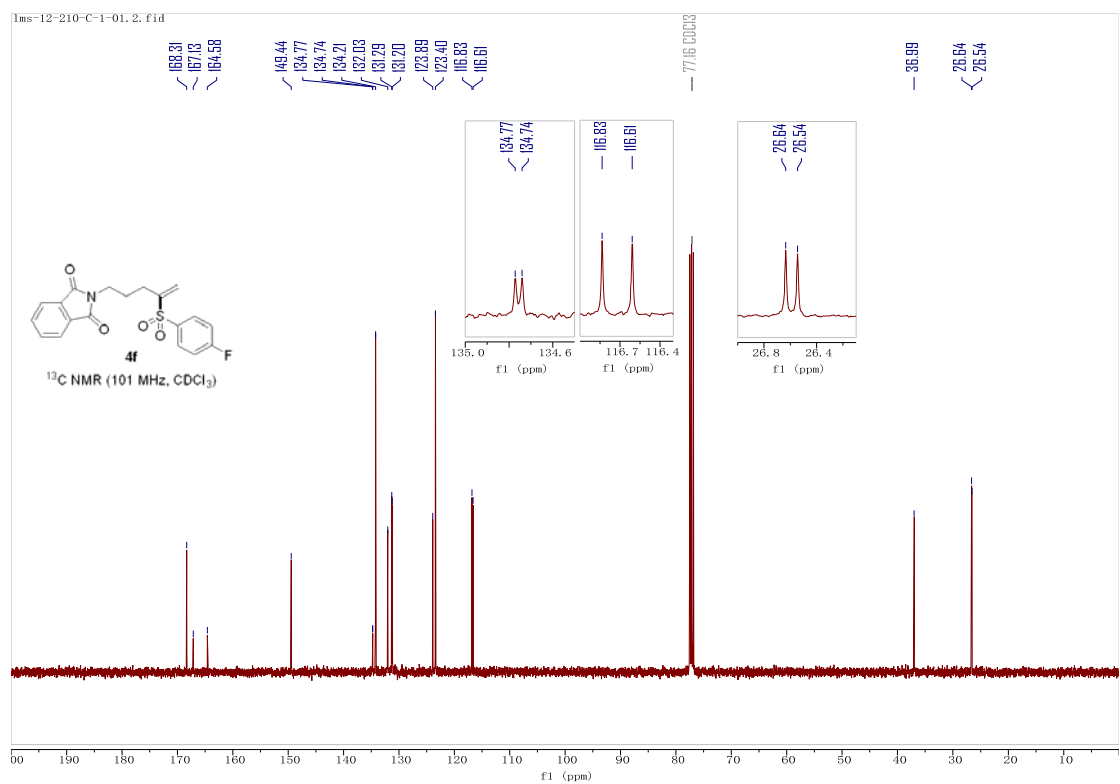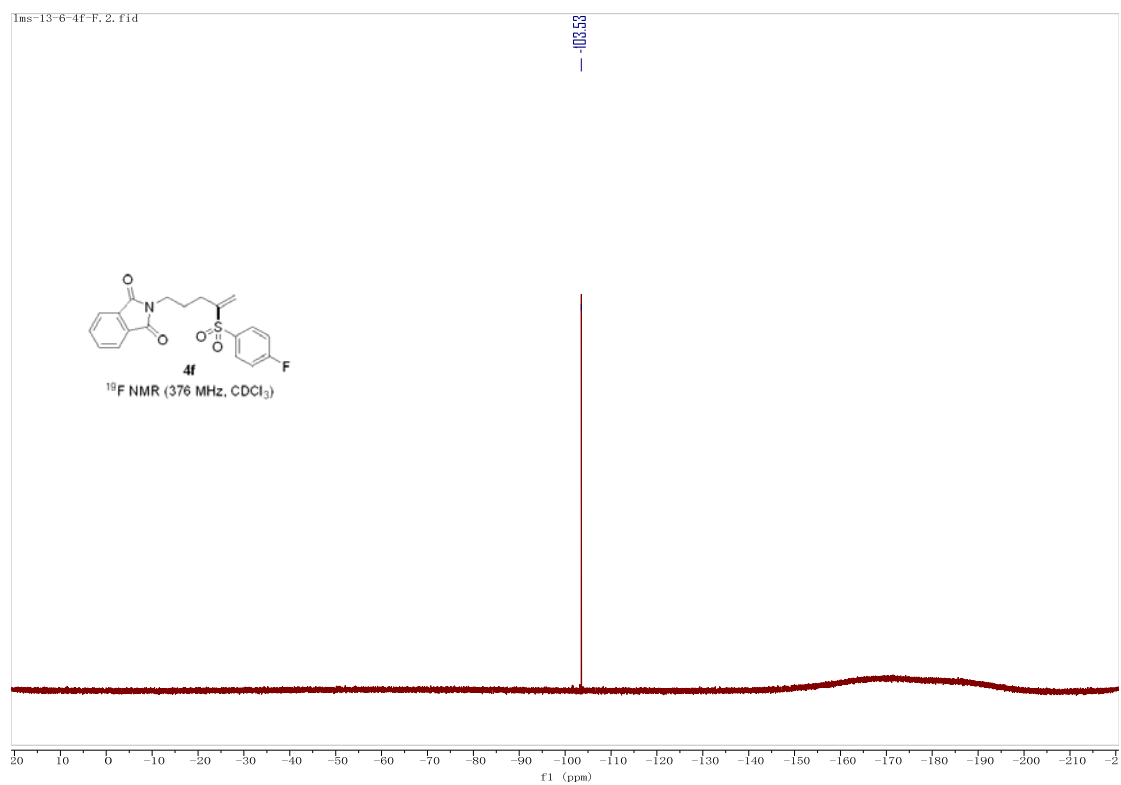

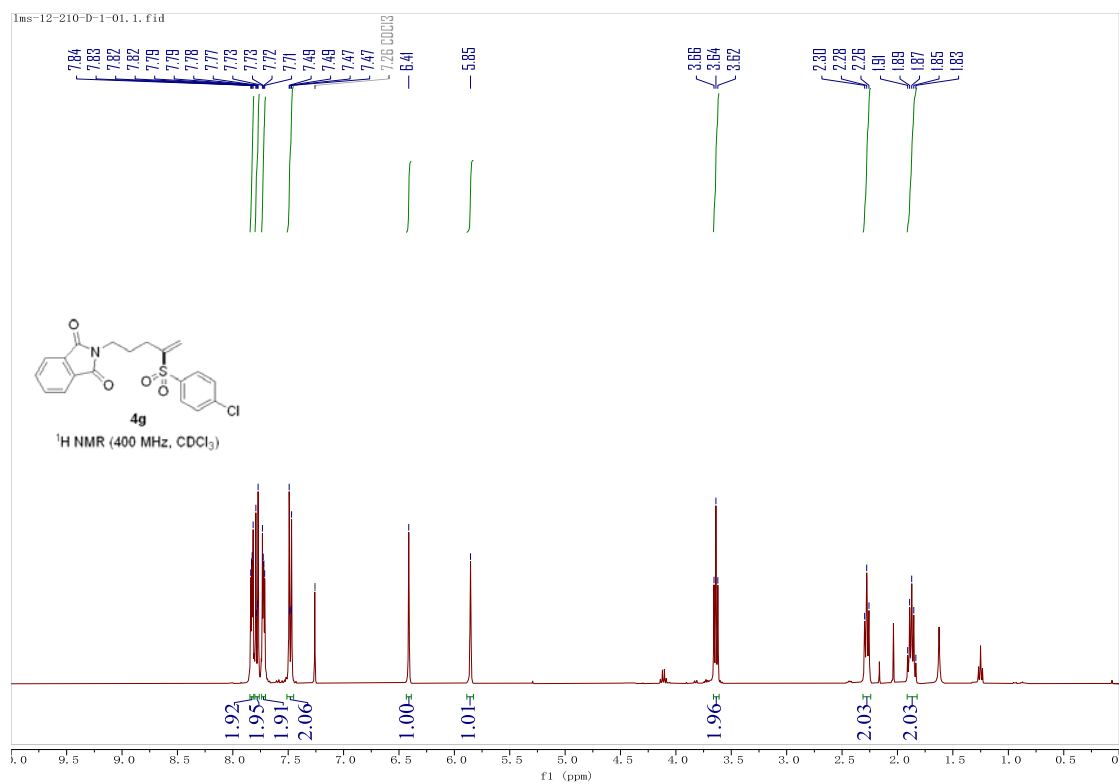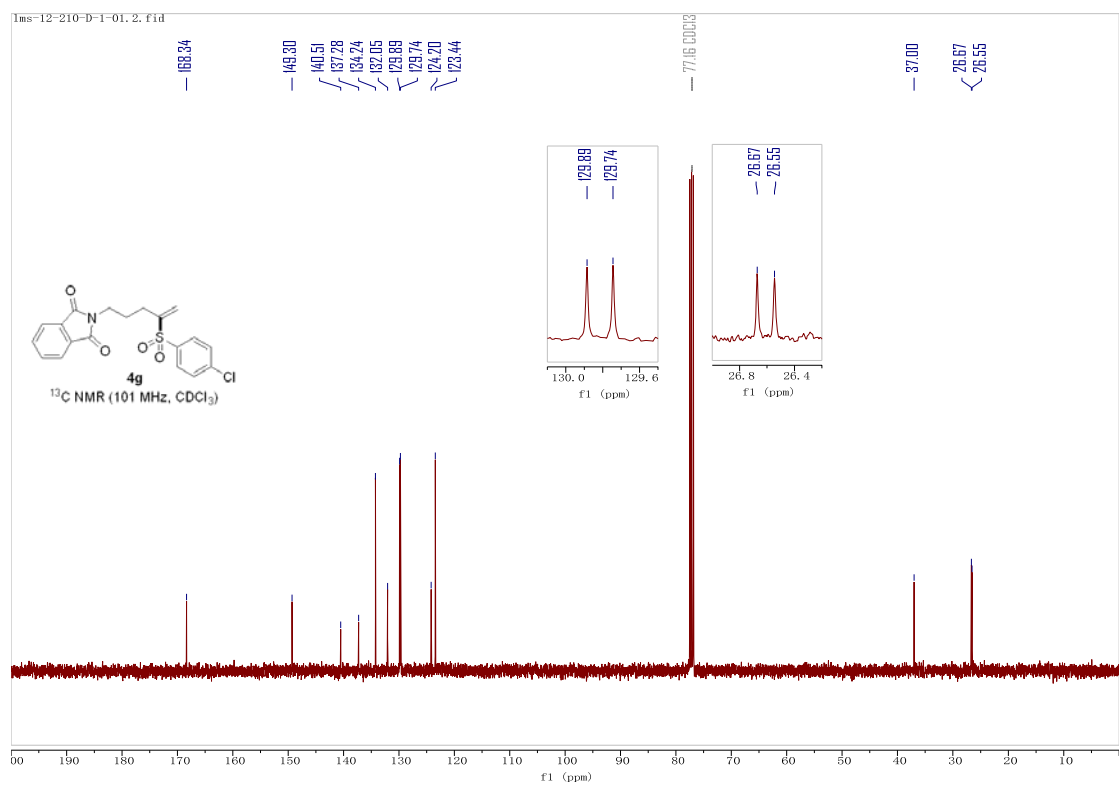

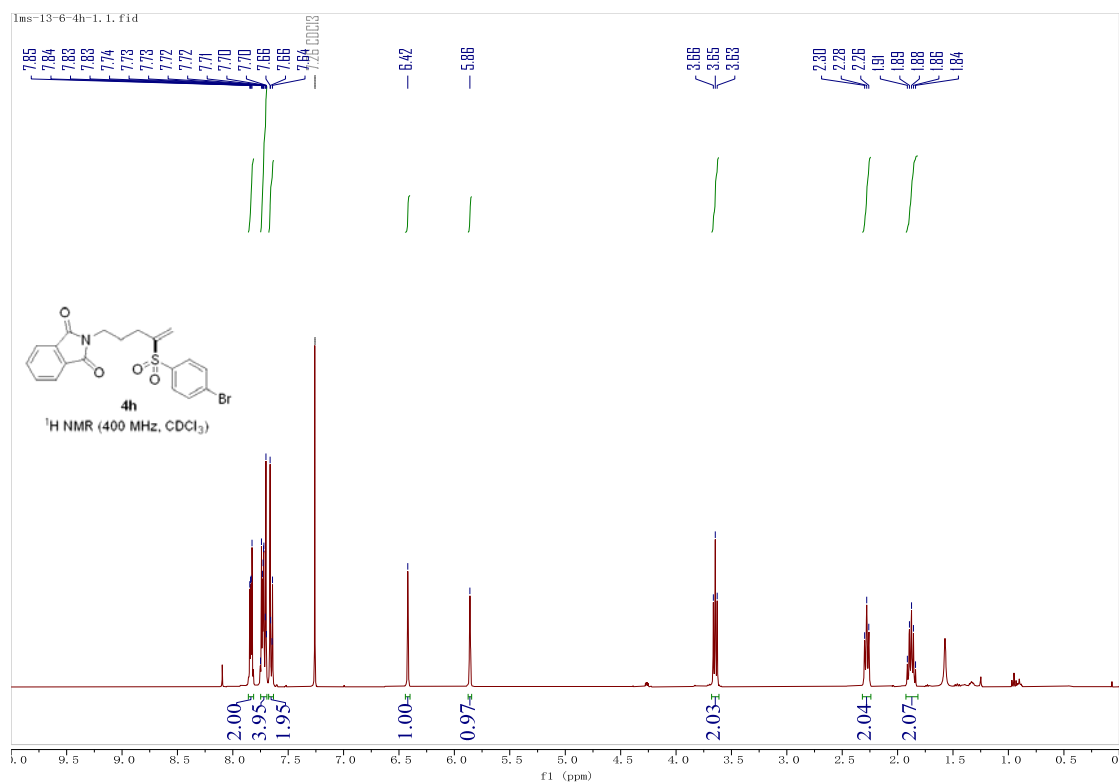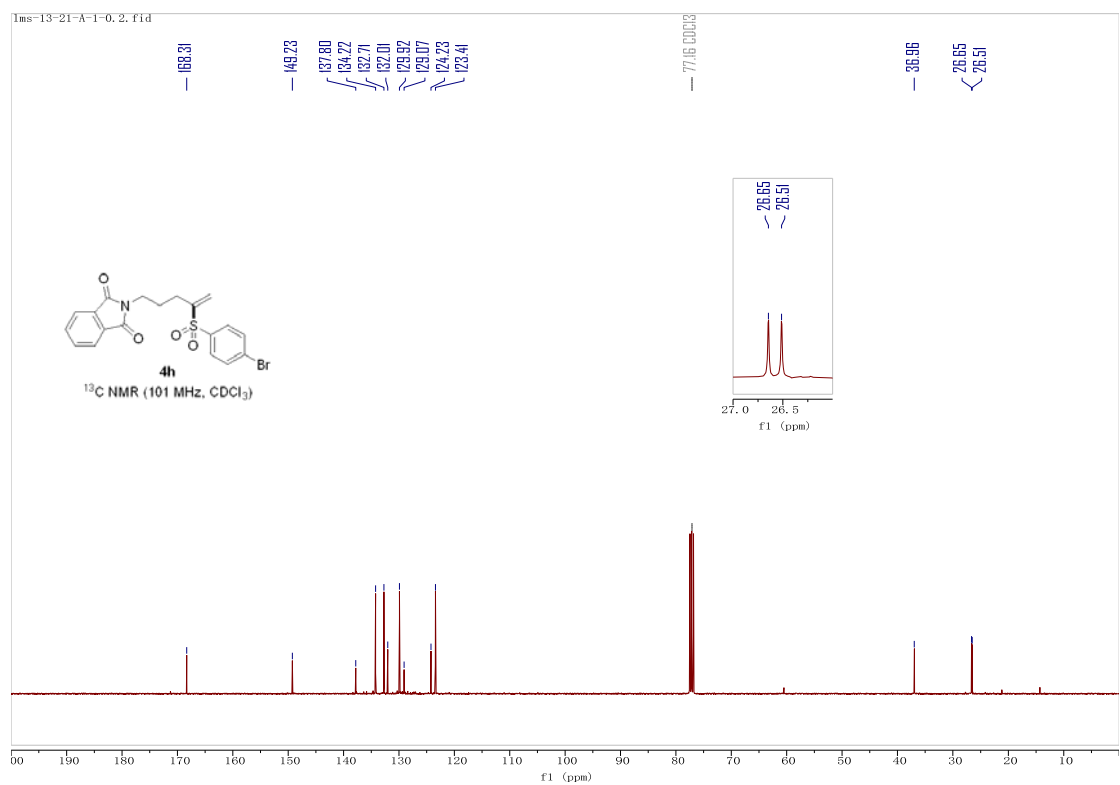

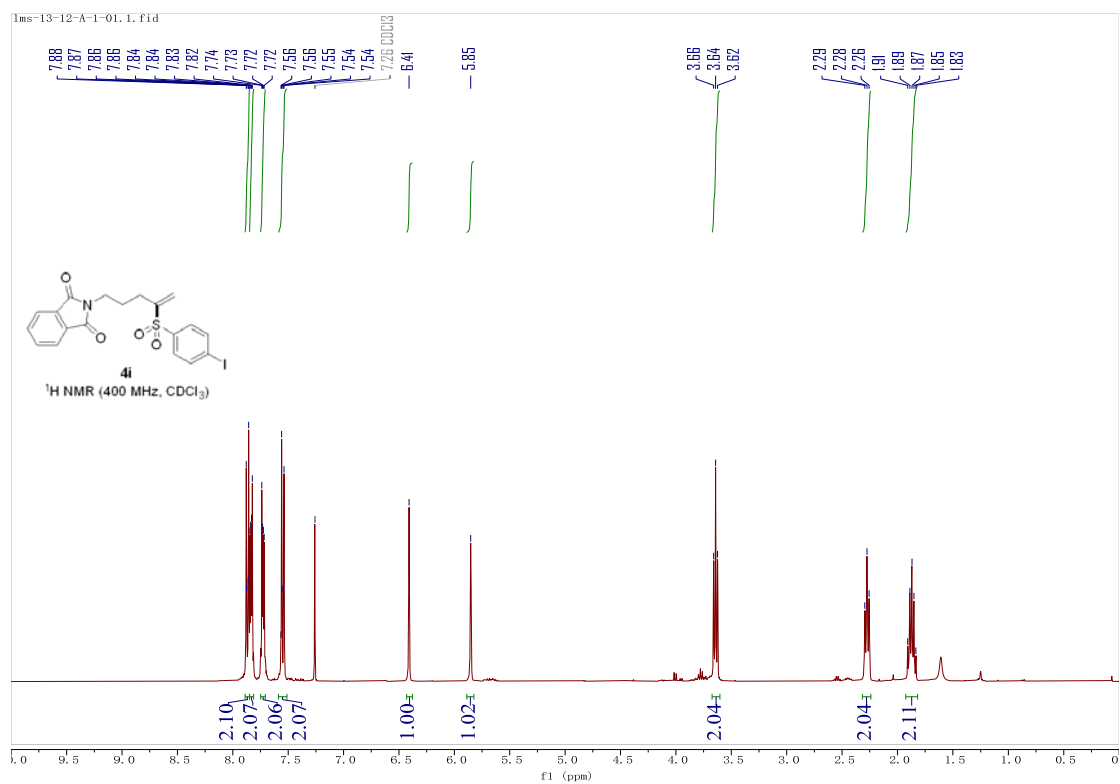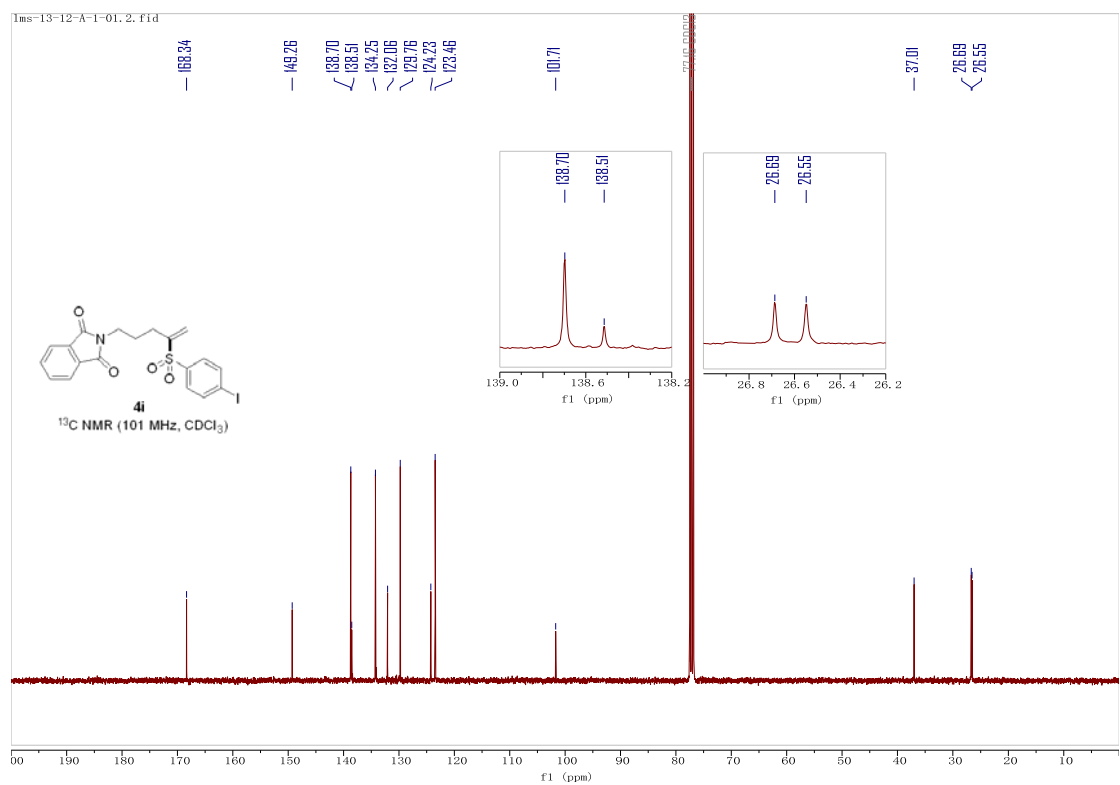

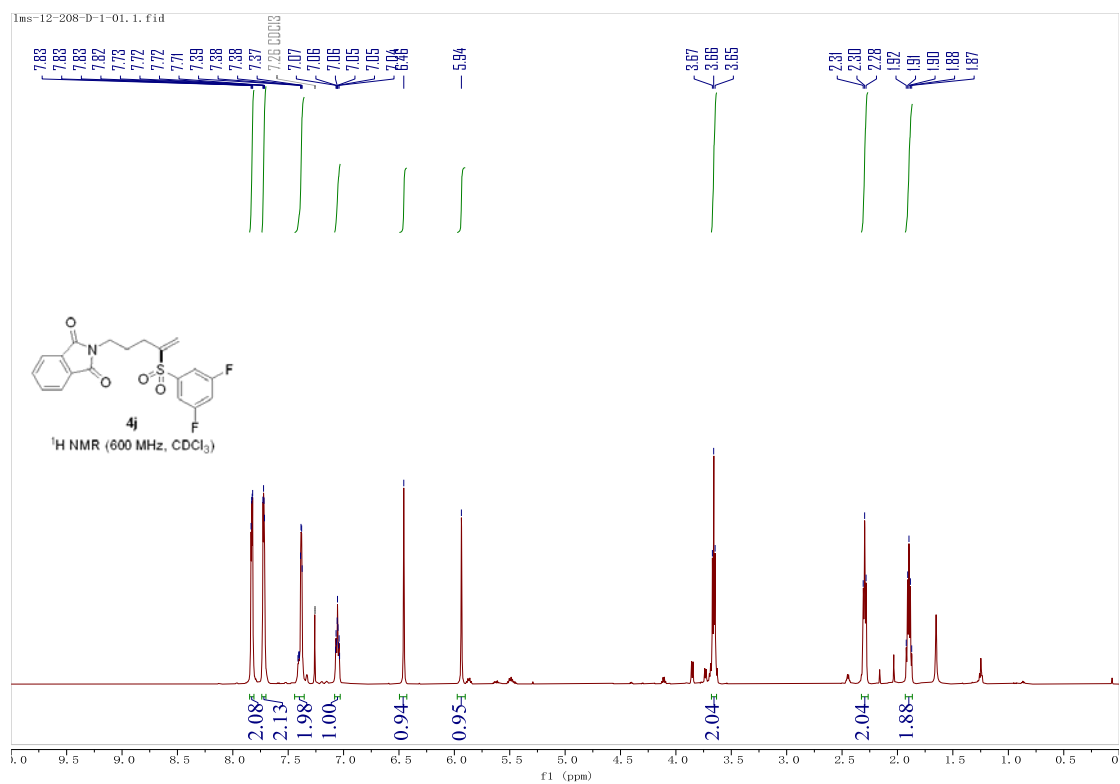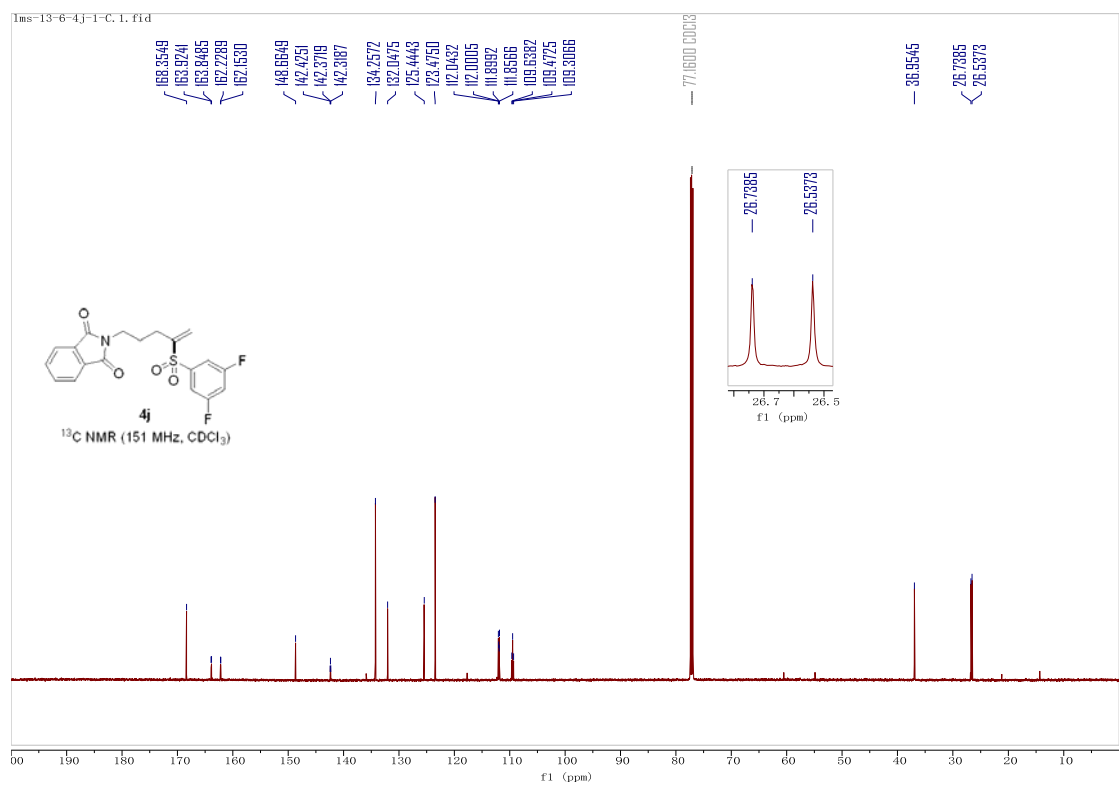

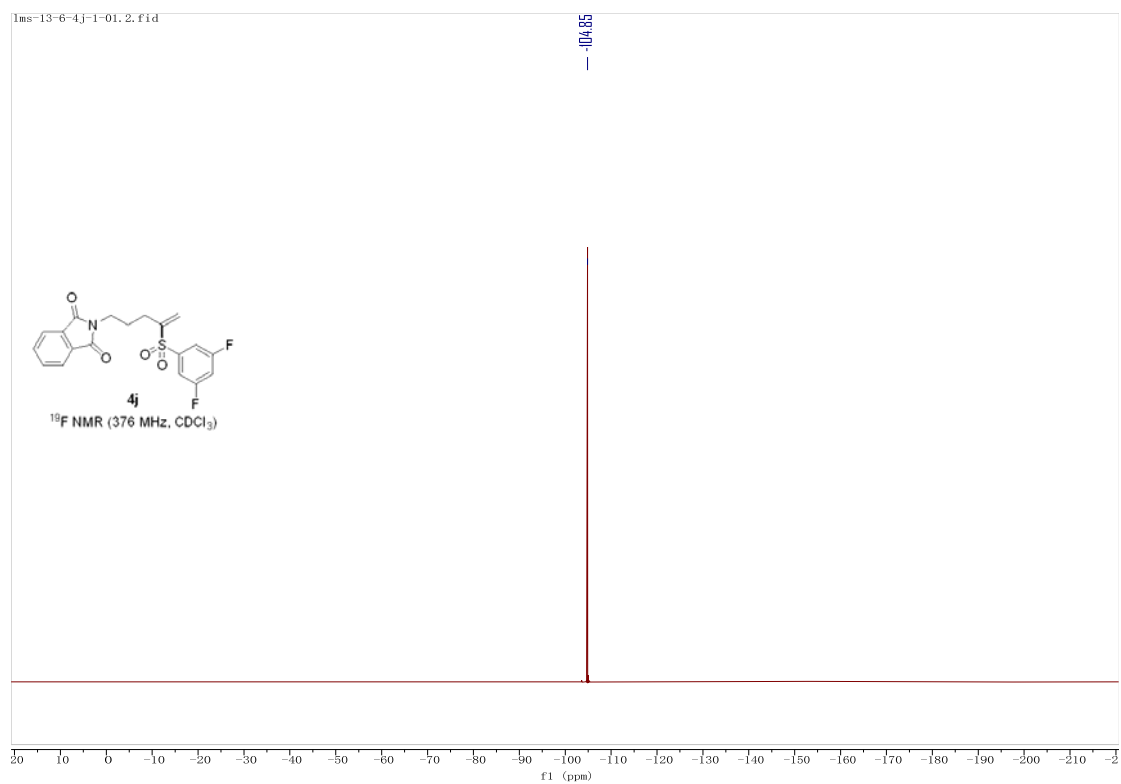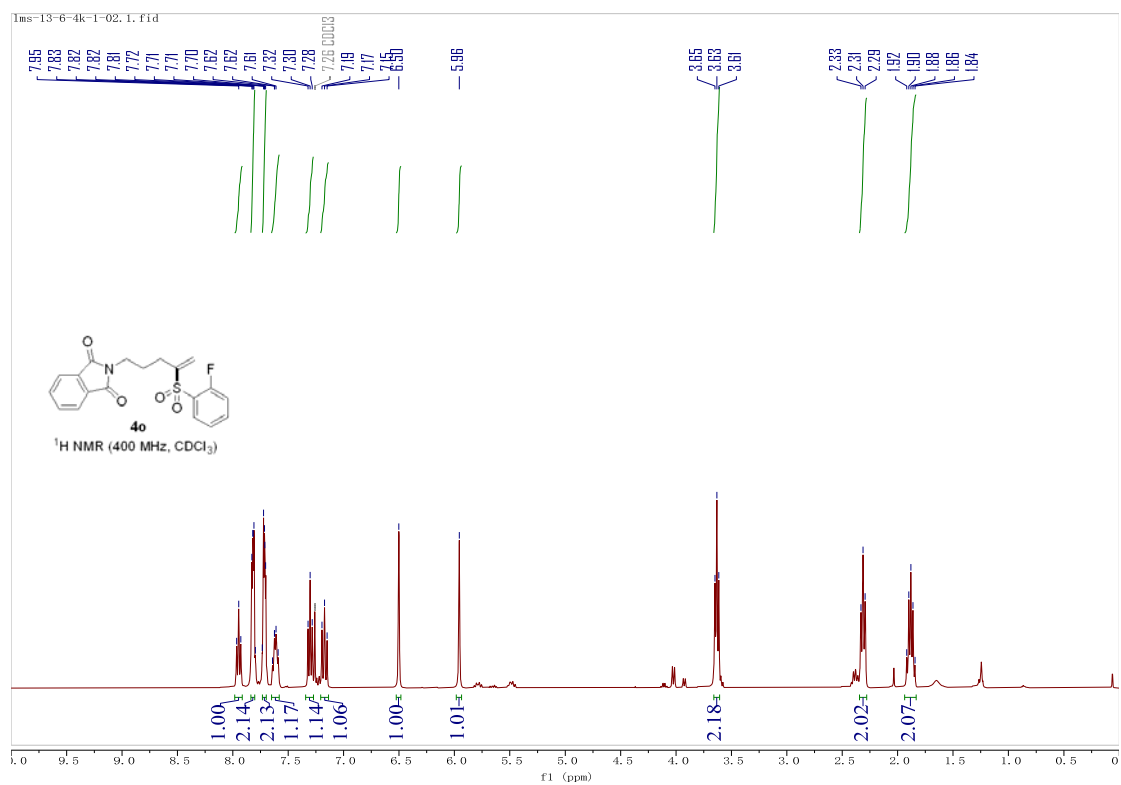



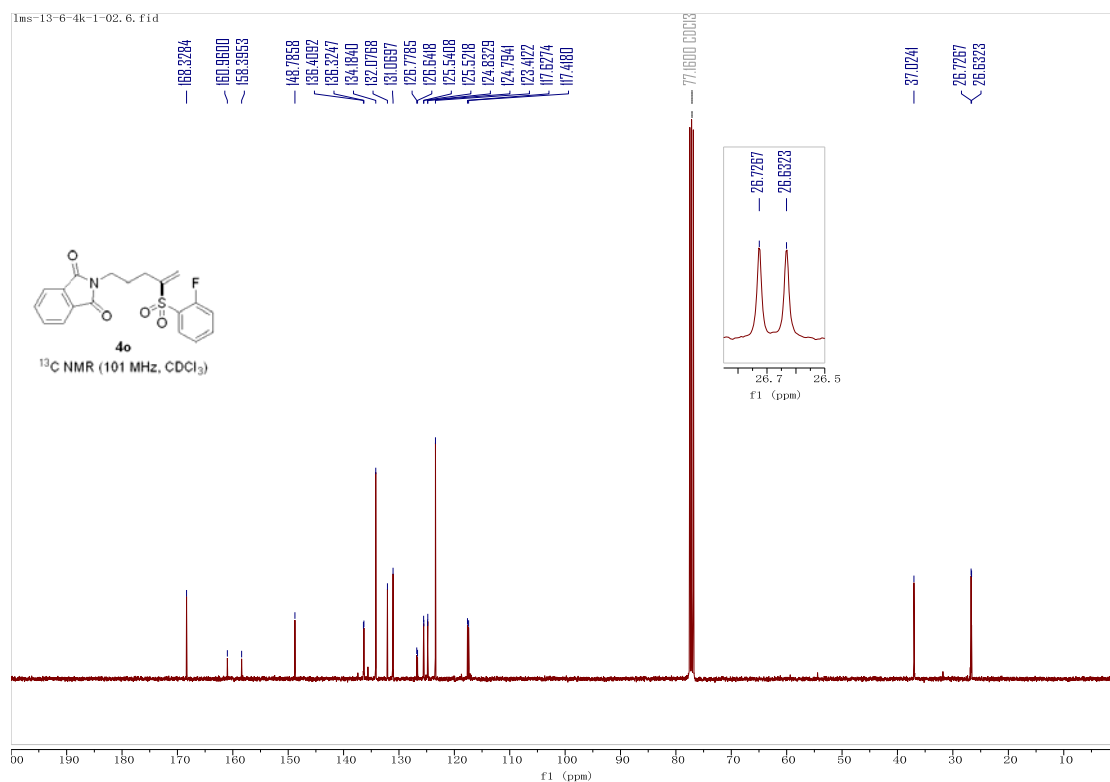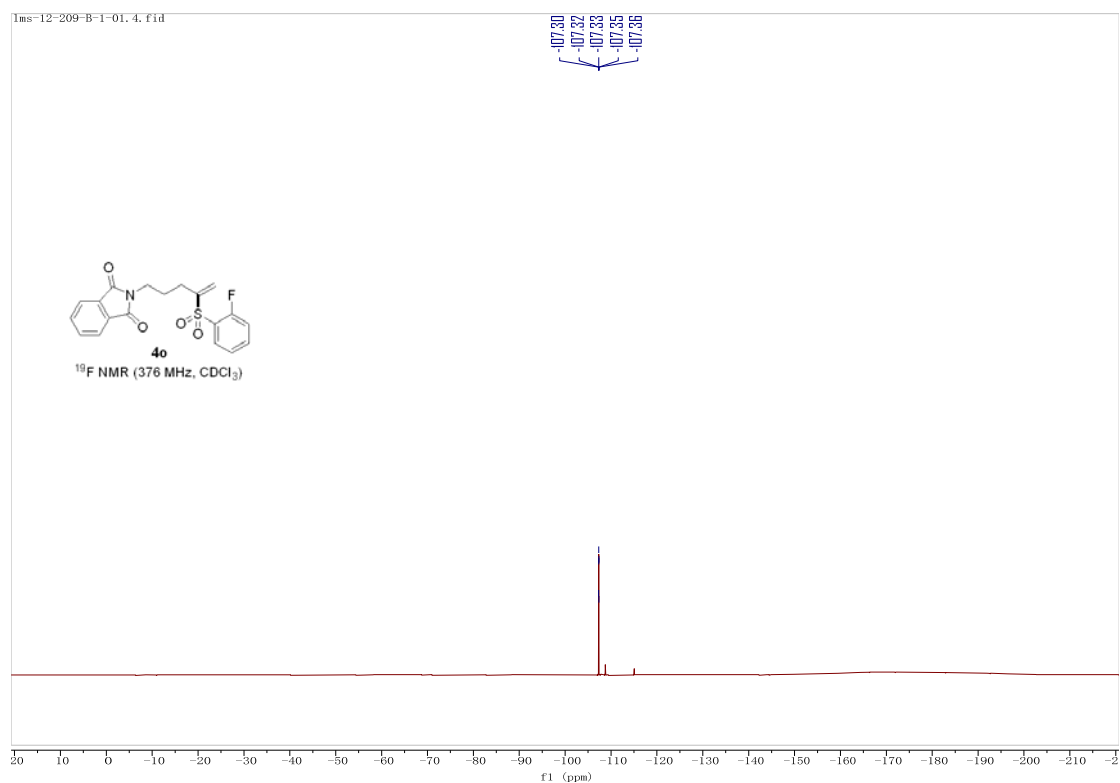

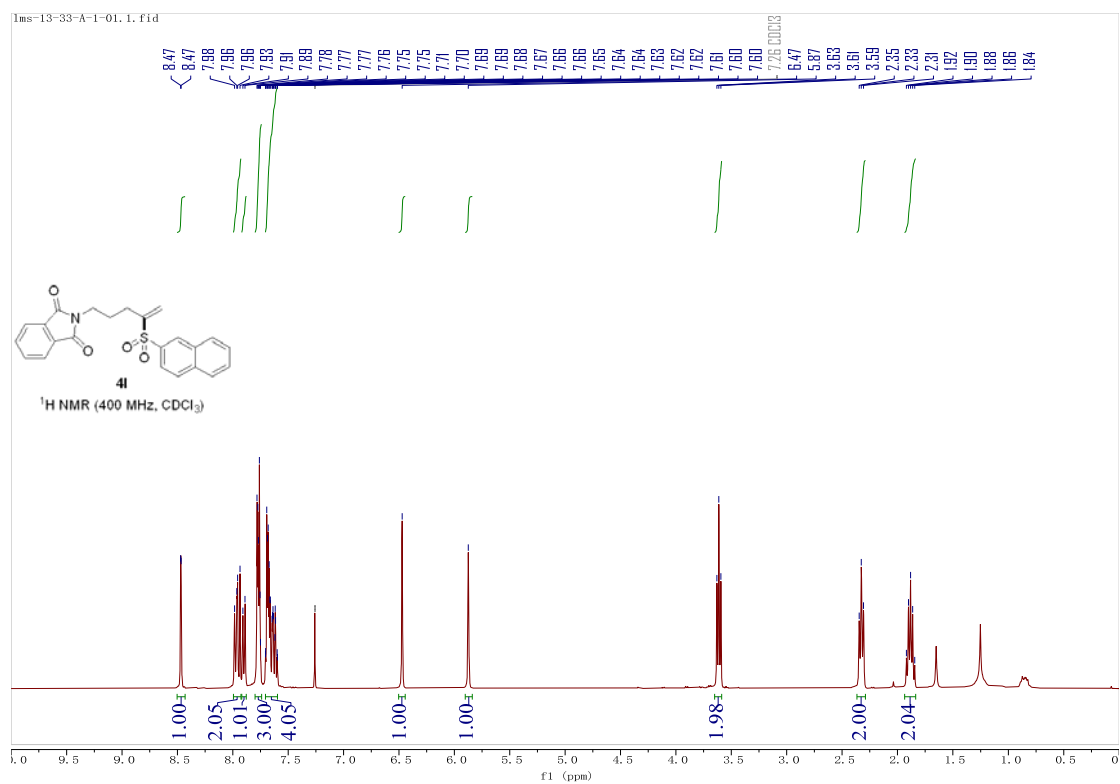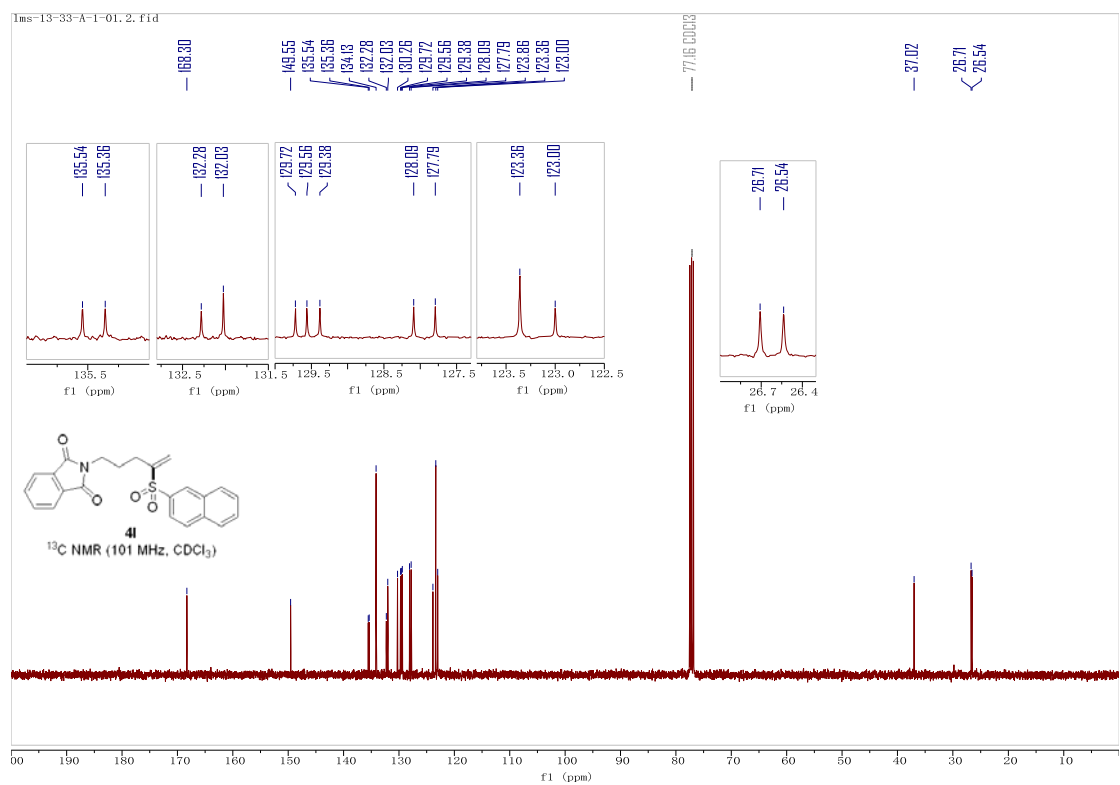

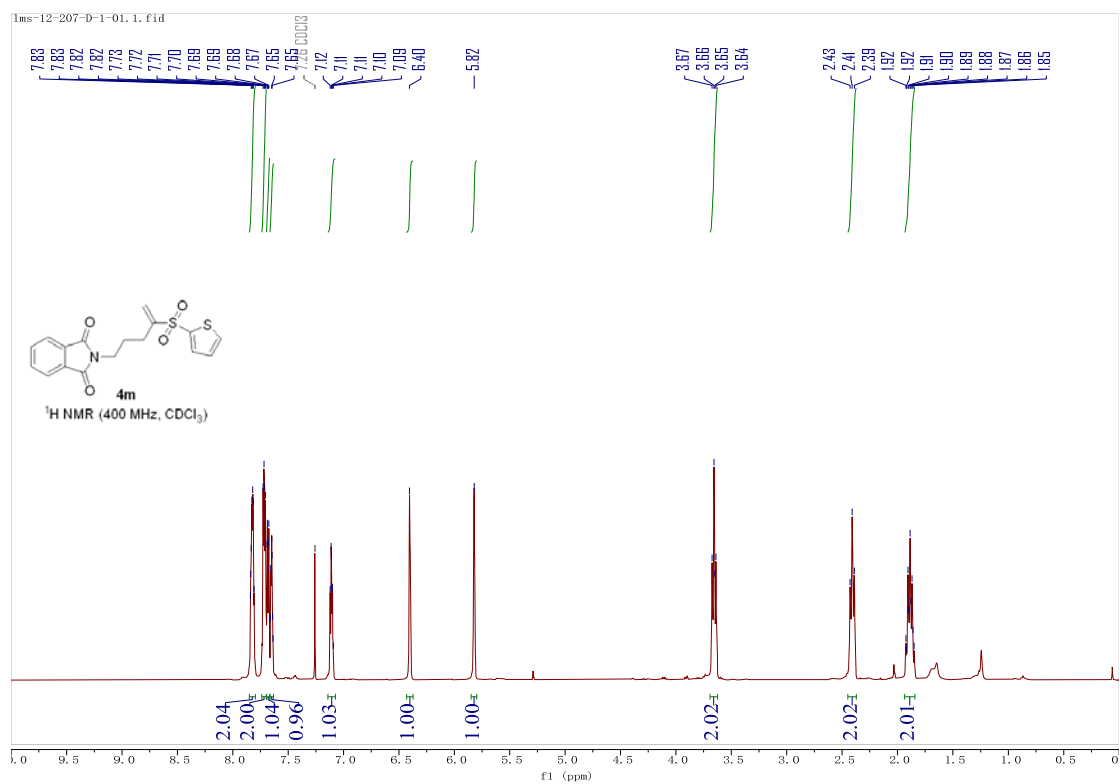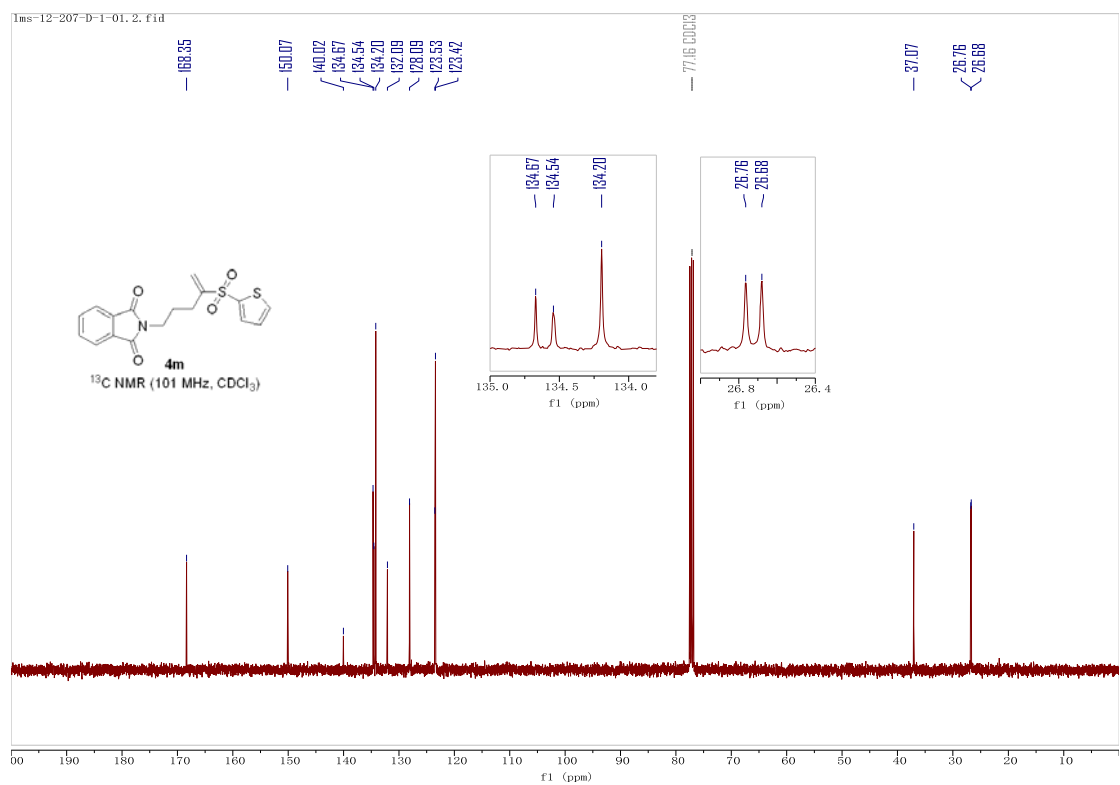

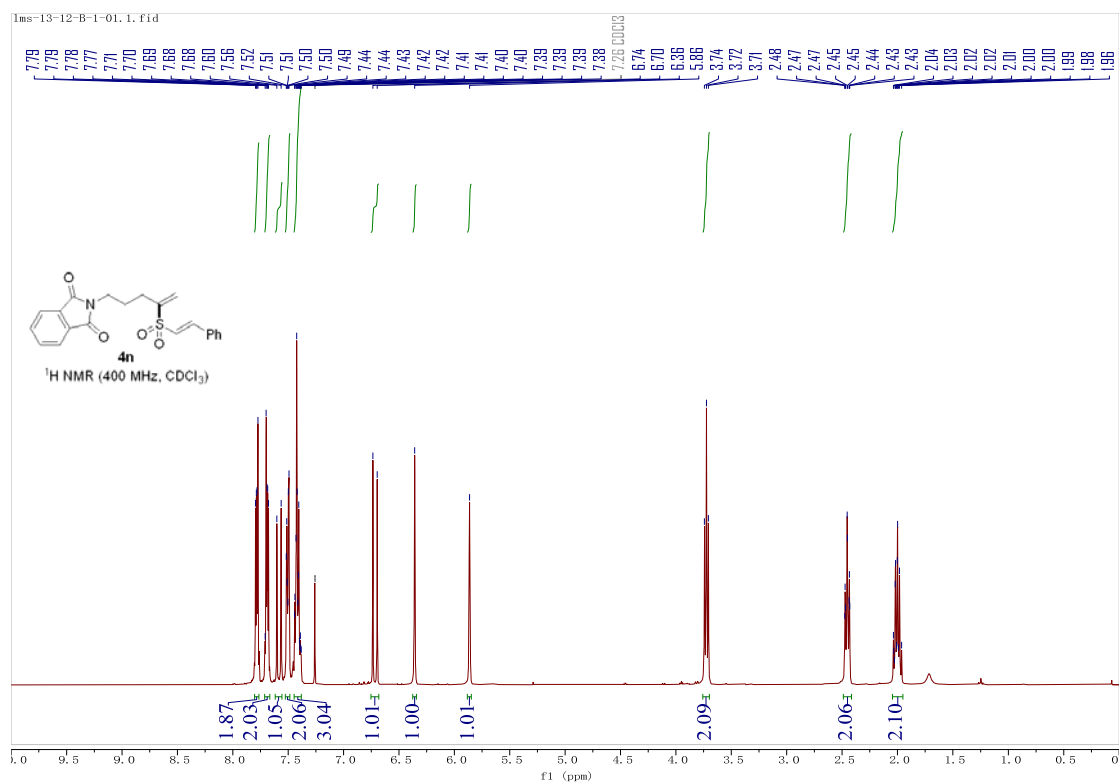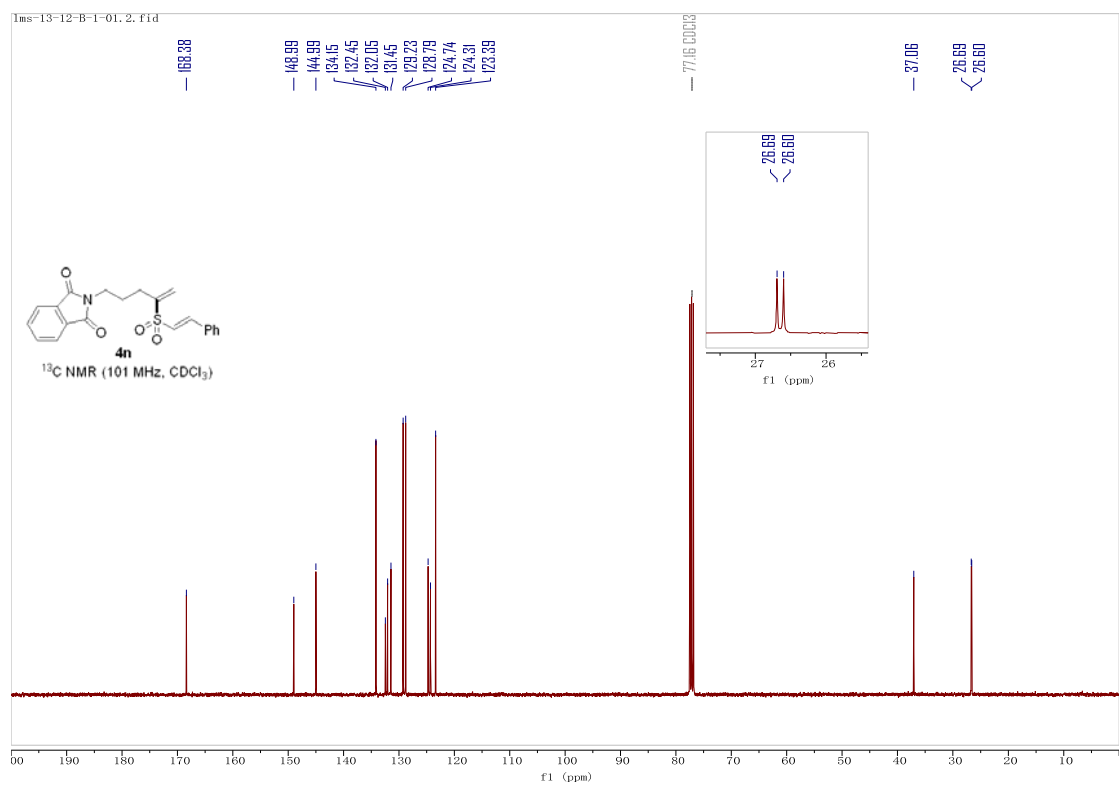

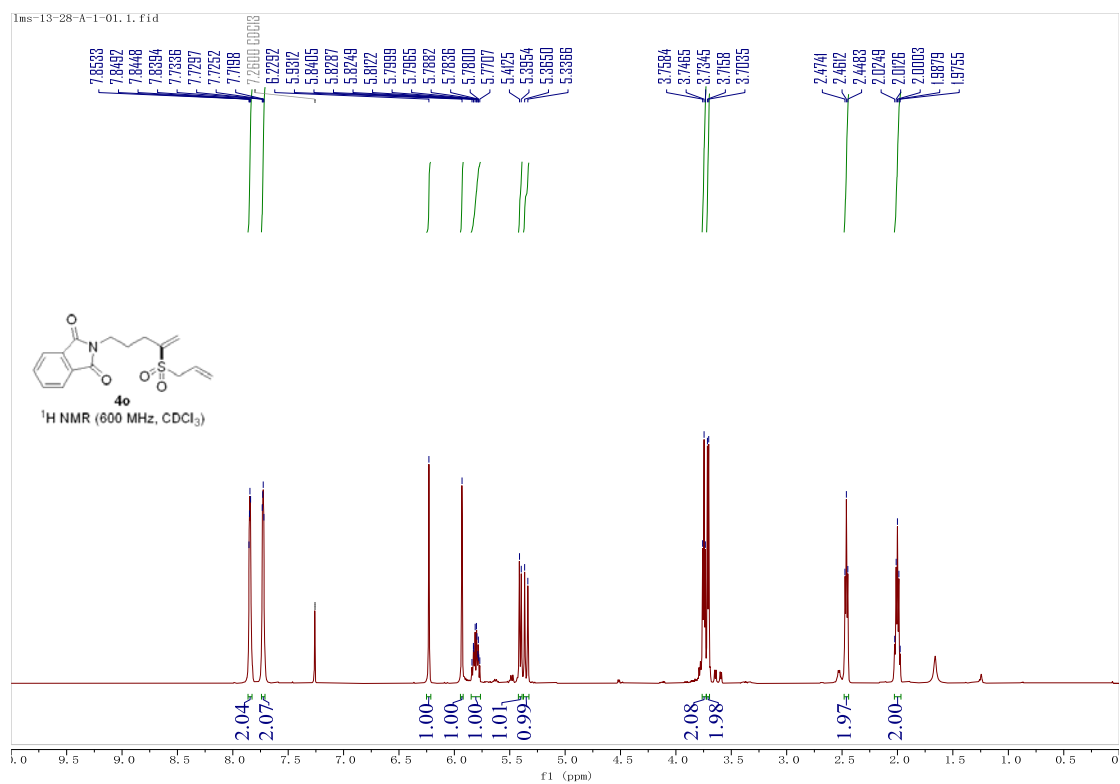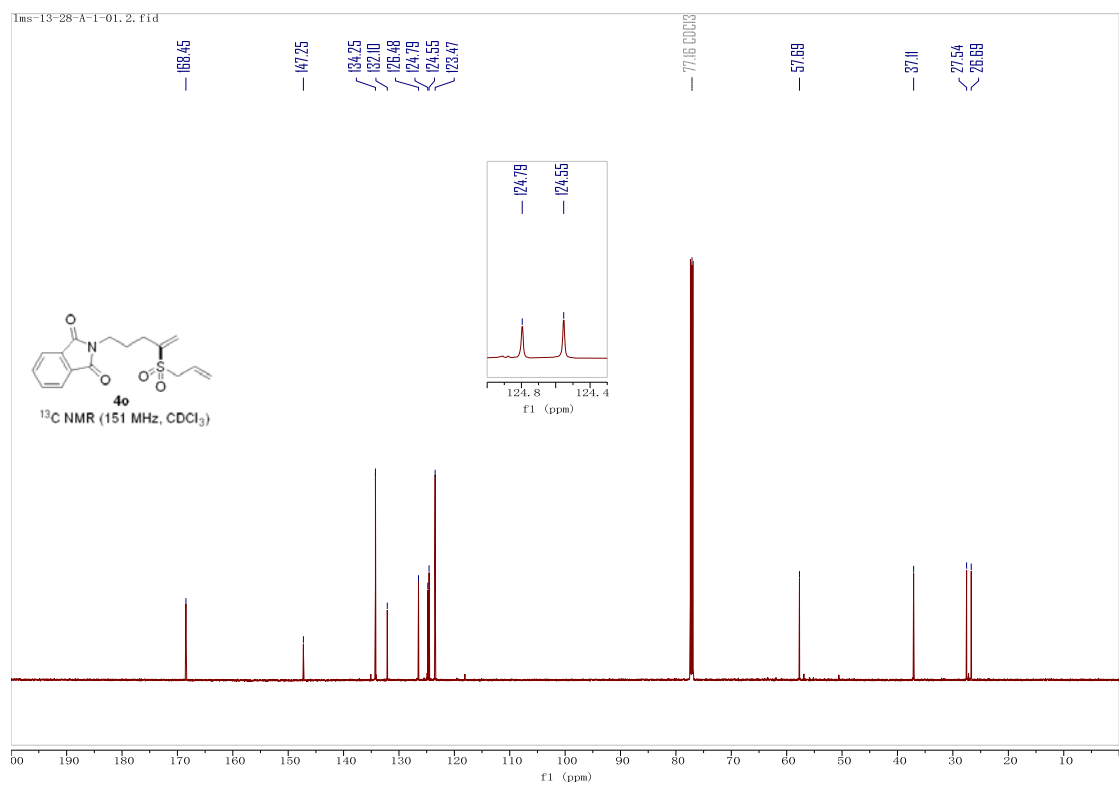

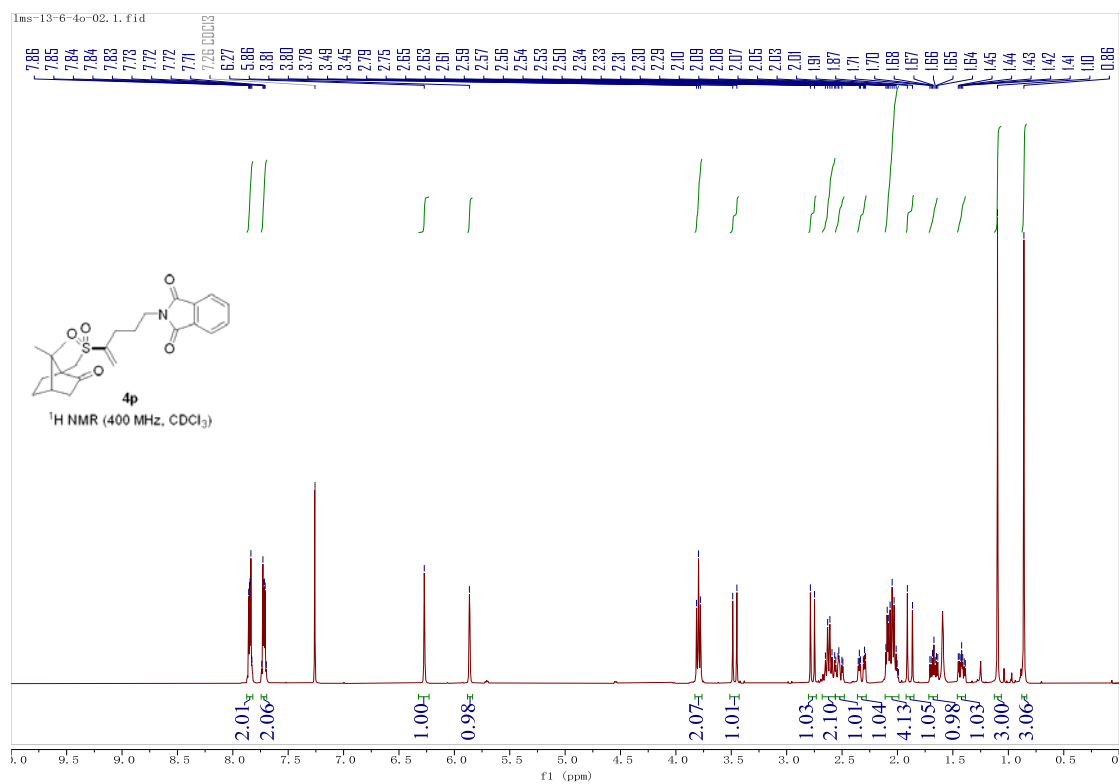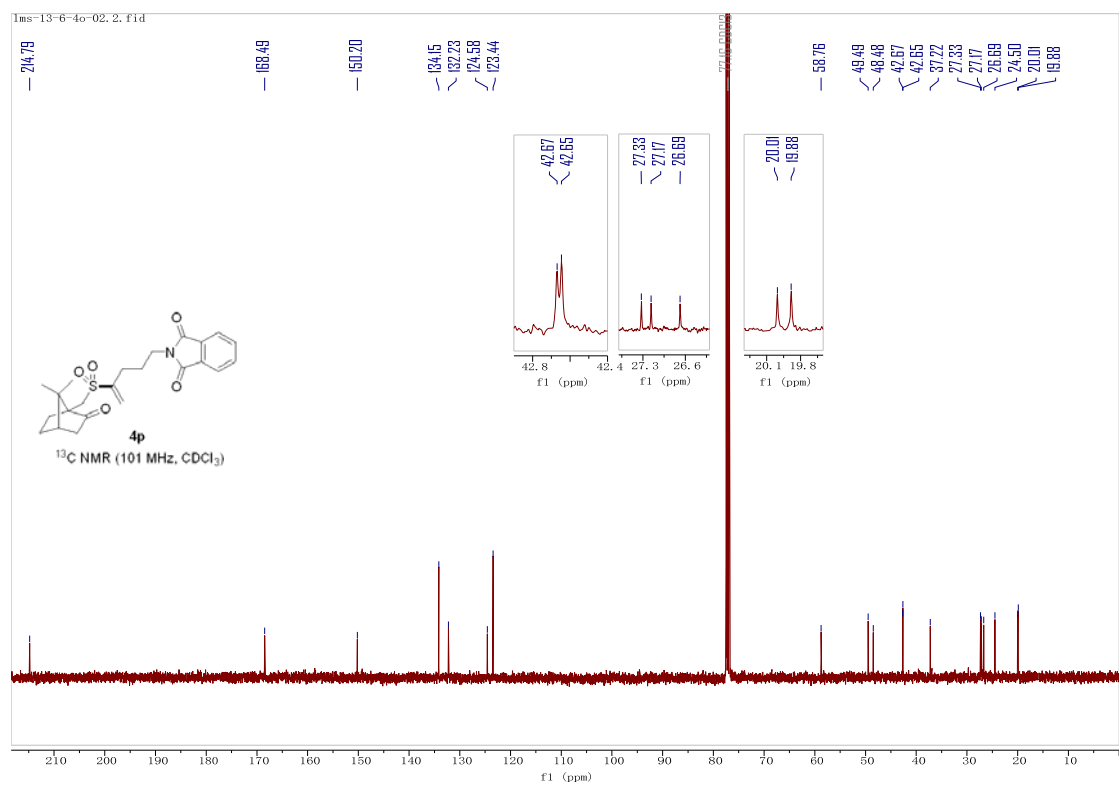



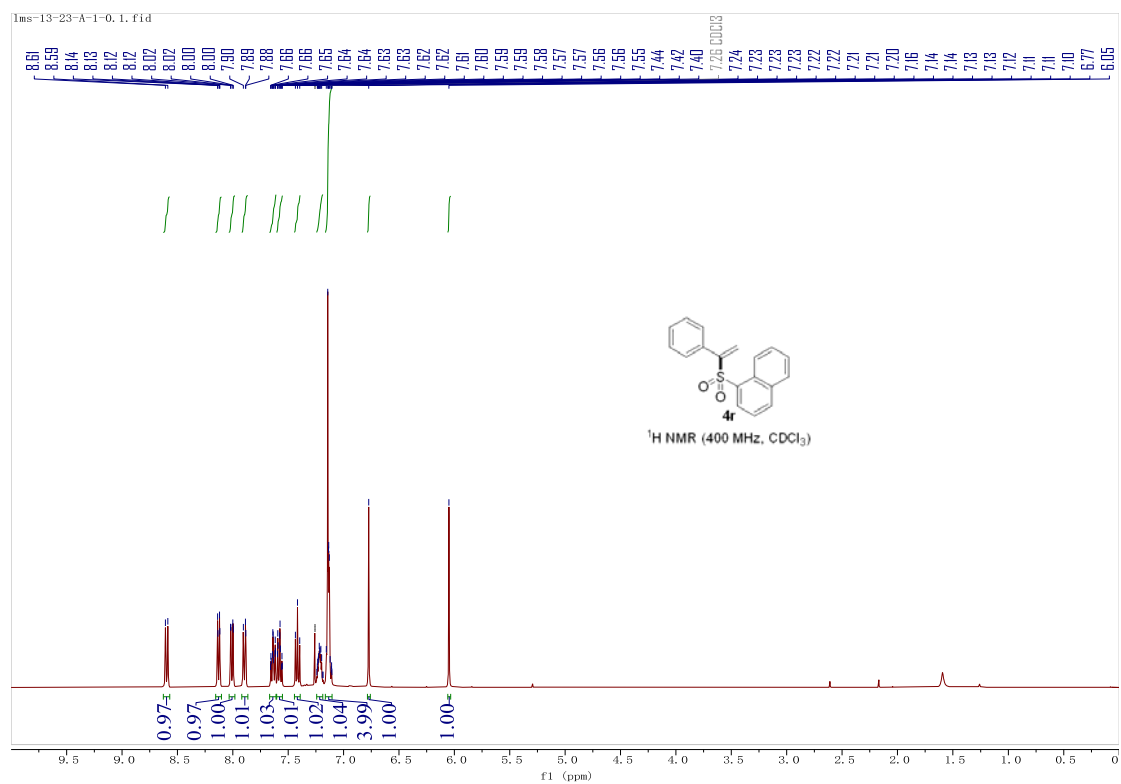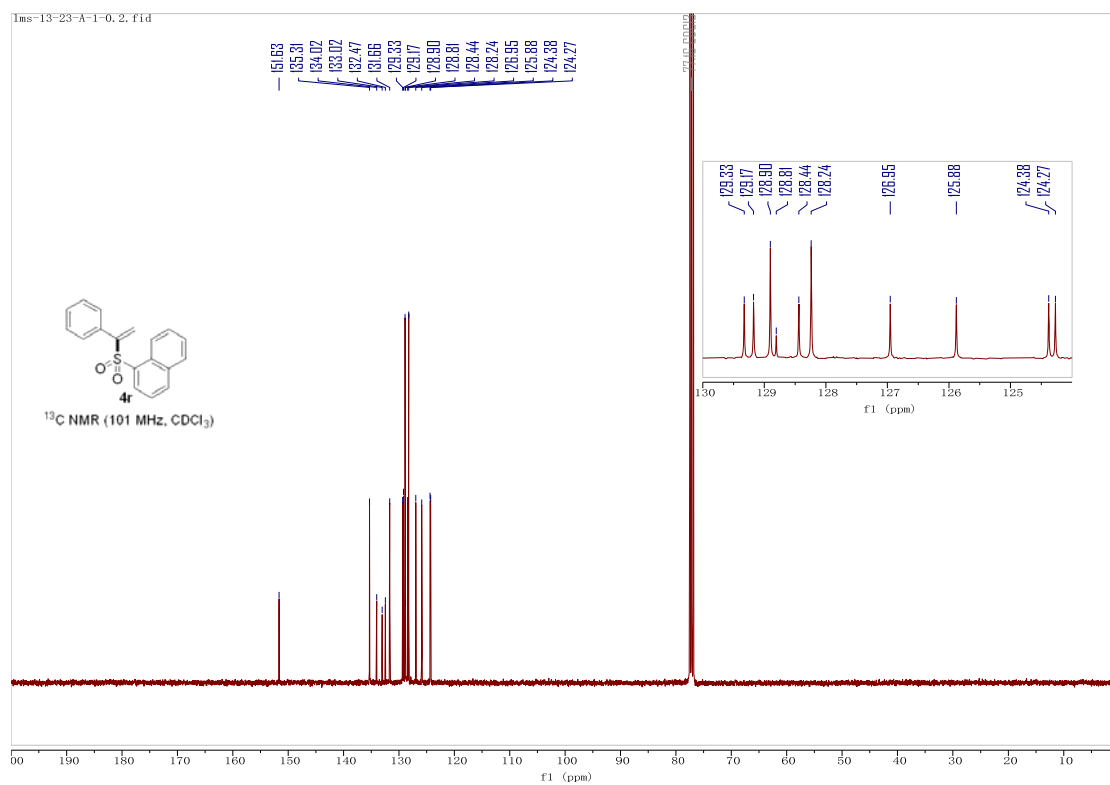



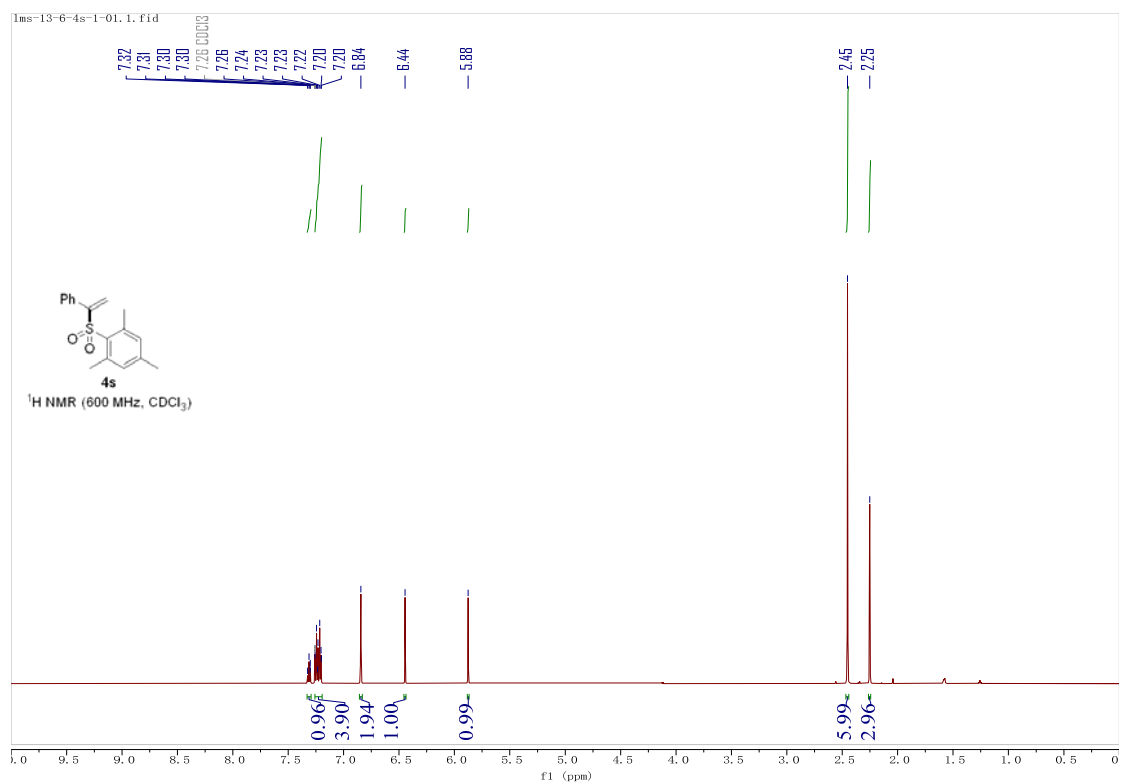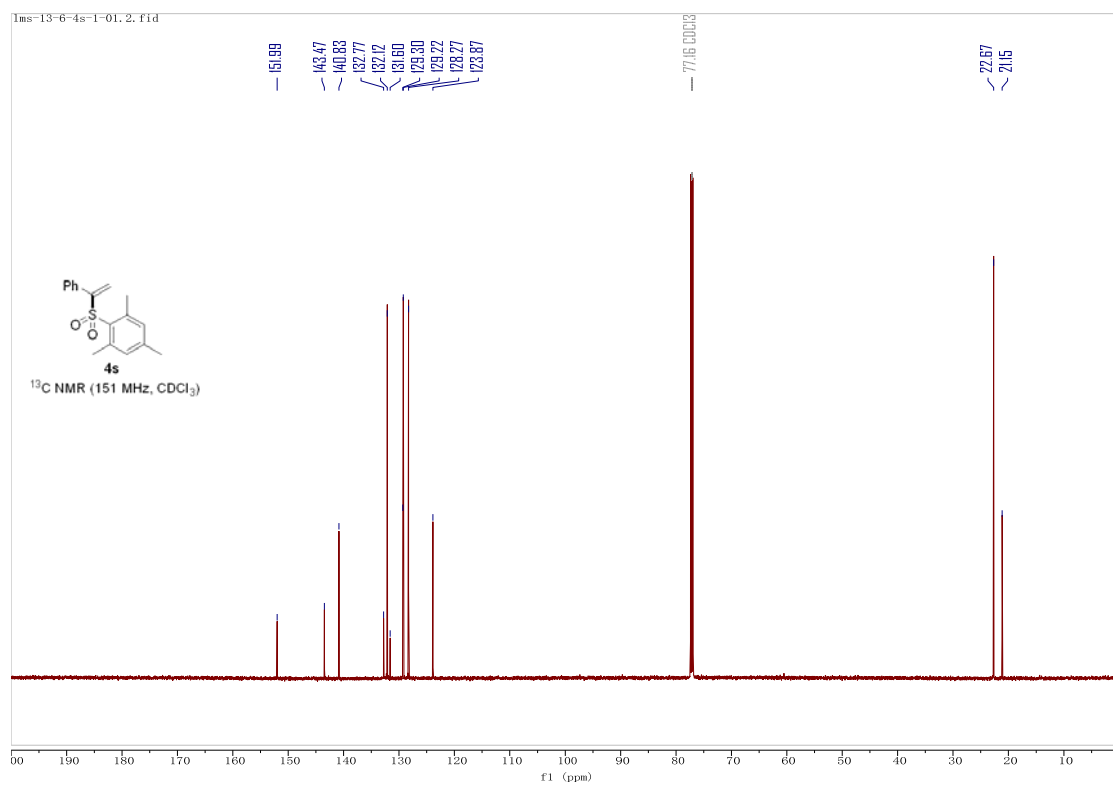

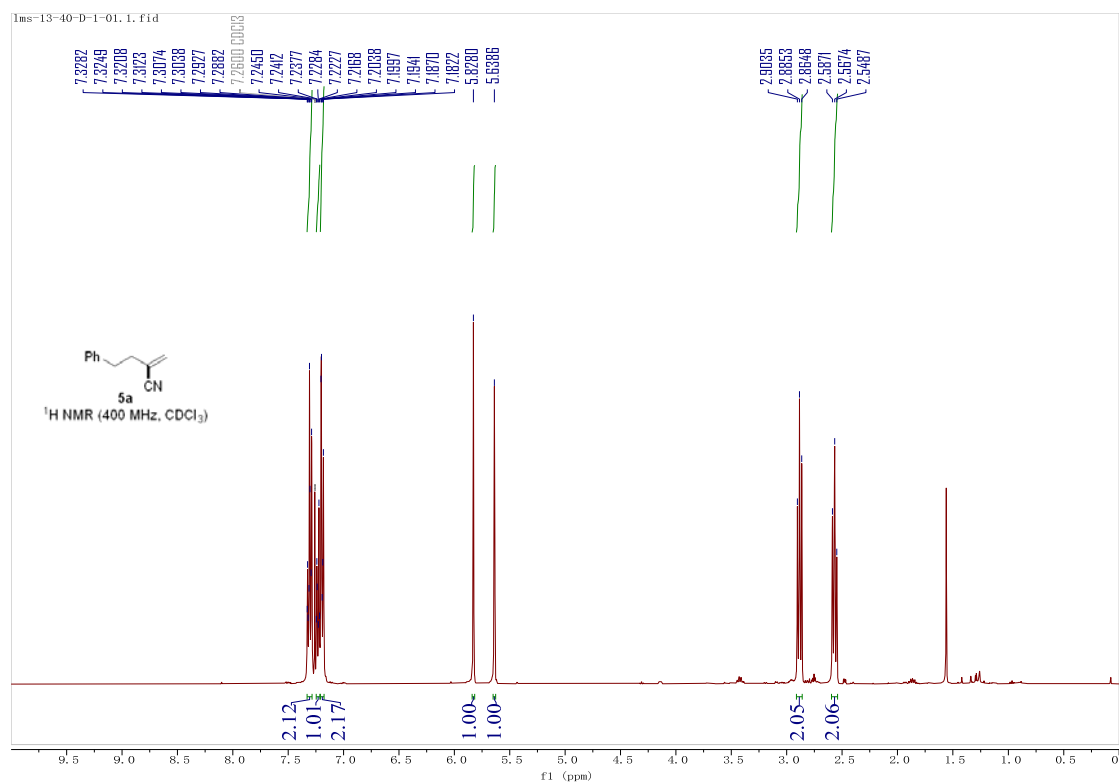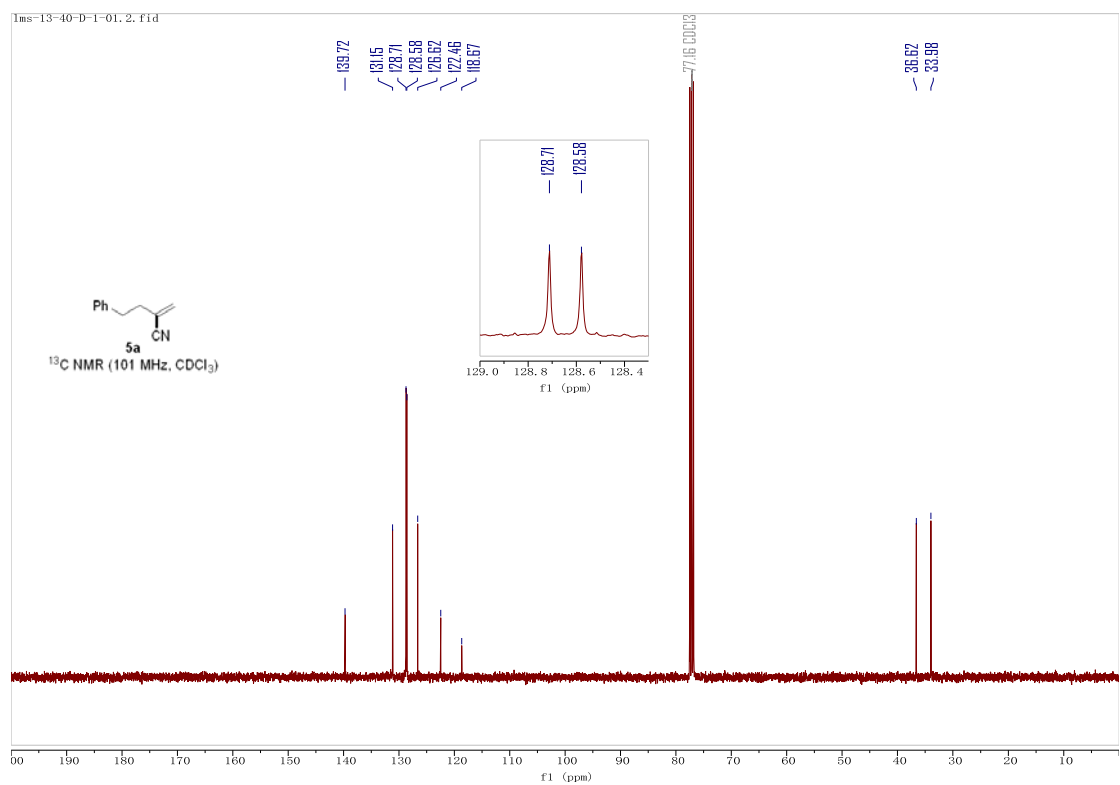

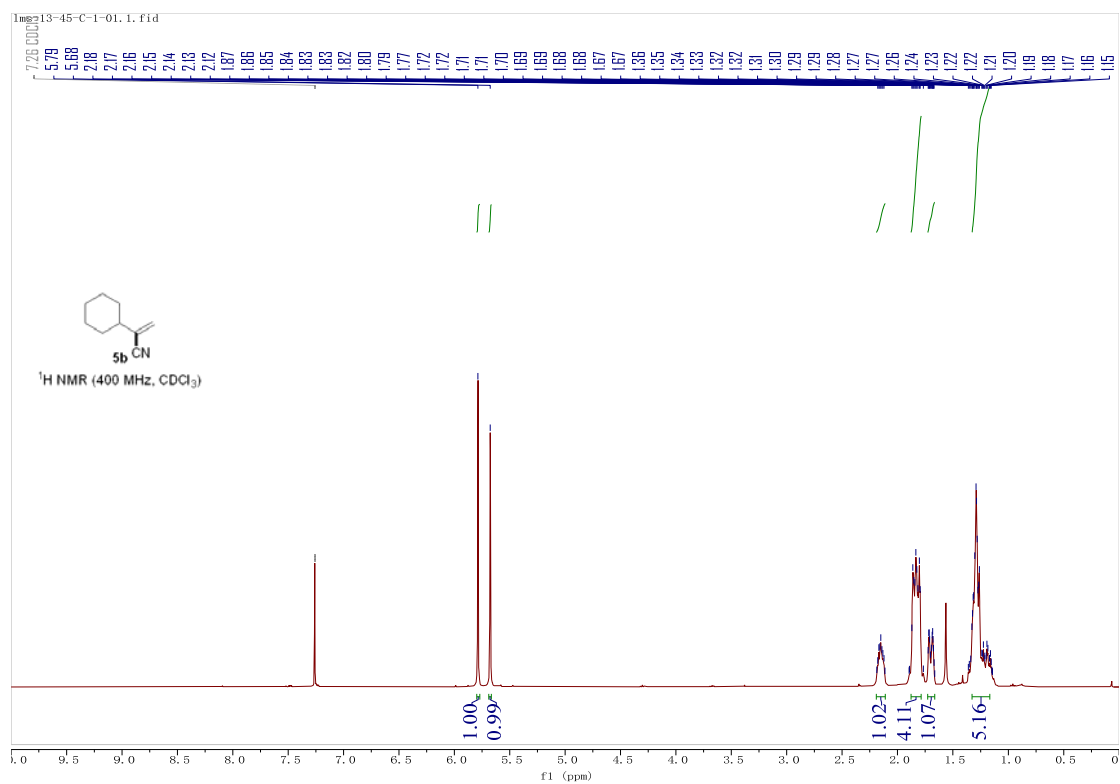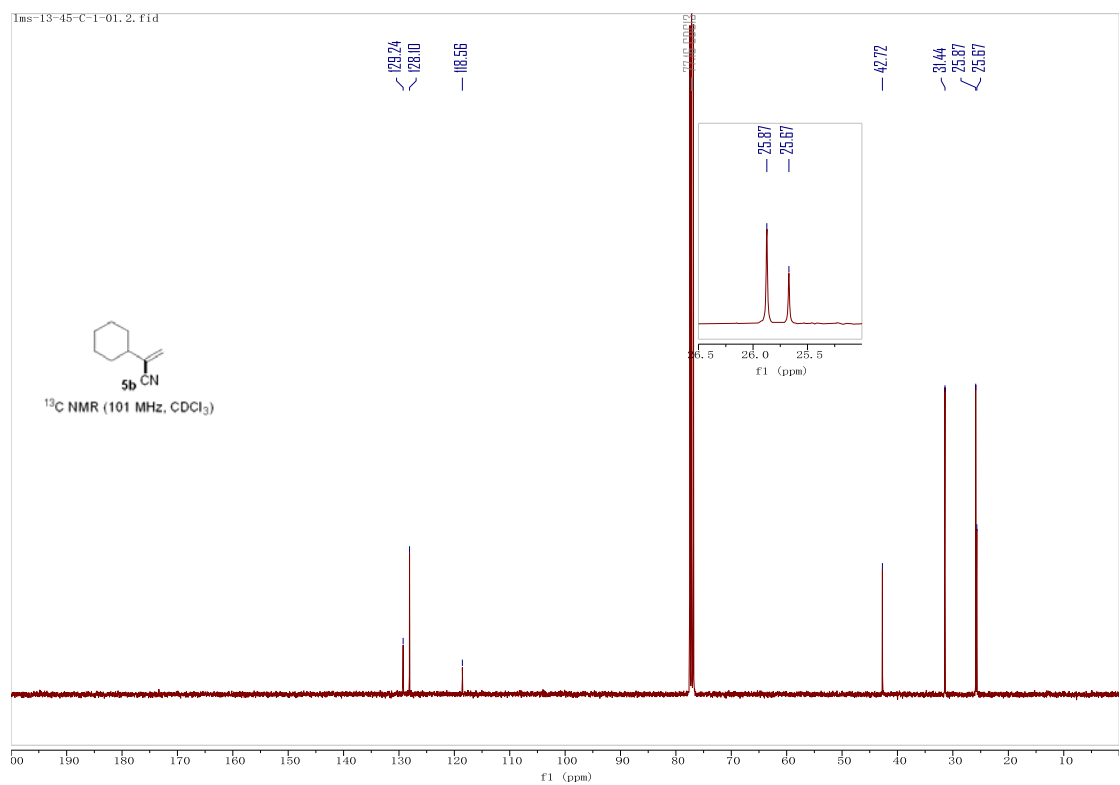

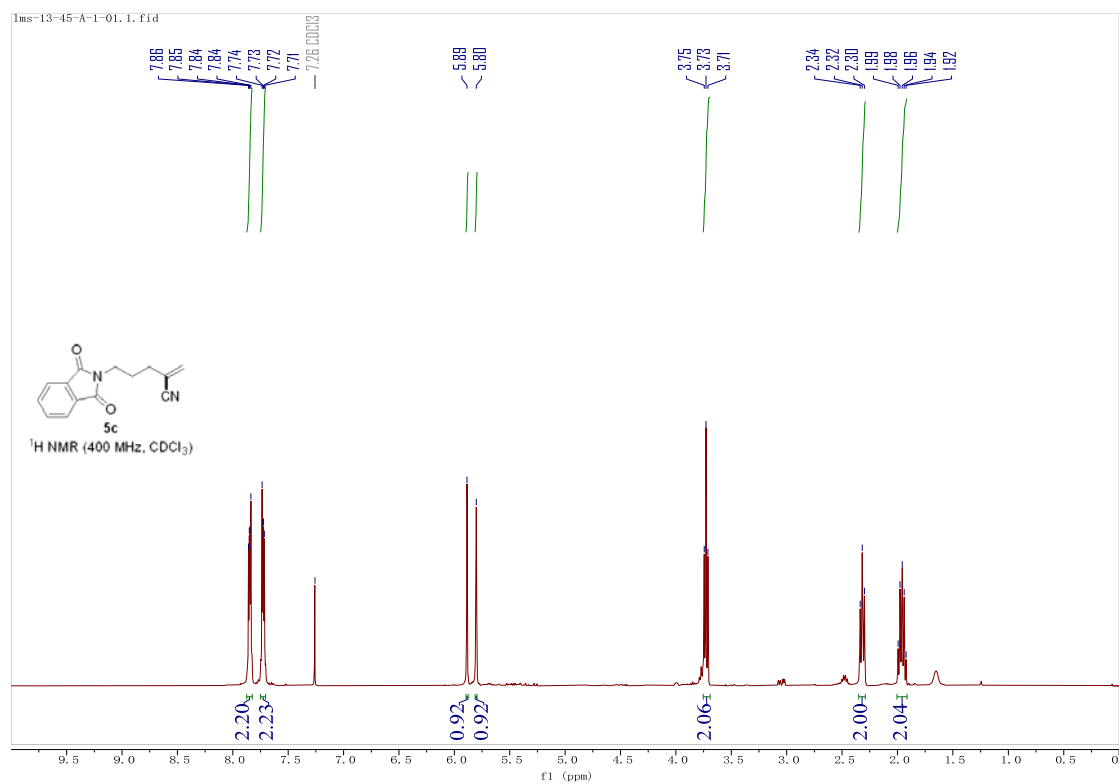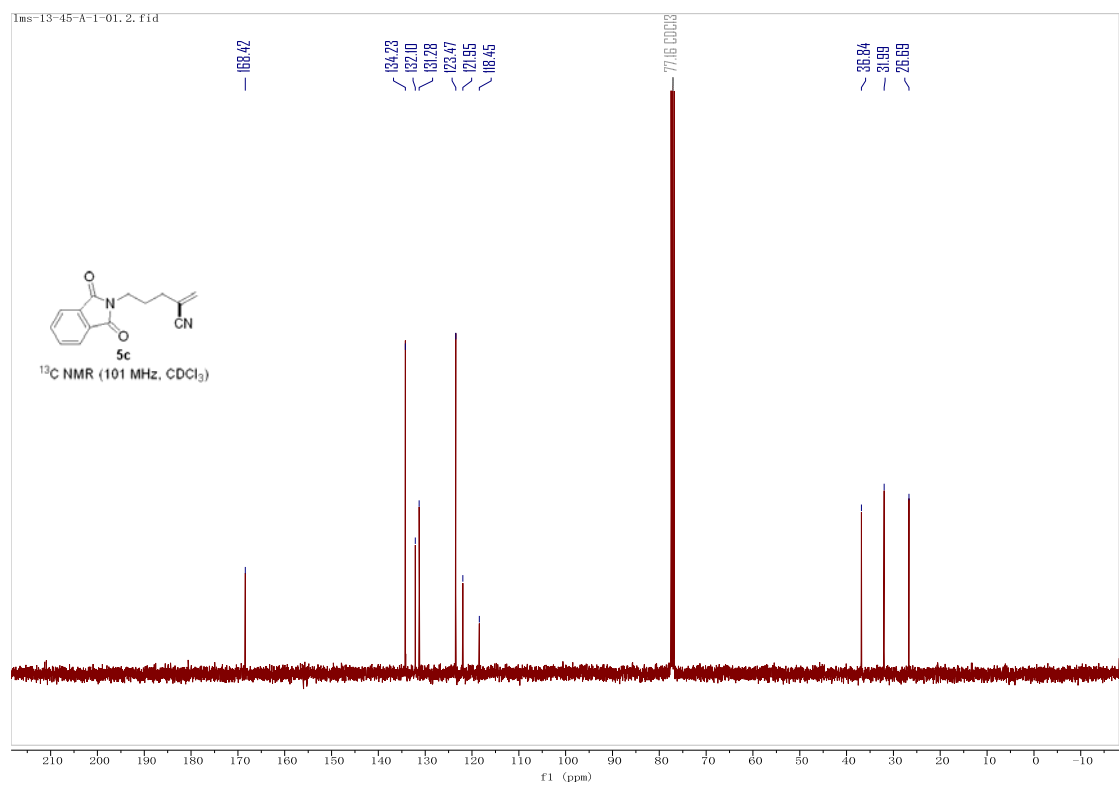

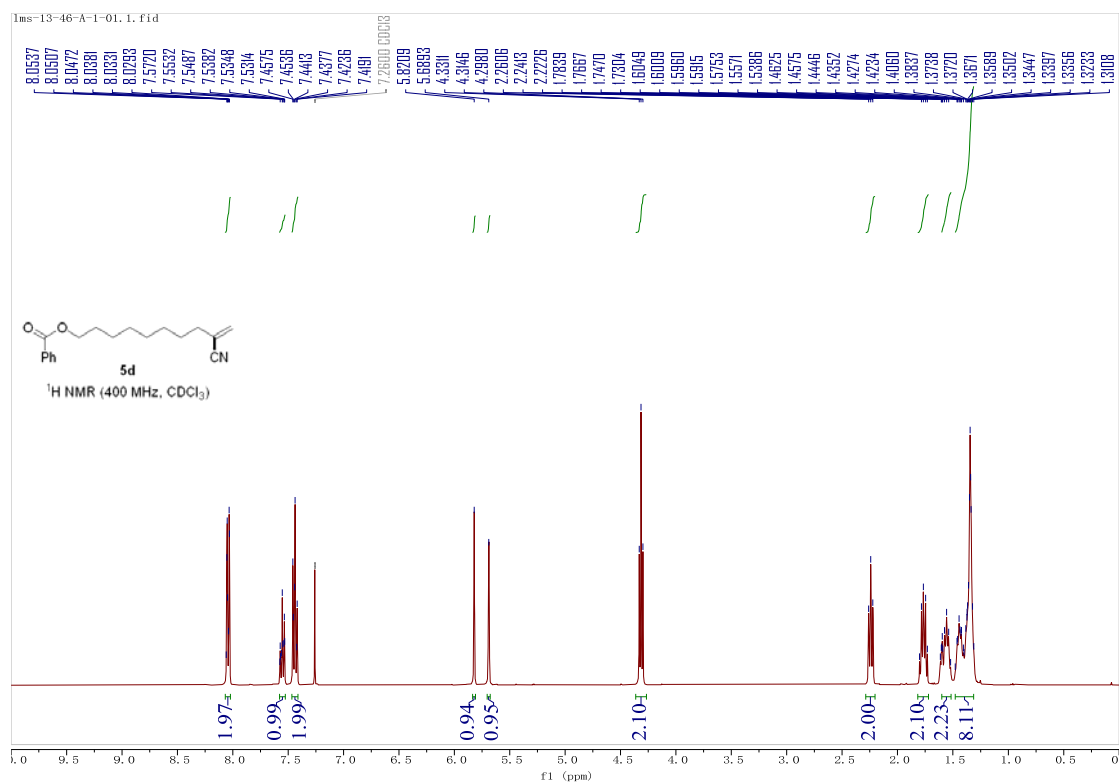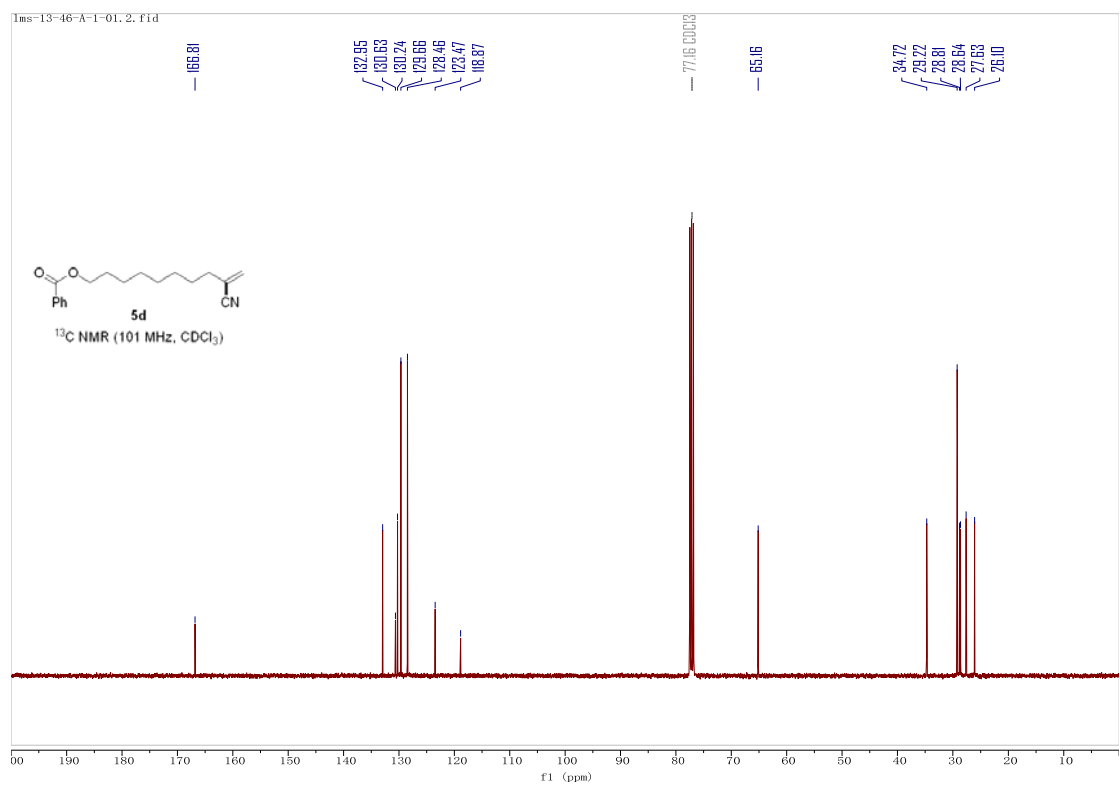



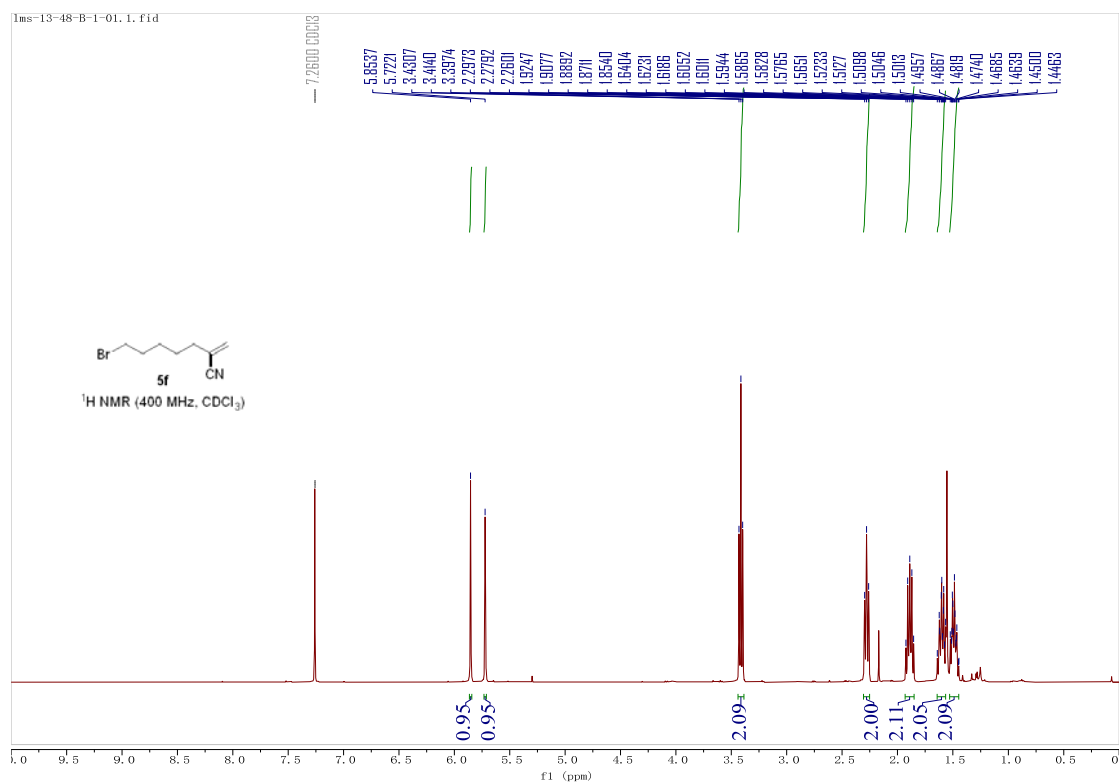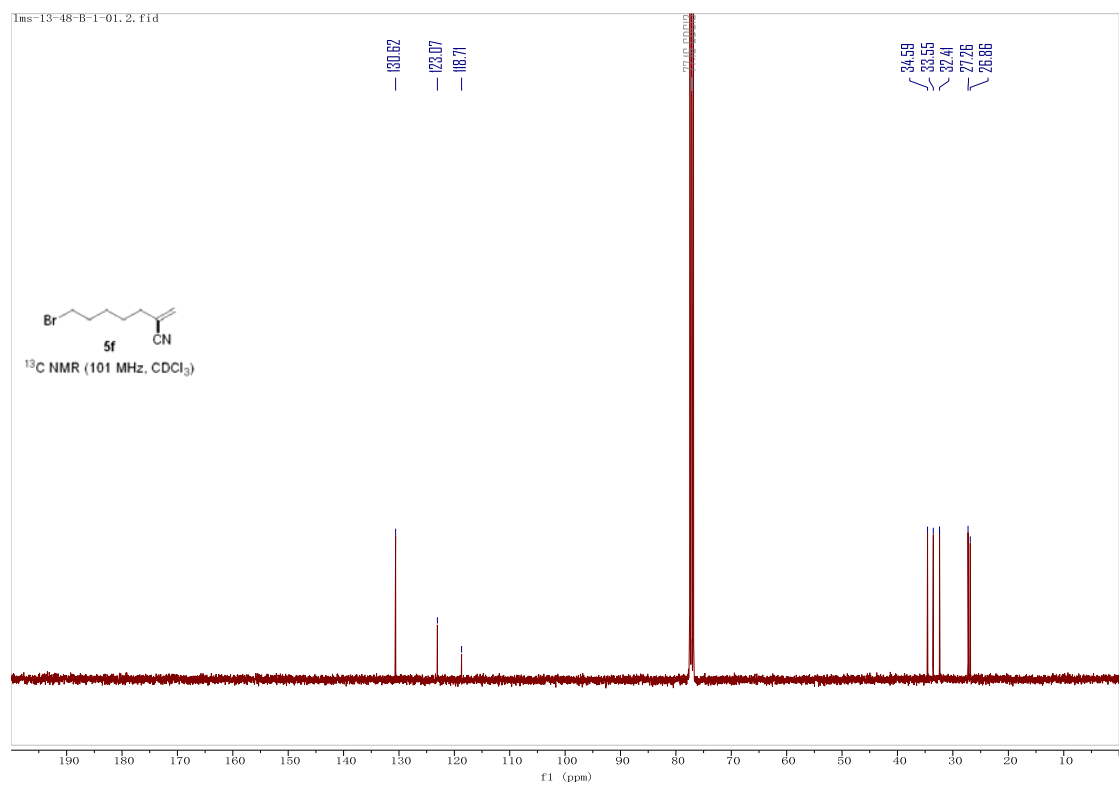

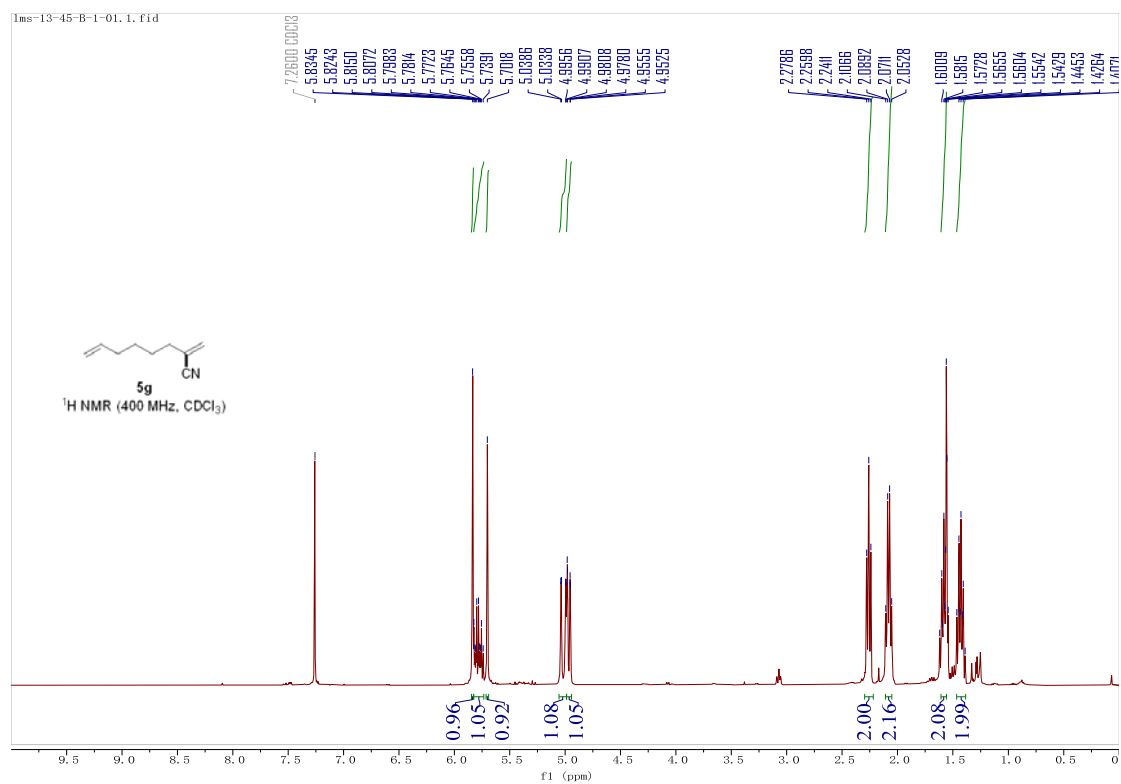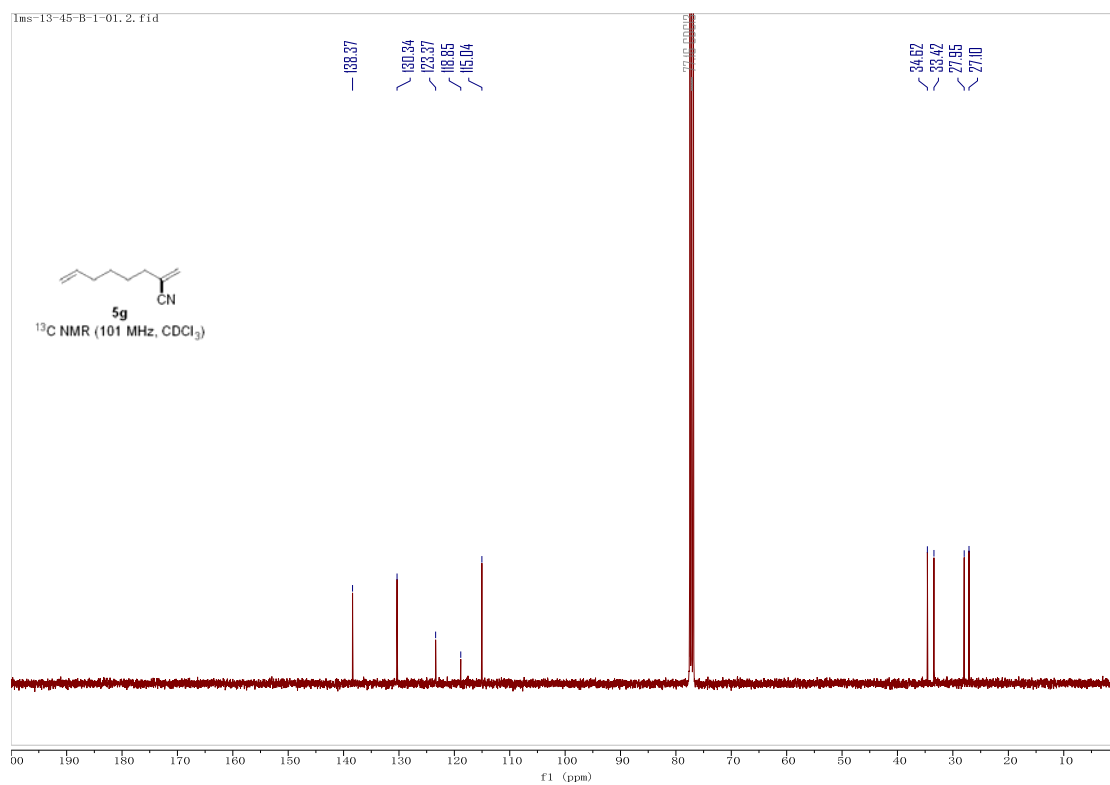



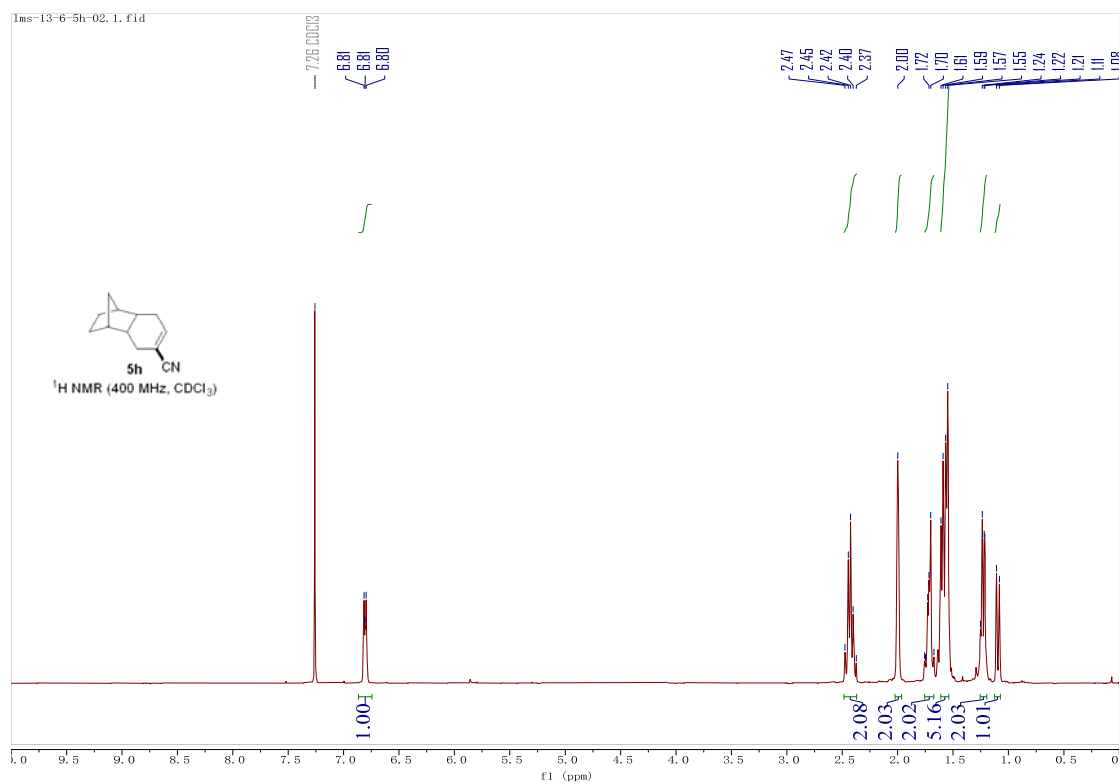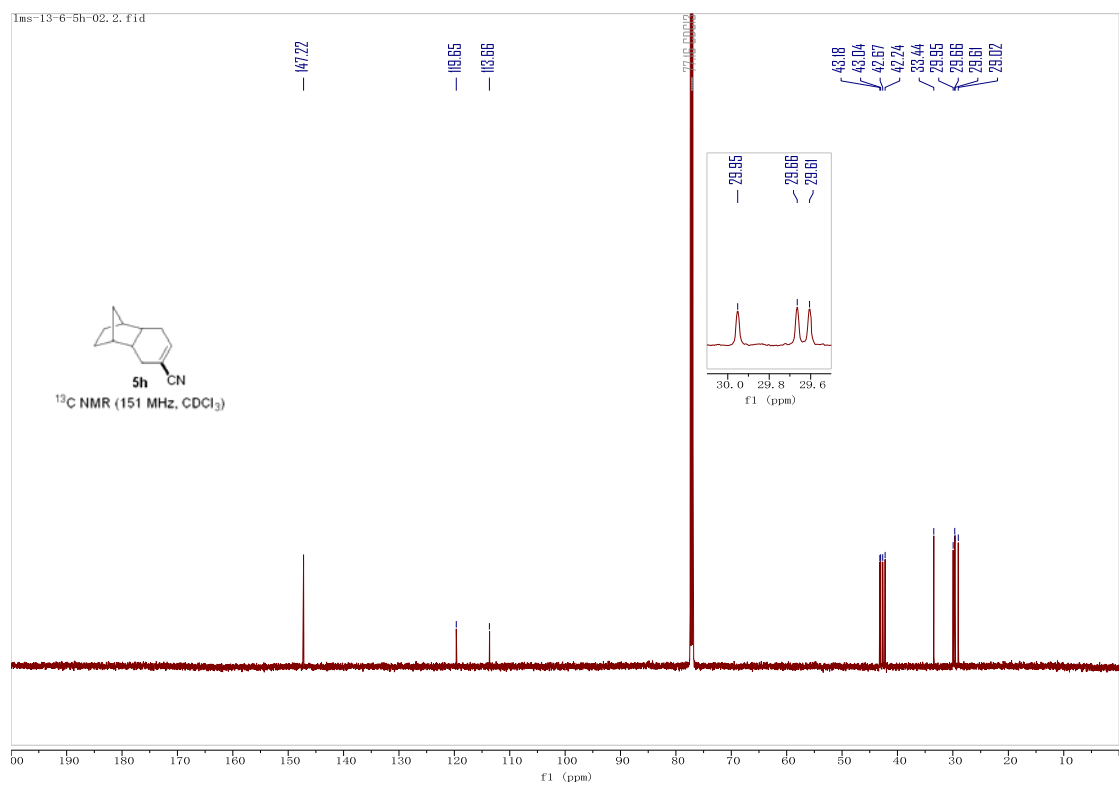

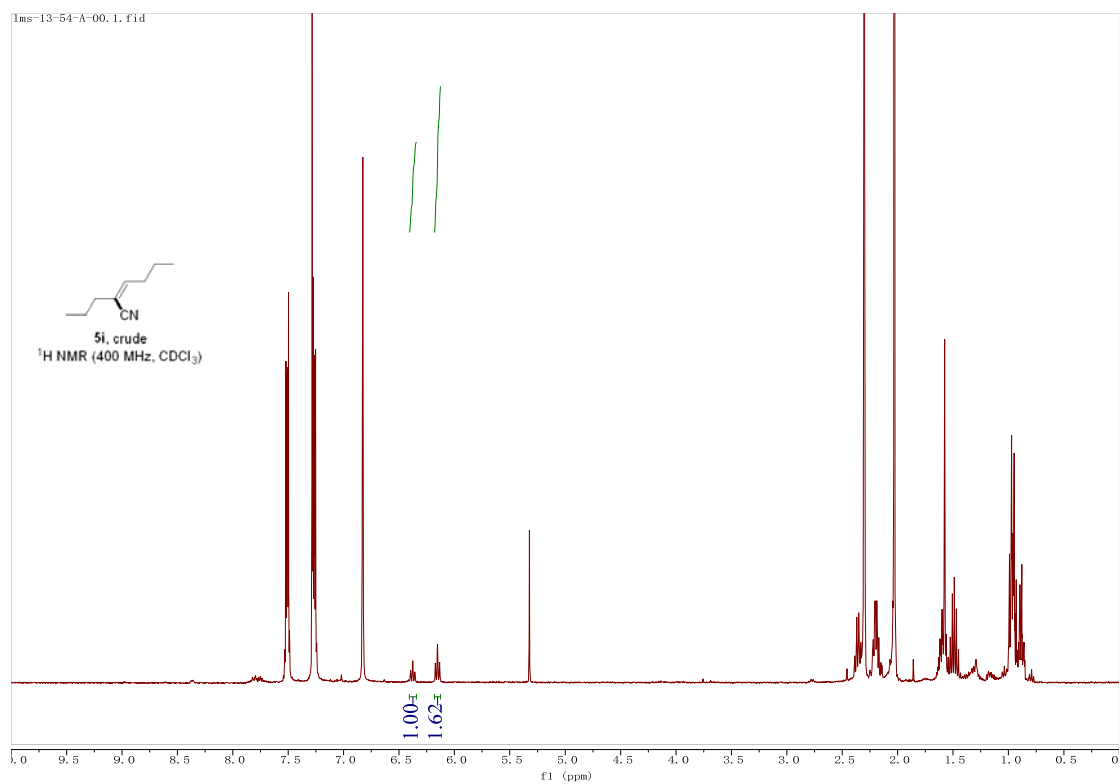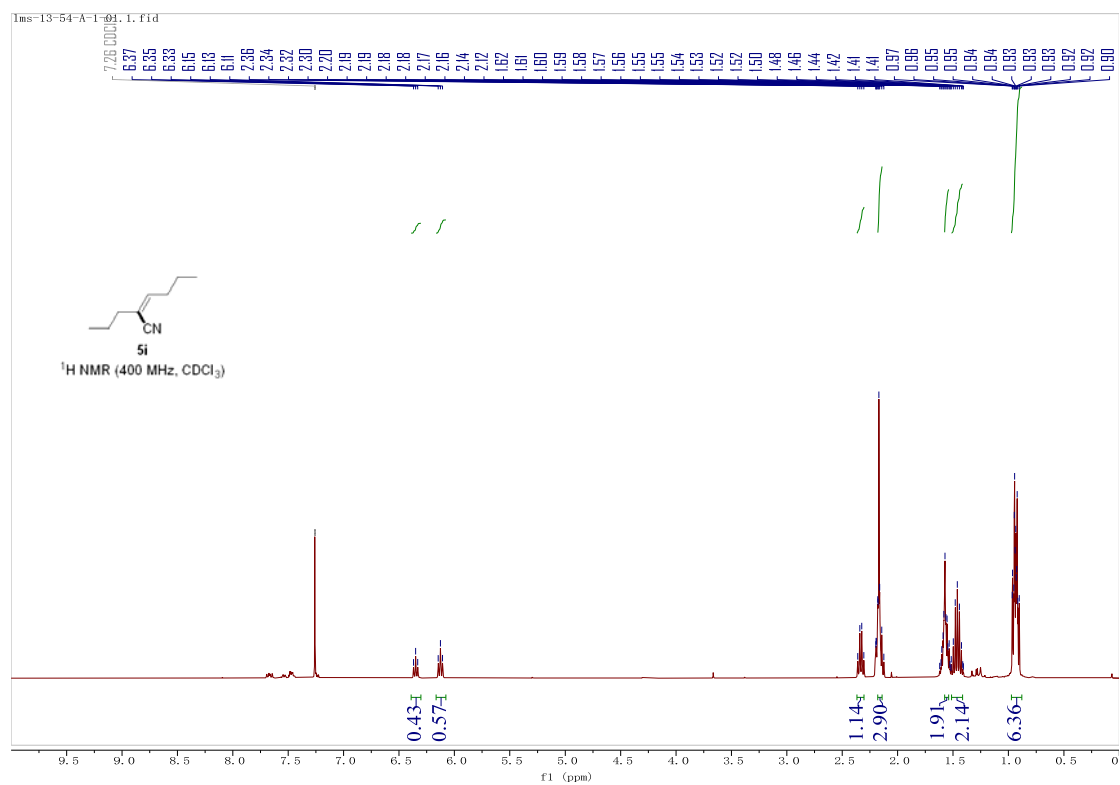

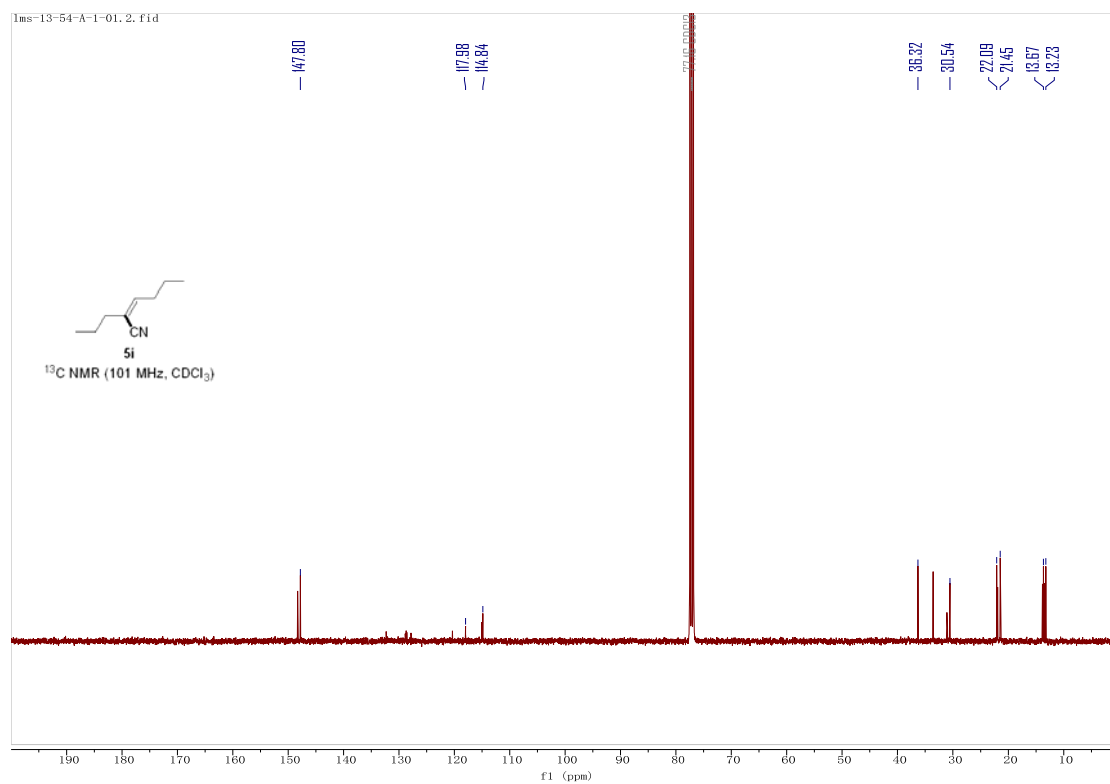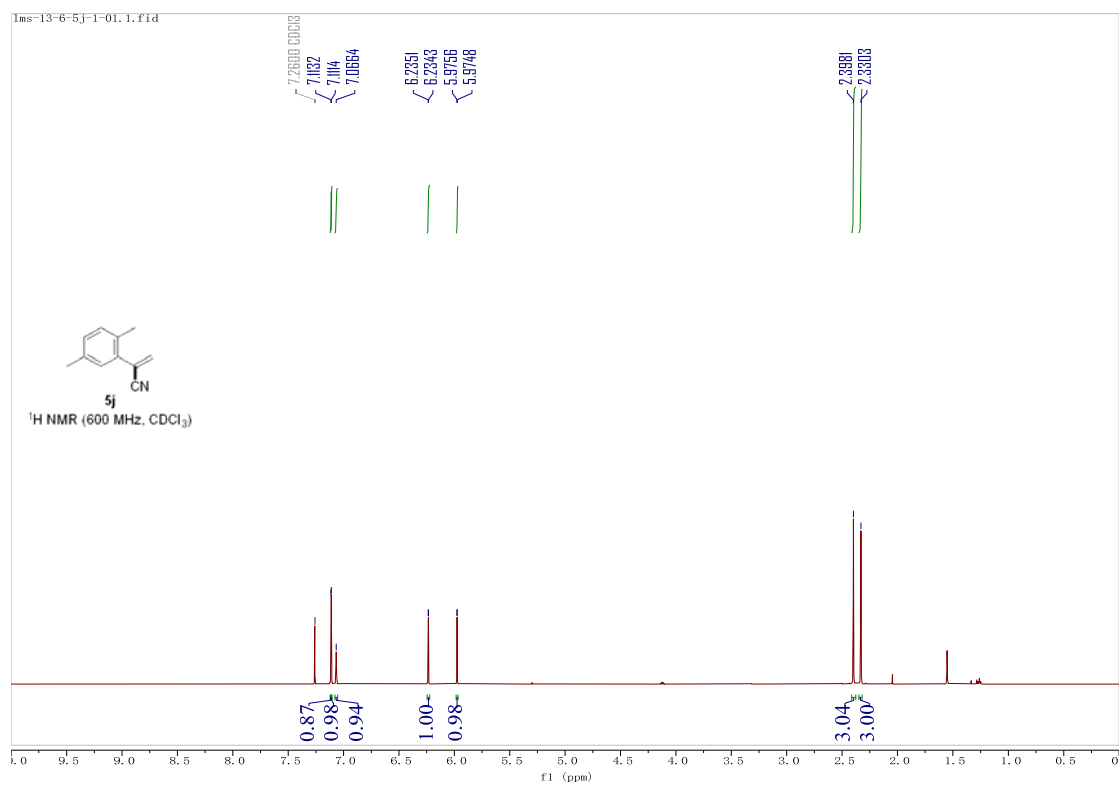

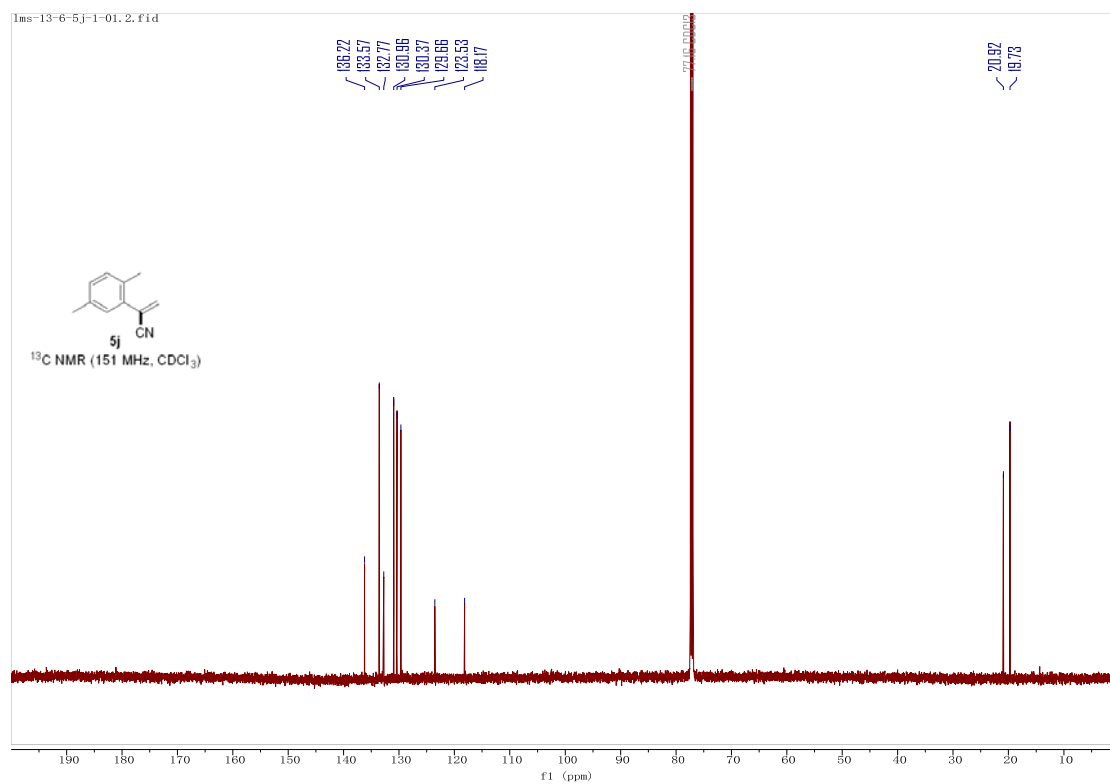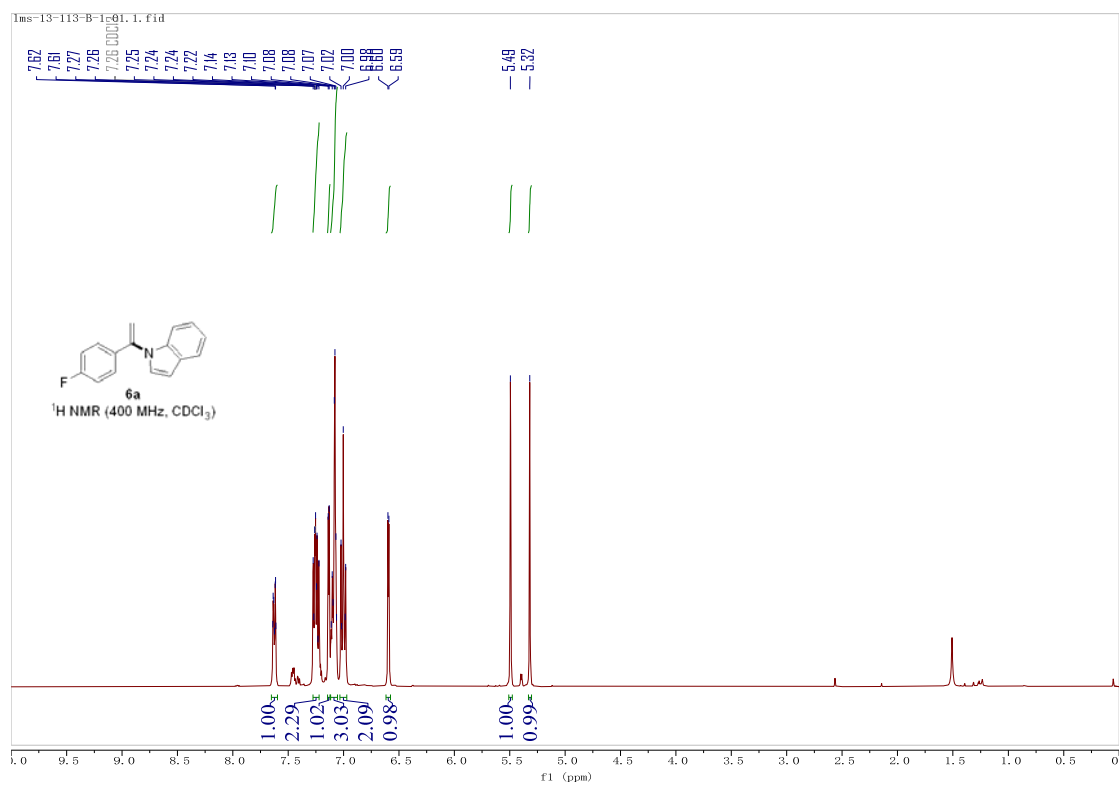

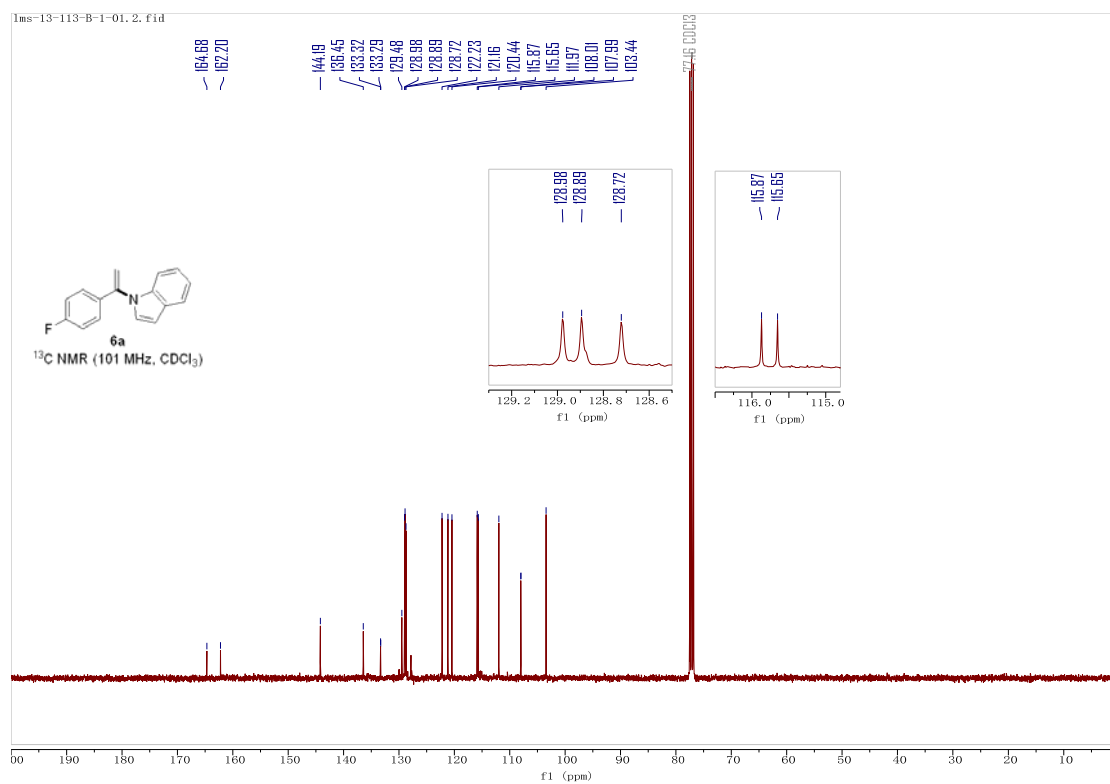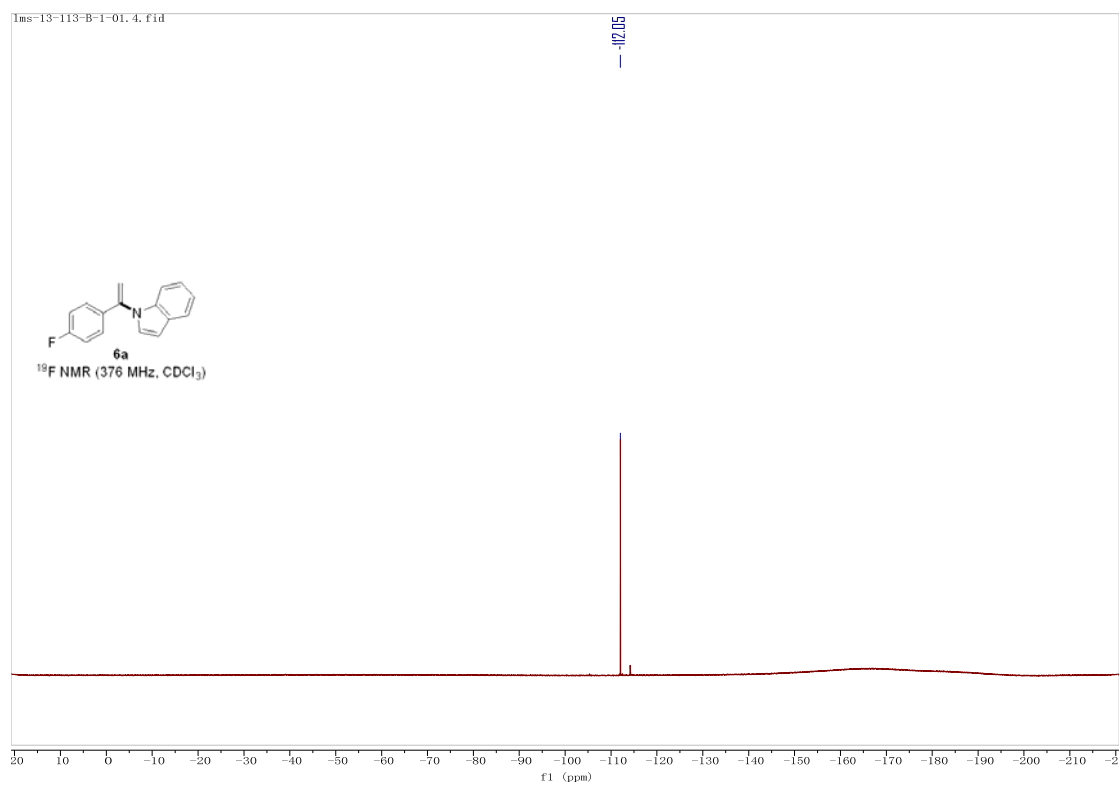

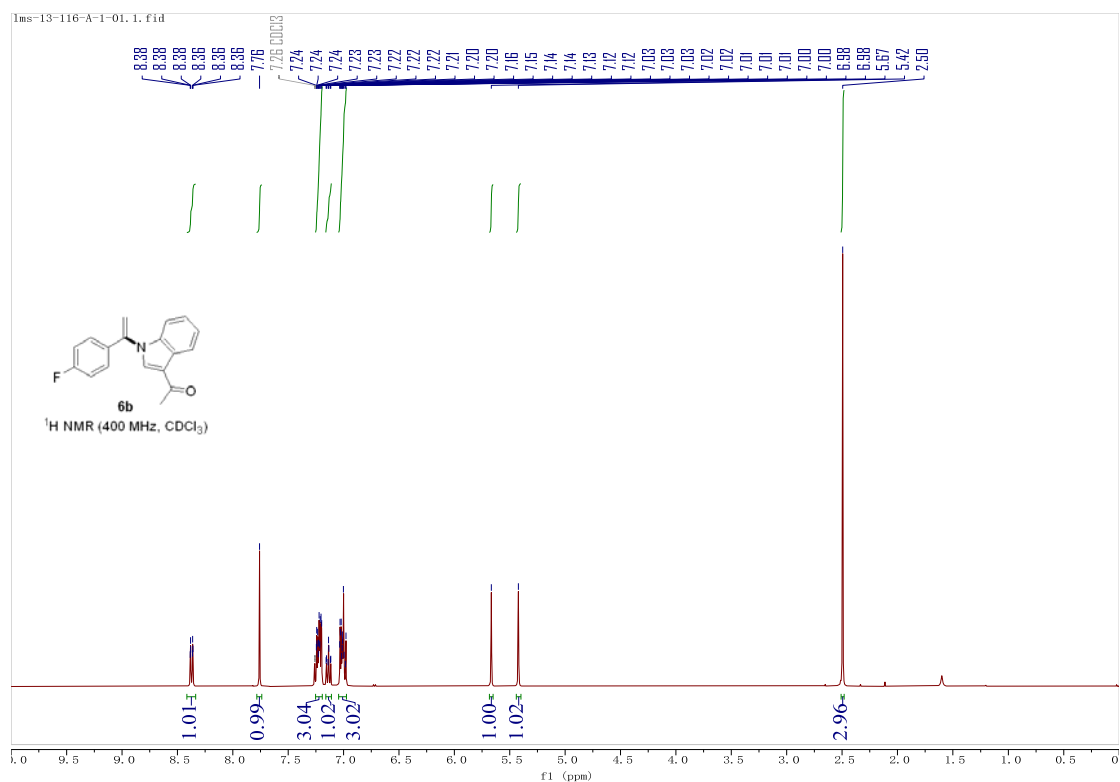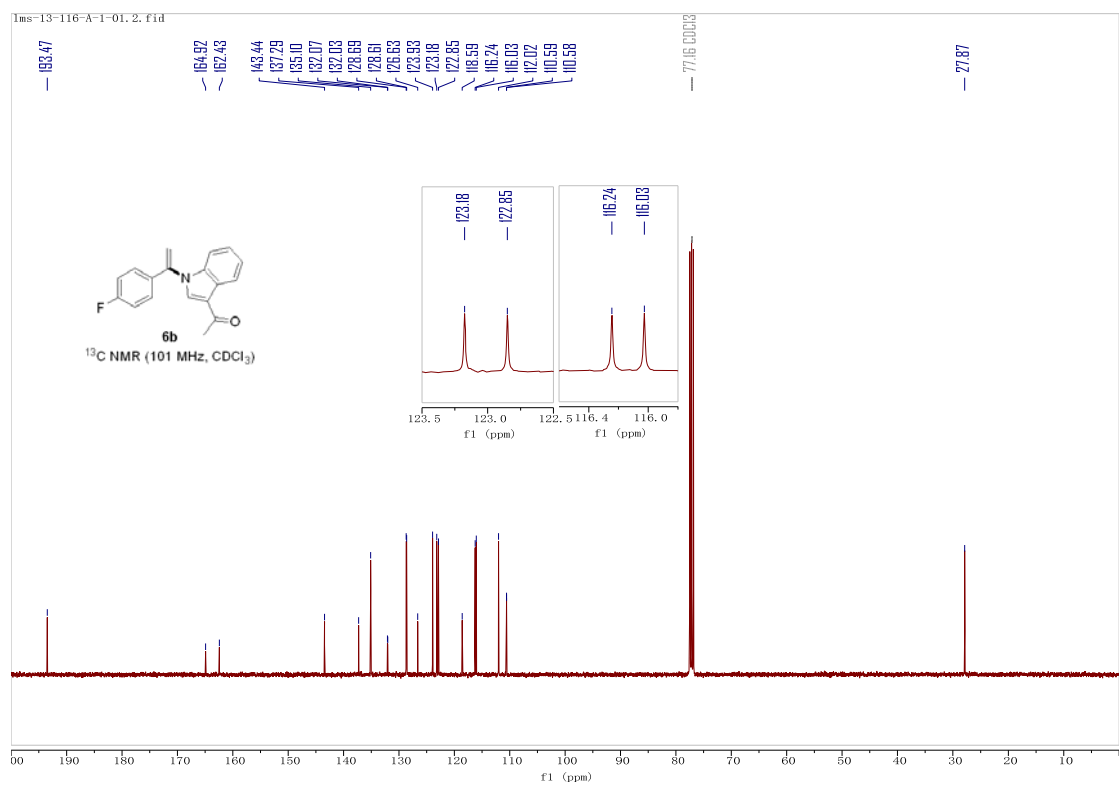

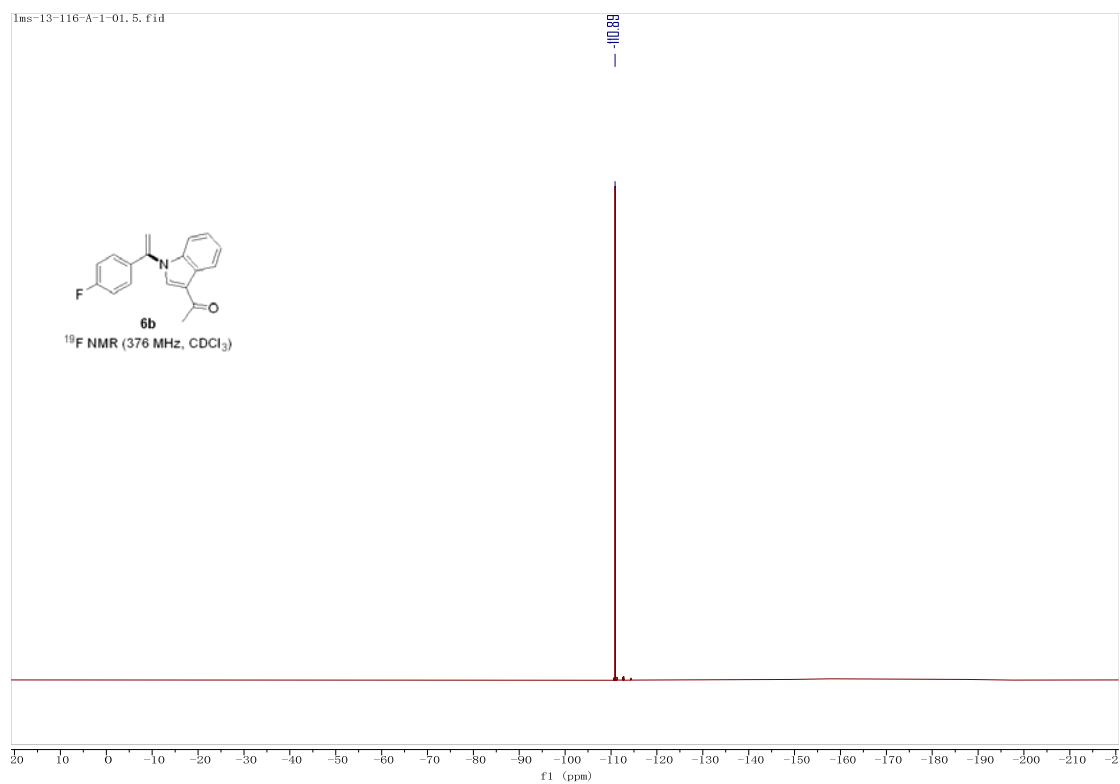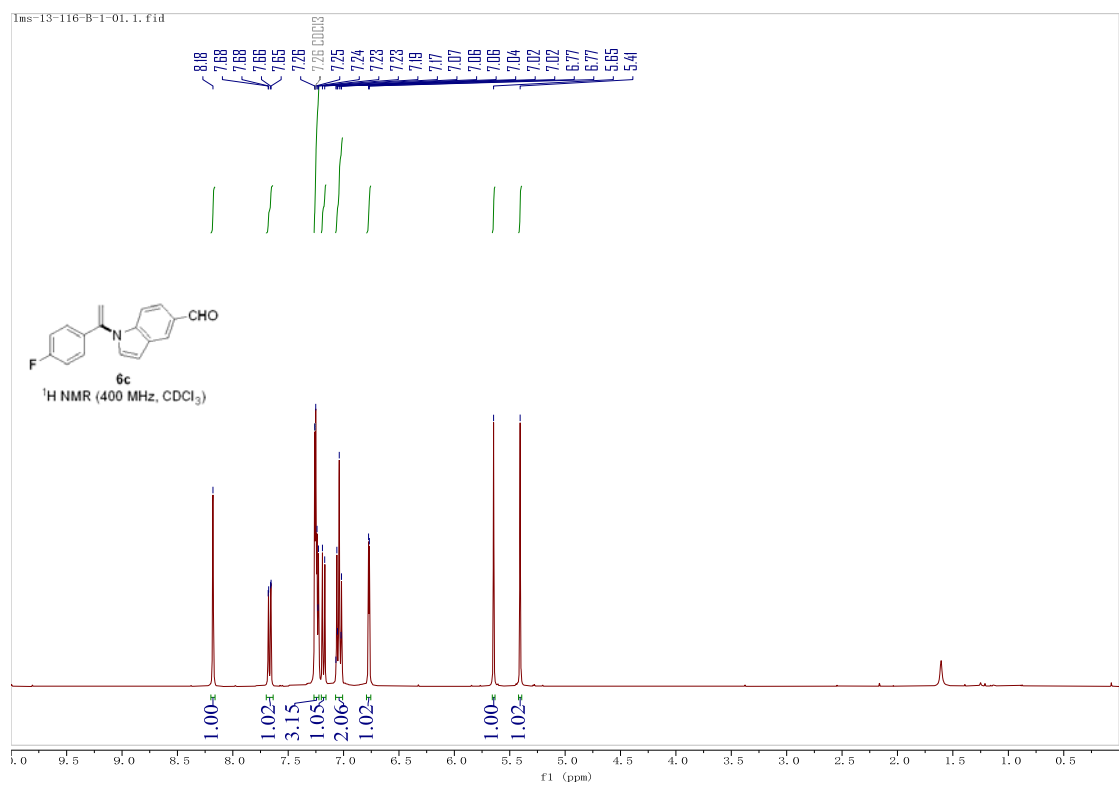

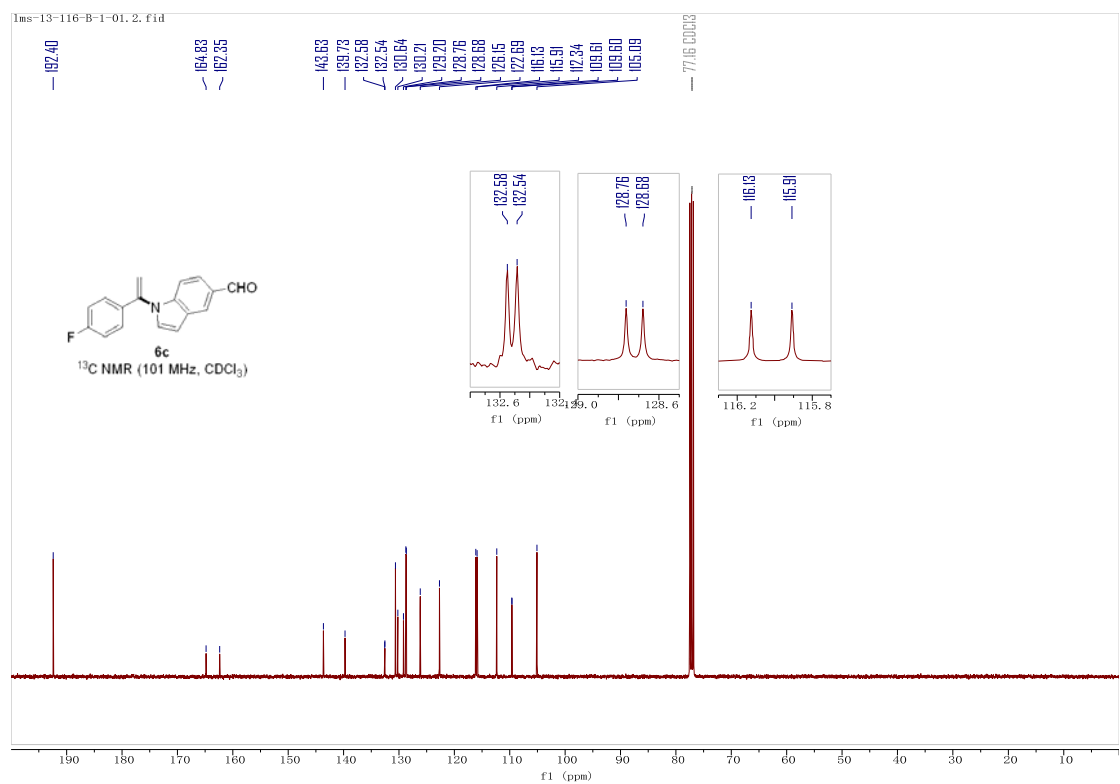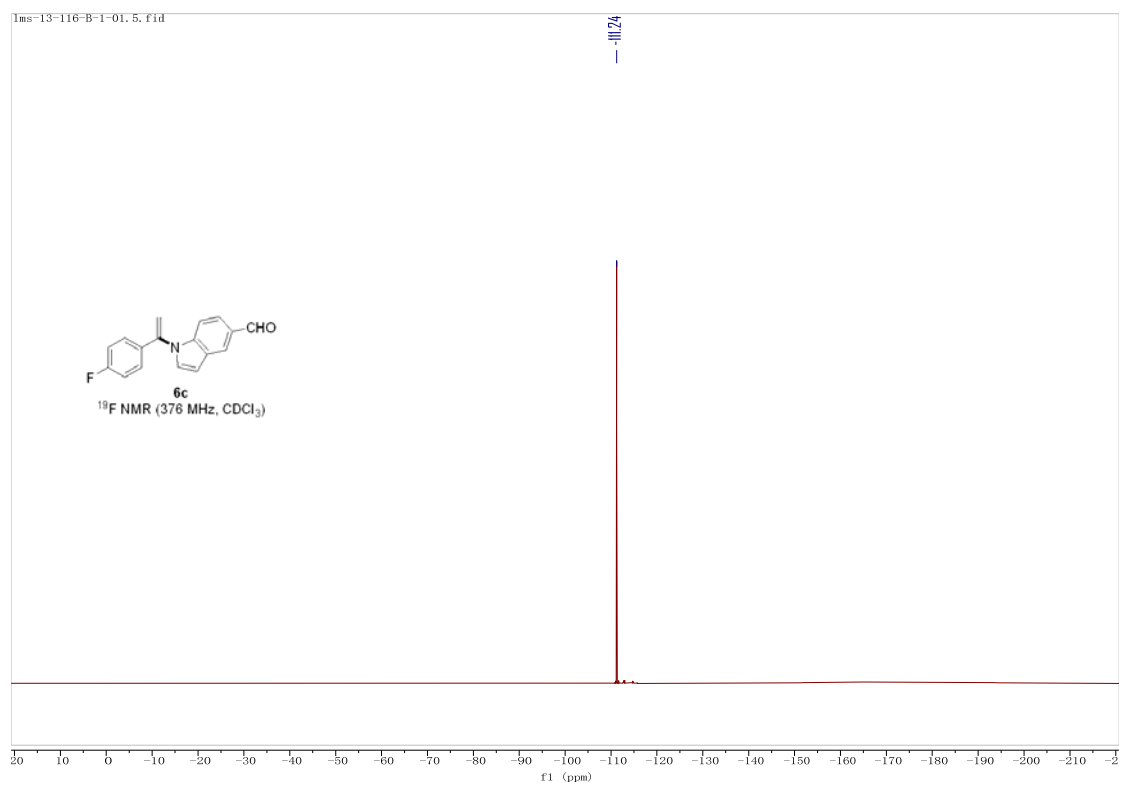



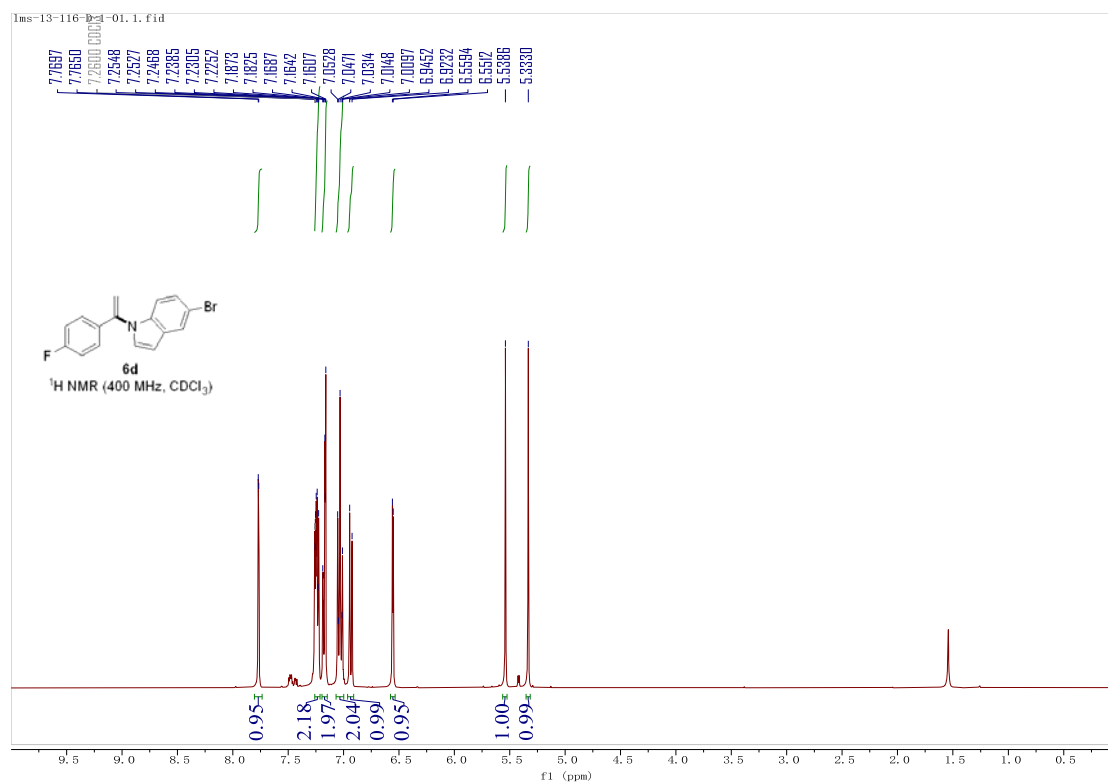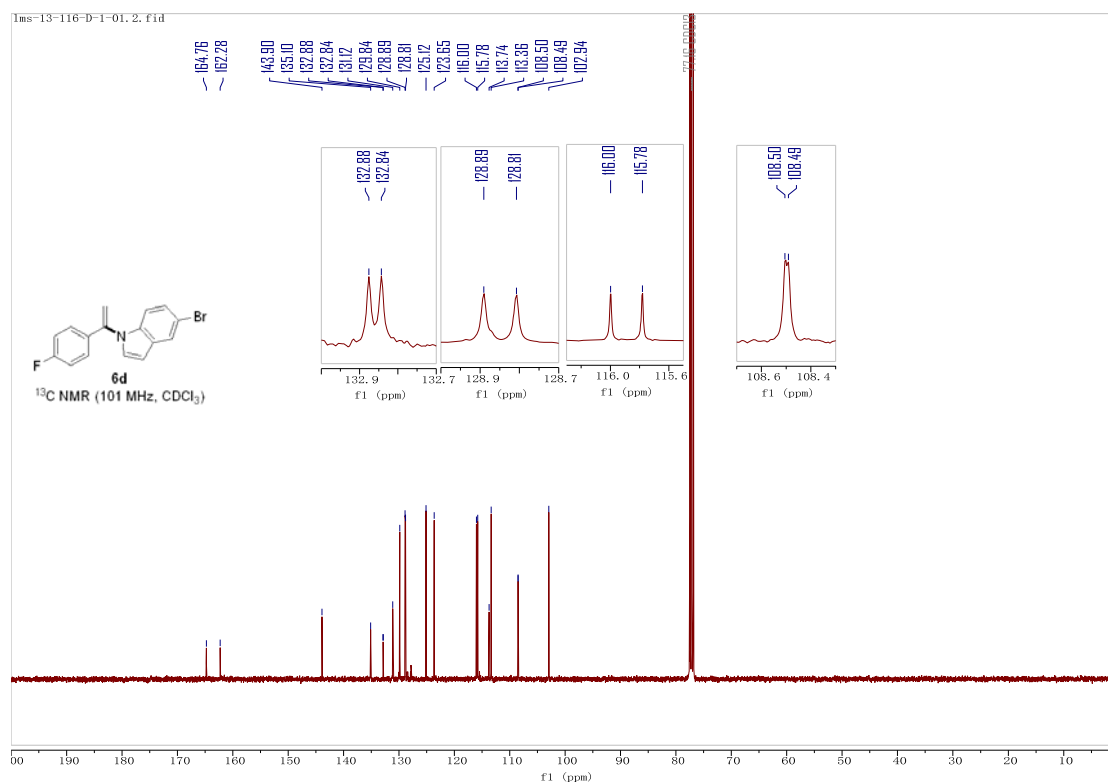

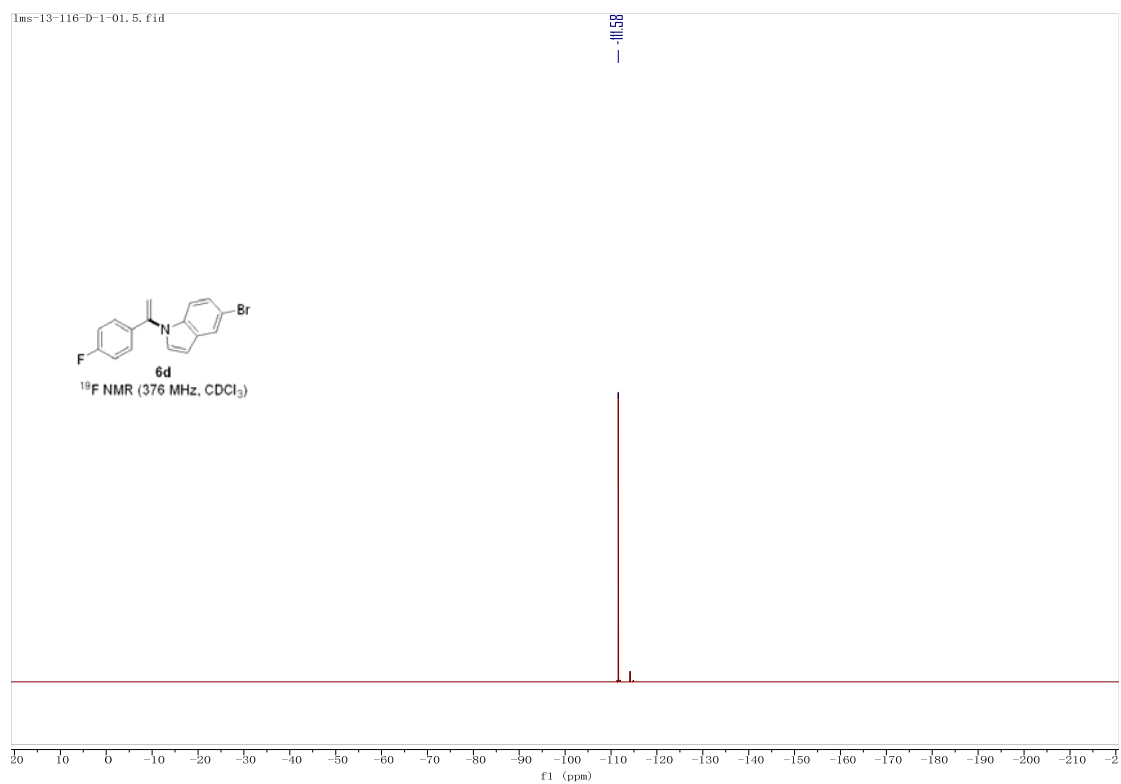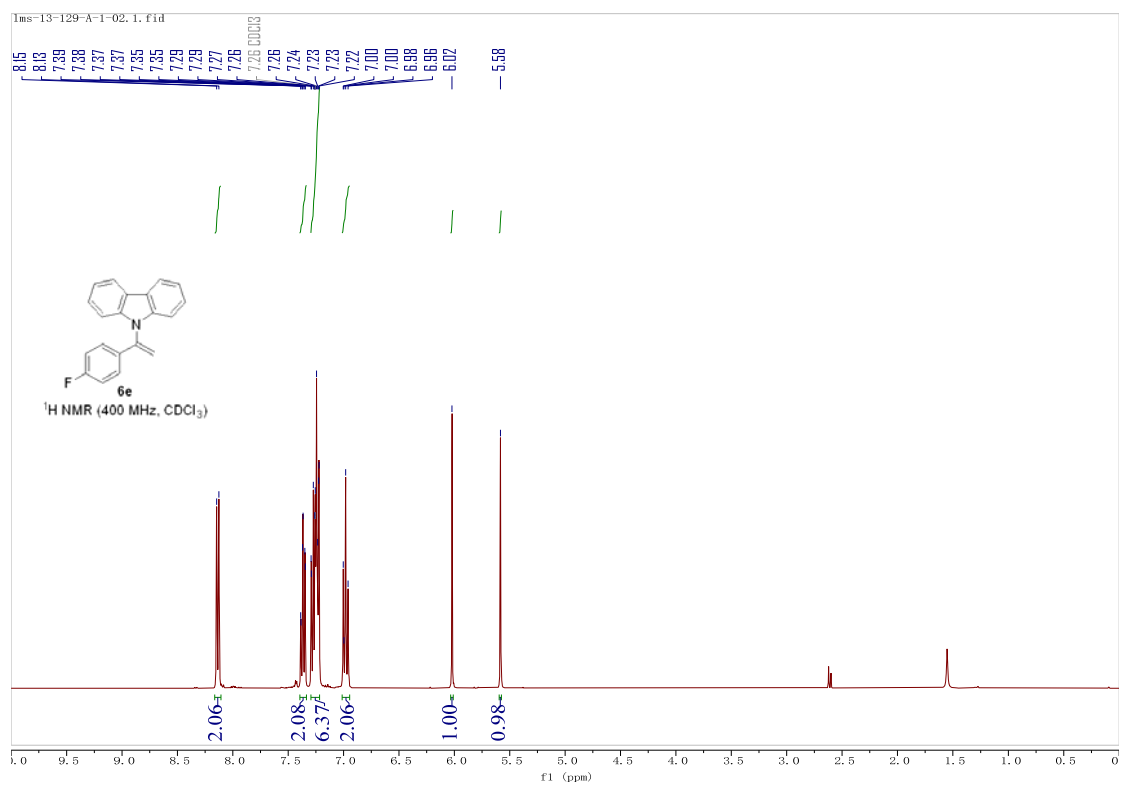

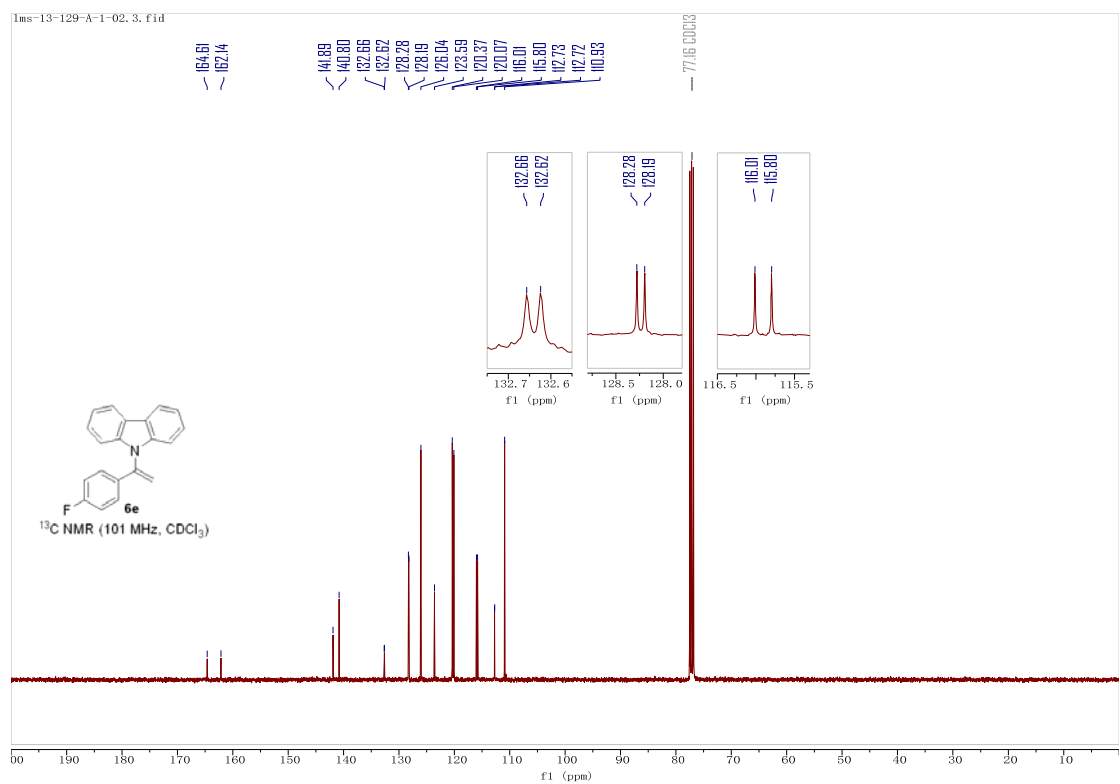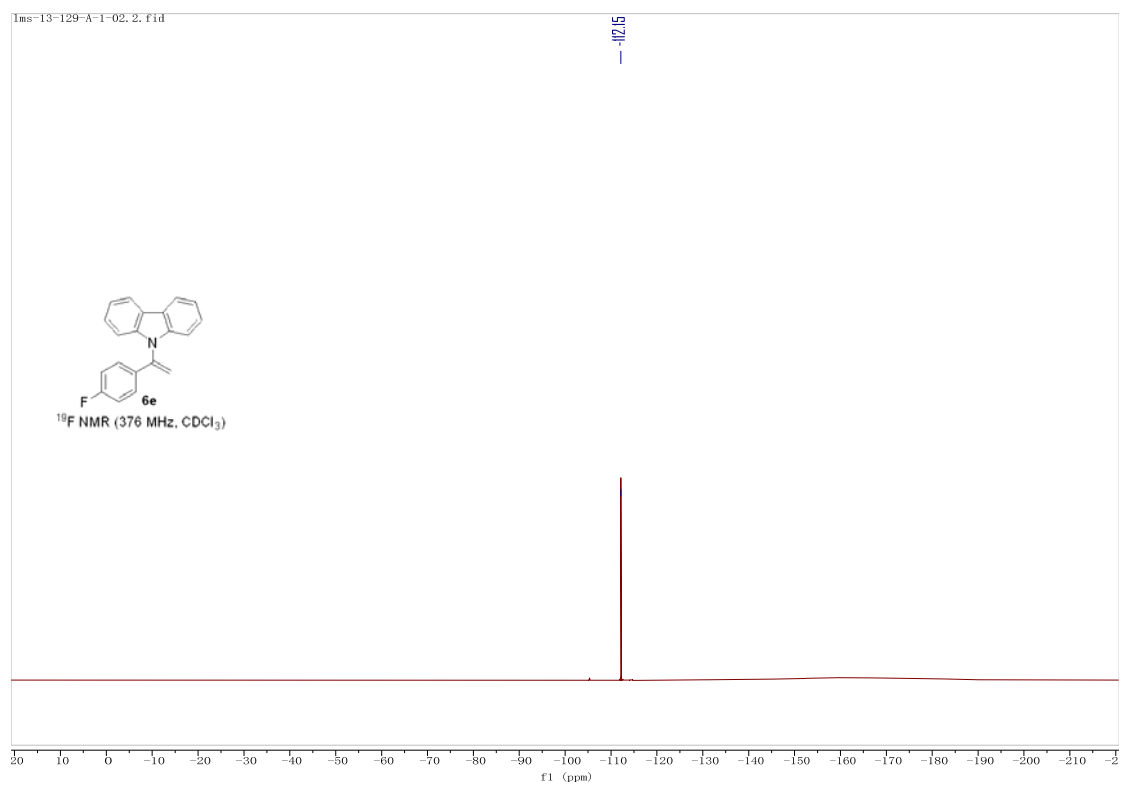

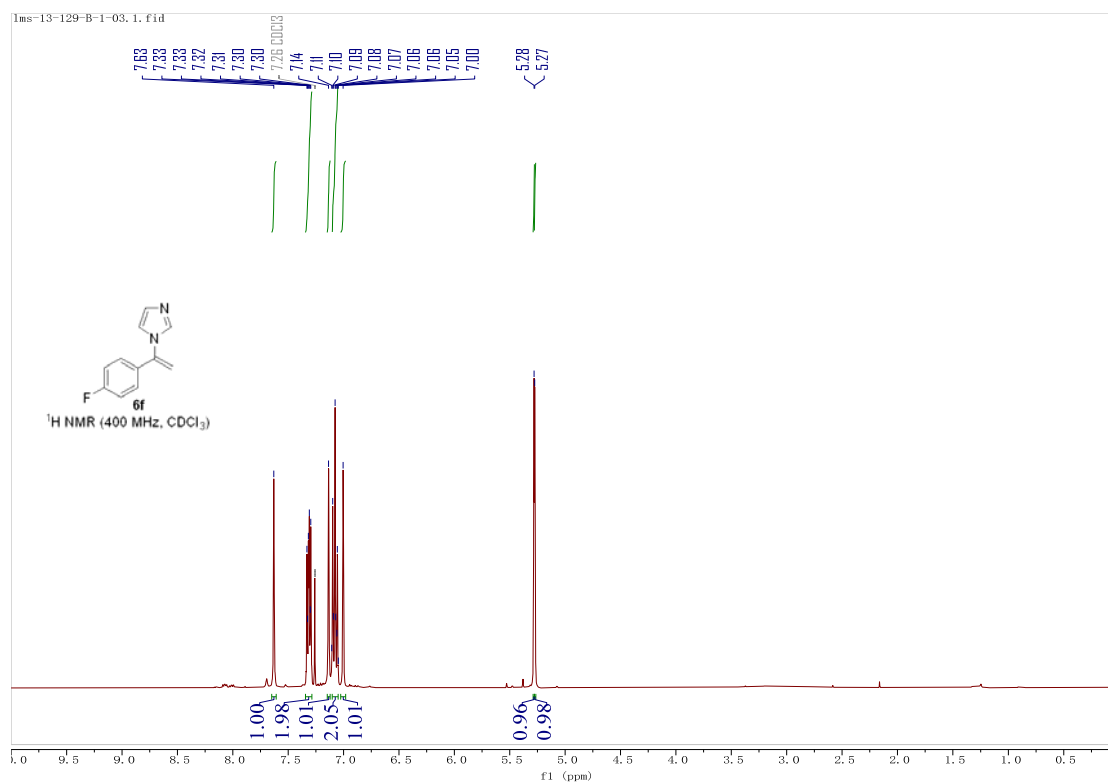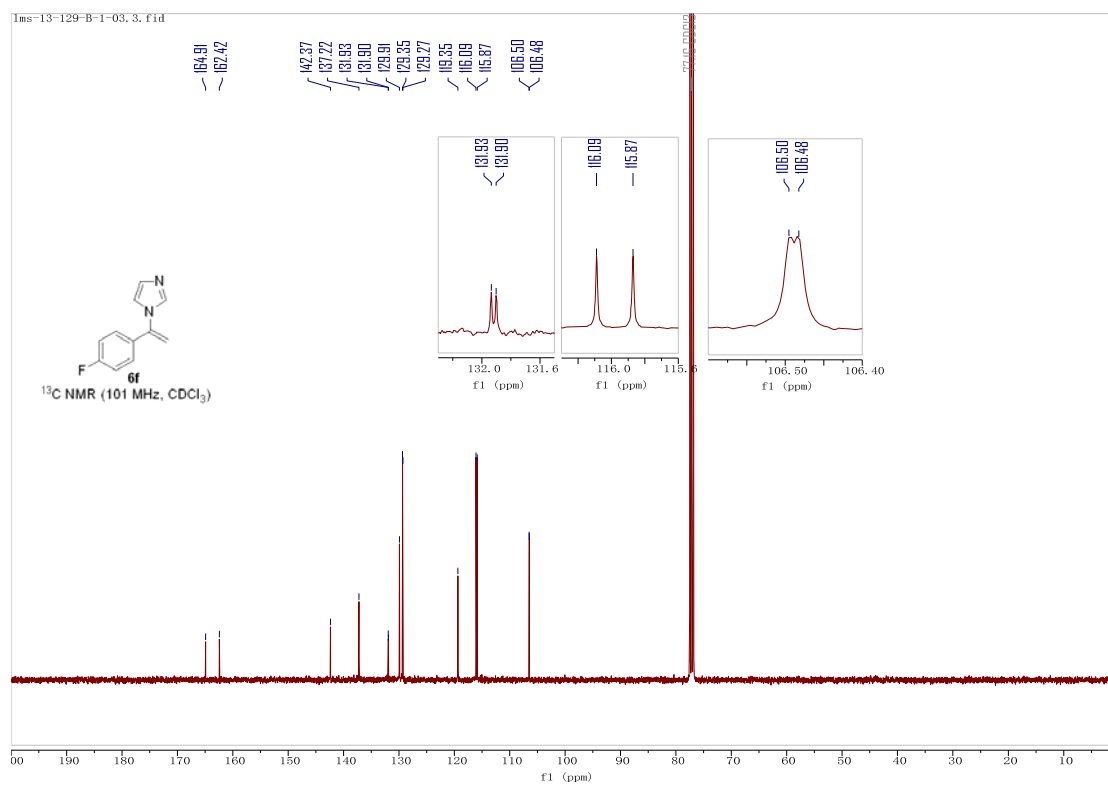

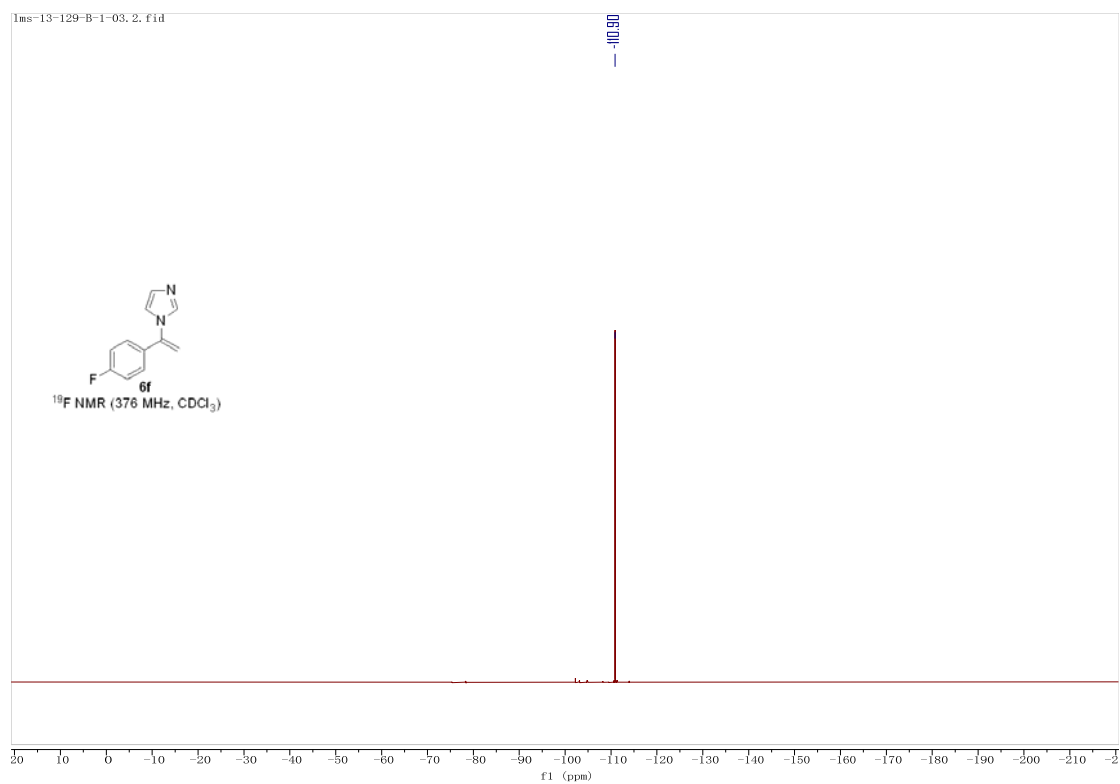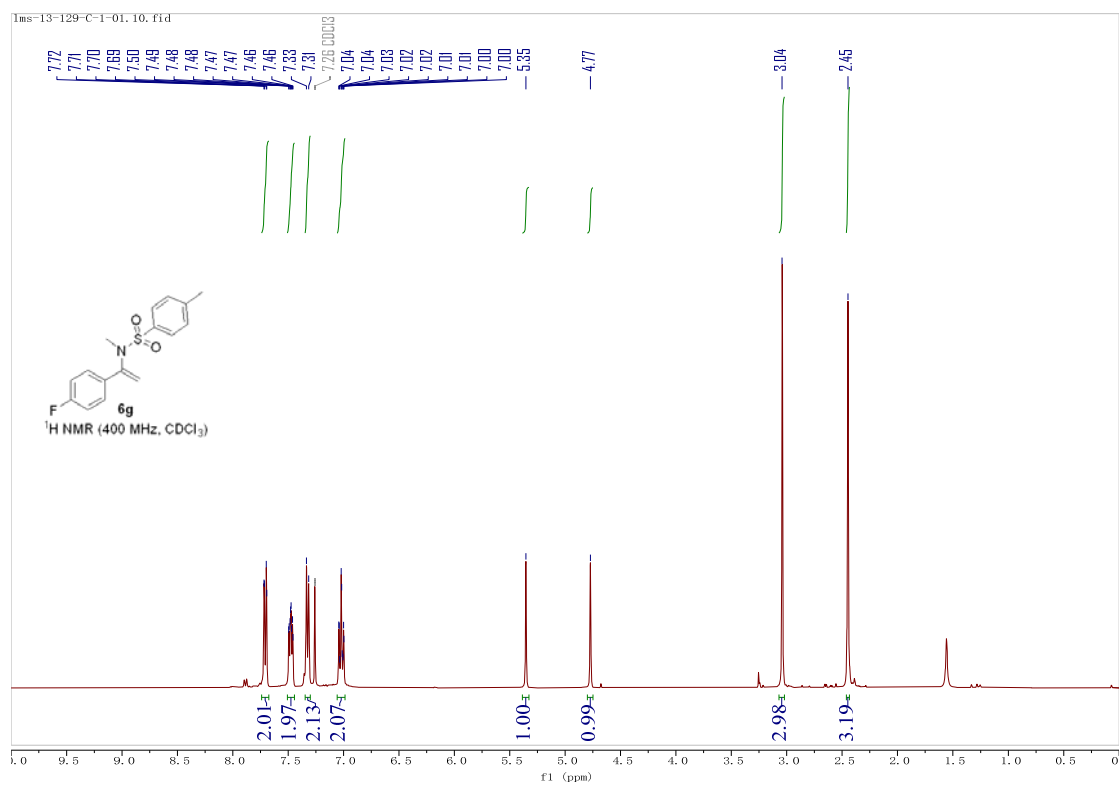

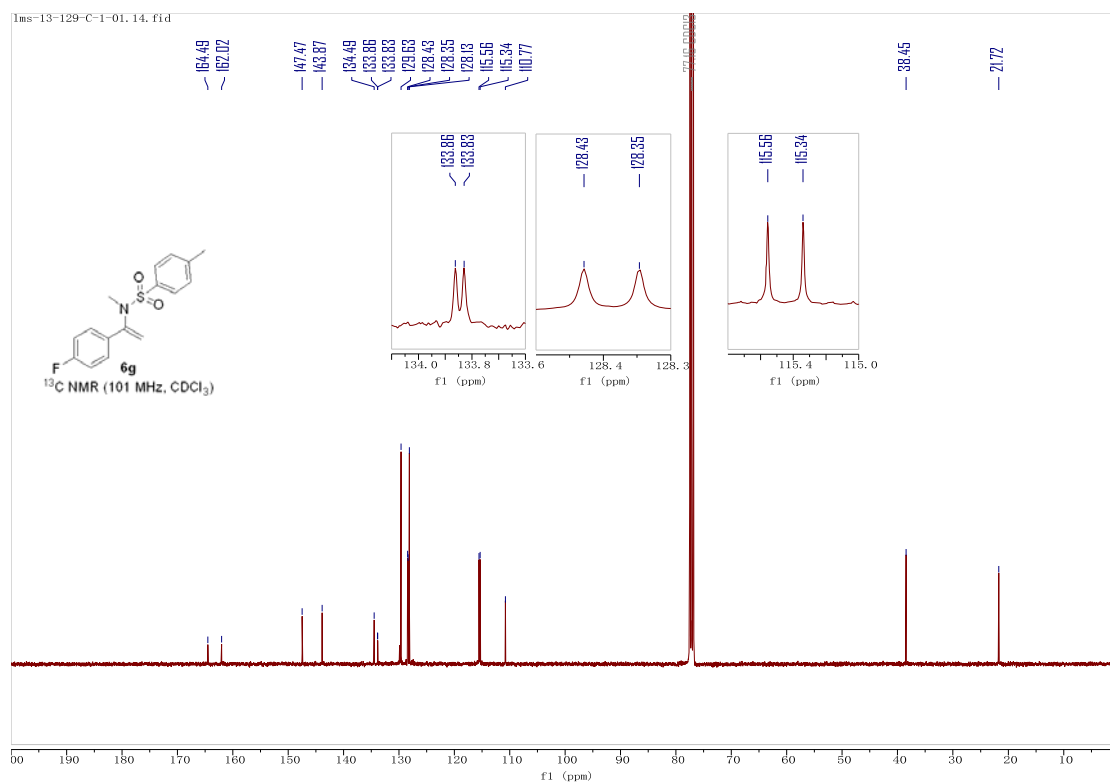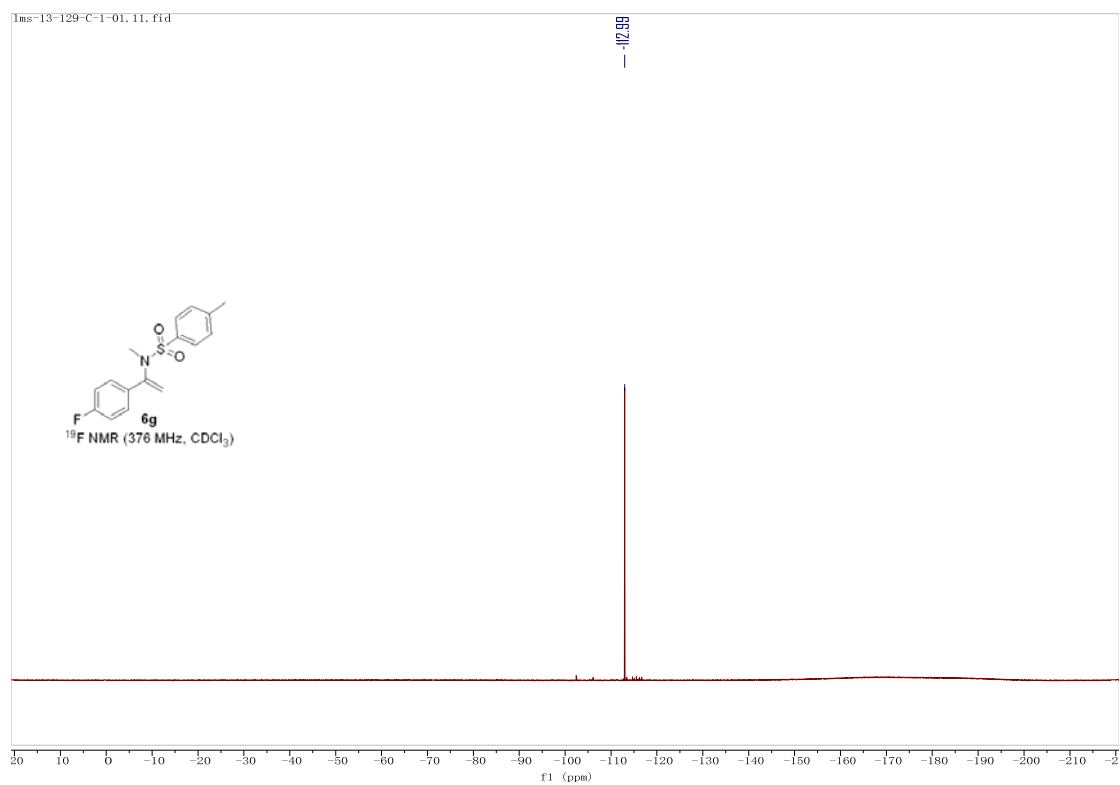

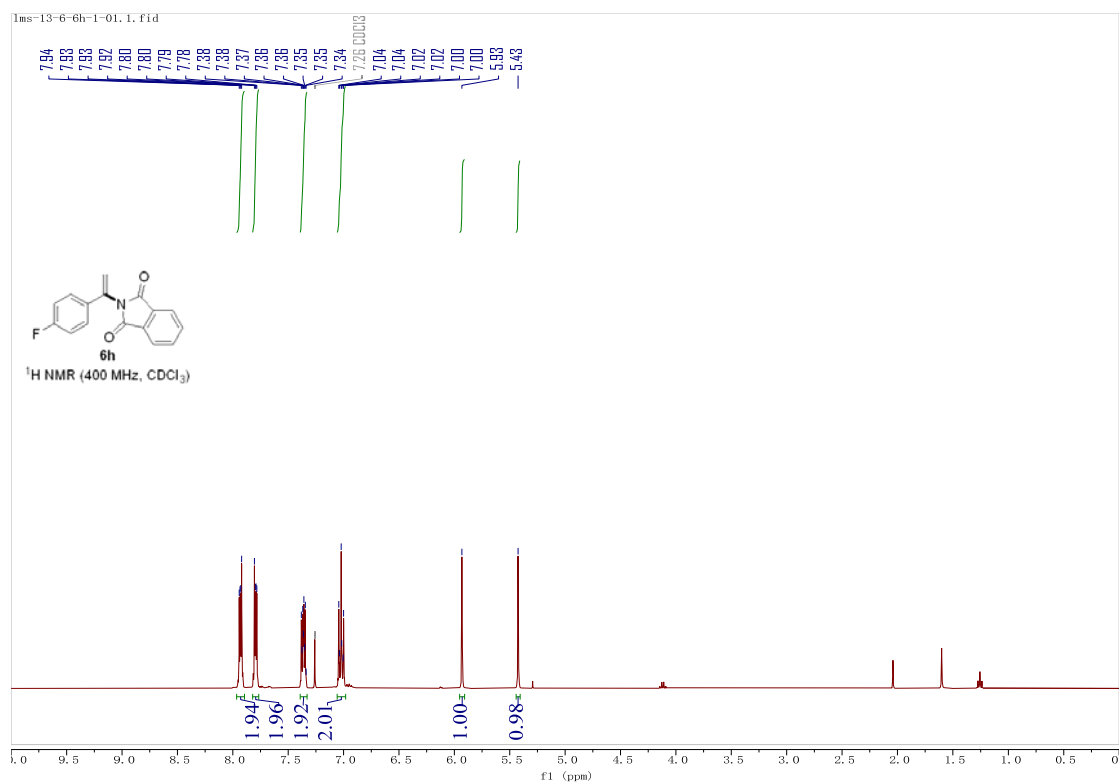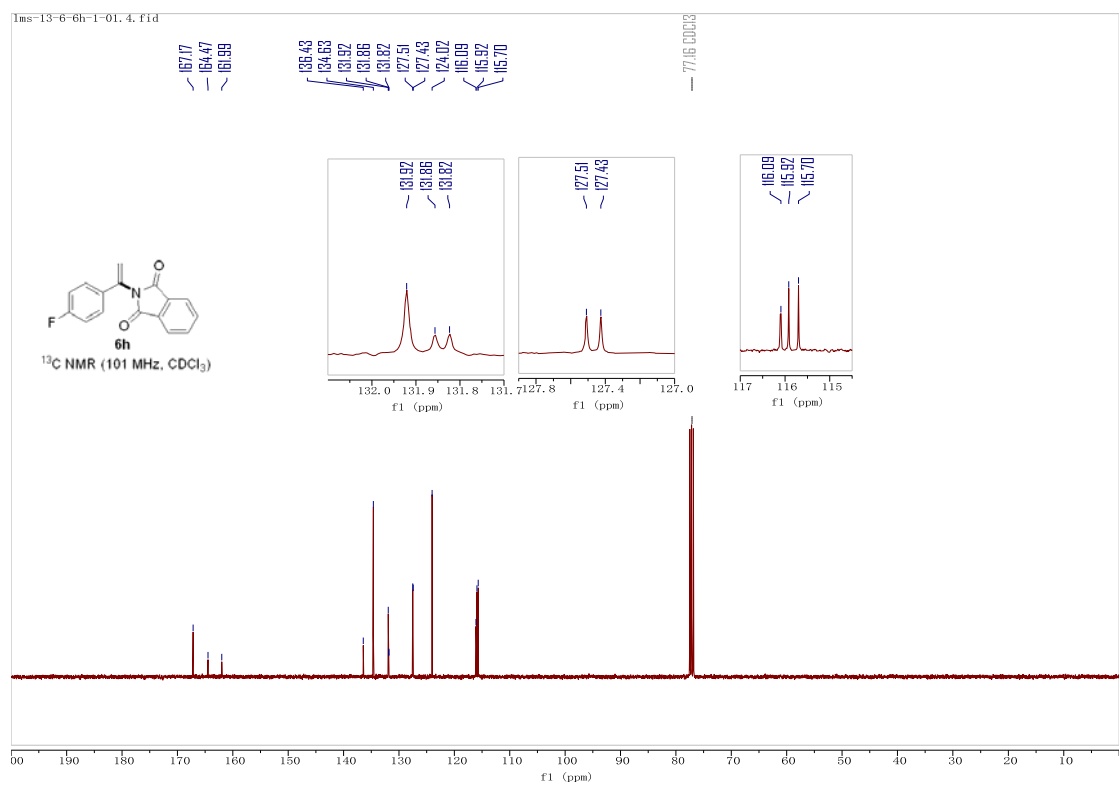

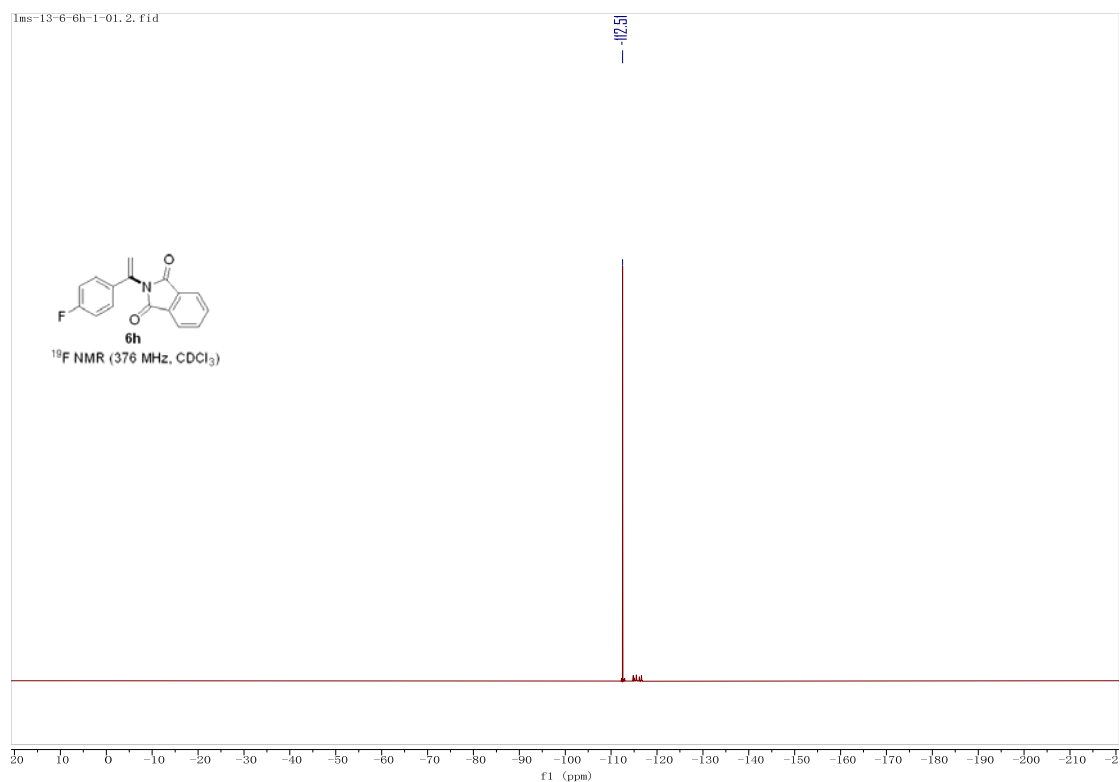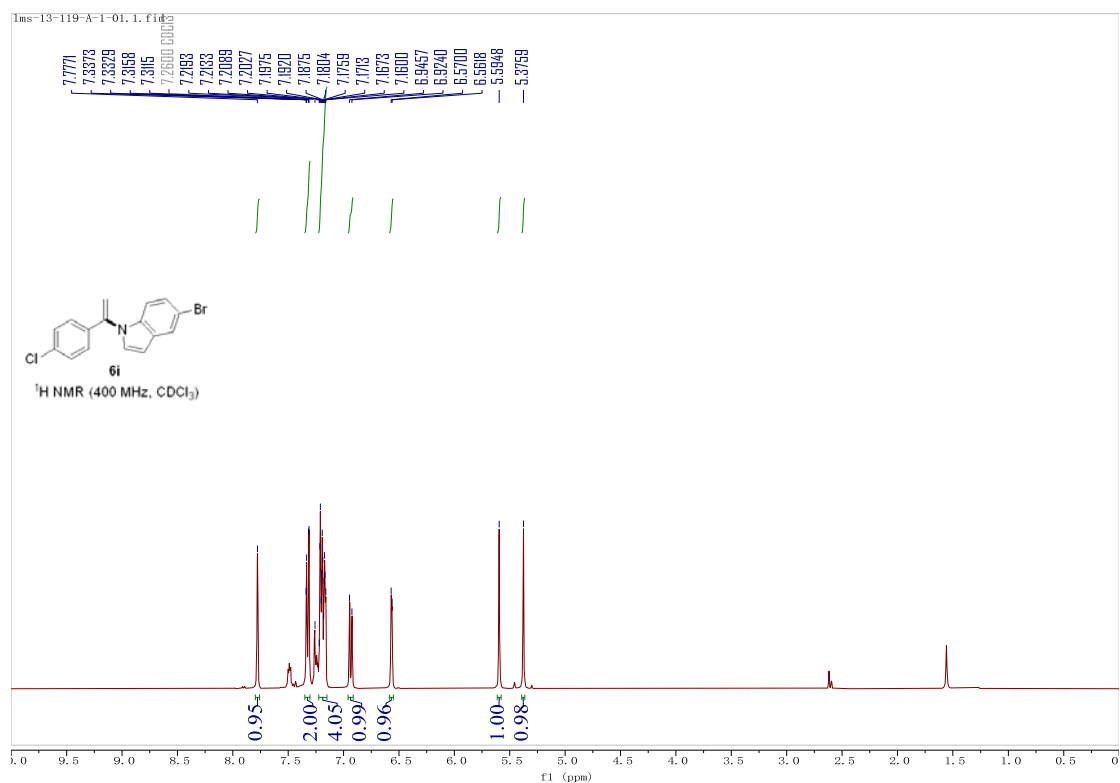



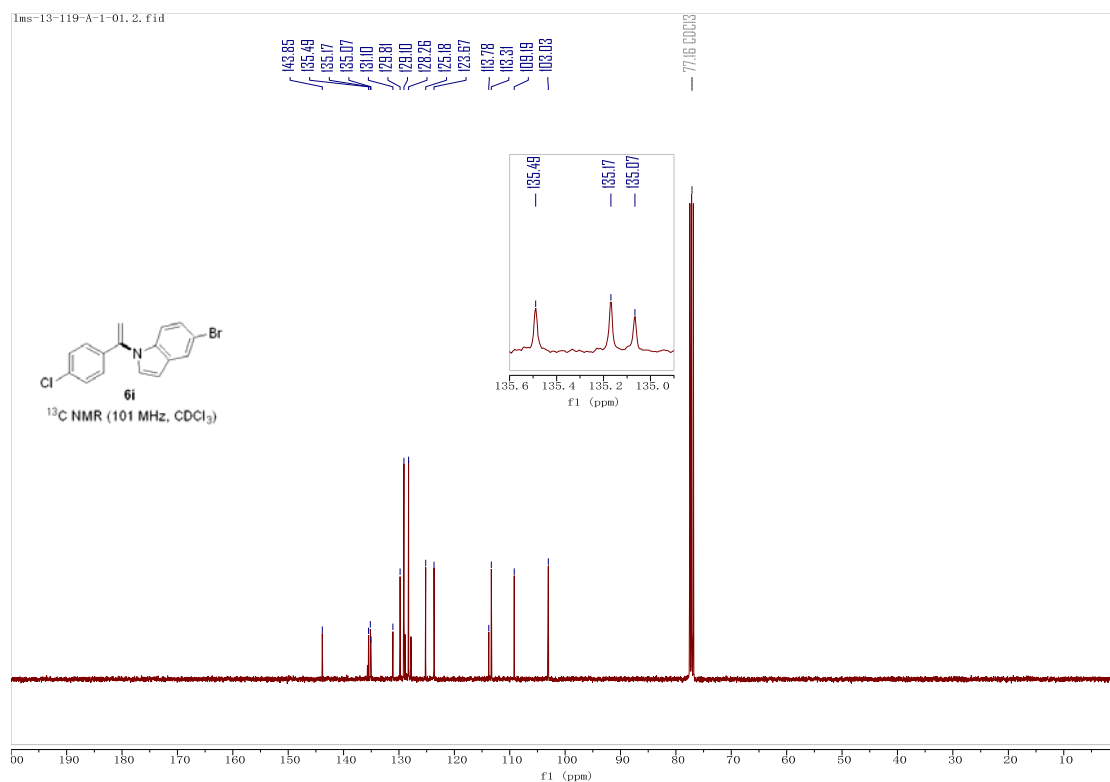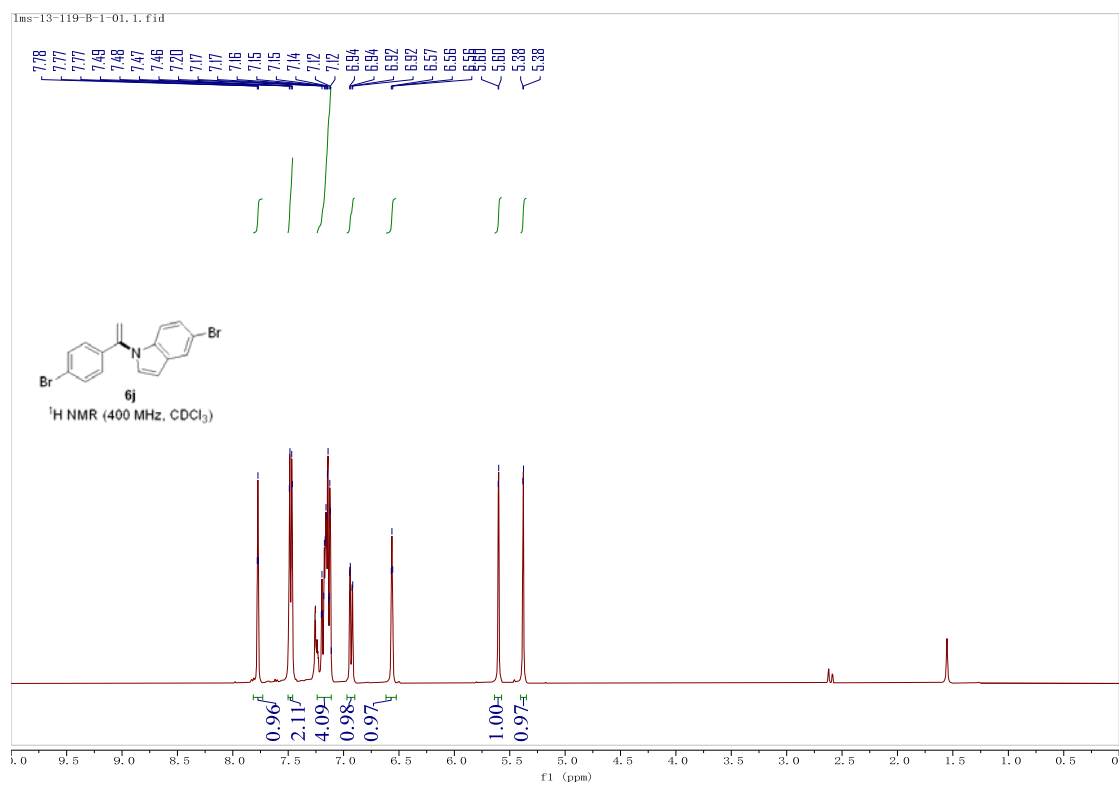

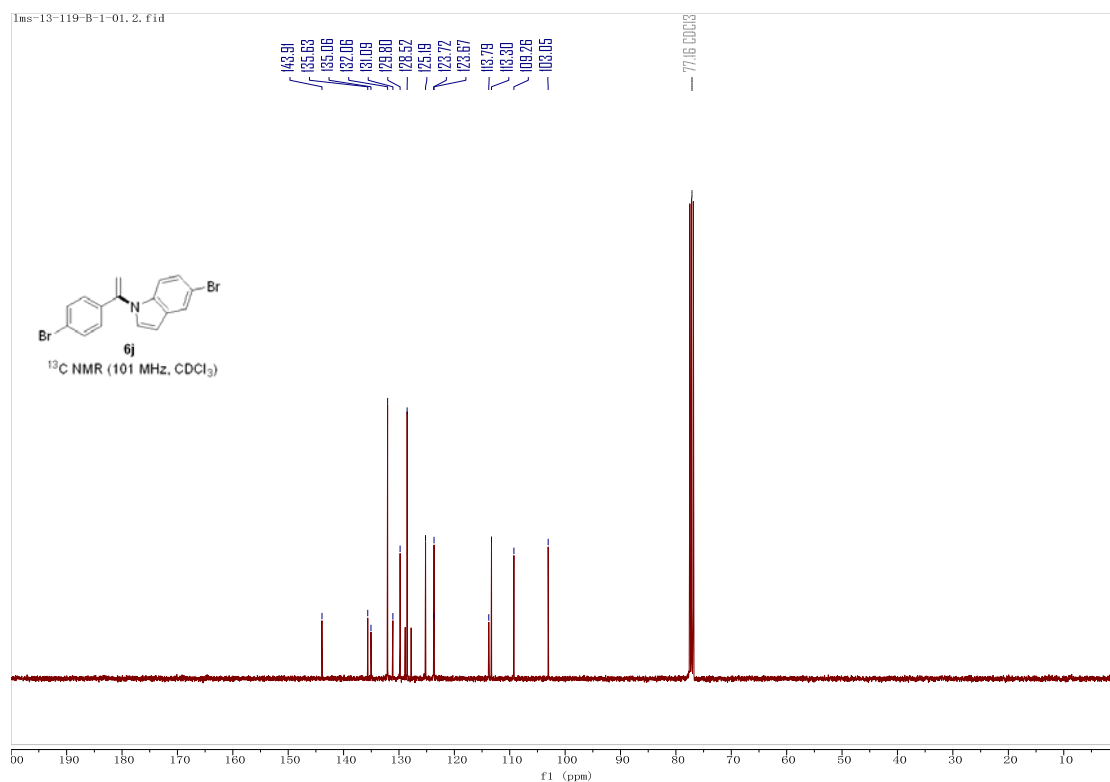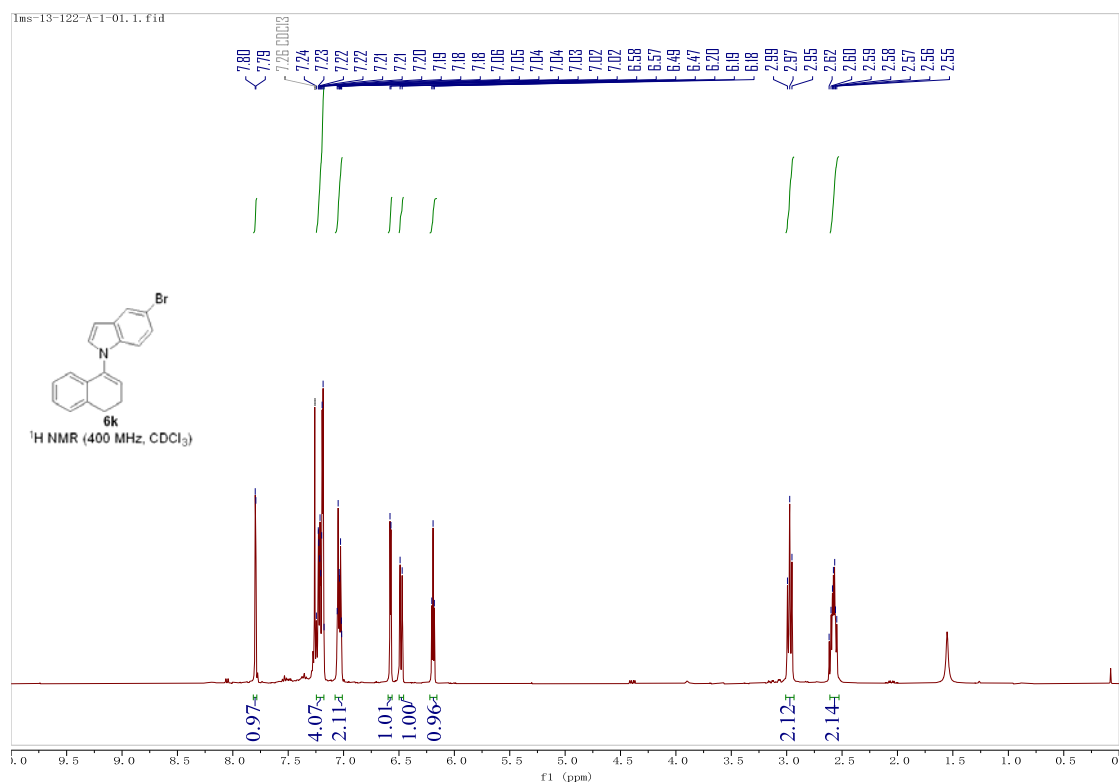

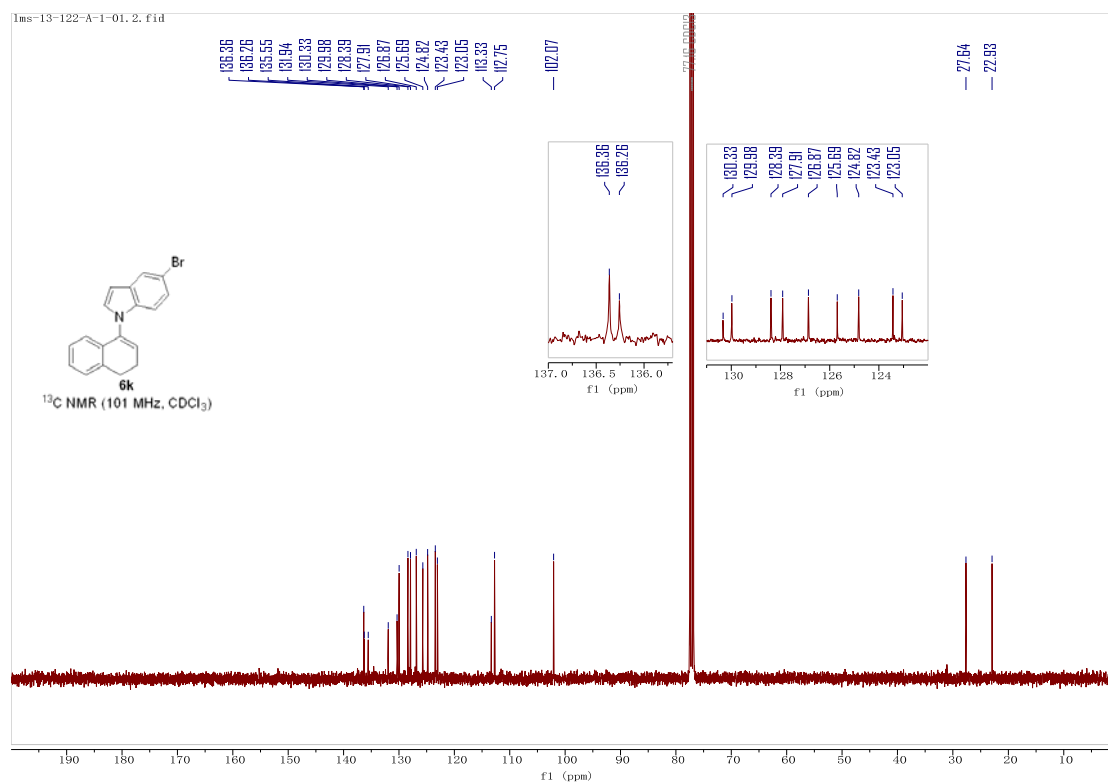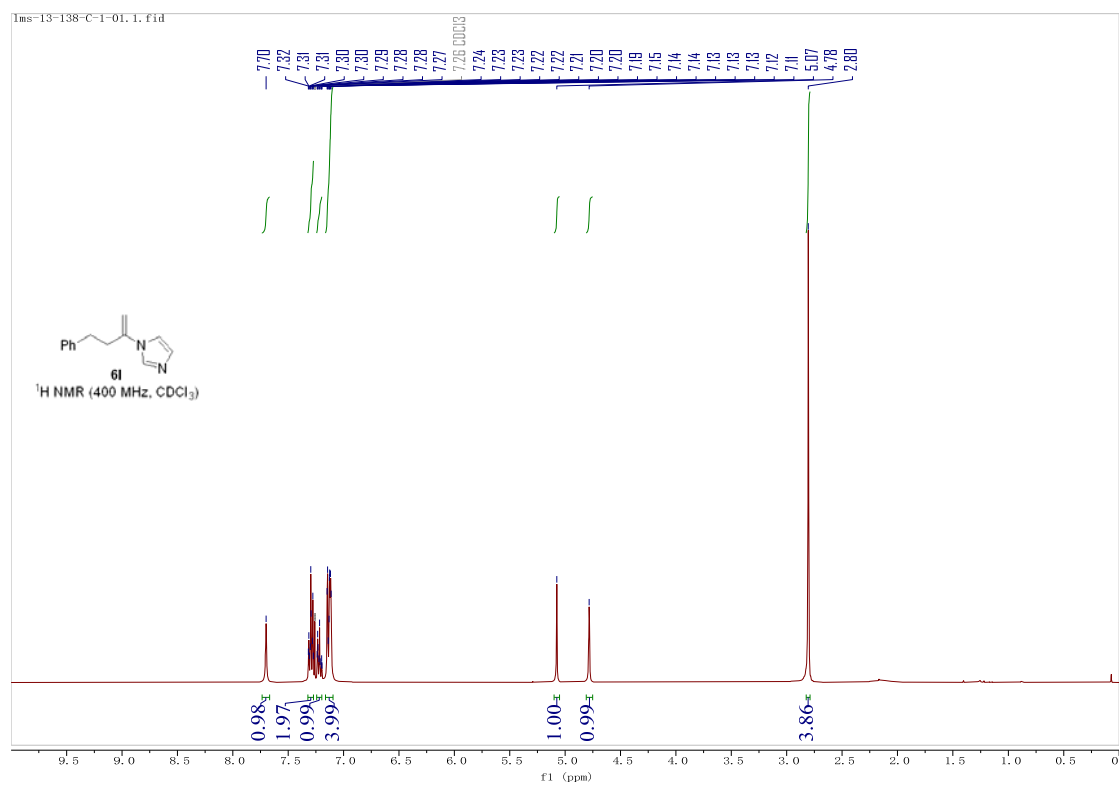

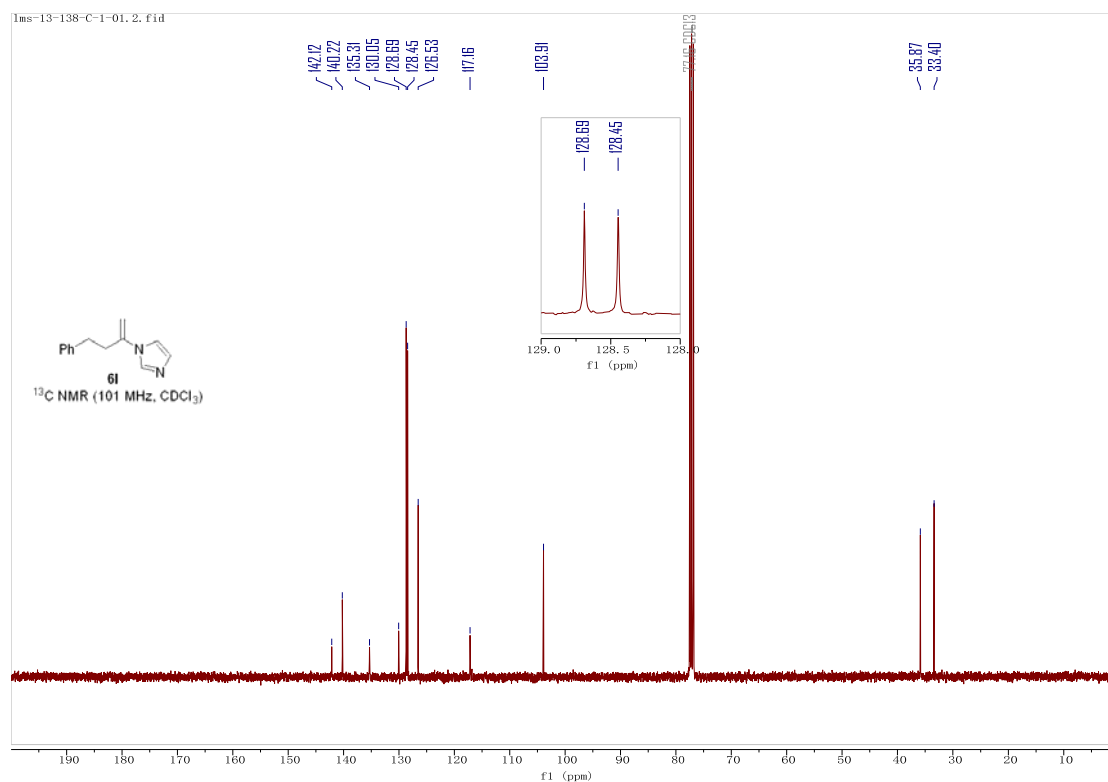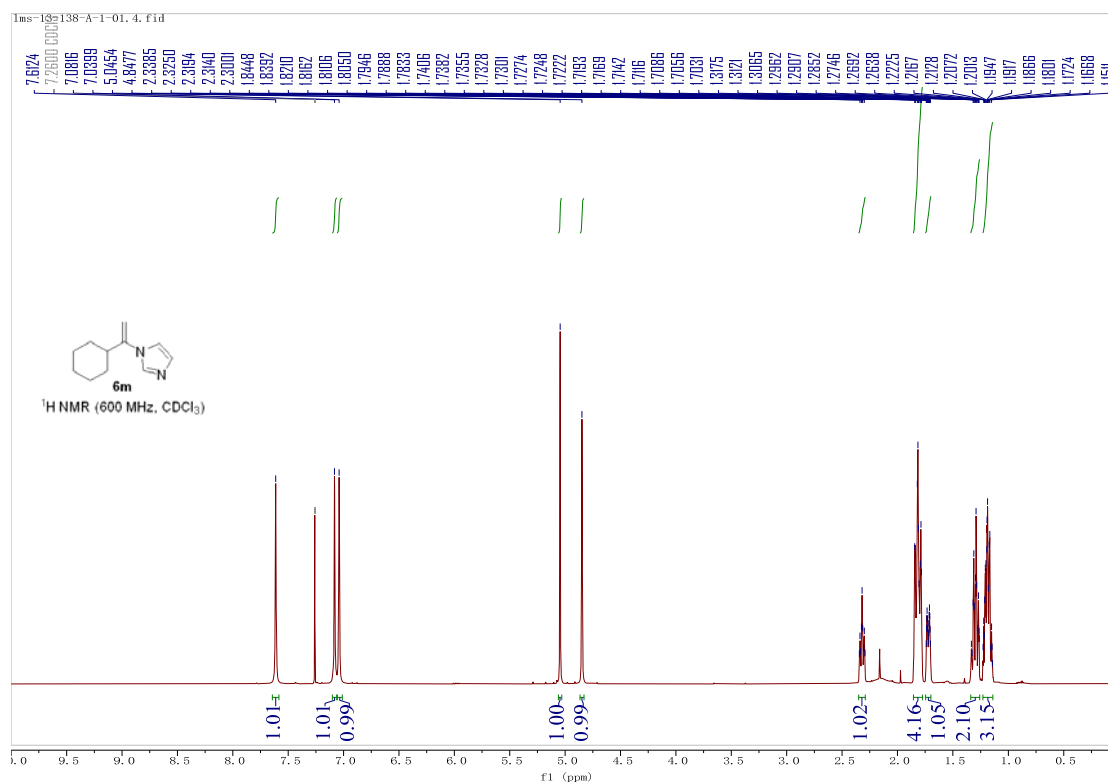

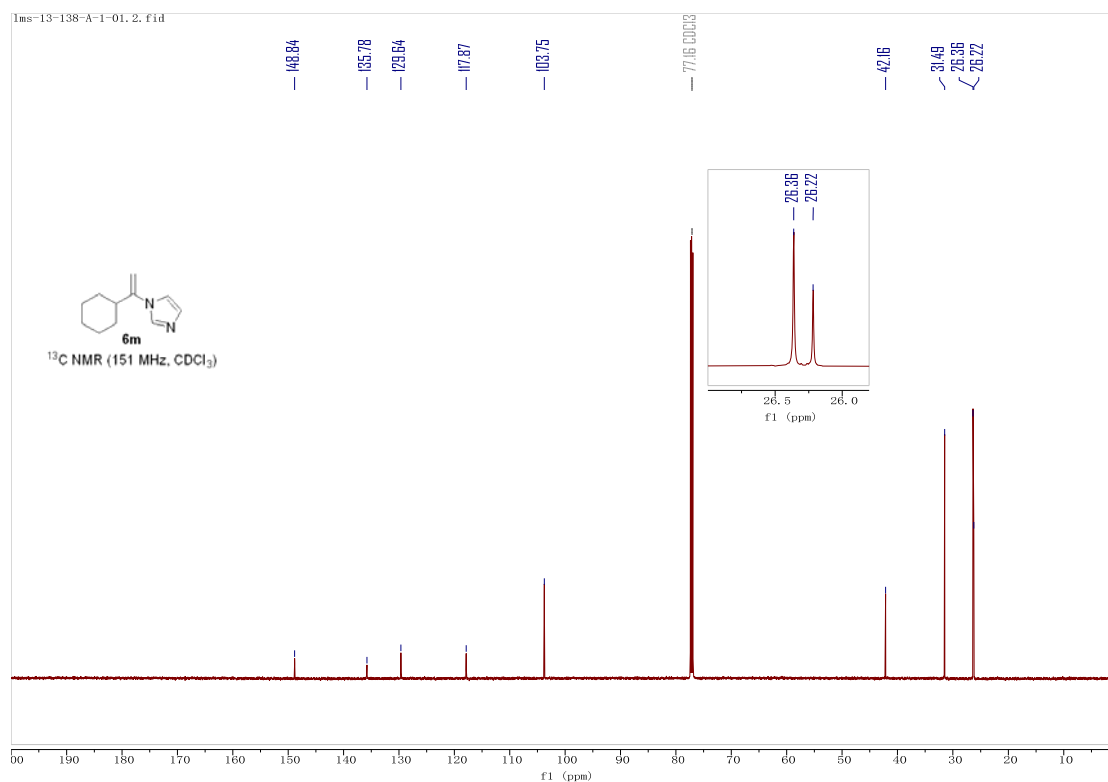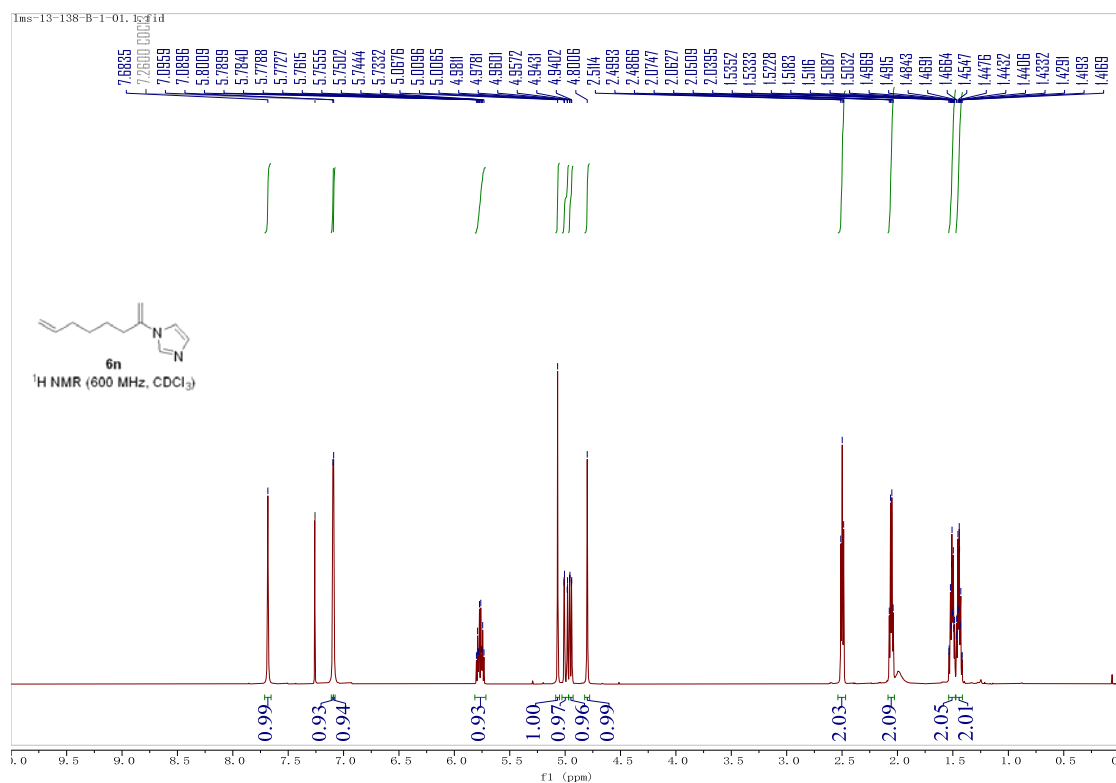

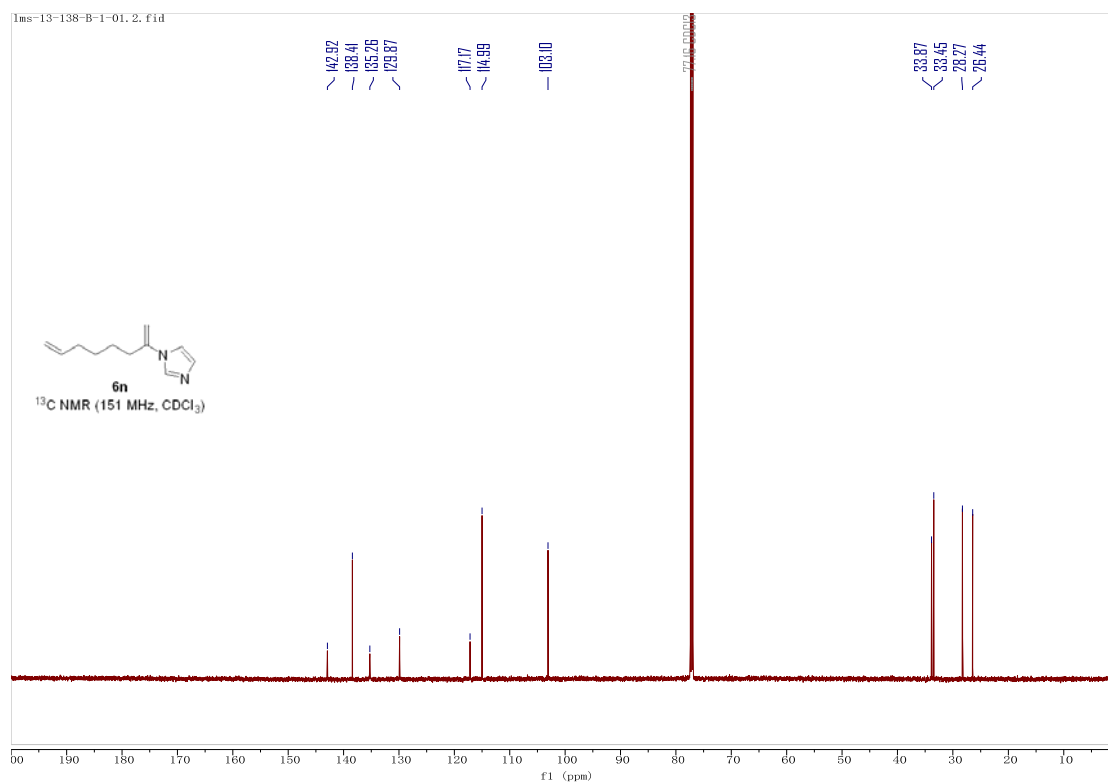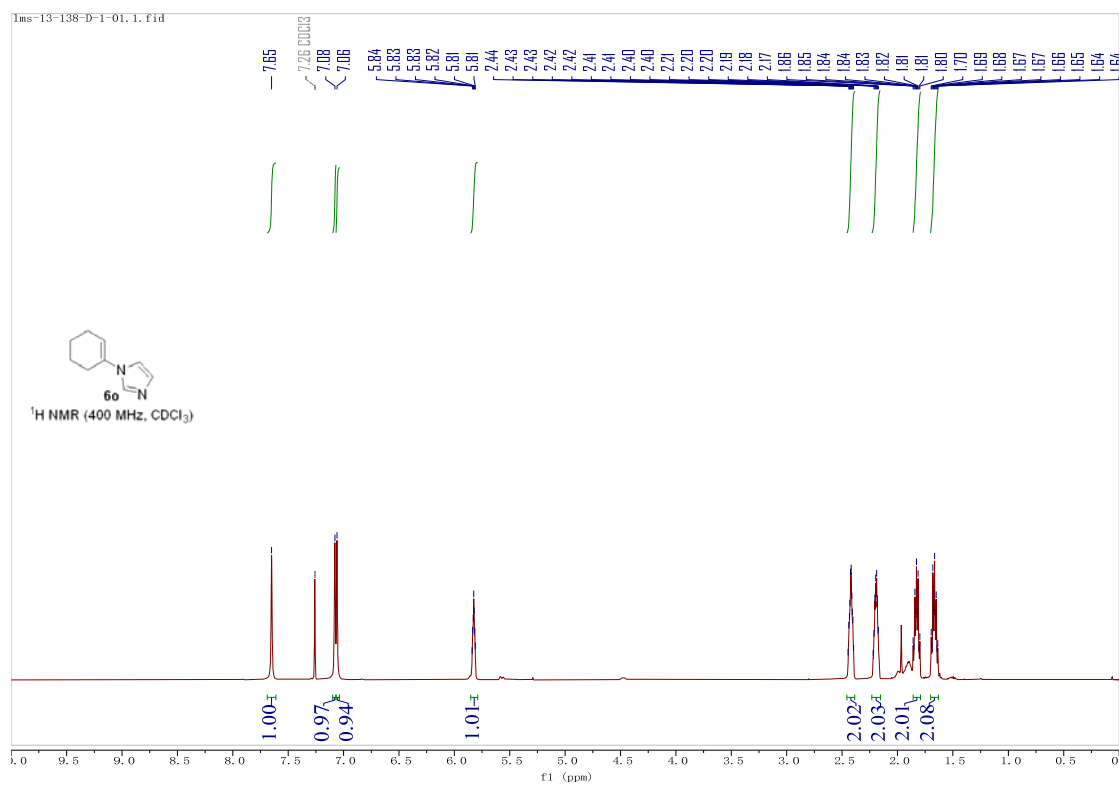

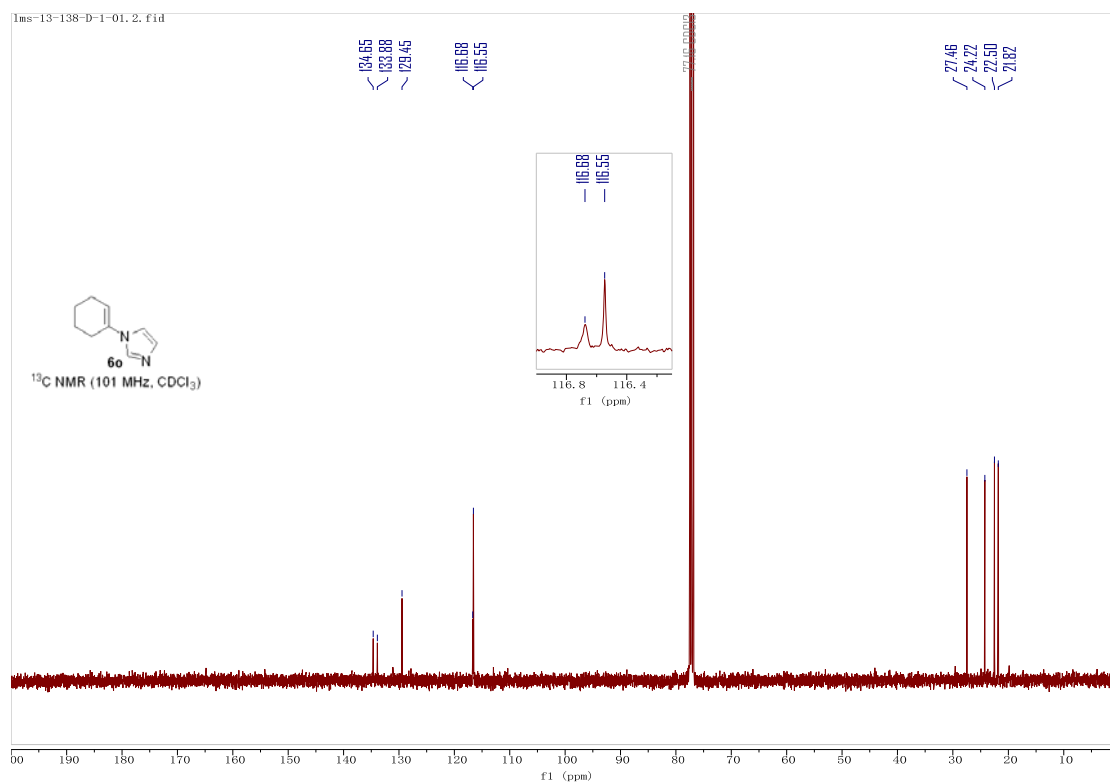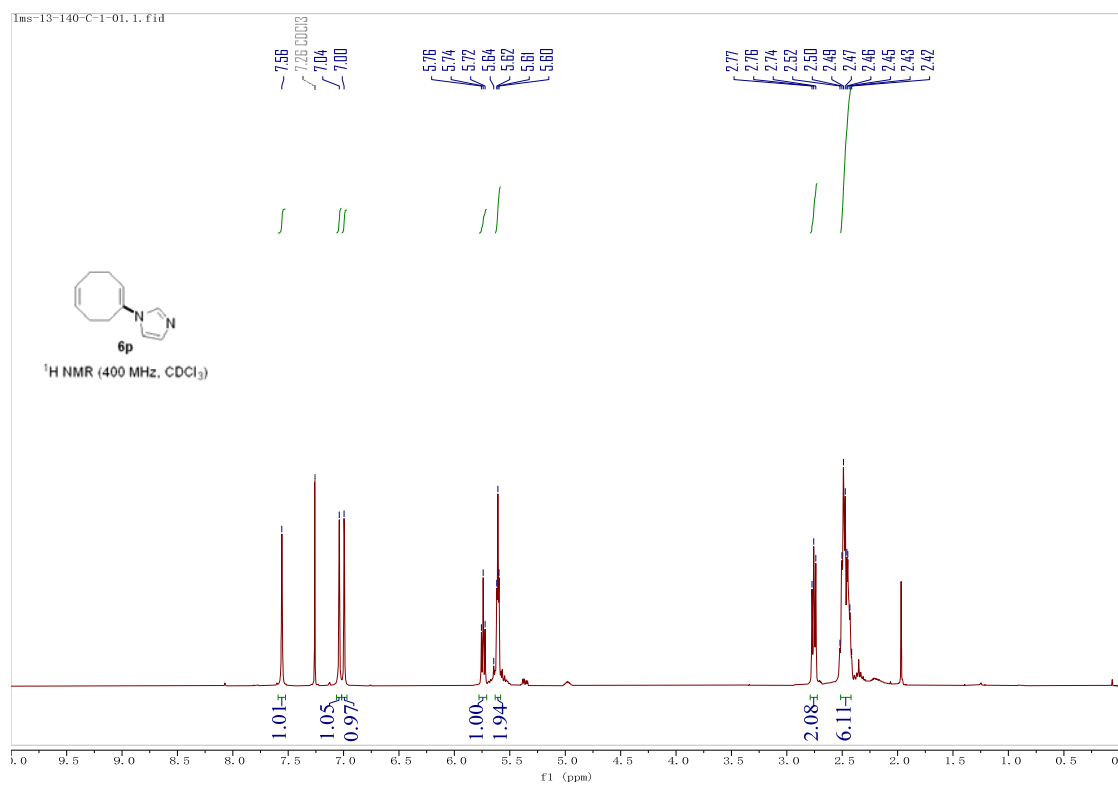

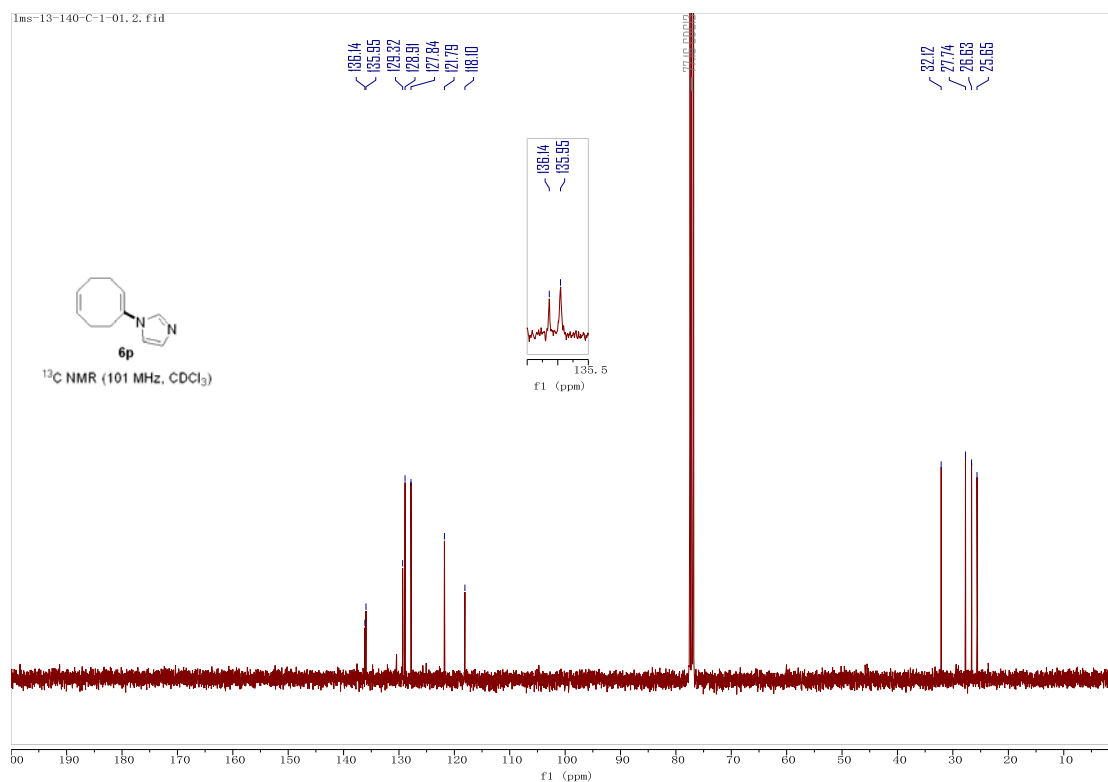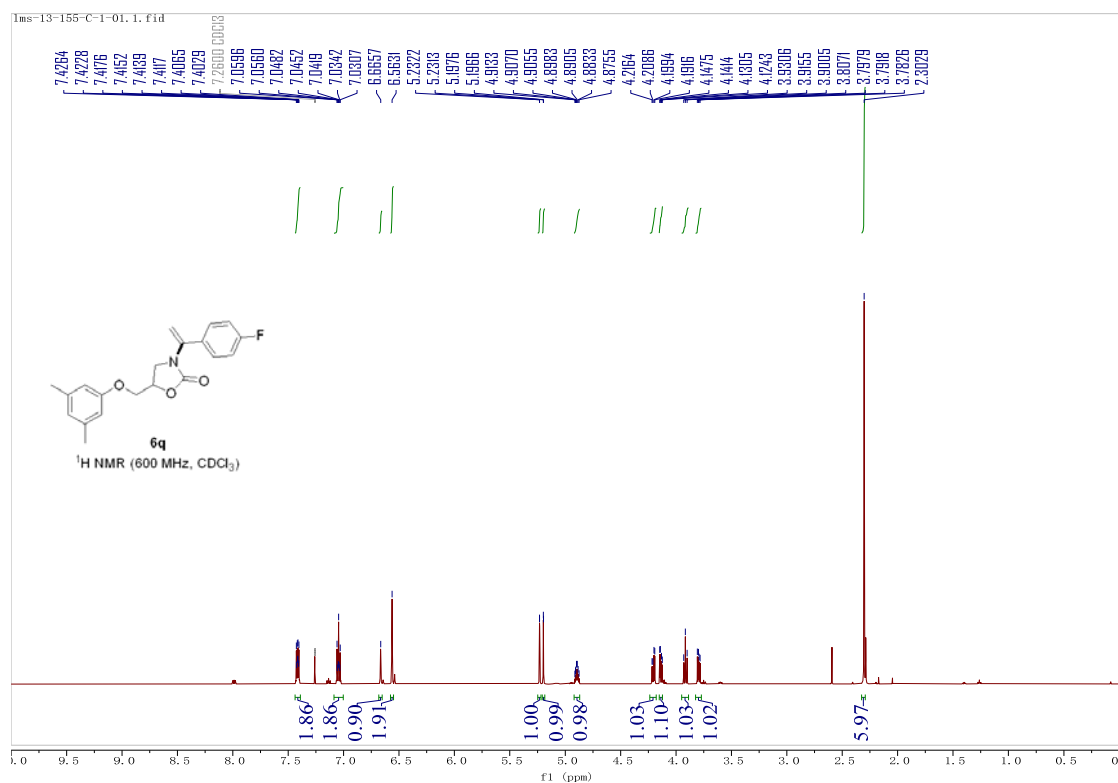



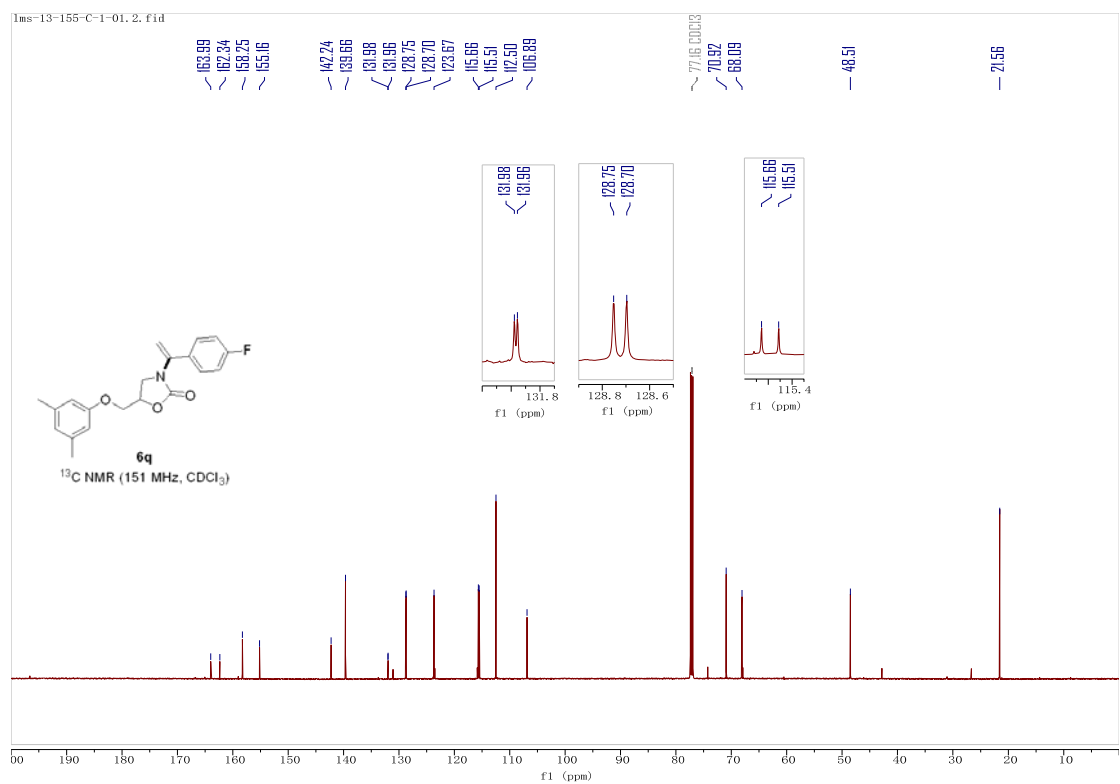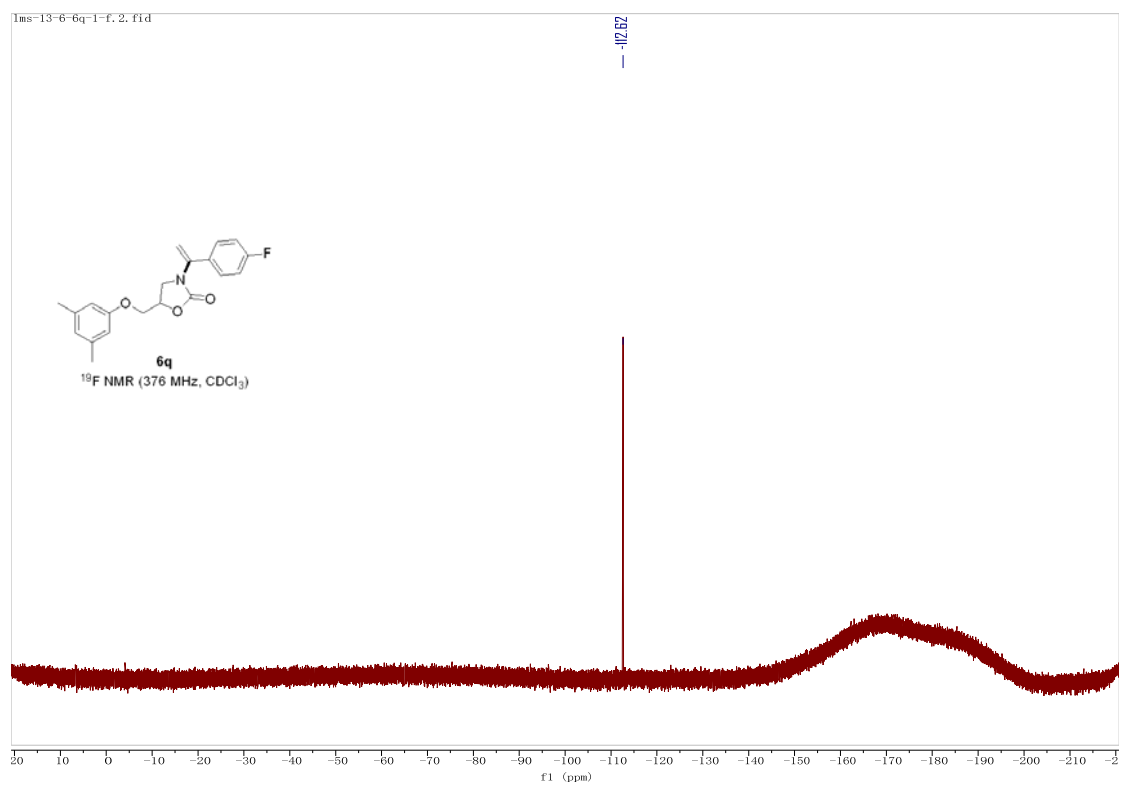

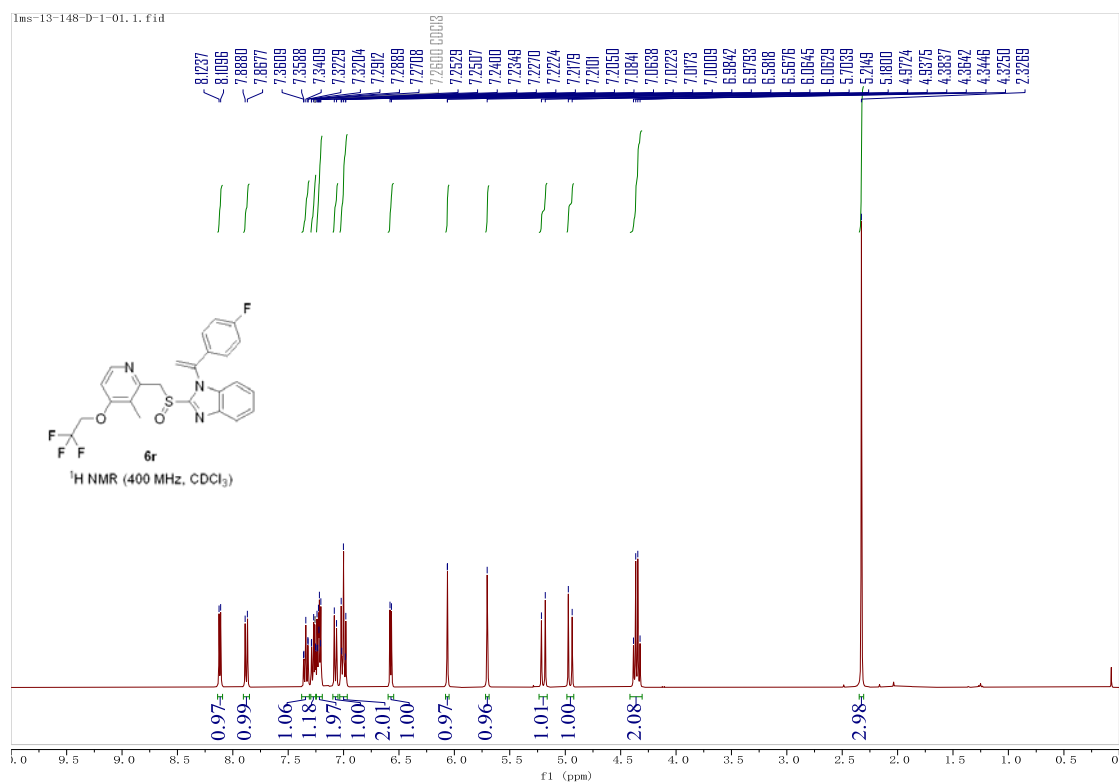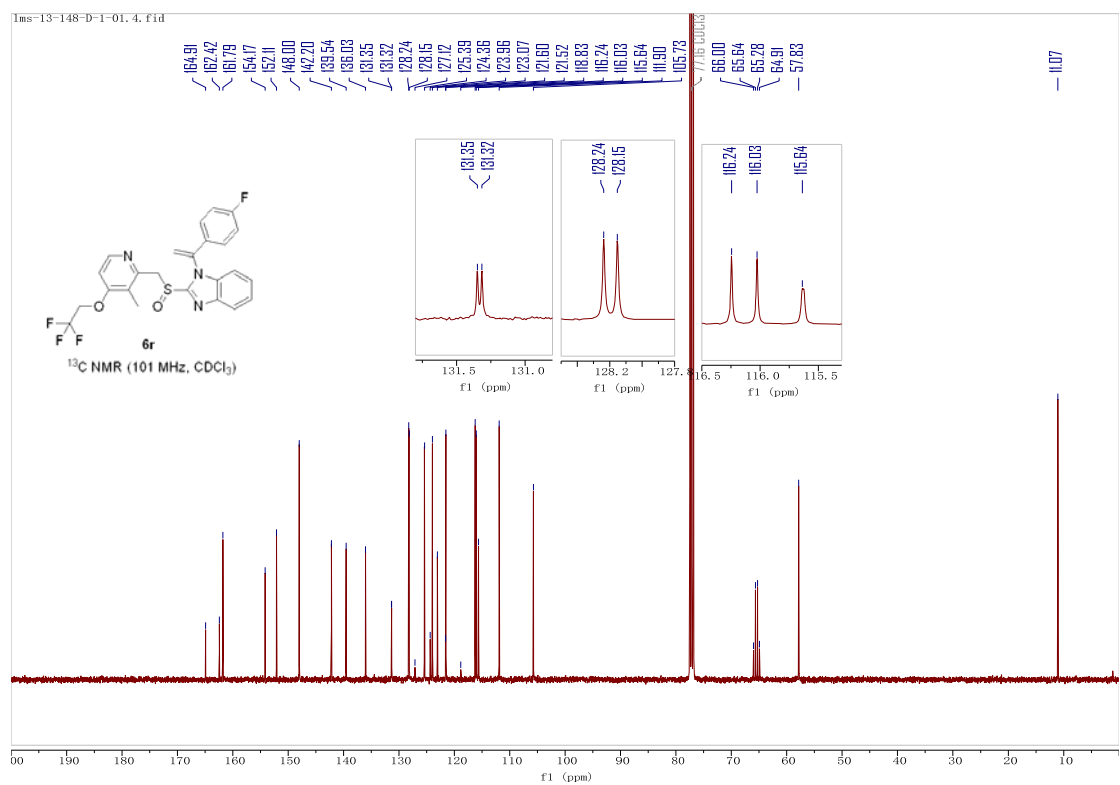

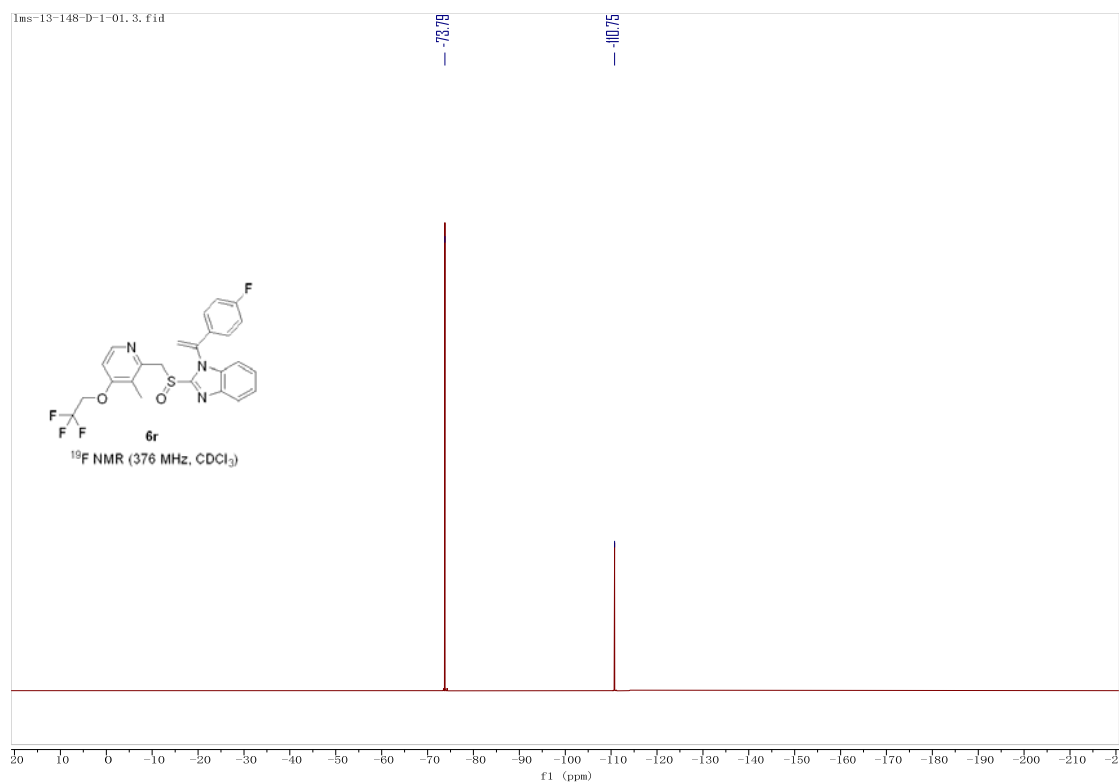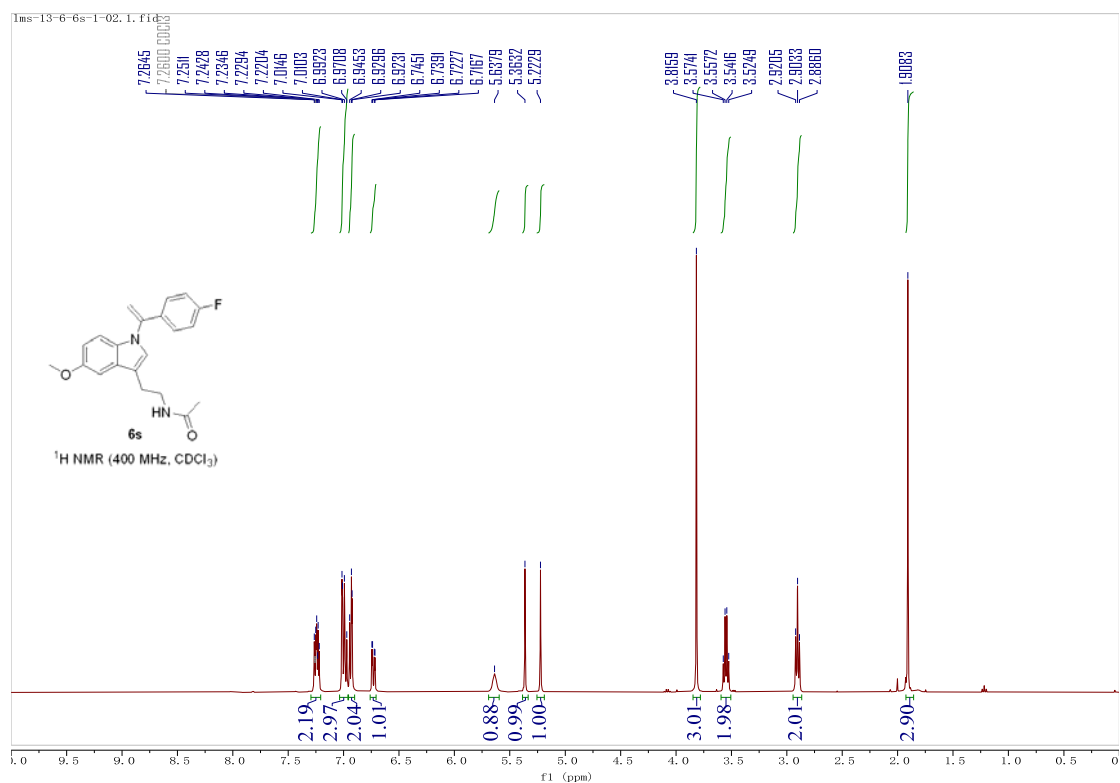

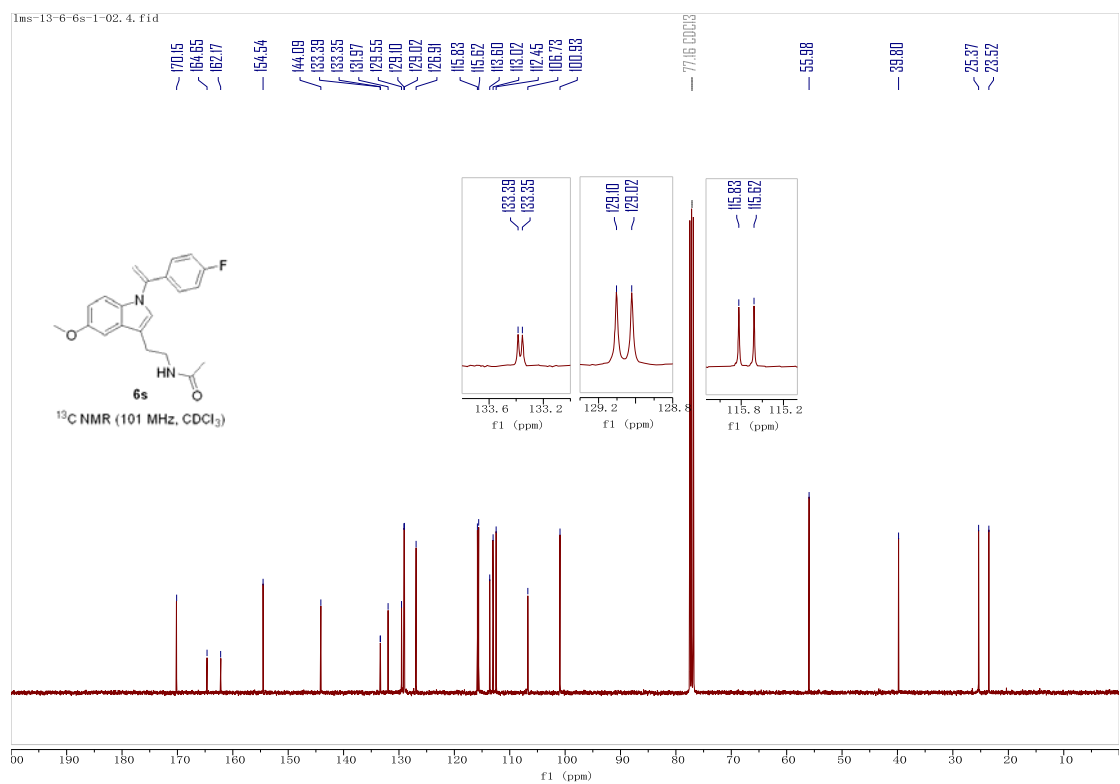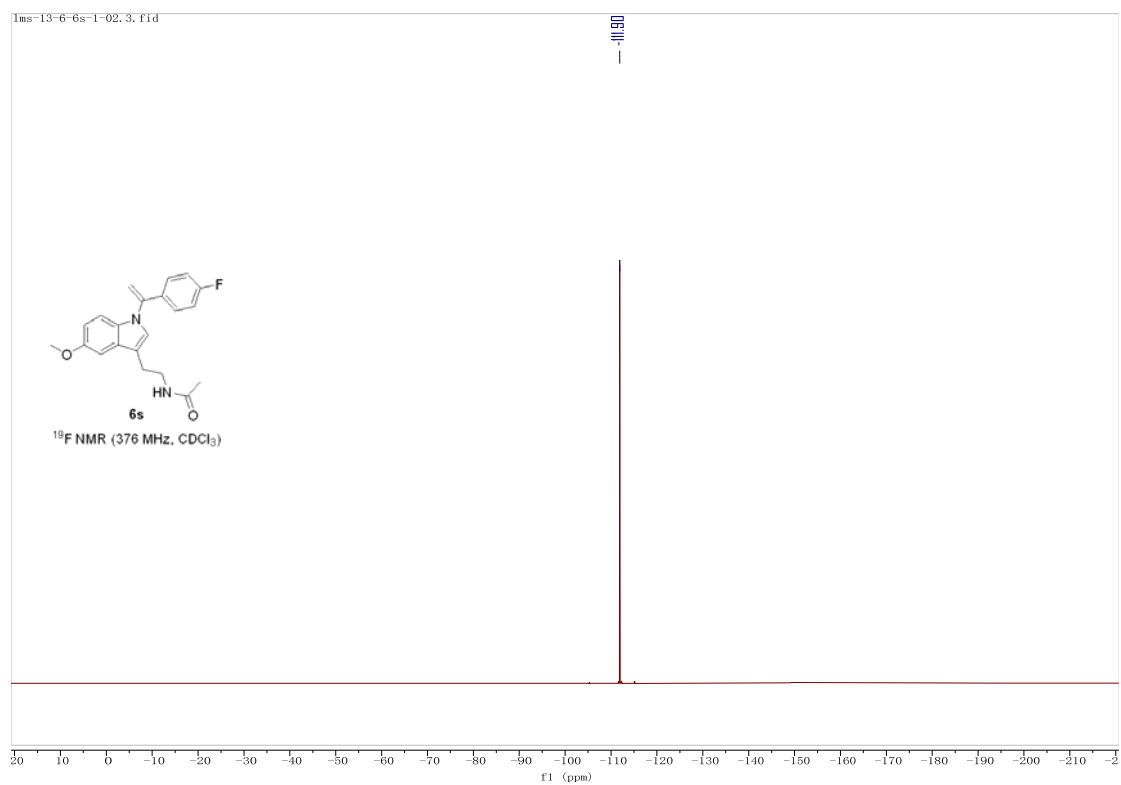

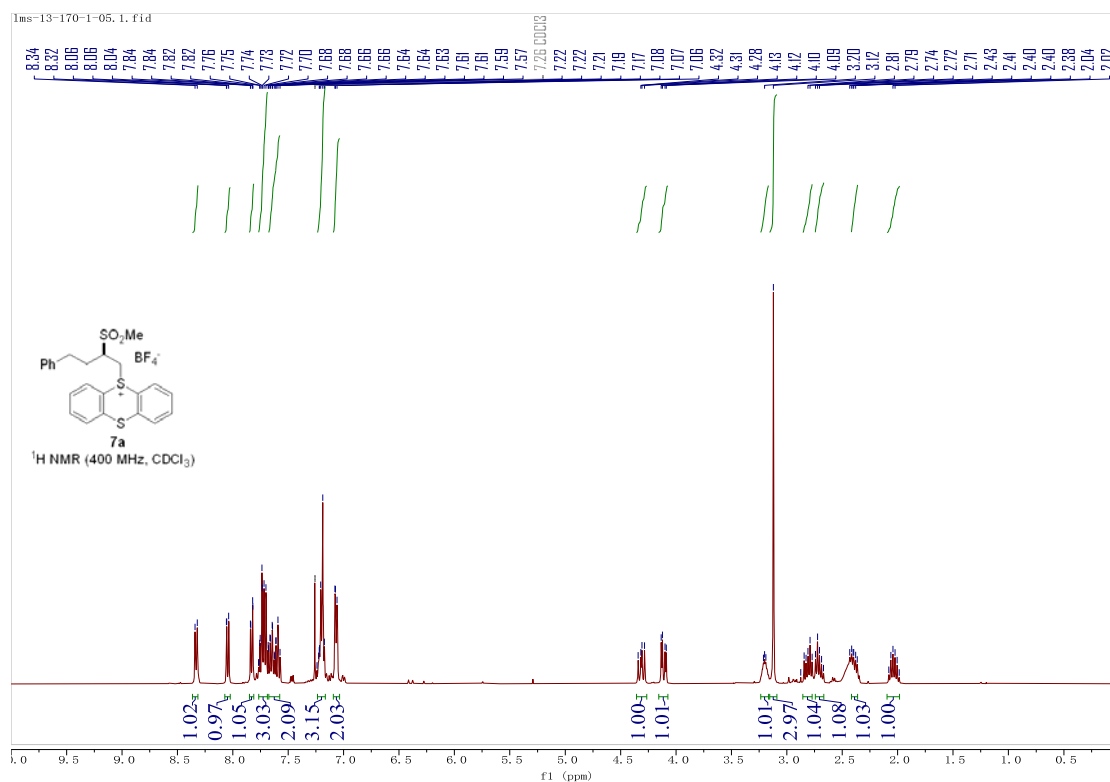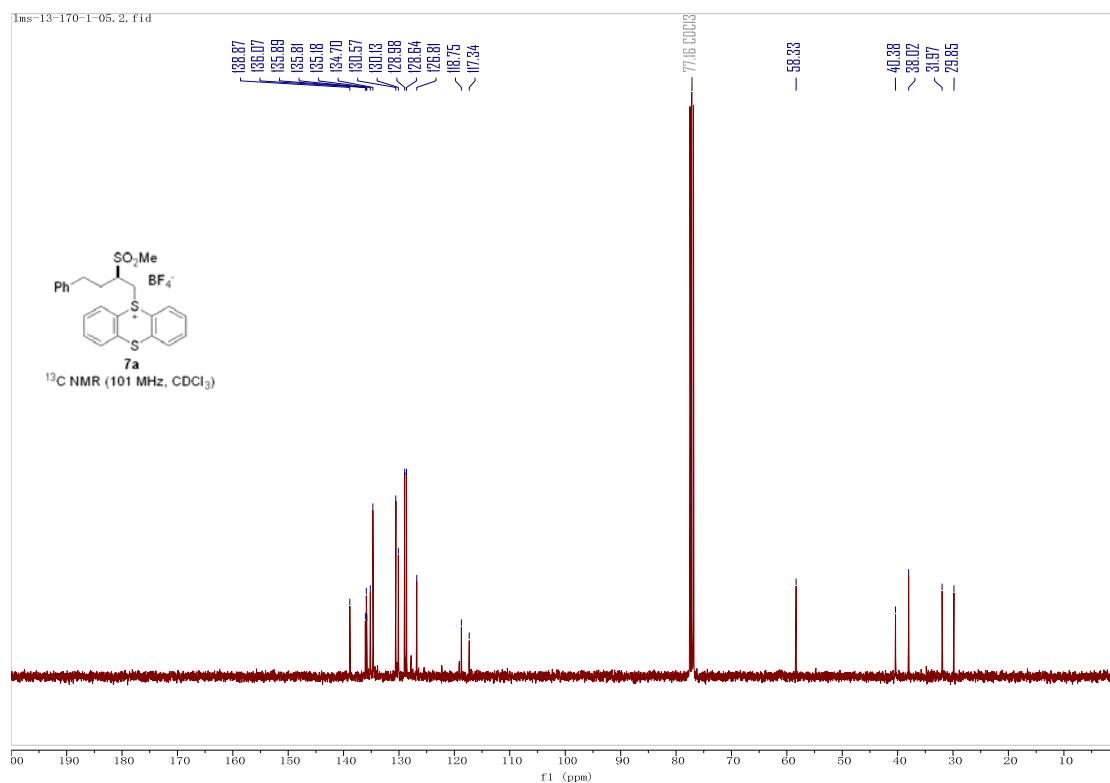

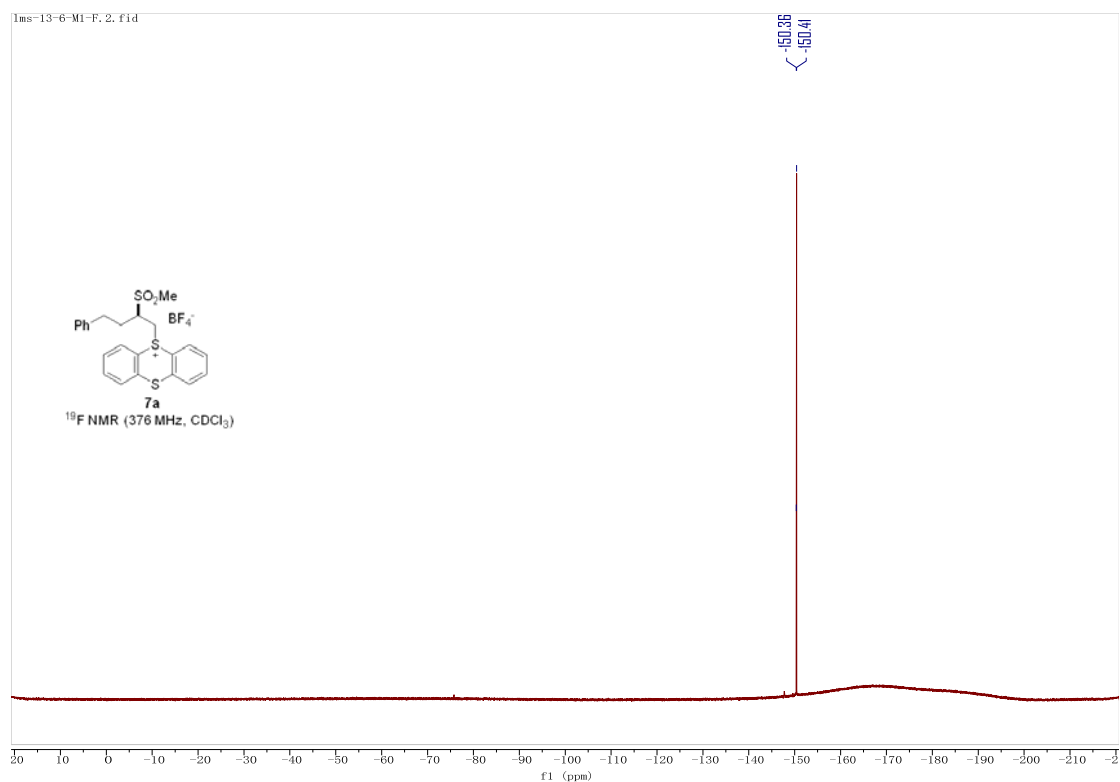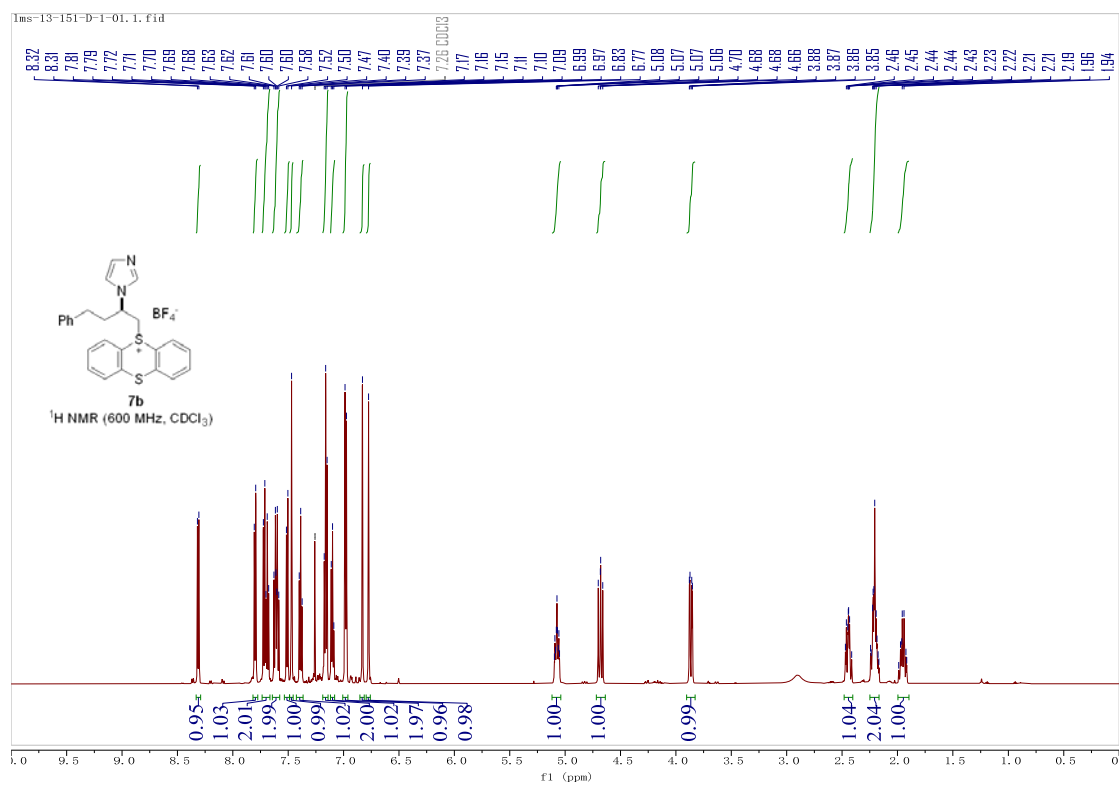

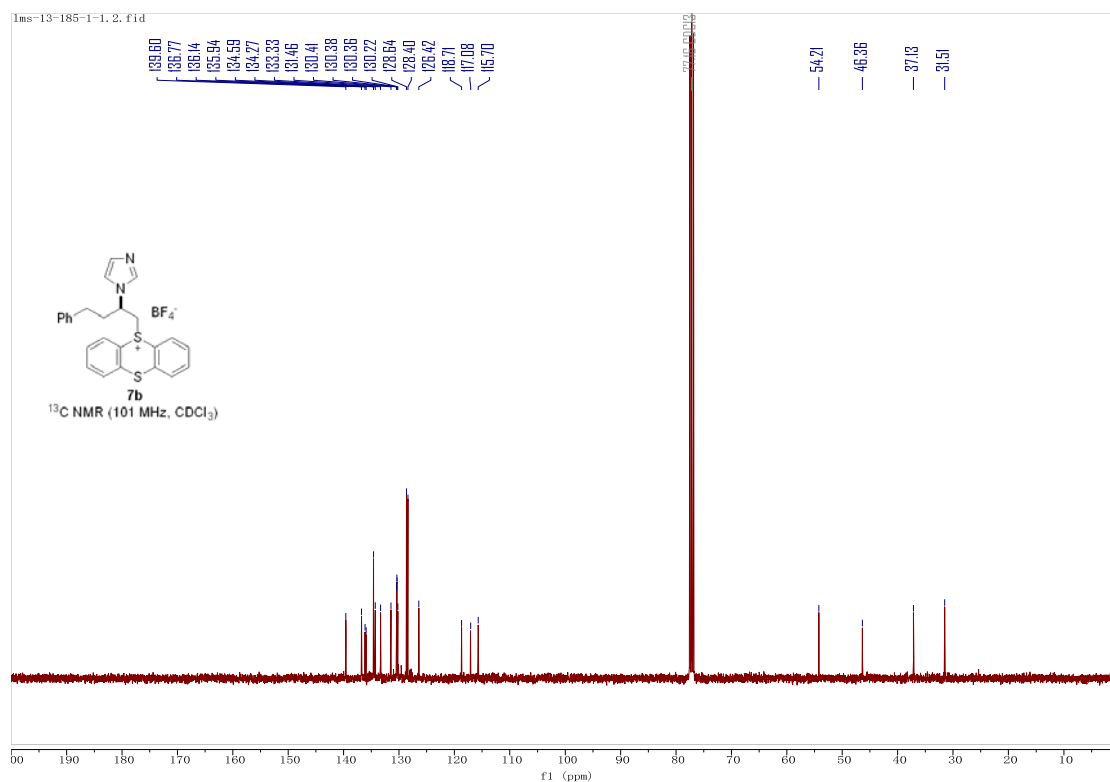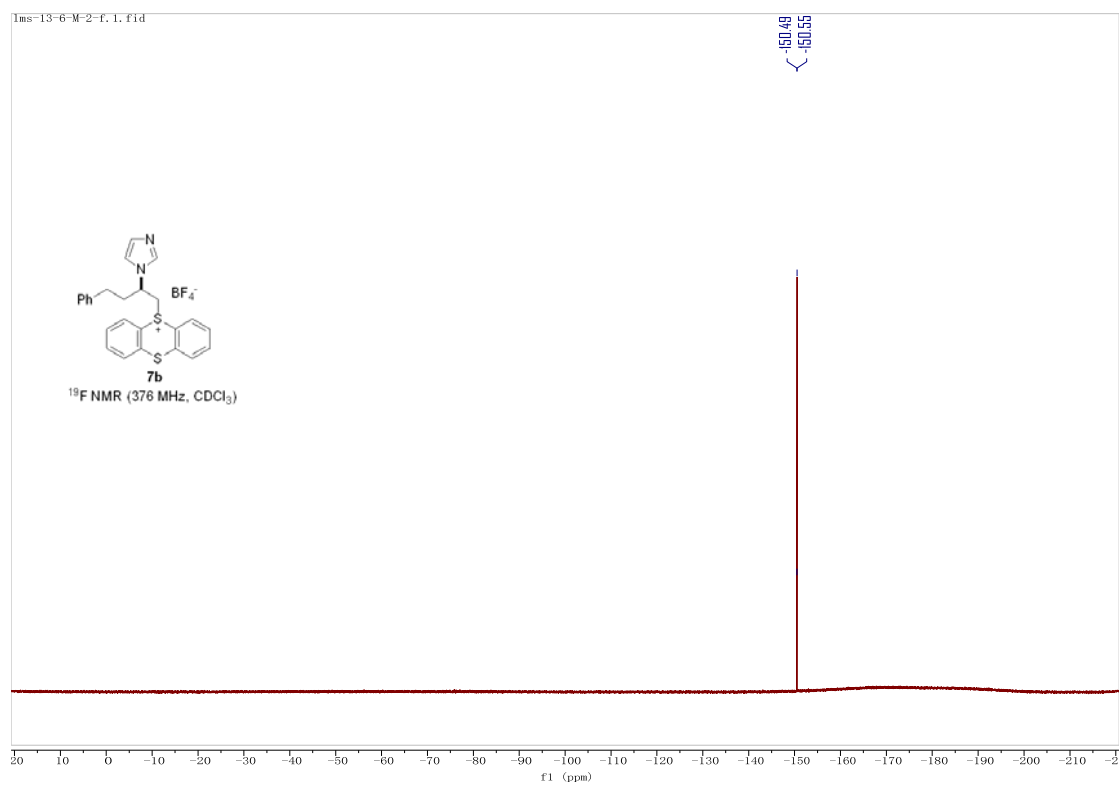

Supplement: Supplementary file 2 [file 51fe5cbbcd1f54066a4d5eef.pdf]
